# Supplementary material for: Natural carbolines inspired the discovery of chiral CarOx ligands for asymmetric synthesis and antifungal leads
Source: Royal Society of Chemistry journal article supplement (doi:10.1039/d0qo00519c), 2020-01-01

*Supplementary Information for*

**Natural Carbolines Inspired the Discovery of Chiral CarOx Ligands  
for Asymmetric Synthesis and Antifungal Leads**

Jixing Lai,<sup>†</sup> Wei Li,<sup>†</sup> Sanyue Wei,<sup>†</sup> Shengkun Li<sup>\*,†,‡</sup>

<sup>†</sup> Department of Pesticide Science, College of Plant Protection, Nanjing Agricultural University, Weigang 1, Xuanwu District, Nanjing 210095, People's Republic of China.

<sup>‡</sup> Laboratory Breeding Base of Green Pesticide and Agricultural Bioengineering, Key Laboratory of Green Pesticide and Agricultural Bioengineering, Ministry of Education, Guizhou University, Huaxi District, Guiyang 550025, China

Corresponding Author: Shengkun Li, Email [SKL505@outlook.com](mailto:SKL505@outlook.com)

## Content

|                                                                                                                |    |
|----------------------------------------------------------------------------------------------------------------|----|
| <b>General Information</b> .....                                                                               | 3  |
| <b>Synthesis and Structural Elucidation of <math>\beta^1</math>-CarOx Ligands</b> .....                        | 4  |
| Synthetic Route to the Chiral $\beta^1$ -CarOx Ligands .....                                                   | 4  |
| Characterization of the Synthesized Chiral $\beta^1$ -CarOx Ligands .....                                      | 6  |
| <b>Synthesis and Structural Elucidation of <math>\beta^3</math>-CarOx Ligands</b> .....                        | 12 |
| Synthetic Route to the Chiral $\beta^3$ -CarOx Ligands .....                                                   | 12 |
| Characterization of the Synthesized Chiral $\beta^3$ -CarOx Ligands .....                                      | 15 |
| <b>Enantioselective Michael Addition of Arylboronic Acids to Nitroalkenes:</b> .....                           | 16 |
| General procedure .....                                                                                        | 16 |
| Optimization of the Reaction Conditions .....                                                                  | 17 |
| Substrate Scope .....                                                                                          | 18 |
| HPLC traces of the Enantioenriched $\beta$ -aryl nitroethanes .....                                            | 20 |
| <b>Enantioselective Addition of Arylboronic Acids to <math>\beta</math>-substituted Cyclic Enones</b><br>..... | 38 |
| General procedure .....                                                                                        | 38 |
| Concise optimization .....                                                                                     | 38 |
| Substrate Scope .....                                                                                          | 39 |
| HPLC traces of the Enantioenriched $\beta$ -aryl ketones .....                                                 | 40 |
| Synthesis and Application of Chiral Ligands L12 and L13 .....                                                  | 48 |
| <b>Antifungal Bioassay of CarOx Ligands</b> .....                                                              | 51 |
| Compounds Selected for Biotest .....                                                                           | 51 |
| Initial Screening .....                                                                                        | 52 |
| Precise Antifungal Test .....                                                                                  | 53 |
| <b>References</b> .....                                                                                        | 54 |
| <b>NMR Spectra Traces</b> .....                                                                                | 55 |

## General Information

Unless otherwise stated, all solvents and reagents were purchased from commercial sources (Energy or Meryer Chemicals etc.), they were analytically pure and used without further purification. Anhydrous solvents were dried and distilled by standard techniques before use or were purchased from commercial sources (Energy Chemicals etc.).

Silica gel GF<sub>254</sub> and column chromatography silica gel for isolation (200-300 mesh) were both purchased from Qingdao Broadchem Industrial Co., Ltd. Reaction progress was monitored by thin-layer chromatography (TLC) on silica gel GF<sub>254</sub> with ultraviolet (UV<sub>254nm</sub> or UV<sub>365nm</sub>) detection. <sup>1</sup>H NMR and <sup>13</sup>C NMR spectra were recorded on a Bruker AV 400 or Bruker AV 500 spectrometers with CDCl<sub>3</sub> as solvent and tetramethylsilane as the internal standard. The chemical shifts ( $\delta$ ) were recorded in parts per million (ppm). Data for <sup>1</sup>H NMR are reported as follows: chemical shift ( $\delta$ : ppm), multiplicity (s, singlet; d, doublet; t, triplet; q, quartet; and m, multiplet), coupling constant (Hz), integration and assignment (*H*). Data for <sup>13</sup>C NMR are reported in terms of chemical shift ( $\delta$ : ppm). Electrospray ionization high-resolution mass spectrometry (ESI-HRMS) data were also obtained with the Waters XEVO G2-XS Q-TOF mass spectrometer.

The agriculturally important plant pathogens were provided by the College of Plant Protection, Nanjing Agricultural University (Nanjing, China). The *in vitro* antifungal activities of the synthesized natural product alangiobussinine and its analogues were carried out according to the procedures we used previously<sup>[1]</sup>.

## Synthesis and Structural Elucidation of $\beta^1$ -CarOx Ligands

### Synthetic Route to the Chiral $\beta^1$ -CarOx Ligands

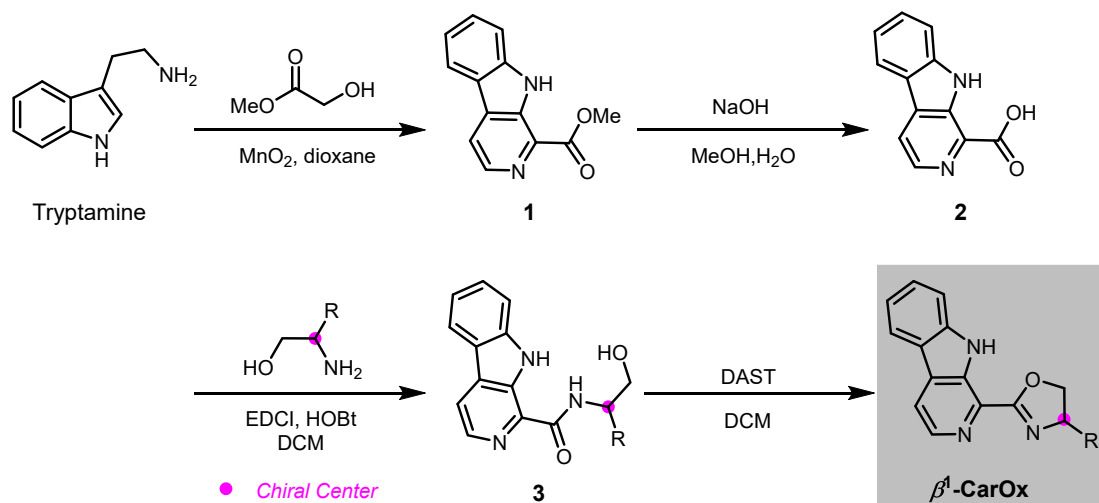

**Step 1**, Synthesis of the intermediate **1** according to the report by Lang,<sup>[2]</sup> To a stirred suspension of tryptamine (3.2 g, 20 mmol) and 3A MS (20 g) was added 1,4-dioxane (50 mL).  $\text{MnO}_2$  (17 g) and methyl glycolate (2.7 mL) was added dropwise at 0 °C. The heterogeneous mixture was stirred at room temperature for 3h and then was immersed in a preheated oil bath (110 °C) until the full consumption of the starting material was detected by thin layer chromatography (TLC). The heterogeneous mixture was filtered and rinsed with ethyl acetate. The organic phase concentrated under vacuum. Purification by silica gel column chromatography on silica gel (200-300m) with hexane/EtOAc (2:1, v/v) as the eluent gave the  $\beta$ -carboline-1-carboxylic methyl ester (intermediate **1**) as yellow solid in 42% yield.

**Step 2**, To a stirred suspension of  $\beta$ -carboline-1-carboxylic methyl ester **1** (2.26 g, 10 mmol) was added methanol (30 mL). Aqueous sodium hydroxide solution (10 mL, 1 M) was added dropwise at 0 °C. The heterogeneous mixture was immersed in a preheated oil bath (50 °C) and was stirred until the full consumption of the starting material was detected by thin layer chromatography (TLC). The mixture was concentrated under vacuum to remove methanol, and was adjusted to pH 6-7 with hydrochloric acid, from which the  $\beta$ -carboline-1-carboxylic acid (intermediate **2**) was precipitated, the heterogeneous mixture was filtered, and the  $\beta$ -carboline-1-carboxylic



acid intermediate **2** was collected and dried as a yellow solid in 89% yield.

**Step 3, general procedure of Steglich Condensation:** To a dried Schlenk flask charged with the synthesized  $\beta$ -carboline-1-carboxylic acid, compound **2**, (1 mmol, 212 mg) and the specific chiral amino alcohol (1 mmol), was added anhydrous dichloromethane (5 mL) for dissolution. Hydroxybenzotriazole (HOBt) (175 mg, 1.3 mmol) and *N*-(3-(dimethyl amino)propyl)-*N'*-ethylcarbodiimide hydrochloride (EDCI-HCl) (0.25 g, 1.3 mmol) were then added while the reaction flask was in an ice bath. The mixture was allowed to gradually warm to room temperature, and it was stirred overnight until full consumption of the carboxylic acid detected by thin layer chromatography (TLC). The mixture was quenched by the addition of a saturated aqueous solution of NaHCO<sub>3</sub> (20 mL) and separated. The water phase was extracted with dichloromethane (10 mL  $\times$  3), and the combined organic phase was sequentially washed with water (10 mL  $\times$  2) and saturated aqueous NaCl (10 mL), dried over anhydrous sodium sulfate, and concentrated under vacuum. Purification by silica gel column chromatography on silica gel (200-300m) with hexane/EtOAc (2:1, v/v) as the eluent gave the amide intermediate **3**.

Yields for the intermediate **3** are listed below,

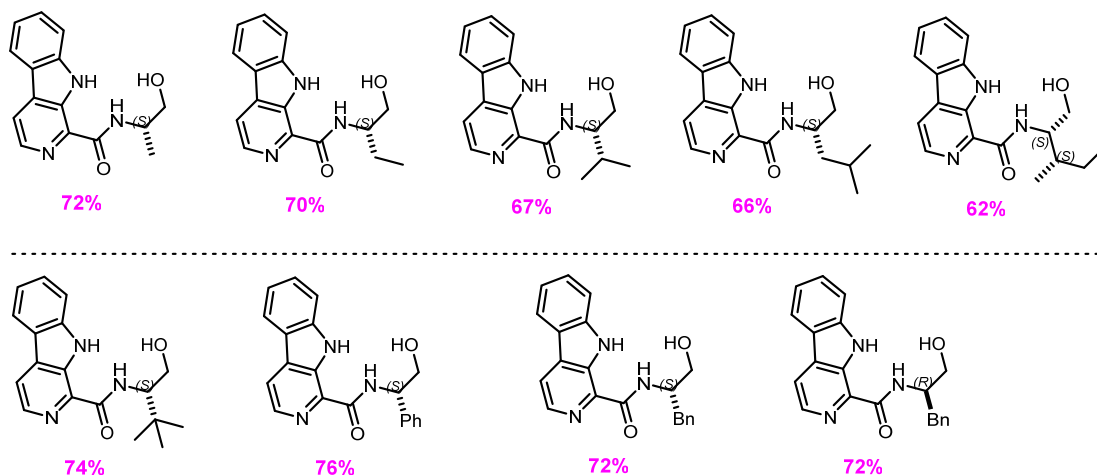

**Step 4, General procedure for the DAST mediated cyclization to produce  $\beta^1$ -CarOx Ligand:** To a Schlenk tube charged the amide intermediate **3** (1.0 mmol) was added anhydrous DCM (5.0 mL) under N<sub>2</sub> atmosphere. Diethylaminosulfur trifluoride (DAST) (160mg, 1mmol) was added dropwise at -78 °C. The reaction mixture was

stirred at  $-78^{\circ}\text{C}$  until the full consumption of the starting material was detected by TLC. The mixture was quenched by the addition of a saturated aqueous solution of  $\text{NaHCO}_3$  (10 mL) and separated, The water phase was extracted with dichloromethane (10 mL  $\times$  3), and the combined organic phase was sequentially washed with water (10 mL  $\times$  2) and saturated aqueous  $\text{NaCl}$  (10 mL), dried over anhydrous sodium sulfate, and concentrated under vacuum. Purification by silica gel column chromatography on silica gel (200-300m) with hexane/EtOAc (2:1, v/v) as the eluent gave the chiral ligand  $\beta^1$ -CarOx.

Yields for the chiral ligands  $\beta^1$ -CarOx are listed below,

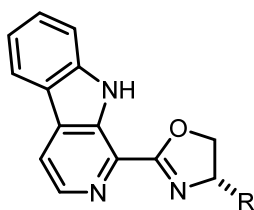

|                              |     |
|------------------------------|-----|
| L1: (S)-Me- $\beta^1$ CarOx  | 75% |
| L2: (S)-Et- $\beta^1$ CarOx  | 73% |
| L3: (S)-iPr- $\beta^1$ CarOx | 68% |
| L4: (S)-iBu- $\beta^1$ CarOx | 66% |
| L5: (S)-sBu- $\beta^1$ CarOx | 73% |
| L6: (S)-tBu- $\beta^1$ CarOx | 77% |
| L7: (S)-Ph- $\beta^1$ CarOx  | 75% |
| L8: (S)-Bn- $\beta^1$ CarOx  | 64% |

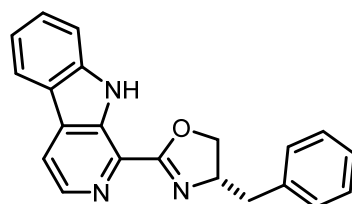

L9: (R)-Bn- $\beta^1$ CarOx 64%

### Characterization of the Synthesized Chiral $\beta^1$ -CarOx Ligands

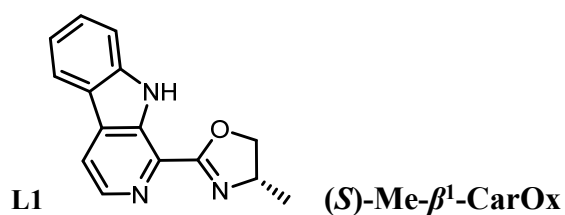

(S)-4-methyl-2-(9H-pyrido[3,4-b]indol-1-yl)-4,5-dihydrooxazole

White solid,  $^1\text{H-NMR}$  (400 MHz,  $\text{CDCl}_3$ )  $\delta$  1.47 (d,  $J = 6.44$  Hz, 3H,  $\text{CH}_3$ ), 4.12 (dd,  $J_1 = 7.60$  Hz,  $J_2 = 7.52$  Hz, 1H,  $\text{OCH}_2\text{CH}$ ), 4.58 (m, 1H,  $\text{OCH}_2\text{CH}$ ), 4.66 (dd,  $J_1 = 9.36$  Hz,  $J_2 = 7.84$  Hz, 1H,  $\text{OCH}_2\text{CH}$ ), 7.31 (m, 1H,  $H$  in Benzene Ring), 7.57-7.60 (m, 2H,

*H in Benzene Ring*), 8.04 (d,  $J = 5.08$  Hz, 1H, *H in Pyridine Ring*), 8.13 (dd,  $J_1 = 7.88$  Hz,  $J_2 = 0.96$  Hz, 1H, *H in Benzene Ring*), 8.54 (d,  $J = 5.08$  Hz, 1H, *H in Pyridine Ring*), 10.4 (s, br, 1H, *NH*).

$^{13}\text{C}$  NMR (100 MHz,  $\text{CDCl}_3$ )  $\delta$  21.8, 62.3, 73.9, 111.9, 116.9, 120.3, 121.3, 121.9, 128.9, 129.0, 129.9, 135.8, 138.7, 140.6, 163.1.

HRESI-MS: calcd for  $\text{C}_{15}\text{H}_{14}\text{N}_3\text{O}$   $[\text{M} + \text{H}]^+$ : 252.1137, found: 252.1140.

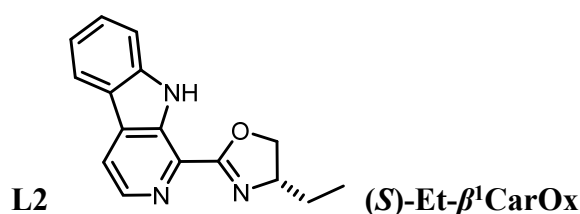

**(S)-4-ethyl-2-(9H-pyrido[3,4-b]indol-1-yl)-4,5-dihydrooxazole**

White solid,  $^1\text{H}$ -NMR (400 MHz,  $\text{CDCl}_3$ )  $\delta$  1.10 (t,  $J = 7.36$  Hz, 3H,  $\text{CH}_2\text{CH}_3$ ), 1.75 (m, 1H,  $\text{CH}_2\text{CH}_3$ ), 1.87 (m, 1H,  $\text{CH}_2\text{CH}_3$ ), 4.21 (dd,  $J_1 = 7.96$  Hz,  $J_2 = 8.00$  Hz, 1H,  $\text{OCH}_2\text{CH}$ ), 4.46 (m, 1H,  $\text{OCH}_2\text{CH}$ ), 4.64 (dd,  $J_1 = 9.64$  Hz,  $J_2 = 8.00$  Hz, 1H,  $\text{OCH}_2\text{CH}$ ), 7.31 (m, 1H, *H in Benzene Ring*), 7.56-7.61 (m, 2H, *H in Benzene Ring*), 8.05 (d,  $J = 5.10$  Hz, 1H, *H in Pyridine Ring*), 8.16 (dd,  $J_1 = 7.92$  Hz,  $J_2 = 1.04$  Hz, 1H, *H in Benzene Ring*), 8.54 (d,  $J = 5.10$  Hz, 1H, *H in Pyridine Ring*), 10.4 (s, br, 1H, *NH*).

$^{13}\text{C}$  NMR (100 MHz,  $\text{CDCl}_3$ )  $\delta$  10.3, 28.9, 68.3, 72.1, 112.0, 117.0, 120.3, 121.3, 121.9, 128.9, 129.1, 129.9, 135.9, 138.7, 140.6, 163.1.

HRESI-MS: calcd for  $\text{C}_{16}\text{H}_{16}\text{N}_3\text{O}$   $[\text{M} + \text{H}]^+$ : 266.1293, found: 266.1576.

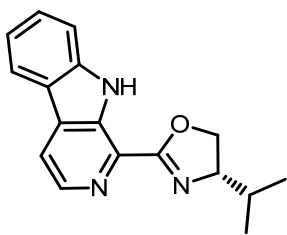

**L3** (S)-iPr-β<sup>1</sup>CarOx

**(S)-4-isopropyl-2-(9H-pyrido[3,4-b]indol-1-yl)-4,5-dihydrooxazole**

Pale yellow solid, <sup>1</sup>H-NMR (400 MHz, CDCl<sub>3</sub>) δ 1.03 (d, *J* = 6.72 Hz, 3H, CH(CH<sub>3</sub>)<sub>2</sub>), 1.14 (d, *J* = 6.72 Hz, 3H, CH(CH<sub>3</sub>)<sub>2</sub>), 1.97 (m, 1H, CH(CH<sub>3</sub>)<sub>2</sub>), 4.28-4.35 (m, 2H, OCH<sub>2</sub>CH), 4.59 (m, 1H, OCH<sub>2</sub>CH), 7.32 (m, 1H, *H* in Benzene Ring), 7.58-7.64 (m, 2H, *H* in Benzene Ring), 8.07 (d, *J* = 5.08 Hz, 1H, *H* in Pyridine Ring), 8.16 (d, *J* = 7.84 Hz, 1H, *H* in Benzene Ring), 8.55 (d, *J* = 5.08 Hz, 1H, *H* in Pyridine Ring), 10.37 (s, br, 1H, NH).

<sup>13</sup>C NMR (100 MHz, CDCl<sub>3</sub>) δ 18.5, 19.1, 33.1, 70.2, 72.9, 112.0, 117.0, 120.3, 121.4, 121.9, 128.9, 129.0, 129.9, 135.9, 138.7, 140.6.

HRESI-MS: calcd for C<sub>17</sub>H<sub>18</sub>N<sub>3</sub>O [M+ H]<sup>+</sup>: 280.1483, found: 280.1450.

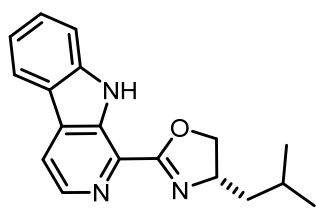

**L4** (S)-iBu-β<sup>1</sup>CarOx

**(S)-4-isobutyl-2-(9H-pyrido[3,4-b]indol-1-yl)-4,5-dihydrooxazole**

Pale yellow solid, <sup>1</sup>H-NMR (400 MHz, CDCl<sub>3</sub>) δ 1.06 (s, 6H, CH(CH<sub>3</sub>)<sub>2</sub>), 1.51 (m, 1H, CH(CH<sub>3</sub>)<sub>2</sub>), 1.82 (m, 1H, CH<sub>2</sub>CH(CH<sub>3</sub>)<sub>2</sub>), 1.93 (m, 1H, CH<sub>2</sub>CH(CH<sub>3</sub>)<sub>2</sub>), 4.14 (m, 1H, OCH<sub>2</sub>CH), 4.54 (m, 1H, OCH<sub>2</sub>CH), 4.66 (m, 1H, OCH<sub>2</sub>CH), 7.29 (m, 1H, *H* in Benzene Ring), 7.57-7.60 (m, 2H, *H* in Benzene Ring), 8.03 (d, *J* = 5.08 Hz, 1H, *H* in Pyridine

Ring), 8.13 (dd,  $J_1 = 7.84$  Hz,  $J_2 = 0.96$  Hz, 1H, *H* in Benzene Ring), 8.53 (d,  $J = 5.08$  Hz, 1H, *H* in Pyridine Ring), 10.34 (s, br, 1H, *NH*).

$^{13}\text{C}$  NMR (100 MHz,  $\text{CDCl}_3$ )  $\delta$  22.8, 22.9, 25.8, 45.8, 65.4, 73.0, 112.0, 116.9, 120.3, 121.3, 121.9, 128.9, 129.1, 129.9, 135.9, 138.7, 140.6, 162.9.

HRESI-MS: calcd for  $\text{C}_{18}\text{H}_{20}\text{N}_3\text{O}$   $[\text{M} + \text{H}]^+$ : 294.1606, found: 294.1610.

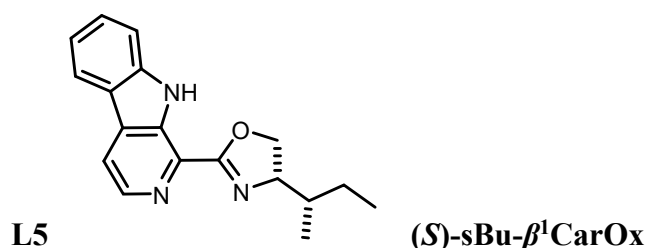

**(S)-4-((S)-sec-butyl)-2-(9H-pyrido[3,4-b]indol-1-yl)-4,5-dihydrooxazole**

Yellow wax,  $^1\text{H}$ -NMR (400 MHz,  $\text{CDCl}_3$ )  $\delta$  0.95 (d,  $J = 6.72$  Hz, 3H,  $\text{CH}_2\text{CH}_3$ ), 1.02 (t,  $J = 7.40$  Hz, 3H,  $\text{CH}_2\text{CH}_3$ ), 1.34 (m, 1H,  $\text{CHCH}_2\text{CH}_3$ ), 1.72 (m, 1H,  $\text{CHCH}_2\text{CH}_3$ ), 1.82 (m, 1H,  $\text{CHCH}_2\text{CH}_3$ ), 4.29 (dd,  $J_1 = 8.08$  Hz,  $J_2 = 8.08$  Hz, 1H,  $\text{OCH}_2\text{CH}$ ), 4.43 (m, 1H,  $\text{OCH}_2\text{CH}$ ), 4.56 (dd,  $J_1 = 9.48$  Hz,  $J_2 = 8.08$  Hz, 1H,  $\text{OCH}_2\text{CH}$ ), 7.31 (m, 1H, *H* in Benzene Ring), 7.56-7.61 (m, 2H, *H* in Benzene Ring), 8.04 (d,  $J = 5.08$  Hz, 1H, *H* in Pyridine Ring), 8.14 (d,  $J_1 = 7.20$  Hz, 1H, *H* in Benzene Ring), 8.53 (d,  $J = 5.08$  Hz, 1H, *H* in Pyridine Ring), 10.36 (s, br, 1H, *NH*).

$^{13}\text{C}$  NMR (100 MHz,  $\text{CDCl}_3$ )  $\delta$  11.7, 14.6, 26.3, 39.4, 69.7, 71.5, 112.0, 117.0, 120.3, 121.3, 121.9, 128.9, 129.0, 129.9, 135.9, 138.7, 140.6, 163.0.

HRESI-MS: calcd for  $\text{C}_{18}\text{H}_{20}\text{N}_3\text{O}$   $[\text{M} + \text{H}]^+$ : 294.1606, found: 294.1611.

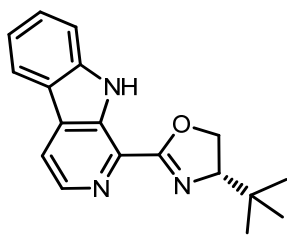

**L6** **(S)-tBu-β<sup>1</sup>CarOx**

**(S)-4-(tert-butyl)-2-(9H-pyrido[3,4-b]indol-1-yl)-4,5-dihydrooxazole**

White solid, <sup>1</sup>H-NMR (400 MHz, CDCl<sub>3</sub>) δ 1.05 (s, 9H, C(CH<sub>3</sub>)<sub>3</sub>), 4.28 (dd, *J*<sub>1</sub> = 10.00 Hz, *J*<sub>2</sub> = 7.92 Hz, 1H, OCH<sub>2</sub>CH), 4.40 (dd, *J*<sub>1</sub> = 8.48 Hz, *J*<sub>2</sub> = 7.92 Hz, 1H, OCH<sub>2</sub>CH), 4.53 (dd, *J*<sub>1</sub> = 10.00 Hz, *J*<sub>2</sub> = 8.48 Hz, 1H, OCH<sub>2</sub>CH), 7.32 (m, 1H, *H* in Benzene Ring), 7.59-7.60 (m, 2H, *H* in Benzene Ring), 8.07 (d, *J* = 5.08 Hz, 1H, *H* in Pyridine Ring), 8.16 (d, *J* = 7.88 Hz, 1H, *H* in Benzene Ring), 8.55 (d, *J* = 5.08 Hz, 1H, *H* in Pyridine Ring), 10.37 (s, br, 1H, NH).

<sup>13</sup>C NMR (100 MHz, CDCl<sub>3</sub>) δ 26.1 (3C), 34.1, 68.7, 76.4, 112.0, 117.0, 120.4, 121.4, 122.0, 128.9, 129.0, 129.9, 136.0, 138.7, 140.6, 163.1.

HRESI-MS: calcd for C<sub>18</sub>H<sub>20</sub>N<sub>3</sub>O [M+ H]<sup>+</sup>: 294.1606, found: 294.1606.

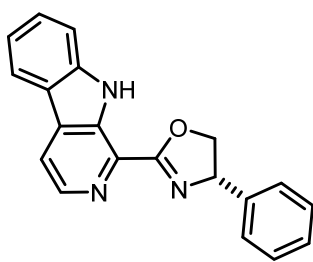

**L7** **(S)-Ph-β<sup>1</sup>CarOx**

**(S)-4-phenyl-2-(9H-pyrido[3,4-b]indol-1-yl)-4,5-dihydrooxazole**

Pale yellow solid, <sup>1</sup>H-NMR (400 MHz, CDCl<sub>3</sub>) δ 4.43 (dd, *J*<sub>1</sub> = 8.48 Hz, *J*<sub>2</sub> = 8.44 Hz, 1H, OCH<sub>2</sub>CH), 4.97 (dd, *J*<sub>1</sub> = 10.08 Hz, *J*<sub>2</sub> = 8.44 Hz, 1H, OCH<sub>2</sub>CH), 5.61 (*J*<sub>1</sub> = 10.08 Hz, *J*<sub>2</sub> = 8.48 Hz, 1H, OCH<sub>2</sub>CH), 7.28-7.38 (m, 2H, *H* in Benzene Ring), 7.38-7.48 (m, 4H, *H* in Benzene Ring), 7.55 (m, 2H, *H* in Benzene Ring), 8.07 (d, *J* = 5.08 Hz, 1H, *H*

in Pyridine Ring), 8.16 (d,  $J = 7.88$  Hz, 1H,  $H$  in Benzene Ring), 8.55 (d,  $J = 5.08$  Hz, 1H,  $H$  in Pyridine Ring), 10.37 (s, br, 1H,  $NH$ ).

$^{13}\text{C}$  NMR (100 MHz,  $\text{CDCl}_3$ )  $\delta$  70.4, 74.8, 112.0, 117.3, 120.4, 121.3, 121.9, 126.9 (2C), 128.0, 128.6, 129.0 (2C), 129.1, 130.1, 136.1, 138.8, 140.6, 142.2, 164.5.

HRESI-MS: calcd for  $\text{C}_{20}\text{H}_{16}\text{N}_3\text{O}$   $[\text{M}+\text{H}]^+$ : 314.1293, found: 314.1869.

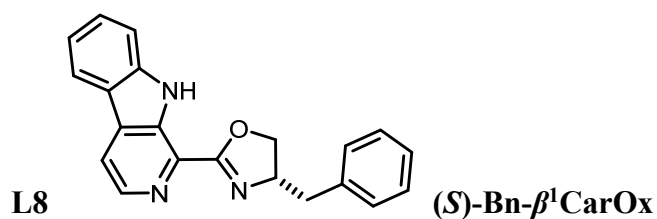

**(S)-4-benzyl-2-(9H-pyrido[3,4-b]indol-1-yl)-4,5-dihydrooxazole**

Yellow oil,  $^1\text{H}$ -NMR (400 MHz,  $\text{CDCl}_3$ )  $\delta$  2.92 (dd,  $J_1 = 13.60$  Hz,  $J_2 = 7.96$  Hz, 1H,  $\text{CH}_2\text{Ph}$ ), 3.25 (dd,  $J_1 = 13.60$  Hz,  $J_2 = 6.56$  Hz, 1H,  $\text{CH}_2\text{Ph}$ ), 4.32 (dd,  $J_1 = 7.84$  Hz,  $J_2 = 8.04$  Hz, 1H), 4.57 (dd,  $J_1 = 9.12$  Hz,  $J_2 = 8.04$  Hz, 1H), 4.79 (m, 1H), 7.29-7.35 (m, 4H,  $H$  in Benzene Ring), 7.35-7.39 (m, 2H,  $H$  in Benzene Ring), 7.55-7.62 (m, 2H,  $H$  in Benzene Ring), 8.07 (d,  $J = 5.08$  Hz, 1H,  $H$  in Pyridine Ring), 8.16 (d,  $J = 7.88$  Hz, 1H,  $H$  in Benzene Ring), 8.55 (d,  $J = 5.08$  Hz, 1H,  $H$  in Pyridine Ring), 10.34 (s, br, 1H,  $NH$ ).

$^{13}\text{C}$  NMR (125 MHz,  $\text{CDCl}_3$ )  $\delta$  42.4, 68.2, 72.1, 111.9, 117.1, 120.4, 121.3, 122.0, 126.7, 128.7, 128.9, 129.0, 129.3, 130.0, 136.0, 138.1, 138.7, 140.7, 163.6.

HRESI-MS: calcd for  $\text{C}_{21}\text{H}_{18}\text{N}_3\text{O}$   $[\text{M}+\text{H}]^+$ : 328.1450, found: 328.1448.

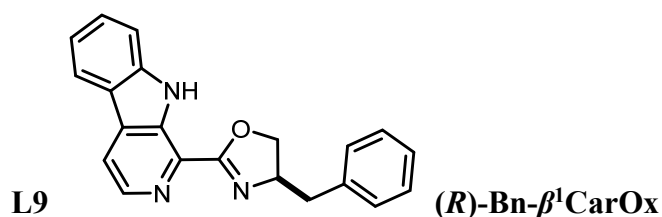

### (R)-4-benzyl-2-(9H-pyrido[3,4-b]indol-1-yl)-4,5-dihydrooxazole

Yellow oil,  $^1\text{H-NMR}$  (400 MHz,  $\text{CDCl}_3$ )  $\delta$  2.92 (dd,  $J_1 = 13.60$  Hz,  $J_2 = 7.96$  Hz, 1H,  $\text{CH}_2\text{Ph}$ ), 3.25 (dd,  $J_1 = 13.60$  Hz,  $J_2 = 6.56$  Hz, 1H,  $\text{CH}_2\text{Ph}$ ), 4.32 (dd,  $J_1 = 7.84$  Hz,  $J_2 = 8.04$  Hz, 1H), 4.56 (dd,  $J_1 = 9.12$  Hz,  $J_2 = 8.04$  Hz, 1H), 4.78 (m, 1H), 7.27-7.35 (m, 4H,  $H$  in Benzene Ring), 7.35-7.40 (m, 2H,  $H$  in Benzene Ring), 7.54-7.63 (m, 2H,  $H$  in Benzene Ring), 8.07 (d,  $J = 5.08$  Hz, 1H,  $H$  in Pyridine Ring), 8.17 (dd,  $J_1 = 7.08$  Hz,  $J_2 = 1.08$  Hz, 1H,  $H$  in Benzene Ring), 8.55 (d,  $J = 5.08$  Hz, 1H,  $H$  in Pyridine Ring), 10.34 (s, br, 1H,  $\text{NH}$ ).

$^{13}\text{C NMR}$  (100125 MHz,  $\text{CDCl}_3$ )  $\delta$  42.3, 68.2, 72.1, 111.9, 117.1, 120.4, 121.3, 122.0, 126.7, 128.7, 128.9, 129.0, 129.3, 130.0, 136.0, 138.1, 138.7, 140.7, 163.6.

HRESI-MS: calcd for  $\text{C}_{21}\text{H}_{18}\text{N}_3\text{O}$   $[\text{M}+\text{H}]^+$ : 328.1450, found: 328.1448.

## Synthesis and Structural Elucidation of $\beta^3$ -CarOx Ligands

### Synthetic Route to the Chiral $\beta^3$ -CarOx Ligands

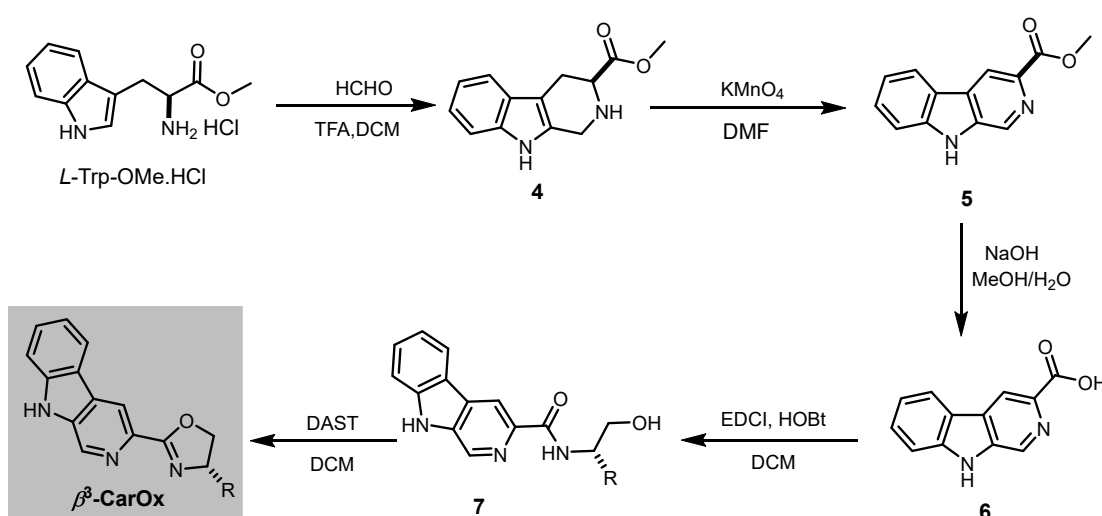

**Step 1**, To a stirred suspension of  $L$ -Tryptophan methyl ester hydrochloride (5.1 g, 20



mmol) and 37% formalin (40 mL) was added anhydrous dichloromethane. Trifluoroacetic acid (TFA) (3.26 mL) was added dropwise at 0 °C. The reaction mixture was stirred until the full consumption of the starting material detected by TLC. The mixture was quenched by the addition of 10% aqueous potassium carbonate solution (20 mL). The water phase was extracted with ethyl acetate (20 mL × 3), dried over anhydrous sodium sulfate, and concentrated under vacuum. This crude (*S*)- $\beta$ -1,2,3,4-tetrahydrocarboline-3-carboxylic acid methyl ester **4** (91% yield) was used for the next step without further purification.

**Step 2**, To a stirred solution of (*S*)- $\beta$ -1,2,3,4-tetrahydrocarboline-3-carboxylic acid methyl ester **4** (4.6 g, 20 mmol) in DMF (60 mL) was added potassium permanganate (KMnO<sub>4</sub>) (2.3 g, 20 mmol) in portions while the mixture was in an ice bath. The reaction mixture was stirred vigorously and allowed to gradually warm to room temperature until the full consumption of the starting material was detected by TLC. The heterogeneous mixture was filtered and rinsed with distilled methanol. The  $\beta$ -carboline-3-carboxylic acid methyl ester, compound **5**, was collected as yellow solid in 62% yield (2.8 g). Compound **5** was used for the next step without further purification.

**Step 3**, To a stirred suspension of  $\beta$ -carboline-3-carboxylic acid methyl ester **5** (2.80 g, 12 mmol) was added methanol (30 mL). Aqueous sodium hydroxide solution (12 mL, 1 M) was added dropwise at 0 °C. The heterogeneous mixture was immersed in a preheated oil bath (50 °C) and stirred until the full consumption of the starting material was detected by TLC. The mixture was concentrated under vacuum to remove methanol and was adjusted to pH 6-7 with hydrochloric acid to precipitate the desired product, the heterogeneous mixture was filtered to give  $\beta$ -carboline-1-carboxylic acid intermediate **6** as yellow solid in 92% yield (2.34 g). This intermediate was used for the next step without further purification.

**Step 4**, *General procedure for Steglich Condensation*: To a dried Schlenk flask charged with the synthesized  $\beta$ -carboline-3-carboxylic acid, compound **6**, (1 mmol, 212 mg) and the specific chiral amino alcohol (1 mmol), was added anhydrous dichloromethane (5 mL) for dissolution. Hydroxybenzotriazole (HOBt) (175 mg, 1.3

mmol) and *N*-(3-(dimethyl amino)propyl)-*N'*-ethylcarbodiimide hydrochloride (EDCI-HCl) (0.25 g, 1.3 mmol) were then added while the reaction flask was in an ice bath. The mixture was allowed to gradually warm to room temperature, and it was stirred overnight until full consumption of the carboxylic acid was detected by thin layer chromatography (TLC). The mixture was quenched by the addition of a saturated aqueous solution of NaHCO<sub>3</sub> (20 mL) and separated. The water phase was extracted with dichloromethane (10 mL × 3), and the combined organic phase was sequentially washed with water (10 mL × 2) and saturated aqueous NaCl (10 mL), dried over anhydrous sodium sulfate, and concentrated under vacuum. Purification by silica gel column chromatography on silica gel (200-300m) with hexane/EtOAc (2:1, v/v) as the eluent gave the amide intermediate **7**.

Yields for the intermediate **7** are listed below,

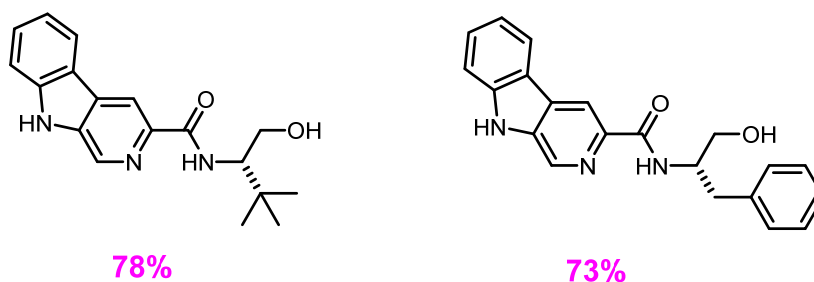

**Step 4**, General procedure for the DAST mediated cyclization to produce  $\beta^3$ -CarOx Ligand: To a Schlenk tube charged the amide intermediate **7** (1.0 mmol) was added anhydrous DCM (5.0 mL) under N<sub>2</sub> atmosphere. Diethylaminosulfur trifluoride (DAST) (160 mg, 1mmol) was added dropwise at -78 °C until the full consumption of the starting material was detected by TLC. The mixture was quenched by the addition of a saturated aqueous solution of NaHCO<sub>3</sub> (10 mL) and separated, The water phase was extracted with dichloromethane (10 mL × 3), and the combined organic phase was sequentially washed with water (10 mL × 2) and saturated aqueous NaCl (10 mL), dried over anhydrous sodium sulfate, and concentrated under vacuum. Purification by silica gel column chromatography on silica gel (200-300m) with hexane/EtOAc (2:1, v/v) as the eluent gave the product  $\beta^3$ -CarOx Ligand.

Yields for  $\beta^3$ -CarOx ligands are listed below,

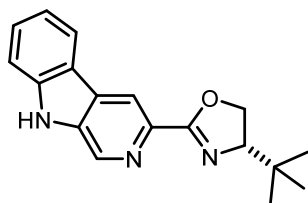

**L10: (S)-tBu-β<sup>3</sup>CarOx**

**72%**

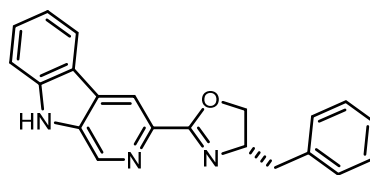

**L11: (S)-Bn-β<sup>3</sup>CarOx**

**67%**

### Characterization of the Synthesized Chiral β<sup>3</sup>-CarOx Ligands

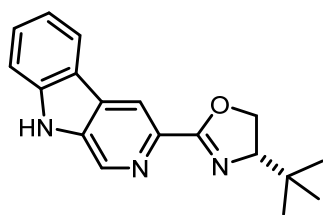

**L10 (S)-tBu-β<sup>3</sup>CarOx**

#### **(S)-4-(tert-butyl)-2-(9H-pyrido[3,4-b]indol-3-yl)-4,5-dihydrooxazole**

White solid, <sup>1</sup>H-NMR (500MHz, CDCl<sub>3</sub>) δ 1.00 (s, 9H, C(CH<sub>3</sub>)<sub>3</sub>), 4.18 (dd, *J*<sub>1</sub> = 10.05 Hz, *J*<sub>2</sub> = 8.05 Hz, 1H, OCH<sub>2</sub>CH), 4.36 (t, *J* = 8.25 Hz, 1H, OCH<sub>2</sub>CH), 4.50 (dd, *J*<sub>1</sub> = 9.95 Hz, *J*<sub>2</sub> = 8.40 Hz, 1H, OCH<sub>2</sub>CH), 7.31 (m, 1H, *H* in Benzene Ring), 7.53-7.56 (m, 2H, *H* in Benzene Ring), 8.14 (d, *J* = 9.90Hz, 1H, *H* in Benzene Ring), 8.78 (s, 1H, *H* in Pyridine Ring), 8.94 (s, 1H, *H* in Pyridine Ring), 9.75 (s, br, 1H, NH).

<sup>13</sup>C-NMR (125 MHz, CDCl<sub>3</sub>) δ 26.0, 34.1, 63.3, 76.4, 112.0, 116.2, 120.6, 121.5, 122.0, 128.9, 129.1, 133.3, 136.1, 136.9, 140.9, 163.3.

HRESI-MS: calcd for C<sub>18</sub>H<sub>20</sub>N<sub>3</sub>O [M+ H]<sup>+</sup>: 294.1606, found: 294.1606.

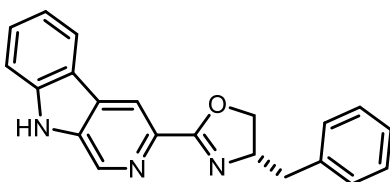

**L11 (S)-Bn-β<sup>3</sup>CarOx**

#### **(S)-4- Benzyl-2-(9H-pyrido[3,4-b]indol-3-yl)-4,5-dihydrooxazole**

White solid, <sup>1</sup>H-NMR (500 MHz, CDCl<sub>3</sub>) δ 2.80 (dd, *J*<sub>1</sub> = 9.15 Hz, *J*<sub>2</sub> = 13, 85 Hz, 1H,

*CH*<sub>2</sub>Ph), 3.34 (dd, *J*<sub>1</sub> = 5.05 Hz, *J*<sub>2</sub> = 13.80 Hz, 1H, *CH*<sub>2</sub>Ph), 4.28 (t, *J* = 7.95 Hz, 1H), 4.49 (t, *J* = 9.25 Hz, 1H), 4.73 (m, 1H), 7.17-7.20 (s, 1H, *H* in Benzene Ring), 7.25-7.32 (m, 5H, *H* in Benzene Ring), 7.52-7.56 (m, 2H, *H* in Benzene Ring), 8.12 (d, *J* = 7.90 Hz, 1H, *H* in Benzene Ring), 8.78 (s, 1H, *H* in Pyridine Ring), 8.98 (s, 1H, *H* in Pyridine Ring), 10.20 (s, br, 1H, *NH*).

<sup>13</sup>H-NMR (125 MHz, CDCl<sub>3</sub>) δ 42.0, 68.0, 72.5, 112.1, 116.2, 120.5, 121.5, 121.9, 126.6, 128.6, 128.8, 129.0, 129.2, 133.6, 135.7, 137.1, 137.9, 141.4, 164.4.

HRESI-MS: calcd for C<sub>21</sub>H<sub>18</sub>N<sub>3</sub>O [M+H]<sup>+</sup>: 328.1451, found: 328.1349.

### Enantioselective Michael Addition of Arylboronic Acids to Nitroalkenes:

#### General procedure

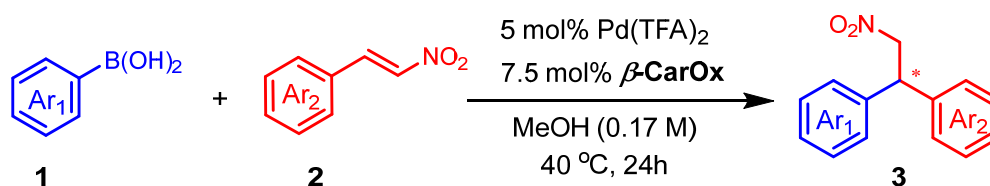

To a Schlenk tube charged Pd(TFA)<sub>2</sub> (4.15 mg, 0.0125 mmol) and the specific chiral  $\beta$ -CarOx ligand (0.01875 mmol) was added MeOH (1.0 mL) under N<sub>2</sub> atmosphere. The mixture was stirred at 40 °C for 0.5 h to afford the catalyst solution.

To the above solution was added nitrostyrene **1** (0.25 mmol) and aryl boronic acid **2** (0.375 mmol). The wall of the tube was rinsed with MeOH (0.5 mL) or some oil substrate was dissolved in MeOH (0.5 mL) (The volume of solvent is 1.5 mL). The tube was placed in the modules of the reactor which was set at 40 °C. After stirring for 24 h, the reaction mixture was cooled to room temperature, and the solvent was removed by

rotary evaporation. The residue was purified by column chromatography (petroleum/ether/EtOAc = 20/1, v/v) to give the product.

2-(isoquinolin-3-yl)-4,5-dihydrooxazole was utilized as a ligand for the preparation of the racemic products.

### Optimization of the Reaction Conditions

Table 1. Optimization of the Reaction Conditions <sup>a</sup>

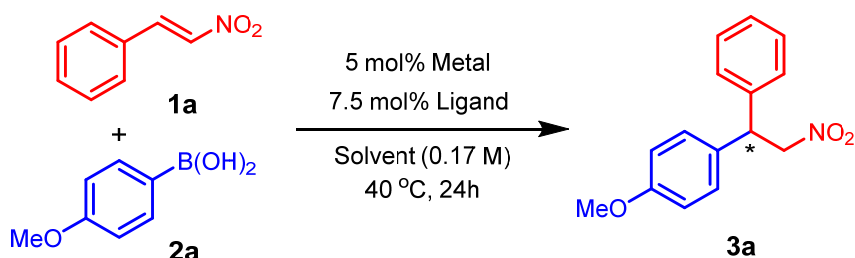

| Entry | Metal                | Ligand          | Solvent            | Isolated Yield (%) <sup>b</sup> | ee (%) <sup>c</sup> |
|-------|----------------------|-----------------|--------------------|---------------------------------|---------------------|
| 1     | Pd(TFA) <sub>2</sub> | L <sub>1</sub>  | MeOH               | 81                              | 80 ( <i>S</i> )     |
| 2     | Pd(TFA) <sub>2</sub> | L <sub>2</sub>  | MeOH               | 82                              | 86 ( <i>S</i> )     |
| 3     | Pd(TFA) <sub>2</sub> | L <sub>3</sub>  | MeOH               | 88                              | 89 ( <i>S</i> )     |
| 4     | Pd(TFA) <sub>2</sub> | L <sub>4</sub>  | MeOH               | 78                              | 87 ( <i>S</i> )     |
| 5     | Pd(TFA) <sub>2</sub> | L <sub>5</sub>  | MeOH               | 78                              | 87 ( <i>S</i> )     |
| 6     | Pd(TFA) <sub>2</sub> | L <sub>6</sub>  | MeOH               | 92                              | 95 ( <i>S</i> )     |
| 7     | Pd(TFA) <sub>2</sub> | L <sub>7</sub>  | MeOH               | 86                              | 85 ( <i>S</i> )     |
| 8     | Pd(TFA) <sub>2</sub> | L <sub>8</sub>  | MeOH               | 84                              | 89 ( <i>S</i> )     |
| 9     | Pd(TFA) <sub>2</sub> | L <sub>9</sub>  | MeOH               | 81                              | 88 ( <i>R</i> )     |
| 10    | Pd(TFA) <sub>2</sub> | L <sub>10</sub> | MeOH               | 89                              | 80 ( <i>S</i> )     |
| 11    | Pd(TFA) <sub>2</sub> | L <sub>11</sub> | MeOH               | 85                              | 73 ( <i>S</i> )     |
| 12    | Pd(OAc) <sub>2</sub> | L <sub>6</sub>  | MeOH               | 49                              | 83 ( <i>S</i> )     |
| 13    | PdCl <sub>2</sub>    | L <sub>6</sub>  | MeOH               | <5                              | n.d.                |
| 14    | Pd(TFA) <sub>2</sub> | L <sub>6</sub>  | EtOH               | 82                              | 92 ( <i>S</i> )     |
| 15    | Pd(TFA) <sub>2</sub> | L <sub>6</sub>  | <sup>i</sup> Pr-OH | 51                              | 73 ( <i>S</i> )     |
| 16    | Pd(TFA) <sub>2</sub> | L <sub>6</sub>  | <sup>t</sup> Bu-OH | 64                              | 75 ( <i>S</i> )     |
| 17    | Pd(TFA) <sub>2</sub> | L <sub>6</sub>  | 2-Methyl-2-butanol | 58                              | 66 ( <i>S</i> )     |
| 18    | Pd(TFA) <sub>2</sub> | L <sub>6</sub>  | TFE                | 51                              | 71 ( <i>S</i> )     |

<sup>a</sup>, unless otherwise mentioned, reactions were carried out on a 0.25 mmol of 2a, 0.375 mmol of *para*-MeO-C<sub>6</sub>H<sub>4</sub>B(OH)<sub>2</sub> using 5 mol % Pd(TFA)<sub>2</sub> and 7.5 mol % ligand in 1.5 mL solvent at 40 °C for 24 h under N<sub>2</sub> atmosphere.

<sup>b</sup>, Isolated yield. <sup>c</sup>, Determined by HPLC using a Daicel column (OD-H). The absolute configuration was assigned by comparing the retention time of 3aa with that reported in the literature.<sup>[3]</sup> n.d. = not determined.

## Substrate Scope

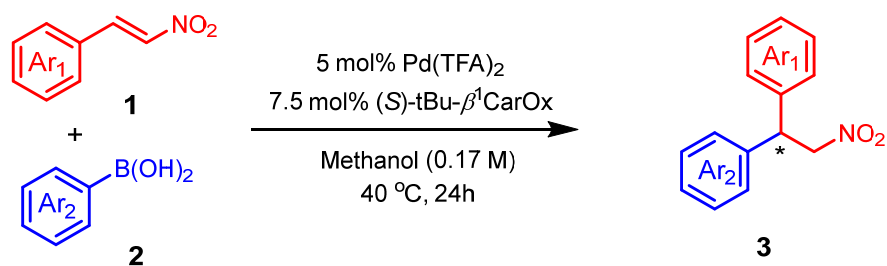

### NOTE:

The *nitroalkenes* and *arylboronic acids* were highlighted by red and blue, respectively.

Data marked (CC) means that they were reported in “*Chem. Commun.* 2019, 55, 5902-5905.”<sup>[4]</sup>

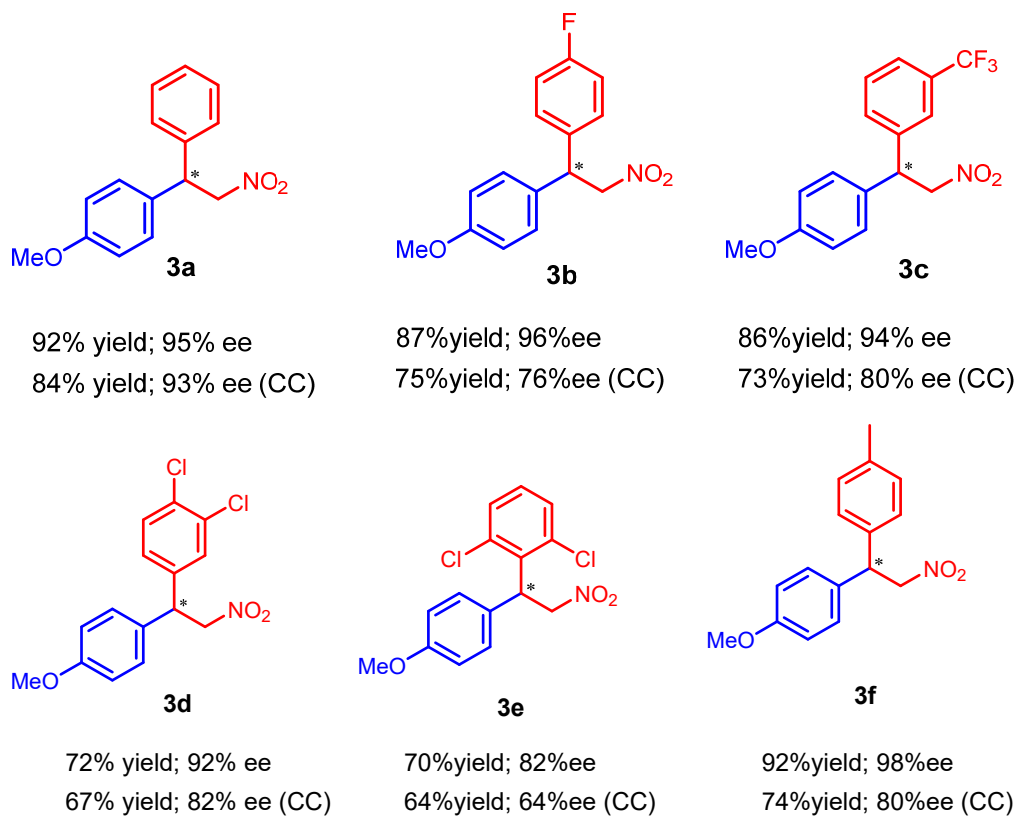

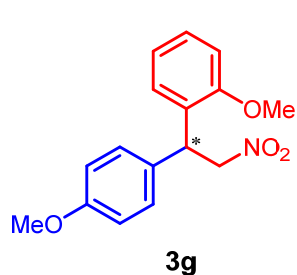

94% yield; 96% ee  
70% yield; 87% ee (CC)

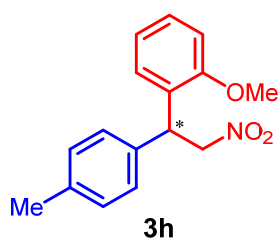

81% yield; 89% ee

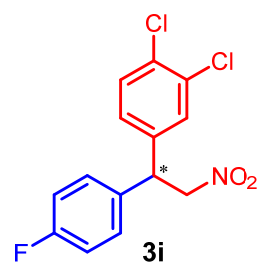

63% yield; 74% ee

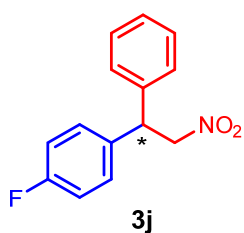

70% yield; 73% ee  
65% yield; 77% ee (CC)

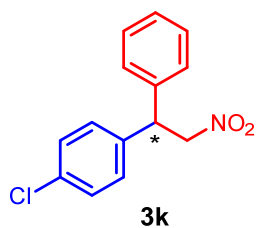

72% yield; 62% ee  
65% yield; 70% ee (CC)

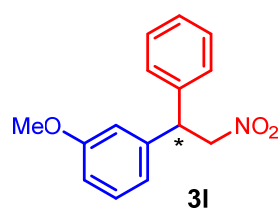

78% yield; 80% ee  
71% yield; 82% ee (CC)

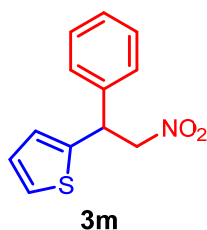

<5% yield; n.d.

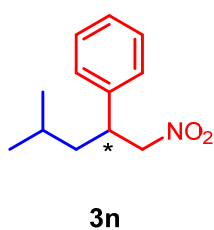

<5% yield; n.d.

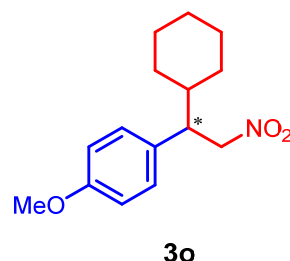

<5% yield; n.d.

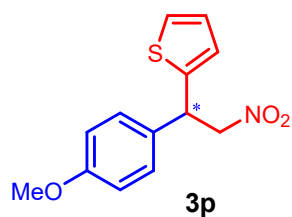

62% yield; 86% ee  
57% yield; 84% ee (CC)

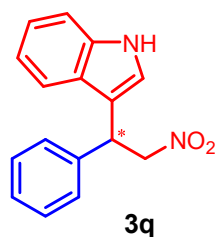

60% yield; 61% ee

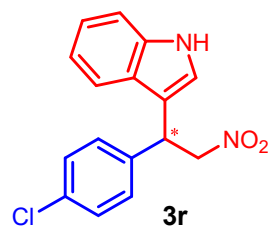

60% yield; 71% ee

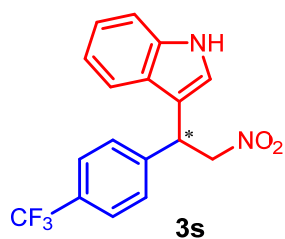

57% yield; 83% ee

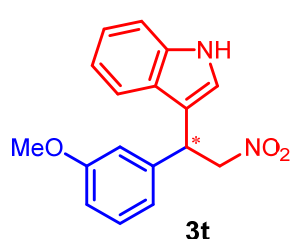

58% yield; 63% ee.

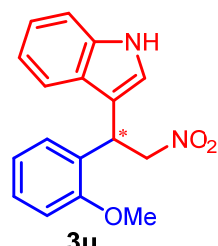

48% yield; 90% ee.

## HPLC traces of the Enantioenriched $\beta$ -aryl nitroethanes

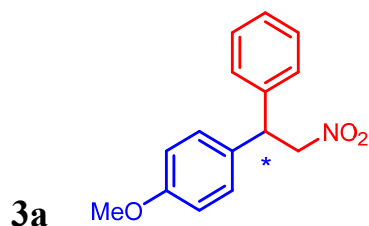

Colorless oil, 92% yield.

The NMR data is in accordance with that of previous publications.<sup>[4-7]</sup>

<sup>1</sup>H NMR (400 MHz, CDCl<sub>3</sub>),  $\delta$  3.78 (s, 3H, OCH<sub>3</sub>), 4.86 (m, 1H), 4.94-4.96 (m, 2H), 6.84-6.87(m, 2H, Aromatic H), 7.13-7.18 (m, 2H, Aromatic H), 7.20-7.24 (m, 2H, Aromatic H), 7.26 (m, 1H, Aromatic H), 7.29-7.36 (m, 2H, Aromatic H).

HPLC trace:

Daicel chiralcel OD-H, hexane/i-PrOH = 80/20, 220 nm, 1.0 mL/min.

$t_{R1} = 23.4$  min (major),  $t_{R2} = 25.5$  min (minor)];

ee = 95.3%.

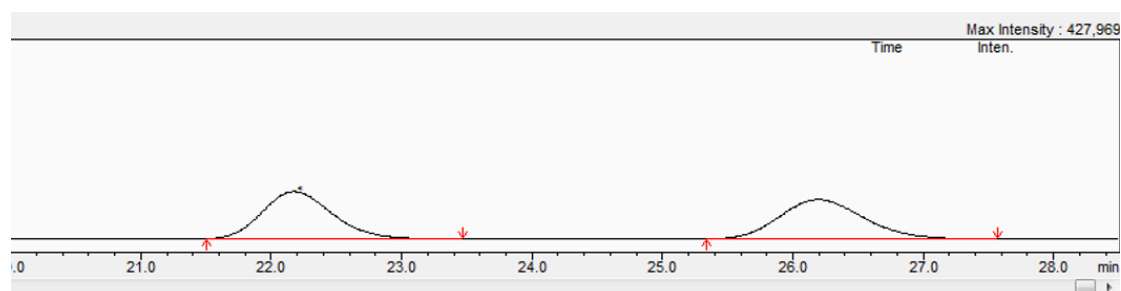

结果视图 - 峰表

| 峰号 | 保留时间   | 面积       | 高度     | 标记 | 浓度      | 浓度单位 | 化合物ID号 | 化合物名 | 面积%     |
|----|--------|----------|--------|----|---------|------|--------|------|---------|
| 1  | 22.175 | 16152794 | 430438 | M  | 49.894  |      |        |      | 49.894  |
| 2  | 26.196 | 16221378 | 358713 | M  | 50.106  |      |        |      | 50.106  |
| 总计 |        | 32374172 | 789151 |    | 100.000 |      |        |      | 100.000 |

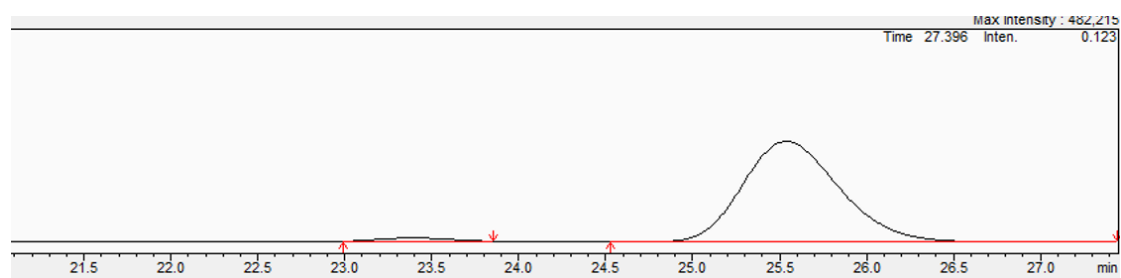

结果视图 - 峰表

| 峰号 | 保留时间   | 面积       | 高度     | 标记 | 浓度      | 浓度单位 | 化合物ID号 | 化合物名 | 面积%     |
|----|--------|----------|--------|----|---------|------|--------|------|---------|
| 1  | 23.393 | 453753   | 16200  | M  | 2.375   |      |        |      | 2.375   |
| 2  | 25.538 | 18648163 | 482200 |    | 97.625  |      |        |      | 97.625  |
| 总计 |        | 19101915 | 498401 |    | 100.000 |      |        |      | 100.000 |



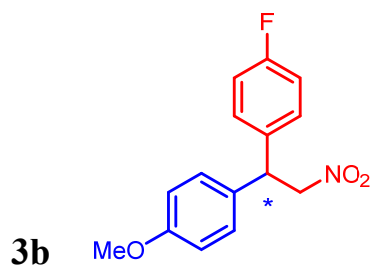

Colorless oil, 87% yield.

The NMR data is in accordance with that of previous publications.<sup>[4-5]</sup>

<sup>1</sup>H NMR (400 MHz, CDCl<sub>3</sub>), δ 3.78 (s, 3H, OCH<sub>3</sub>), 4.84 (m, 1H), 4.89-4.94 (m, 2H), 6.84-6.89 (m, 2H, Aromatic H), 6.99-7.04 (m, 2H, Aromatic H), 7.10-7.15 (m, 2H, Aromatic H), 7.17-7.21 (m, 2H, Aromatic H).

HPLC trace:

Daicel chiralcel OD-H, hexane/i-PrOH = 60/40, 220 nm, 1.0 mL/min.

tr<sub>1</sub> = 28.0 min (major), tr<sub>2</sub> = 35.7 min (minor)

ee = 96.2%.

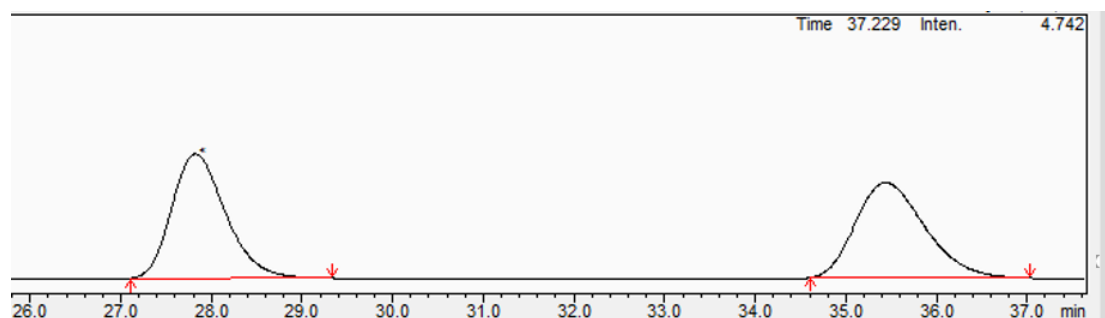

结果视图 - 峰表

| 峰号 | 保留时间   | 面积        | 高度      | 标记 | 浓度      | 浓度单位 | 化合物ID号 | 化合物名 | 面积%     |
|----|--------|-----------|---------|----|---------|------|--------|------|---------|
| 1  | 27.822 | 66747221  | 1619743 | M  | 50.225  |      |        |      | 50.225  |
| 2  | 35.439 | 66150033  | 1240699 | M  | 49.775  |      |        |      | 49.775  |
| 总计 |        | 132897254 | 2860442 |    | 100.000 |      |        |      | 100.000 |

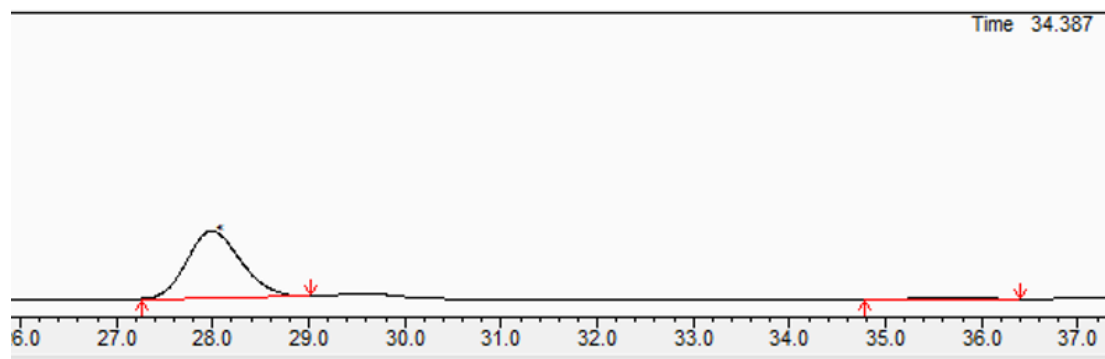

| 峰号 | 保留时间   | 面积       | 高度     | 标记 | 浓度      | 浓度单位 | 化合物ID号 | 化合物名 | 面积%     |
|----|--------|----------|--------|----|---------|------|--------|------|---------|
| 1  | 27.991 | 14909476 | 379895 | M  | 98.097  |      |        |      | 98.097  |
| 2  | 35.691 | 269180   | 6290   | M  | 1.903   |      |        |      | 1.903   |
| 总计 |        | 15198657 | 386185 |    | 100.000 |      |        |      | 100.000 |

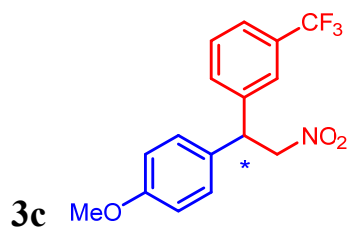

Colorless oil, 86% yield.

The NMR data is in accordance with that of previous publication.<sup>[4]</sup>

<sup>1</sup>H NMR (400 MHz, CDCl<sub>3</sub>),  $\delta$  3.79 (s, 3H, OCH<sub>3</sub>), 4.92 (m, 1H), 4.95-5.00 (m, 2H), 6.86-6.91 (m, 2H, Aromatic H), 7.12-7.16 (m, 2H, Aromatic H), 7.41-7.50 (m, 3H, Aromatic H), 7.53 (d,  $J = 7.16$  Hz, 1H, Aromatic H).

HPLC trace:

Daicel chiralcel OD-H, hexane/i-PrOH = 60/40, 220 nm, 1.0 mL/min.

$t_{R1} = 19.7$  min (major),  $t_{R2} = 23.3$  min (minor)

ee = 94.4%.

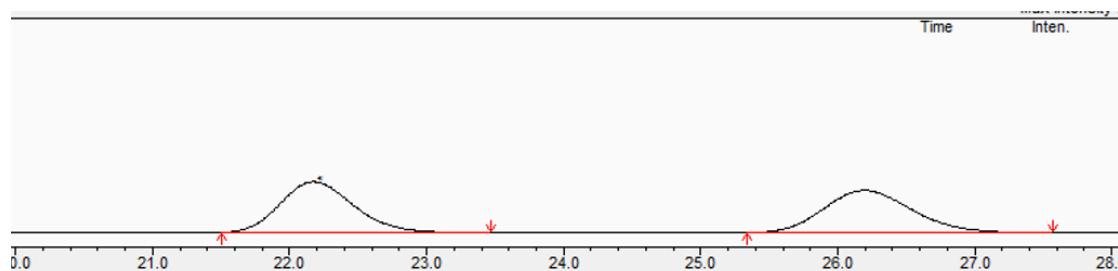

结果视图 - 峰表

| 峰号 | 保留时间   | 面积       | 高度     | 标记 | 浓度      | 浓度单位 | 化合物ID号 | 化合物名 | 面积%     |
|----|--------|----------|--------|----|---------|------|--------|------|---------|
| 1  | 22.175 | 16152794 | 430438 | M  | 49.894  |      |        |      | 49.894  |
| 2  | 26.196 | 16221378 | 358713 | M  | 50.106  |      |        |      | 50.106  |
| 总计 |        | 32374172 | 789151 |    | 100.000 |      |        |      | 100.000 |

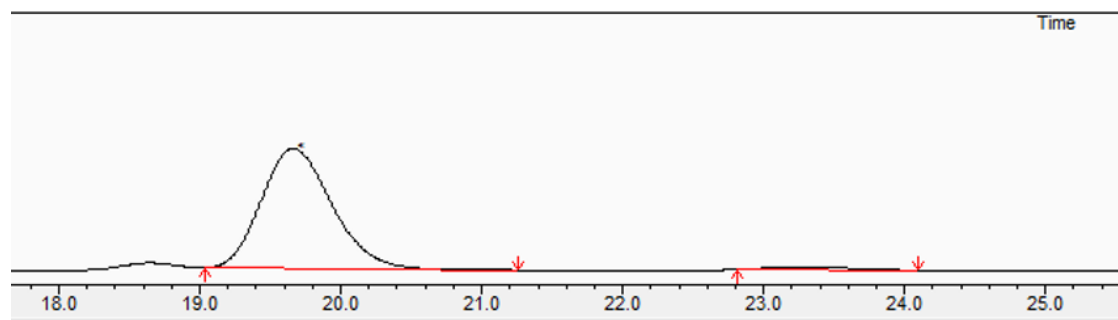

结果视图 - 峰表

| 峰号 | 保留时间   | 面积       | 高度     | 标记 | 浓度      | 浓度单位 | 化合物ID号 | 化合物名 | 面积%     |
|----|--------|----------|--------|----|---------|------|--------|------|---------|
| 1  | 19.663 | 26903411 | 775608 | M  | 97.191  |      |        |      | 97.191  |
| 2  | 23.274 | 777493   | 21148  | M  | 2.809   |      |        |      | 2.809   |
| 总计 |        | 27680904 | 796756 |    | 100.000 |      |        |      | 100.000 |

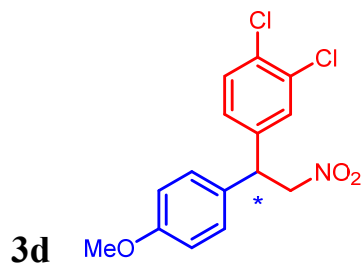

Colorless oil, 72% yield.

The NMR data is in accordance with that of previous publication.<sup>[4]</sup>

<sup>1</sup>H NMR (400 MHz, CDCl<sub>3</sub>),  $\delta$  3.79 (s, 3H, OCH<sub>3</sub>), 4.82 (dd,  $J_1 = 8.76$  Hz,  $J_2 = 7.20$  Hz, 1H), 4.92-4.95 (m, 2H), 6.85-6.89 (m, 2H, Aromatic H), 7.08 (dd,  $J_1 = 8.36$  Hz,  $J_2 = 2.24$  Hz, 1H), 7.09-7.13 (m, 2H, Aromatic H), 7.31 (d,  $J = 2.2$  Hz, 1H, Aromatic H), 7.40 (d,  $J = 8.28$  Hz, 1H, Aromatic H).

HPLC trace:

Daicel chiralcel OD-H, hexane/*i*-PrOH = 70/30, 220 nm, 0.8 mL/min.

$t_{R1} = 35.2$  min (major),  $t_{R2} = 37.1$  min (minor);

ee = 92.4%.

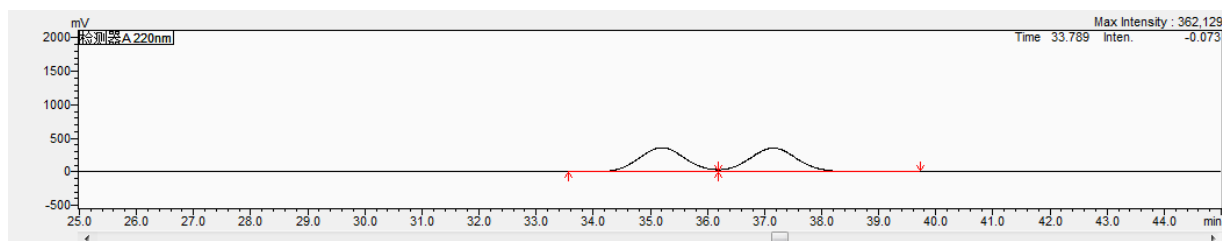

结果视图 - 峰表

| 峰号 | 保留时间   | 面积       | 高度     | 标记 | 浓度      | 浓度单位 | 化合物ID号 | 化合物名 | 面积%     |
|----|--------|----------|--------|----|---------|------|--------|------|---------|
| 1  | 35.203 | 20575586 | 362337 |    | 49.644  |      |        |      | 49.644  |
| 2  | 37.152 | 20870408 | 355969 | V  | 50.356  |      |        |      | 50.356  |
| 总计 |        | 41445994 | 718306 |    | 100.000 |      |        |      | 100.000 |

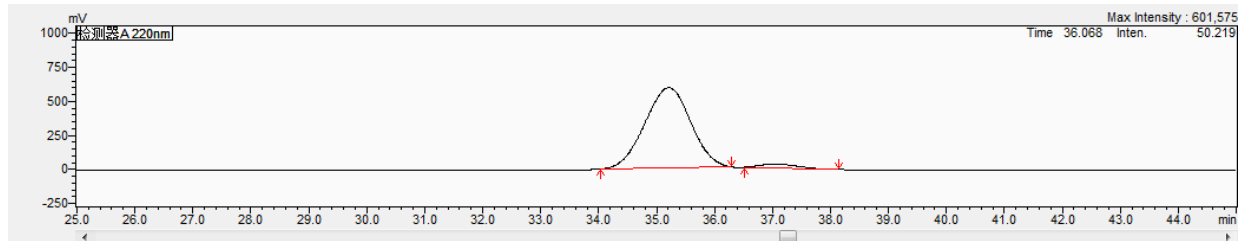

结果视图 - 峰表

| 峰号 | 保留时间   | 面积       | 高度     | 标记 | 浓度      | 浓度单位 | 化合物ID号 | 化合物名 | 面积%     |
|----|--------|----------|--------|----|---------|------|--------|------|---------|
| 1  | 35.212 | 32614302 | 590449 | M  | 96.177  |      |        |      | 96.177  |
| 2  | 37.053 | 1296409  | 28930  | M  | 3.823   |      |        |      | 3.823   |
| 总计 |        | 33910711 | 619378 |    | 100.000 |      |        |      | 100.000 |

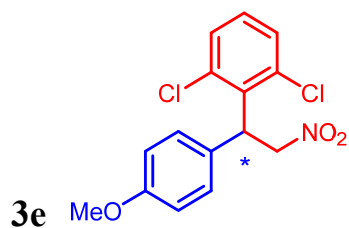

Colorless oil, 70% yield.

The NMR data is in accordance with that of previous publication.<sup>[4]</sup>

<sup>1</sup>H NMR (400 MHz, CDCl<sub>3</sub>), δ 3.78 (s, 3H, OCH<sub>3</sub>), 5.26 (dd,  $J_1 = 13.28$  Hz,  $J_2 = 7.44$  Hz, 1H), 5.42 (dd,  $J_1 = 13.28$  Hz,  $J_2 = 7.44$  Hz, 1H), 5.95 (dd,  $J_1 = J_2 = 7.44$  Hz, 1H), 6.82-6.86 (m, 2H, Aromatic H), 7.08-7.14 (m, 2H, Aromatic H), 7.18 (dd,  $J_1 = J_2 = 8.28$  Hz, 1H, Aromatic H), 7.28-7.40 (m, 2H, Aromatic H).

HPLC trace:

Daicel chiralcel OD-H, hexane/i-PrOH = 80/20, 220 nm, 1.0 mL/min.

$t_{R1} = 10.0$  min (major),  $t_{R2} = 14.9$  min (minor);

ee = 81.7%.

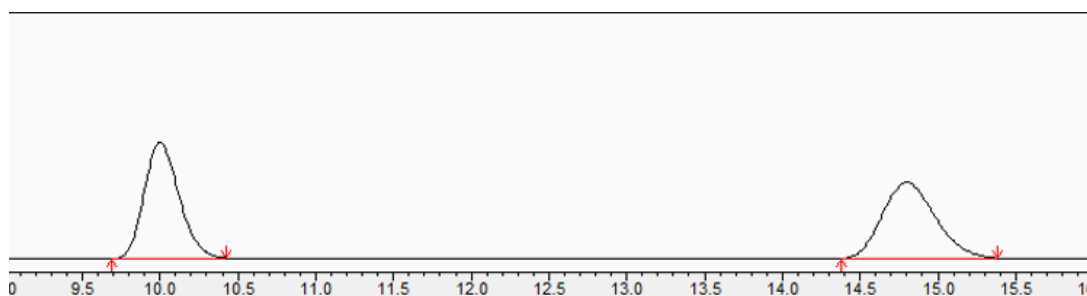

| 峰号 | 保留时间   | 面积       | 高度      | 标记 | 浓度      | 浓度单位 | 化合物ID号 | 化合物名 | 面积%     |
|----|--------|----------|---------|----|---------|------|--------|------|---------|
| 1  | 9.999  | 21783513 | 1397434 | M  | 50.237  |      |        |      | 50.237  |
| 2  | 14.799 | 21578117 | 913969  | M  | 49.763  |      |        |      | 49.763  |
| 总计 |        | 43361630 | 2311403 |    | 100.000 |      |        |      | 100.000 |

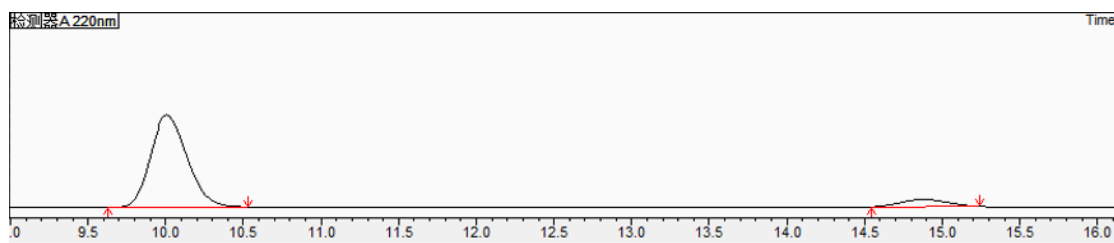

结果视图 - 峰表

| 峰号 | 保留时间   | 面积       | 高度      | 标记 | 浓度      | 浓度单位 | 化合物ID号 | 化合物名 | 面积%     |
|----|--------|----------|---------|----|---------|------|--------|------|---------|
| 1  | 10.008 | 22985275 | 1405201 | M  | 90.842  |      |        |      | 90.842  |
| 2  | 14.878 | 2317212  | 110417  | M  | 9.158   |      |        |      | 9.158   |
| 总计 |        | 25302487 | 1515818 |    | 100.000 |      |        |      | 100.000 |

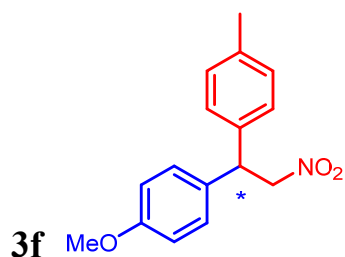

Colorless oil, 92% yield.

The NMR data is in accordance with that of previous publications.<sup>[4, 6]</sup>

<sup>1</sup>H NMR (400 MHz, CDCl<sub>3</sub>), δ 2.31 (s, 3H, CH<sub>3</sub>), 3.77 (s, 3H, OCH<sub>3</sub>), 4.82 (dd,  $J_1 = J_2 = 8.16$  Hz, 1H), 4.92-4.94 (m, 2H), 6.82-6.87 (m, 2H, Aromatic H), 7.09-7.17 (m, 6H, Aromatic H).

HPLC trace:

Daicel chiralcel OD-H, hexane/i-PrOH = 80/20, 220 nm, 1.0 mL/min.

$t_{R1} = 41.3$  min (major),  $t_{R2} = 46.0$  min (minor)];

ee = 97.9%.

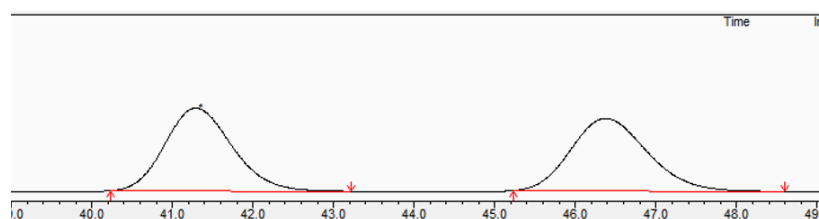

| 峰号 | 保留时间   | 面积       | 高度     | 标记 | 浓度      | 浓度单位 | 化合物ID号 | 化合物名 | 面积%     |
|----|--------|----------|--------|----|---------|------|--------|------|---------|
| 1  | 41.293 | 9812310  | 168850 | M  | 50.158  |      |        |      | 50.158  |
| 2  | 46.376 | 9750620  | 147578 | M  | 49.842  |      |        |      | 49.842  |
| 总计 |        | 19562930 | 316428 |    | 100.000 |      |        |      | 100.000 |

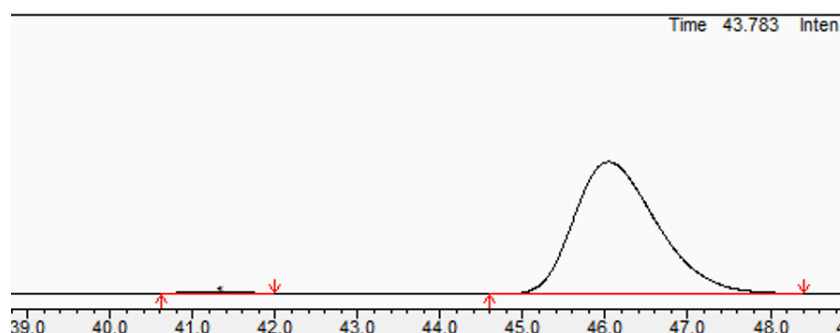

| 峰号 | 保留时间   | 面积        | 高度      | 标记 | 浓度      | 浓度单位 | 化合物ID号 | 化合物名 | 面积%     |
|----|--------|-----------|---------|----|---------|------|--------|------|---------|
| 1  | 41.253 | 1216241   | 26876   | M  | 1.065   |      |        |      | 1.065   |
| 2  | 46.041 | 112934712 | 1613060 | M  | 98.935  |      |        |      | 98.935  |
| 总计 |        | 114150953 | 1639936 |    | 100.000 |      |        |      | 100.000 |

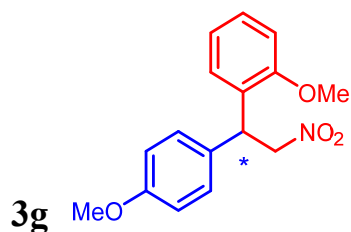

Colorless oil, 94% yield.

The NMR data is in accordance with that of previous publication.<sup>[4]</sup>

<sup>1</sup>H NMR (400 MHz, CDCl<sub>3</sub>), δ 3.77 (s, 3H, OCH<sub>3</sub>), 3.84 (s, 3H, OCH<sub>3</sub>), 4.91 (dd,  $J_1 = 12.76$  Hz,  $J_2 = 9.32$  Hz, 1H), 5.01 (dd,  $J_1 = 12.76$  Hz,  $J_2 = 6.84$  Hz, 1H), 5.21 (dd,  $J_1 = 9.32$  Hz,  $J_2 = 6.84$  Hz, 1H), 6.83-6.87 (m, 2H, Aromatic H), 6.87-6.92 (m, 2H, Aromatic H), 7.05 (dd,  $J_1 = 7.44$  Hz,  $J_2 = 1.64$  Hz, 1H, Aromatic H), 7.17-7.21 (m, 2H, Aromatic H), 7.22 (dd,  $J_1 = 7.72$  Hz,  $J_2 = 1.60$  Hz, 1H, Aromatic H).

HPLC trace:

Daicel chiralcel OD-H, hexane/i-PrOH = 80/20, 220 nm, 1.0 mL/min.

$t_{R1} = 12.5$  min (major),  $t_{R2} = 17.5$  min (minor)];

ee = 95.7%.

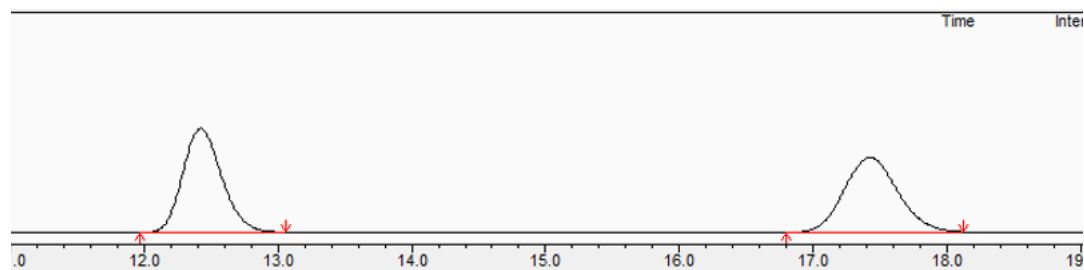

| 峰号 | 保留时间   | 面积       | 高度      | 标记 | 浓度      | 浓度单位 | 化合物ID号 | 化合物名 | 面积%     |
|----|--------|----------|---------|----|---------|------|--------|------|---------|
| 1  | 12.424 | 33190704 | 1638671 | M  | 50.169  |      |        |      | 50.169  |
| 2  | 17.424 | 32966899 | 1178456 | M  | 49.831  |      |        |      | 49.831  |
| 总计 |        | 66157602 | 2817126 |    | 100.000 |      |        |      | 100.000 |

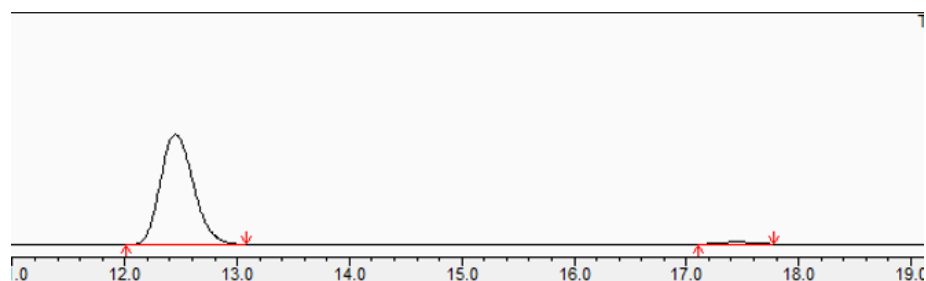

| 峰号 | 保留时间   | 面积       | 高度      | 标记 | 浓度      | 浓度单位 | 化合物ID号 | 化合物名 | 面积%     |
|----|--------|----------|---------|----|---------|------|--------|------|---------|
| 1  | 12.451 | 66673023 | 3240052 | M  | 97.897  |      |        |      | 97.897  |
| 2  | 17.444 | 1432411  | 64390   | M  | 2.103   |      |        |      | 2.103   |
| 总计 |        | 68105435 | 3304442 |    | 100.000 |      |        |      | 100.000 |

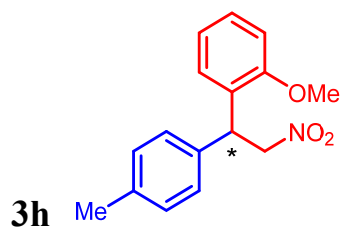

Colorless oil, 81% yield.

The NMR data is in accordance with that of previous publications.<sup>[6, 8]</sup>

<sup>1</sup>H NMR (400 MHz, CDCl<sub>3</sub>), δ 2.31 (s, 3H, CH<sub>3</sub>), 3.83 (s, 3H, OCH<sub>3</sub>), 4.90-5.04 (m, 2H), 5.23(m, 1H), 6.88 (t, *J*=8.60 Hz, 2H, Aromatic H), 7.05 (m, 1H, Aromatic H), 7.11(d, *J*=8.12 Hz, 2H, Aromatic H), 7.16 (d, *J*=8.16 Hz, 2H, Aromatic H), 7.23(m, 1H, Aromatic H).

HPLC trace:

Daicel chiralcel OD-H, hexane/i-PrOH = 90/10, 220 nm, 1.5 mL/min.

*t*<sub>R1</sub> = 7.83 min (major), *t*<sub>R2</sub> = 13.0 min (minor)

ee = 88.8%.

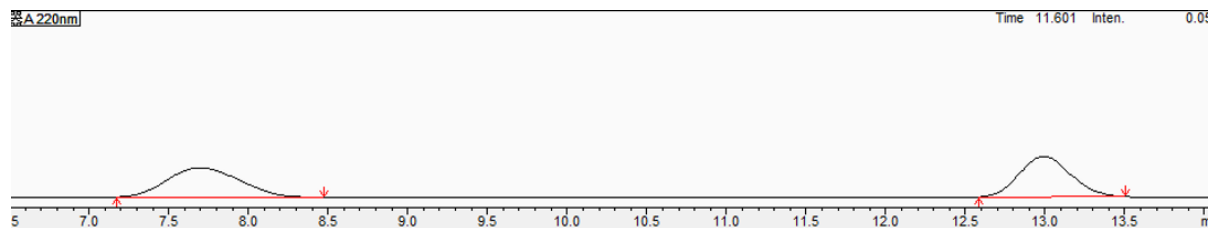

| 峰号 | 保留时间   | 面积       | 高度     | 标记 | 浓度      | 浓度单位 | 化合物ID号 | 化合物名 | 面积%     |
|----|--------|----------|--------|----|---------|------|--------|------|---------|
| 1  | 7.696  | 5910017  | 187288 | M  | 50.460  |      |        |      | 50.460  |
| 2  | 12.991 | 5802165  | 258236 | M  | 49.540  |      |        |      | 49.540  |
| 总计 |        | 11712182 | 445524 |    | 100.000 |      |        |      | 100.000 |

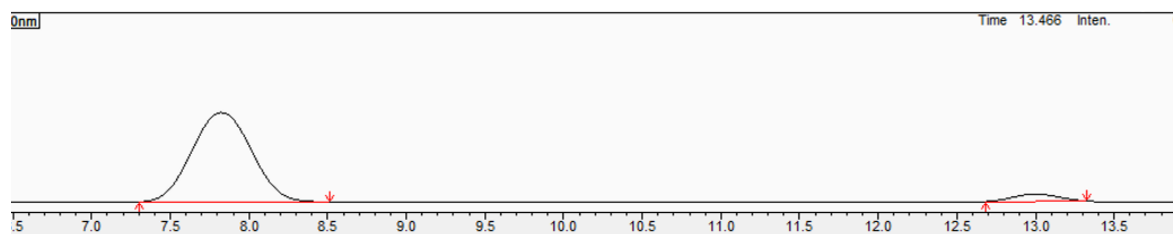

| 峰号 | 保留时间   | 面积      | 高度     | 标记 | 浓度      | 浓度单位 | 化合物ID号 | 化合物名 | 面积%     |
|----|--------|---------|--------|----|---------|------|--------|------|---------|
| 1  | 7.825  | 8958936 | 342260 | M  | 94.374  |      |        |      | 94.374  |
| 2  | 13.001 | 534097  | 27046  | M  | 5.626   |      |        |      | 5.626   |
| 总计 |        | 9493032 | 369306 |    | 100.000 |      |        |      | 100.000 |

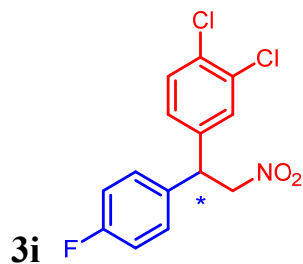

Colorless oil, 63% yield.

$^1\text{H}$  NMR (500 MHz,  $\text{CDCl}_3$ ),  $\delta$  4.85 (t,  $J=7.75$  Hz, 1H), 4.91-4.93 (m, 2H), 7.03-7.08 (m, 3H, Aromatic H), 7.16-9.19 (m, 2H, Aromatic H), 7.30 (s, 1H, Aromatic H), 7.41 (d,  $J=8.15$  Hz, 1H, Aromatic H).

$^{13}\text{C}$  NMR (125 MHz,  $\text{CDCl}_3$ ),  $\delta$  47.3, 78.7, 116.3, 116.4, 126.8, 129.2, 129.3, 129.7, 131.1, 132.9, 133.3, 139.2, 161.3, 163.3.

HPLC trace:

Daicel chiralcel OD-H, hexane/*i*-PrOH = 70/30, 220 nm, 1.2 mL/min.

$t_{R1}$  = 18.2 min (major),  $t_{R2}$  = 11.2 min (minor)

ee = 73.6%.

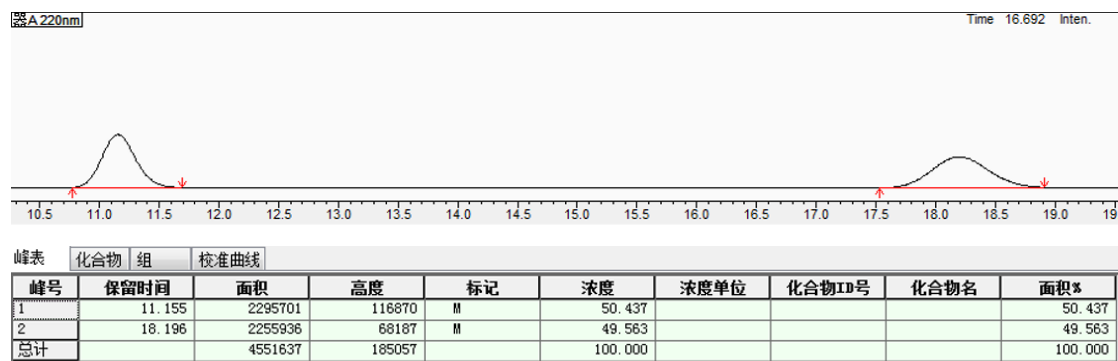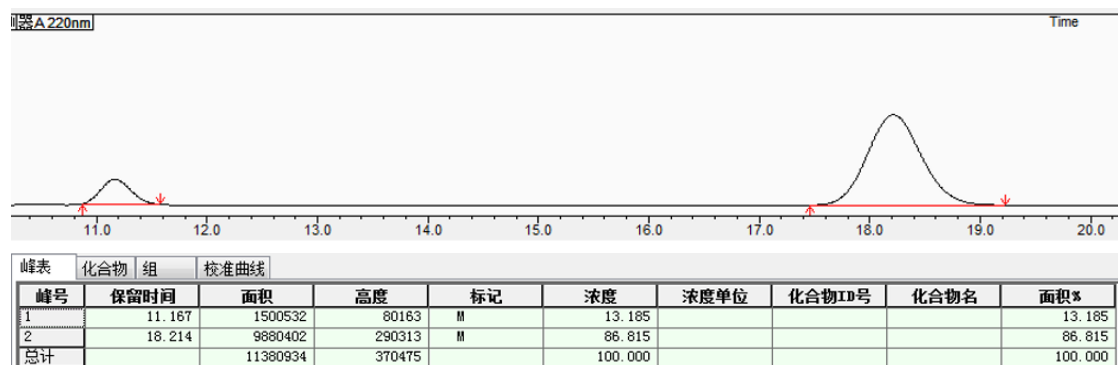



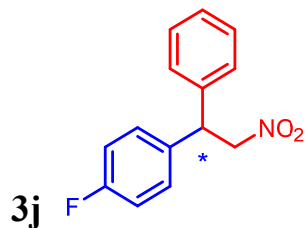

Colorless oil, 70% yield.

The NMR data is in accordance with that of previous publications.<sup>[4, 8]</sup>

<sup>1</sup>H NMR (400 MHz, CDCl<sub>3</sub>), δ 4.88 (m, 1H), 4.91-4.96 (m, 2H), 6.96-7.04 (m, 2H, Aromatic H), 7.16-7.23 (m, 4H, Aromatic H), 7.27 (m, 1H, Aromatic H), 7.29-7.36 (m, 2H, Aromatic H).

HPLC trace:

Daicel chiralcel OD-H, hexane/i-PrOH = 70/30, 220 nm, 1.0 mL/min.

t<sub>R1</sub> = 13.6min (minor), t<sub>R2</sub> = 22.8 min (major)

ee = 73.1%.

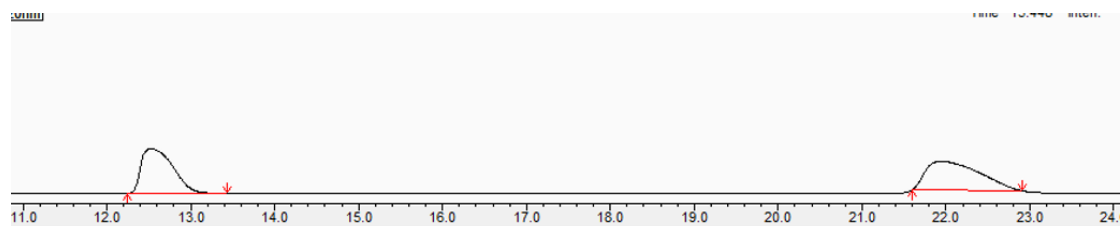

| 峰号 | 保留时间   | 面积        | 高度      | 标记 | 浓度      | 浓度单位 | 化合物ID号 | 化合物名 | 面积%     |
|----|--------|-----------|---------|----|---------|------|--------|------|---------|
| 1  | 12.525 | 82331814  | 3175415 | M  | 47.177  |      |        |      | 47.177  |
| 2  | 21.945 | 92186281  | 2058054 | M  | 52.823  |      |        |      | 52.823  |
| 总计 |        | 174518095 | 5233469 |    | 100.000 |      |        |      | 100.000 |

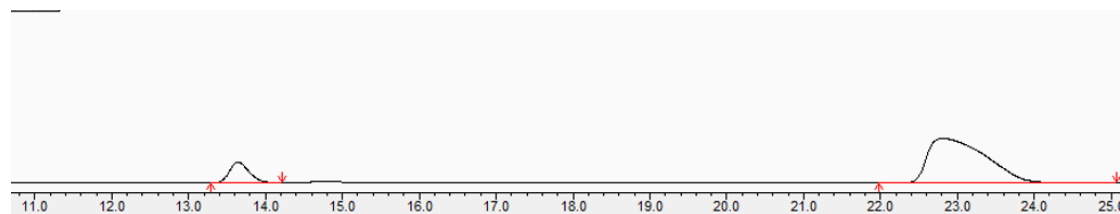

| 峰号 | 保留时间   | 面积        | 高度      | 标记 | 浓度      | 浓度单位 | 化合物ID号 | 化合物名 | 面积%     |
|----|--------|-----------|---------|----|---------|------|--------|------|---------|
| 1  | 13.640 | 20255677  | 1162909 | M  | 13.431  |      |        |      | 13.431  |
| 2  | 22.814 | 130561636 | 2507279 | M  | 86.569  |      |        |      | 86.569  |
| 总计 |        | 150817313 | 3670188 |    | 100.000 |      |        |      | 100.000 |

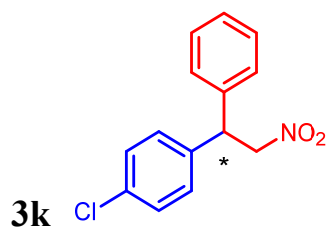

Colorless oil, 72% yield.

The NMR data is in accordance with that of previous publications.<sup>[4, 6, 8]</sup>

<sup>1</sup>H NMR (400 MHz, CDCl<sub>3</sub>), δ 4.88 (m, 1H), 4.92-4.98 (m, 2H), 7.16-7.23 (m, 4H, Aromatic H), 7.27-7.36 (m, 5H, Aromatic H).

HPLC trace:

Daicel chiralcel OD-H, hexane/i-PrOH = 70/30, 220 nm, 1.0 mL/min.

$t_{R1}$  = 17.6 min (minor),  $t_{R2}$  = 28.0 min (major)

ee = 61.8%.

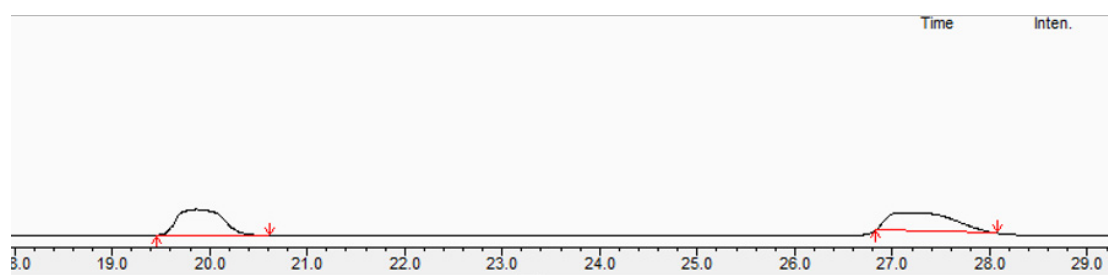

| 峰号 | 保留时间   | 面积        | 高度      | 标记 | 浓度      | 浓度单位 | 化合物ID号 | 化合物名 | 面积%     |
|----|--------|-----------|---------|----|---------|------|--------|------|---------|
| 1  | 19.865 | 114342747 | 3536972 | M  | 48.582  |      |        |      | 48.582  |
| 2  | 27.159 | 121015176 | 2557376 | M  | 51.418  |      |        |      | 51.418  |
| 总计 |        | 235357922 | 6094349 |    | 100.000 |      |        |      | 100.000 |

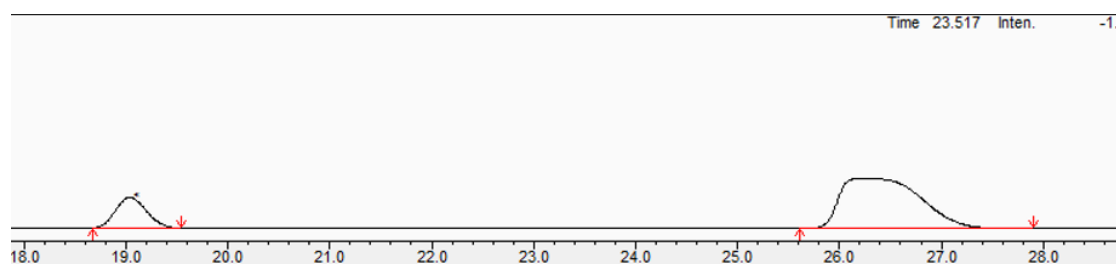

| 峰号 | 保留时间   | 面积        | 高度      | 标记 | 浓度      | 浓度单位 | 化合物ID号 | 化合物名 | 面积%     |
|----|--------|-----------|---------|----|---------|------|--------|------|---------|
| 1  | 19.039 | 41123748  | 1947397 | M  | 19.105  |      |        |      | 19.105  |
| 2  | 26.243 | 174131961 | 3208748 | M  | 80.895  |      |        |      | 80.895  |
| 总计 |        | 215255709 | 5154145 |    | 100.000 |      |        |      | 100.000 |

31

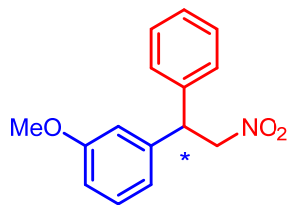

Colorless oil, 78% yield.

The NMR data is in accordance with that of previous publications.<sup>[4, 6]</sup>

<sup>1</sup>H NMR (400 MHz, CDCl<sub>3</sub>), δ 3.77 (s, 3H, OCH<sub>3</sub>), 4.87 (m, 1H), 4.94-4.99 (m, 2H), 6.77 (m, 1H, Aromatic H), 6.79 (m, 1H, Aromatic H), 6.84 (d, *J* = 7.88 Hz, 1H, Aromatic H), 7.22-7.27 (m, 4H, Aromatic H), 7.30-7.35 (m, 2H, Aromatic H).

HPLC trace:

Daicel chiralcel OD-H, hexane/*i*-PrOH = 80/20, 220 nm, 1.0 mL/min.

*t*<sub>R1</sub> = 41.0 min (minor), *t*<sub>R2</sub> = 61.9 min (major)

ee = 79.5%.

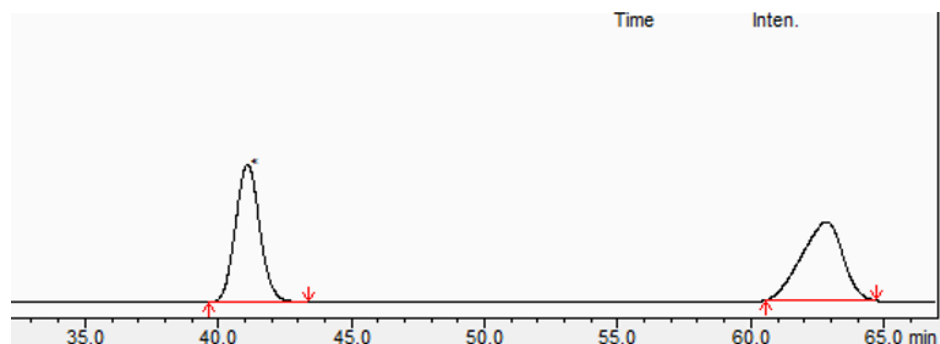

| 峰号 | 保留时间   | 面积        | 高度      | 标记 | 浓度      | 浓度单位 | 化合物ID号 | 化合物名 | 面积%     |
|----|--------|-----------|---------|----|---------|------|--------|------|---------|
| 1  | 41.103 | 83221152  | 1310007 | M  | 50.813  |      |        |      | 50.813  |
| 2  | 62.842 | 80556923  | 745155  | M  | 49.187  |      |        |      | 49.187  |
| 总计 |        | 163778075 | 2055162 |    | 100.000 |      |        |      | 100.000 |

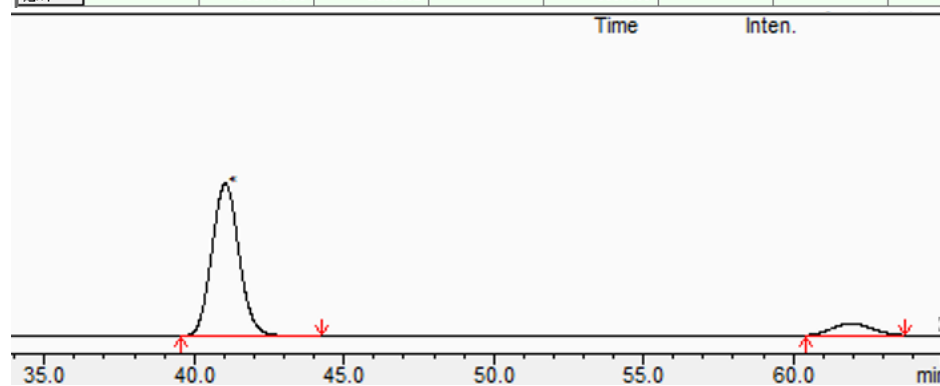

| 峰号 | 保留时间   | 面积       | 高度      | 标记 | 浓度      | 浓度单位 | 化合物ID号 | 化合物名 | 面积%     |
|----|--------|----------|---------|----|---------|------|--------|------|---------|
| 1  | 41.040 | 81822445 | 1291914 | M  | 89.709  |      |        |      | 89.709  |
| 2  | 61.927 | 9386302  | 101003  | M  | 10.291  |      |        |      | 10.291  |
| 总计 |        | 91208748 | 1392917 |    | 100.000 |      |        |      | 100.000 |

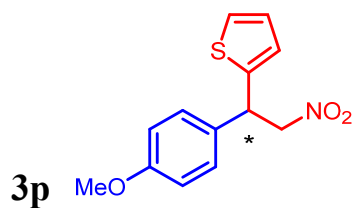

Colorless oil, 62% yield.

The NMR data is in accordance with that of previous publications.<sup>[7-9]</sup>

<sup>1</sup>H NMR (400 MHz, CDCl<sub>3</sub>), δ 3.79 (s, 3H, OCH<sub>3</sub>), 4.89 (dd,  $J_1 = 12.60$  Hz,  $J_2 = 8.56$  Hz, 1H), 4.97 (dd,  $J_1 = 12.60$  Hz,  $J_2 = 7.52$  Hz, 1H), 5.08 (dd,  $J_1 = 8.56$  Hz,  $J_2 = 7.52$  Hz, 1H), 6.86-6.90 (m, 3H, Aromatic H), 6.95 (dd,  $J_1 = 5.12$  Hz,  $J_2 = 3.52$  Hz, 1H, Aromatic H), 7.19-7.24 (m, 3H, Aromatic H).

HPLC trace:

Daicel chiralcel OD-H, hexane/i-PrOH = 60/40, 220 nm, 1.0 mL/min.

$t_{R1} = 11.4$  min (major),  $t_{R2} = 17.4$  min (minor)

ee = 85.5%.

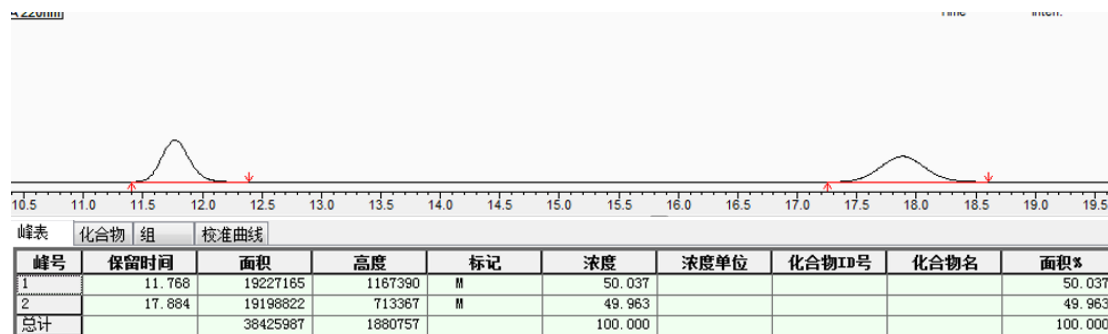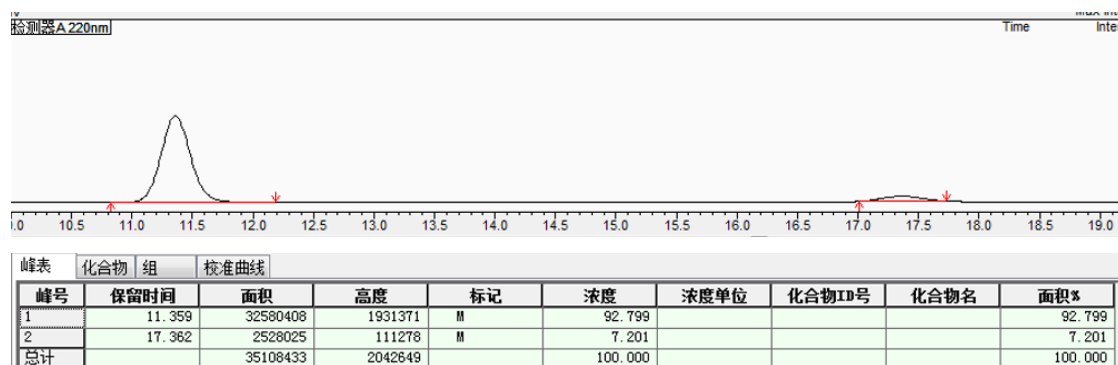

3q

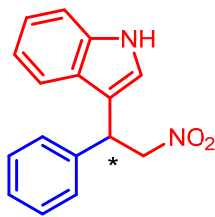

Colorless solid, 62% yield.

The NMR data is in accordance with that of previous publications.<sup>[10-11]</sup>

<sup>1</sup>H NMR (400 MHz, CDCl<sub>3</sub>), δ 4.97 (dd,  $J_1 = 12.48$  Hz,  $J_2 = 8.36$  Hz, 1H), 4.99 (dd,  $J_1 = 12.48$  Hz,  $J_2 = 7.68$  Hz, 1H), 5.22 (t,  $J = 8.04$  Hz, 1H), 7.05 (d,  $J = 2.20$  Hz, 1H, Aromatic H), 7.11 (m, 1H, Aromatic H), 7.24 (m, 1H, Aromatic H), 7.29 (m, 1H, Aromatic H), 7.33-7.39 (m, 5H, Aromatic H), 7.48 (d,  $J = 8.04$  Hz, 1H, Aromatic H), 8.12 (s, 1H).

HPLC trace:

Daicel chiralcel OD-H, hexane/i-PrOH = 70/30, 220 nm, 1.0 mL/min.

$t_{R1} = 26.5$  min (major),  $t_{R2} = 32.6$  min (minor)

ee = 61.1%

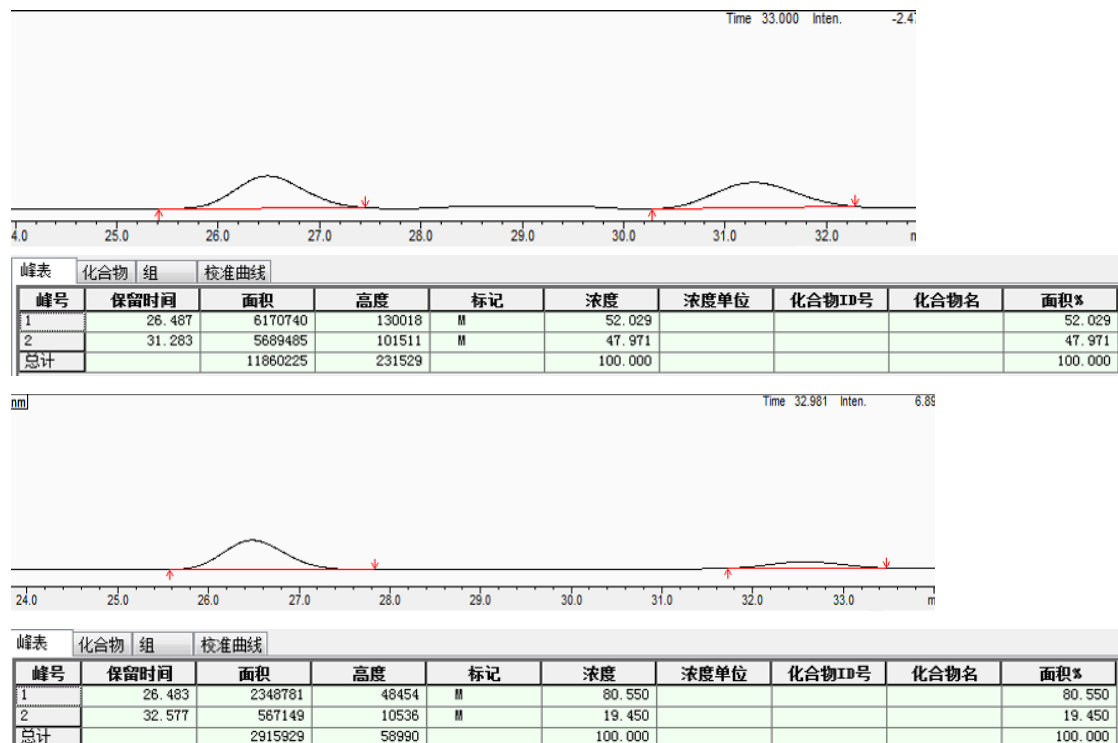

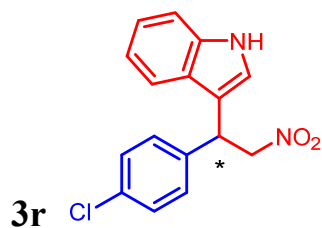

Colorless solid, 60% yield.

The NMR data is in accordance with that of previous publications.<sup>[10-11]</sup>

<sup>1</sup>H NMR (500 MHz, CDCl<sub>3</sub>), δ 4.85 (t, *J* = 110.25 Hz, 1H), 5.00 (dd, *J*<sub>1</sub> = 10.25 Hz, *J*<sub>2</sub> = 7.55 Hz, 1H), 5.12 (t, *J* = 7.60 Hz, 1H), 6.6.97-7.01 (m, 3H, Aromatic H), 7.04 (t, *J* = 7.30 Hz, 1H, Aromatic H), 7.16 (t, *J* = 7.20 Hz, 1H, Aromatic H), 7.27-7.30 (m, 2H, Aromatic H), 7.31 (d, *J* = 8.00 Hz, 1H, Aromatic H) 7.36 (d, *J* = 7.85 Hz, 1H, Aromatic H), 8.08 (s, 1H).

HPLC trace:

Daicel chiralcel OD-H, hexane/i-PrOH = 70/30, 220 nm, 1.0 mL/min.

*t*<sub>R1</sub> = 22.8 min (major), *t*<sub>R2</sub> = 29.8 min (minor)

ee = 71.1%.

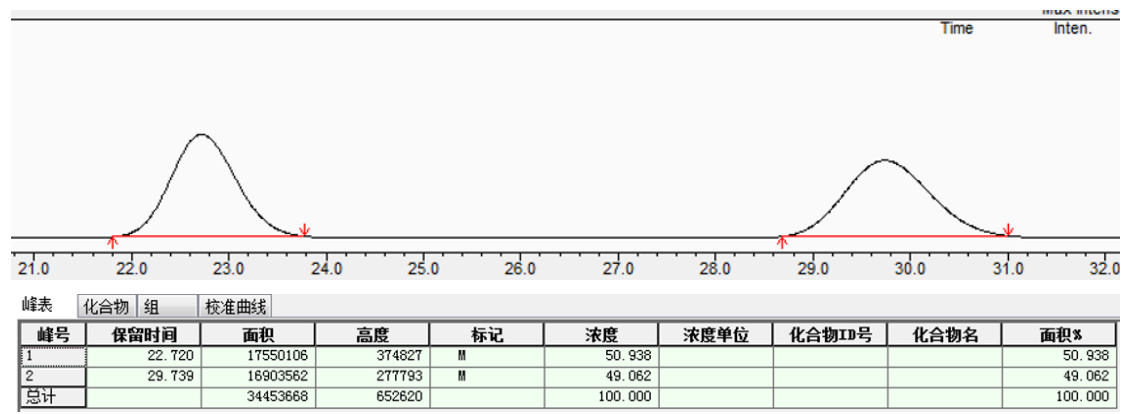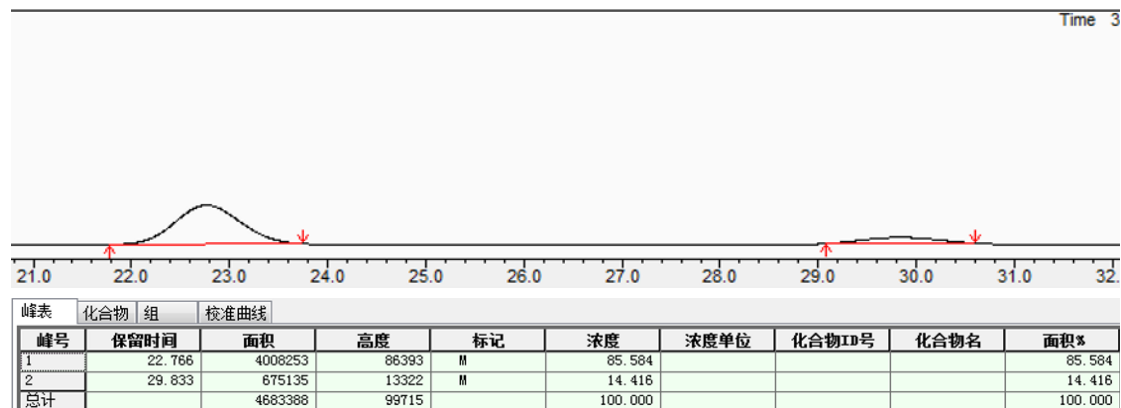

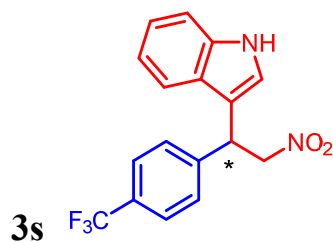

Colorless solid, 57% yield.

The NMR data is in accordance with that of previous publications.<sup>[12-13]</sup>

<sup>1</sup>H NMR (500 MHz, CDCl<sub>3</sub>), δ 4.97 (dd,  $J_1 = 11.75$  Hz,  $J_2 = 8.85$  Hz, 1H), 5.09 (dd,  $J_1 = 12.10$  Hz,  $J_2 = 7.20$  Hz, 1H), 5.26 (t,  $J = 8.05$  Hz, 1H), 7.04 (m, 1H, Aromatic H), 7.09 (m, 1H, Aromatic H), 7.22 (t,  $J = 7.80$  Hz, 1H, Aromatic H), 7.35-7.42 (m, 2H, Aromatic H), 7.47 (d,  $J = 7.90$  Hz, 2H, Aromatic H), 7.58 (d,  $J = 7.95$  Hz, 2H, Aromatic H), 8.17 (s, 1H).

HPLC trace:

Daicel chiralcel OD-H, hexane/i-PrOH = 70/30, 220 nm, 1.0 mL/min.

$t_{R1} = 23.7$  min (major),  $t_{R2} = 30.5$  min (minor)

ee = 82.9%.

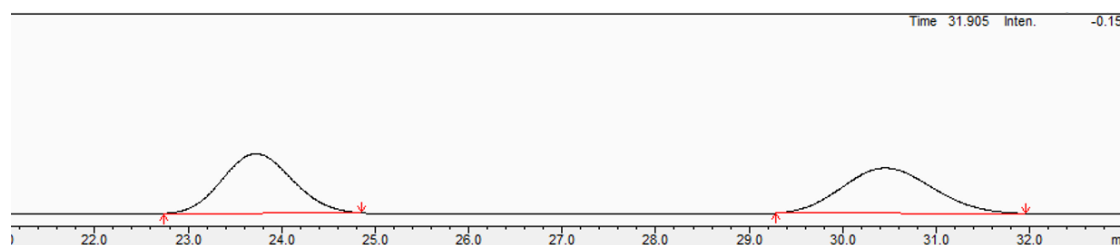

| 峰号 | 保留时间   | 面积      | 高度     | 标记 | 浓度      | 浓度单位 | 化合物ID号 | 化合物名 | 面积%     |
|----|--------|---------|--------|----|---------|------|--------|------|---------|
| 1  | 23.724 | 3980734 | 76098  | M  | 50.284  |      |        |      | 50.284  |
| 2  | 30.455 | 3935837 | 57956  | M  | 49.716  |      |        |      | 49.716  |
| 总计 |        | 7916571 | 134054 |    | 100.000 |      |        |      | 100.000 |

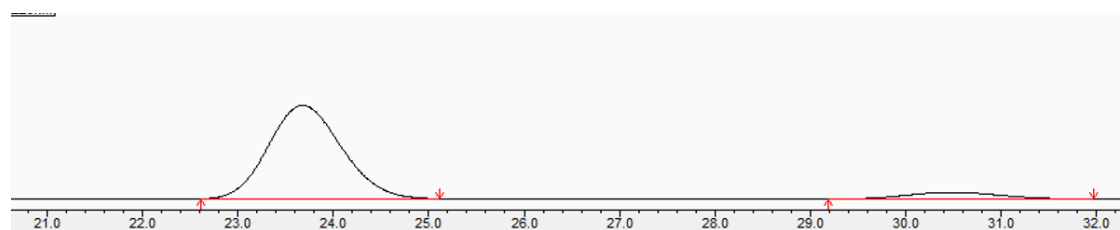

| 峰号 | 保留时间   | 面积       | 高度     | 标记 | 浓度      | 浓度单位 | 化合物ID号 | 化合物名 | 面积%     |
|----|--------|----------|--------|----|---------|------|--------|------|---------|
| 1  | 23.677 | 30612941 | 571405 | M  | 91.416  |      |        |      | 91.416  |
| 2  | 30.483 | 2874464  | 41905  | M  | 8.584   |      |        |      | 8.584   |
| 总计 |        | 33487405 | 613310 |    | 100.000 |      |        |      | 100.000 |

3t

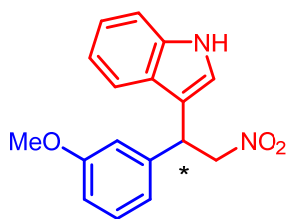

Colorless solid, 58% yield.

The NMR data is in accordance with that of previous publications.<sup>[10-11]</sup>

<sup>1</sup>H NMR (500 MHz, CDCl<sub>3</sub>),  $\delta$  3.76 (s, 3H, OMe), 4.93 (dd,  $J_1=9.90$  Hz,  $J_2=7.15$  Hz, 1H), 5.04 t,  $J = 10.30$  Hz, 1H), 5.16 (t,  $J=8.15$  Hz, 1H), 6.79 (d,  $J = 8.40$  Hz, 1H, Aromatic H), 6.86 (s, 1H, Aromatic H), 6.93 (d,  $J = 7.80$  Hz, 1H, Aromatic H), 7.04 (s, 1H, Aromatic H), 7.08 (t,  $J = 7.70$  Hz, 1H, Aromatic H), 7.18-7.24 (m, 2H, Aromatic H), 7.35 (d,  $J = 8.25$  Hz, 1H, Aromatic H), 7.47 (d,  $J = 8.00$  Hz, 1H, Aromatic H), 8.10 (s, 1H).

HPLC trace:

Daicel chiralcel OD-H, hexane/i-PrOH = 70/30, 220 nm, 1.0 mL/min.

$t_{R1} = 21.1$  min (major),  $t_{R2} = 30.9$  min (minor)

ee = 63.3%.

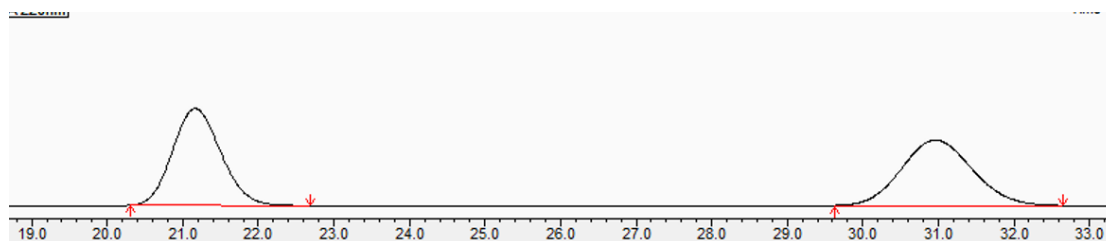

| 峰号 | 保留时间   | 面积       | 高度     | 标记 | 浓度      | 浓度单位 | 化合物ID号 | 化合物名 | 面积%     |
|----|--------|----------|--------|----|---------|------|--------|------|---------|
| 1  | 21.164 | 14914052 | 336508 | M  | 50.044  |      |        |      | 50.044  |
| 2  | 30.962 | 14887958 | 227336 | M  | 49.956  |      |        |      | 49.956  |
| 总计 |        | 29802010 | 563844 |    | 100.000 |      |        |      | 100.000 |

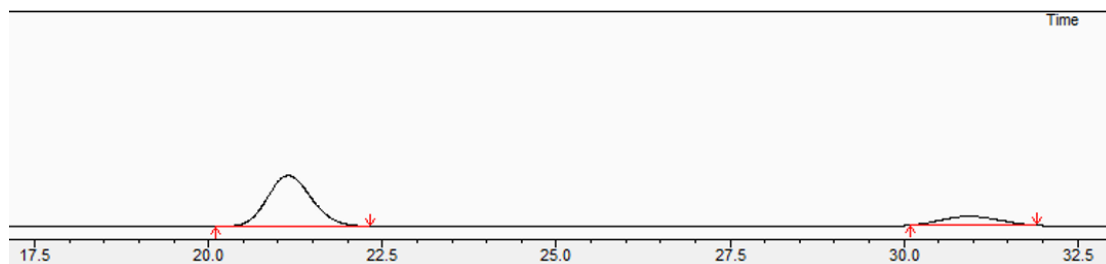

| 峰号 | 保留时间   | 面积       | 高度     | 标记 | 浓度      | 浓度单位 | 化合物ID号 | 化合物名 | 面积%     |
|----|--------|----------|--------|----|---------|------|--------|------|---------|
| 1  | 21.145 | 17900431 | 404116 | M  | 81.632  |      |        |      | 81.632  |
| 2  | 30.940 | 4027729  | 70767  | M  | 18.368  |      |        |      | 18.368  |
| 总计 |        | 21928160 | 474883 |    | 100.000 |      |        |      | 100.000 |



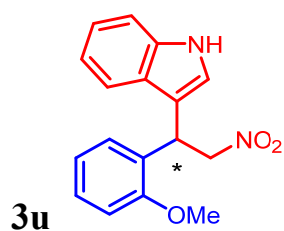

Colorless solid, 48% yield.

The NMR data is in accordance with that of previous publications.<sup>[10-11]</sup>

<sup>1</sup>H NMR (500 MHz, CDCl<sub>3</sub>), δ 3,87 (s, 3H, OMe), 4.92 -5.03 (m, 2H), 5.57 (t, *J* =7.50 Hz, 1H), 6.80 (t, *J* = 7.10 Hz, 1H, Aromatic H), 6.89 (d, *J* = 8.10 Hz 1H, Aromatic H), 7.03 -7.07 (m, 3H, Aromatic H), 7.15 (t, *J* = 7.10 Hz, 1H, Aromatic H), 7.20 (t, *J* = 6.40 Hz, 1H, Aromatic H), 7.28 (d, *J* = 8.05 Hz, 1H, Aromatic H), 7.44 (d, *J* = 7.75 Hz, 1H, Aromatic H), 8.03 (s, 1H).

HPLC trace:

Daicel chiralcel OD-H, hexane/i-PrOH = 70/30, 220 nm, 1.0 mL/min.

*t*<sub>R1</sub> = 12.0 min (minor), *t*<sub>R2</sub> = 13.6 min (minor)

ee = 90.3%.

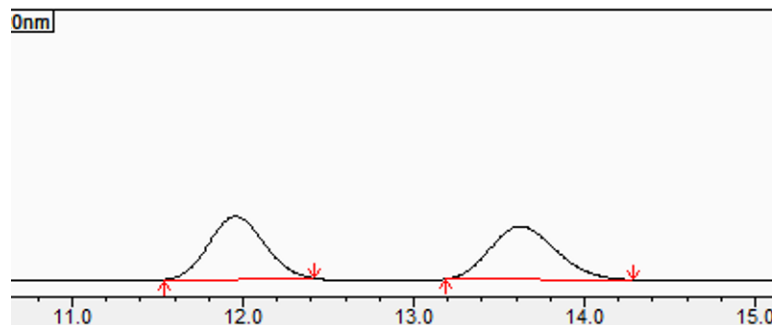

| 峰号 | 保留时间   | 面积       | 高度     | 标记 | 浓度      | 浓度单位 | 化合物ID号 | 化合物名 | 面积%     |
|----|--------|----------|--------|----|---------|------|--------|------|---------|
| 1  | 11.956 | 11991712 | 531127 | M  | 49.657  |      |        |      | 49.657  |
| 2  | 13.623 | 12157530 | 451501 | M  | 50.343  |      |        |      | 50.343  |
| 总计 |        | 24149242 | 982628 |    | 100.000 |      |        |      | 100.000 |

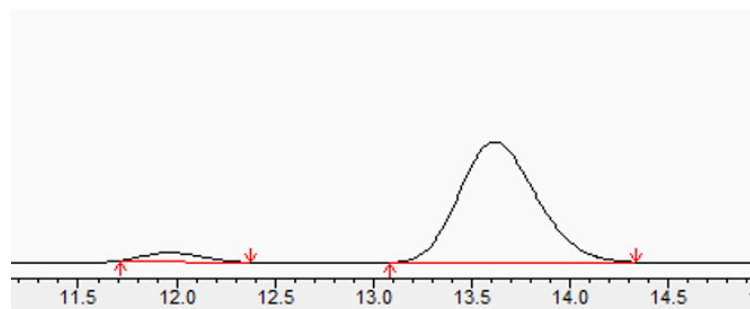

| 峰号 | 保留时间   | 面积       | 高度     | 标记 | 浓度      | 浓度单位 | 化合物ID号 | 化合物名 | 面积%     |
|----|--------|----------|--------|----|---------|------|--------|------|---------|
| 1  | 11.967 | 752266   | 38218  | M  | 4.852   |      |        |      | 4.852   |
| 2  | 13.619 | 14750866 | 536766 | M  | 95.148  |      |        |      | 95.148  |
| 总计 |        | 15503131 | 574984 |    | 100.000 |      |        |      | 100.000 |

## Enantioselective Addition of Arylboronic Acids to $\beta$ -substituted Cyclic Enones

### General procedure

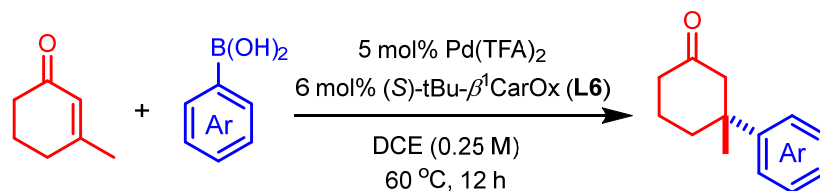

To a Schlenk tube charged with Pd(TFA)<sub>2</sub> (4.15 mg, 0.0125 mmol), (*S*)-tBu- $\beta^1$ CarOx (4.4 mg, 0.015 mmol) and aryl boronic acid (0.5 mmol), was added dichloroethane (0.5 mL) for dissolution and then  $\beta$ -substituted cyclic enones (0.25 mmol) was added. The walls of the vial were rinsed with an additional portion of dichloroethane (0.5 mL). The vial was capped with a Teflon/silicone septum and stirred in a 60 °C oil bath for 12 h. The reaction mixture was cooled to room temperature, and the solvent was removed by rotary evaporation. The residue was purified by column chromatography (petroleum ether/EtOAc = 20/1, v/v) to give the product.

Racemic products were synthesized in a manner analogous to the general procedure using bipyridine (2.1 mg, 0.015 mmol, 6 mol%) as an achiral ligand.

### Concise optimization

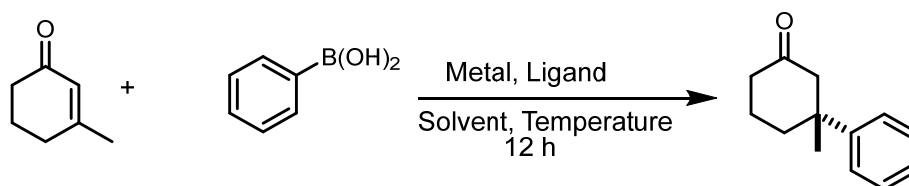

| Entry | Metal                | $\beta$ -CarOx | Solvent | Temperature | Yield(%) | ee(%) |
|-------|----------------------|----------------|---------|-------------|----------|-------|
| 1     | Pd(TFA) <sub>2</sub> | <b>L3</b>      | DCE     | 60 °C       | 78       | 50    |
| 2     | Pd(TFA) <sub>2</sub> | <b>L6</b>      | DCE     | 60 °C       | 88       | 94    |
| 3     | Pd(TFA) <sub>2</sub> | <b>L7</b>      | DCE     | 60 °C       | 76       | 91    |
| 4     | Pd(TFA) <sub>2</sub> | <b>L8</b>      | DCE     | 60 °C       | 73       | 32    |
| 5     | Pd(TFA) <sub>2</sub> | <b>L10</b>     | DCE     | 60 °C       | 56       | 93    |
| 6     | PdCl <sub>2</sub>    | <b>L6</b>      | DCE     | 60 °C       | <5       | n.d.  |
| 7     | Pd(OAc) <sub>2</sub> | <b>L6</b>      | DCE     | 60 °C       | 67       | 89    |
| 8     | Pd(TFA) <sub>2</sub> | <b>L6</b>      | DCM     | 40 °C       | 49       | 90    |
| 9     | Pd(TFA) <sub>2</sub> | <b>L6</b>      | MeOH    | 60 °C       | <5       | n.d.  |
| 10    | Pd(TFA) <sub>2</sub> | <b>L6</b>      | DCE     | 40 °C       | 72       | 90    |
| 11    | Pd(TFA) <sub>2</sub> | <b>L6</b>      | DCE     | 80 °C       | 86       | 87    |

## Substrate Scope

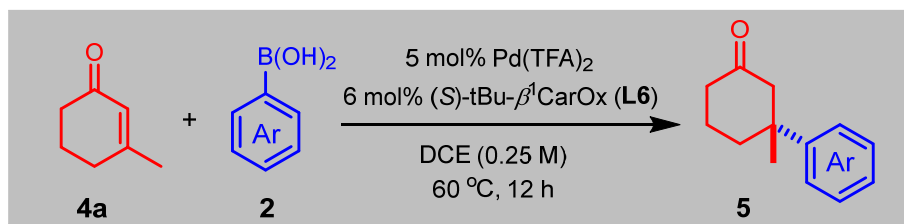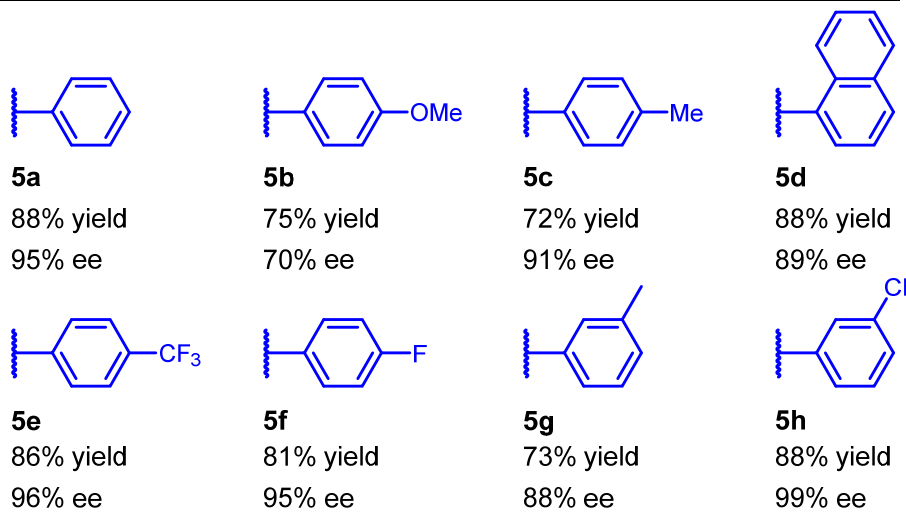

## HPLC traces of the Enantioenriched $\beta$ -aryl ketones

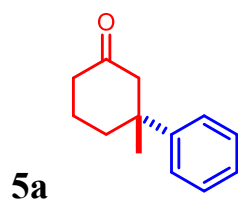

Colorless oil, 88% yield.

The NMR data is in accordance with that of previous publication.<sup>[14]</sup>

<sup>1</sup>H NMR (400 MHz, CDCl<sub>3</sub>),  $\delta$  1.35(s, 3H, CH<sub>3</sub>), 1.67 (m, 1H), 1.87-1.98 (m, 2H), 2.21 (m, 1H), 2.2.31-2.42 (m, 2H), 2.46 (d,  $J=14.12$  Hz, 1H), 2.91 (d,  $J=14.20$  Hz, 1H), 7.20-7.25 (m, 1H, Aromatic H), 7.32-7.37 (m, 4H, Aromatic H).

HPLC trace:

Daicel chiralcel OJ-H, hexane/*i*-PrOH = 95/5, 220 nm, 1.0 mL/min.

$t_{R1}$  = 9.1 min (major),  $t_{R2}$  = 10.5 min (minor)

ee = 94.9%.

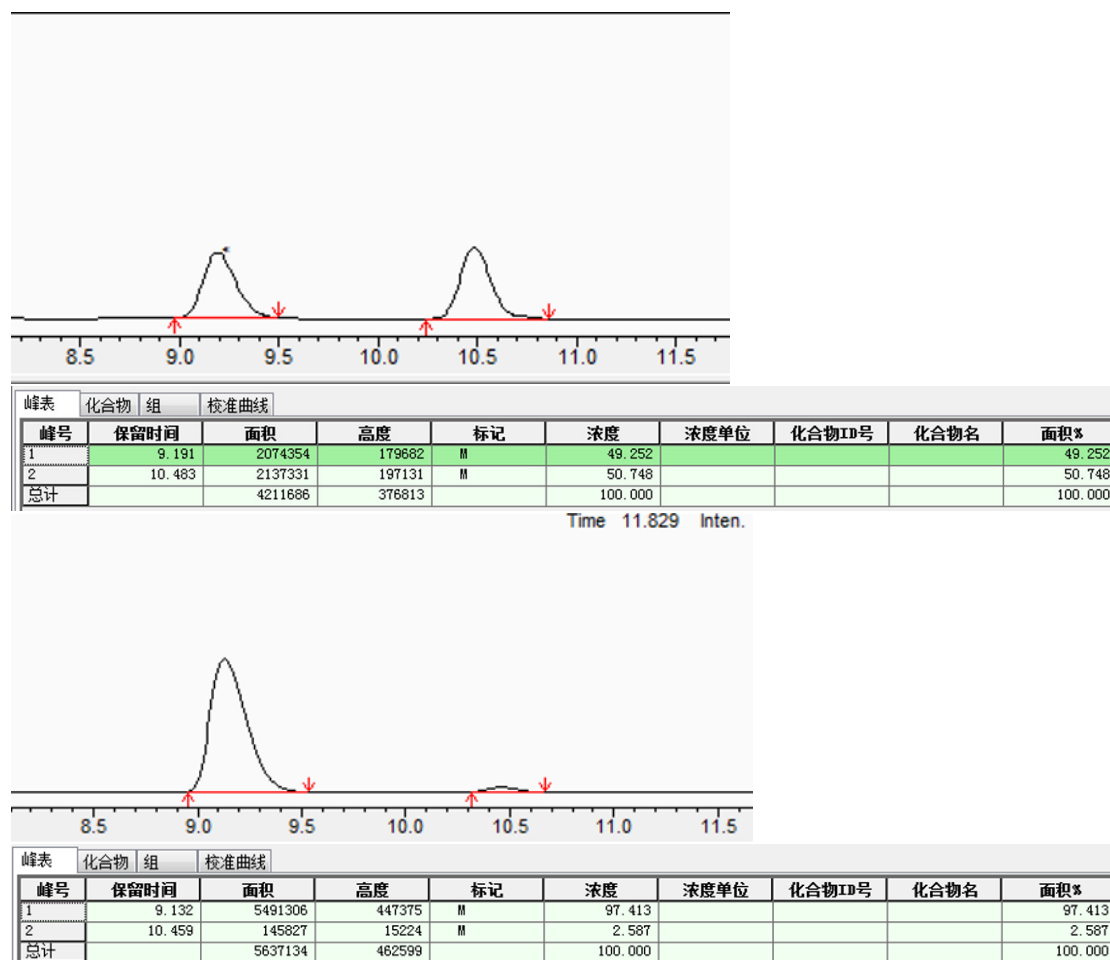

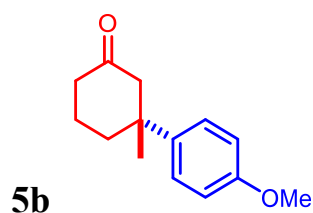

Colorless oil, 75% yield.

The NMR data is in accordance with that of previous publications.<sup>[14-16]</sup>

<sup>1</sup>H NMR (400 MHz, CDCl<sub>3</sub>), δ 1.31(s, 3H, CH<sub>3</sub>), 1.68 (m, 1H), 1.85-1.94 (m, 2H), 2.2-2.21 (m, 1H), 2.30-2.32 (m, 2H), 2.43 (d, *J*=14.12 Hz, 1H), 2.87 (d, *J*=14.16 Hz, 1H), 3.79 (s, 3H), 6.85-6.89 (m, 2H, Aromatic H), 7.23-7.27 (m, 2H, Aromatic H).

HPLC trace:

Daicel chiralcel OJ-H, hexane/*i*-PrOH = 95/5, 220 nm, 1.0 mL/min.

*t*<sub>R1</sub> = 15.0 min (major), *t*<sub>R2</sub> = 18.5 min (minor)

ee = 70.2%.

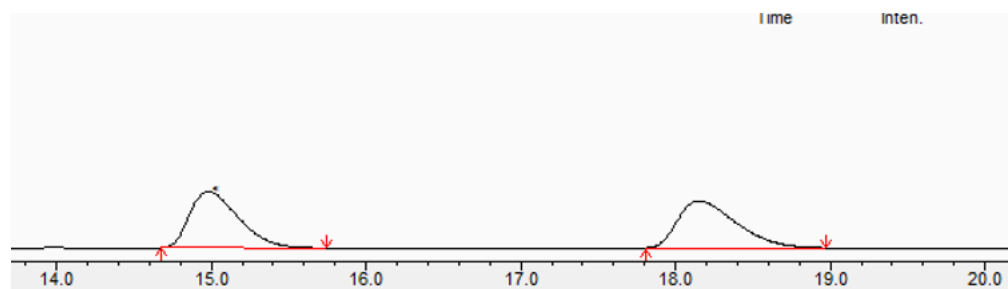

| 峰号 | 保留时间   | 面积       | 高度     | 标记 | 浓度      | 浓度单位 | 化合物ID号 | 化合物名 | 面积%     |
|----|--------|----------|--------|----|---------|------|--------|------|---------|
| 1  | 14.980 | 11820971 | 543550 | M  | 50.135  |      |        |      | 50.135  |
| 2  | 18.151 | 11757375 | 451541 | M  | 49.865  |      |        |      | 49.865  |
| 总计 |        | 23578346 | 995091 |    | 100.000 |      |        |      | 100.000 |

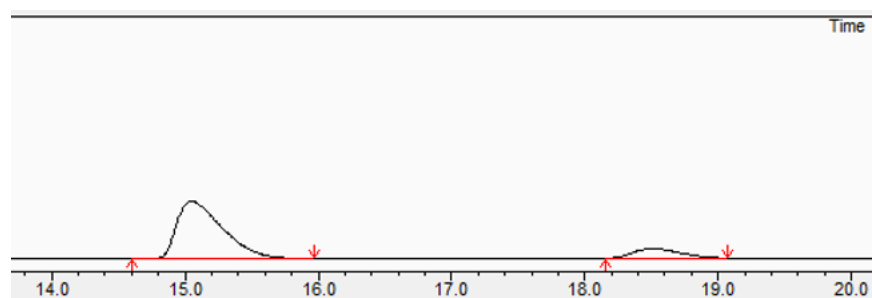

| 峰号 | 保留时间   | 面积       | 高度      | 标记 | 浓度      | 浓度单位 | 化合物ID号 | 化合物名 | 面积%     |
|----|--------|----------|---------|----|---------|------|--------|------|---------|
| 1  | 15.050 | 25896596 | 1098923 | M  | 85.087  |      |        |      | 85.087  |
| 2  | 18.507 | 4538757  | 185622  | M  | 14.913  |      |        |      | 14.913  |
| 总计 |        | 30435353 | 1284545 |    | 100.000 |      |        |      | 100.000 |

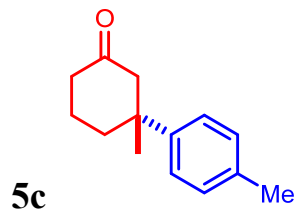

Colorless oil, 72% yield.

The NMR data is in accordance with that of previous publications. <sup>[14-16]</sup>

<sup>1</sup>H NMR (400 MHz, CDCl<sub>3</sub>), δ 1.33(s, 3H, CH<sub>3</sub>), 1.1-1.70 (m, 1H), 1.86-1.95 (m, 2H), 2.12-1.19 (m, 1H), 2.28-2.32 (m, 2H), 2.34 (s, 3H, CH<sub>3</sub>), 2.44 (d, *J*=8.12 Hz, 1H), 2.89 (d, *J*=9.80 Hz, 1H), 7.16 (d, *J*=8.16 Hz, 2H, Aromatic H), 7.23 (d, *J*=8.28 Hz, 2H, Aromatic H).

HPLC trace:

Daicel chiralcel OJ-H, hexane/*i*-PrOH = 95/5, 220 nm, 1.0 mL/min.

*t*<sub>R1</sub> = 15.7 min (major), *t*<sub>R2</sub> = 19.5 min (minor)

ee = 91.2%.

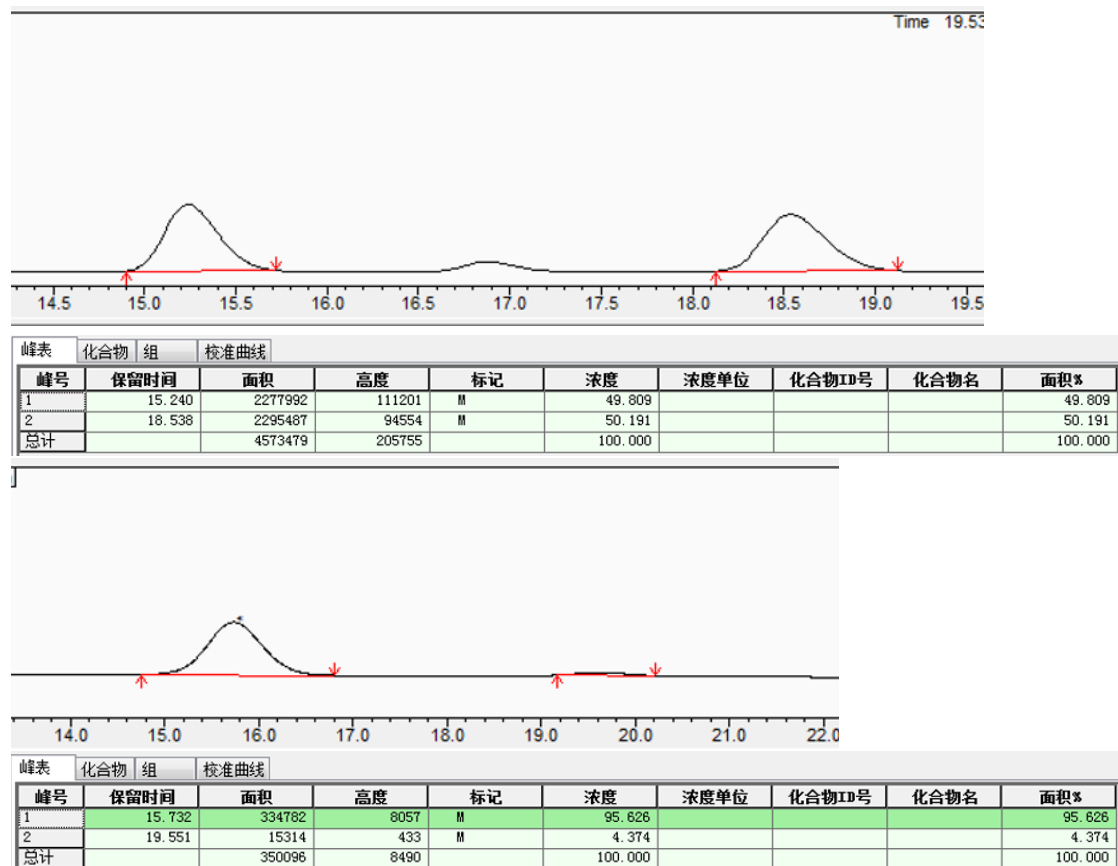

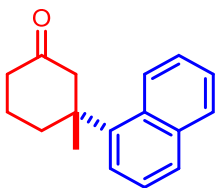

**5d**

Colorless oil, 88% yield.

The NMR data is in accordance with that of previous publication.<sup>[17]</sup>

<sup>1</sup>H NMR (400 MHz, CDCl<sub>3</sub>), δ 1.44 (s, 3H, CH<sub>3</sub>), 1.67 (m, 1H), 1.89-2.05 (m, 2H), 2.31-2.38 (m, 3H), 2.55 (d, *J*=14.24 Hz, 1H), 3.05 (d, *J*=14.32 Hz, 1H), 7.46-7.52 (m, 3H, Aromatic H), 7.73 (d, *J*=1.64 Hz, 1H, Aromatic H), 7.82-7.86 (m, 3H, Aromatic H).

HPLC trace:

Daicel chiralcel OJ-H, hexane/*i*-PrOH = 95/5, 220 nm, 1.0 mL/min.

*t*<sub>R1</sub> = 17.5 min (major), *t*<sub>R2</sub> = 23.9 min (minor)

ee = 88.8%.

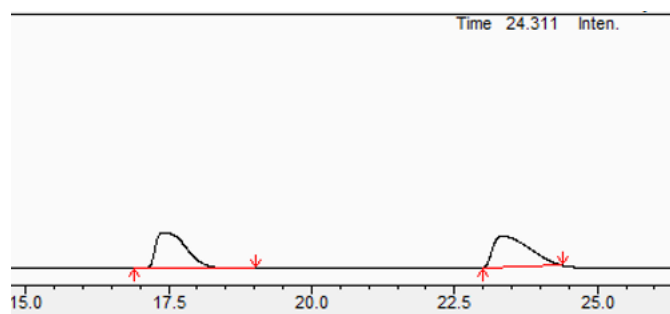

| 峰号 | 保留时间   | 面积        | 高度      | 标记 | 浓度      | 浓度单位 | 化合物ID号 | 化合物名 | 面积%     |
|----|--------|-----------|---------|----|---------|------|--------|------|---------|
| 1  | 17.428 | 108316047 | 2955125 | M  | 49.015  |      |        |      | 49.015  |
| 2  | 23.347 | 112667848 | 2565653 | M  | 50.985  |      |        |      | 50.985  |
| 总计 |        | 220983896 | 5520778 |    | 100.000 |      |        |      | 100.000 |

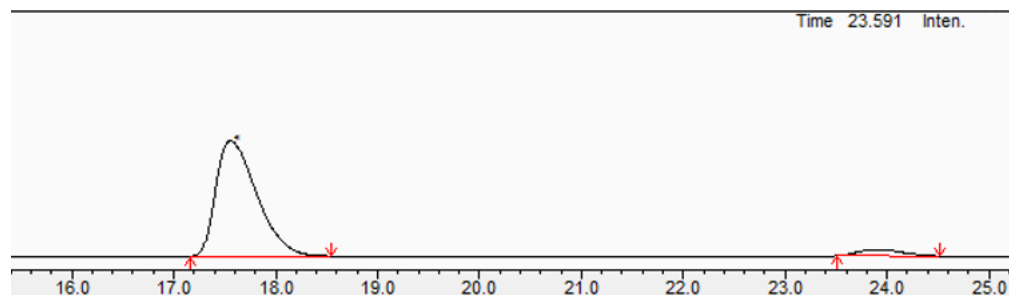

| 峰号 | 保留时间   | 面积       | 高度      | 标记 | 浓度      | 浓度单位 | 化合物ID号 | 化合物名 | 面积%     |
|----|--------|----------|---------|----|---------|------|--------|------|---------|
| 1  | 17.559 | 51900871 | 1855385 | M  | 94.409  |      |        |      | 94.409  |
| 2  | 23.908 | 3073584  | 104045  | M  | 5.591   |      |        |      | 5.591   |
| 总计 |        | 54974455 | 1959430 |    | 100.000 |      |        |      | 100.000 |

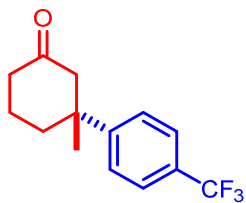

5e

Colorless oil, 86% yield.

The NMR data is in accordance with that of previous publications.<sup>[14, 16]</sup>

<sup>1</sup>H NMR (500 MHz, CDCl<sub>3</sub>), δ 1.34 (s, 3H, CH<sub>3</sub>), 1.62-1.67 (m, 2H), 1.89-1.98 (m, 2H), 2.19 (m, 1H), 2.32-2.36 (m, 2H), 2.48 (d, *J*=14.20 Hz, 1H), 2.88 (d, *J*=14.20 Hz, 1H), 7.44 (d, *J*=8.10 Hz, 2H, Aromatic H), 7.58 (d, *J*=7.75 Hz, 2H, Aromatic H).

HPLC trace:

Daicel chiralcel OJ-H, hexane/*i*-PrOH = 95/5, 220 nm, 1.0 mL/min.

*t*<sub>R1</sub> = 6.82 min (major), *t*<sub>R2</sub> = 6.49 min (minor)];

ee = 95.8%.

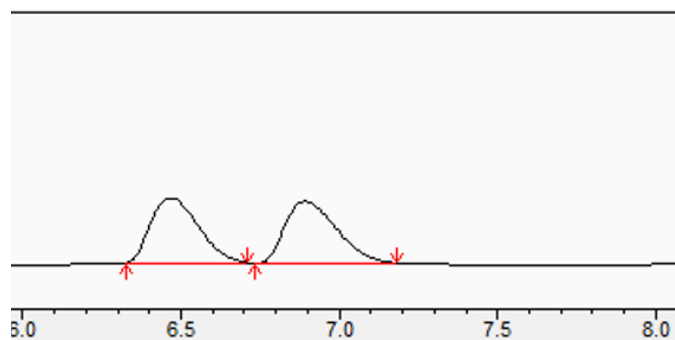

| 峰号 | 保留时间  | 面积       | 高度      | 标记 | 浓度      | 浓度单位 | 化合物ID号 | 化合物名 | 面积%     |
|----|-------|----------|---------|----|---------|------|--------|------|---------|
| 1  | 6.467 | 12334370 | 1182439 | M  | 49.220  |      |        |      | 49.220  |
| 2  | 6.893 | 12725158 | 1120766 | M  | 50.780  |      |        |      | 50.780  |
| 总计 |       | 25059528 | 2303205 |    | 100.000 |      |        |      | 100.000 |

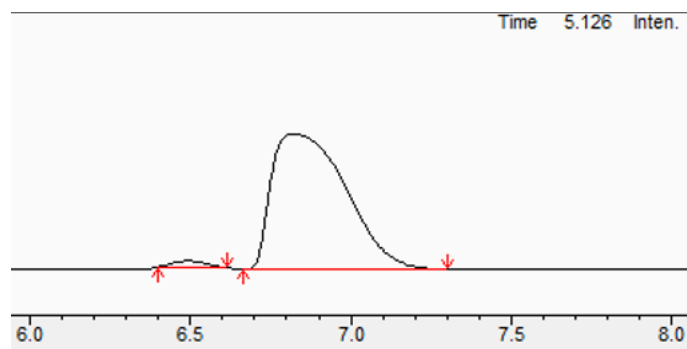

| 峰号 | 保留时间  | 面积       | 高度      | 标记 | 浓度      | 浓度单位 | 化合物ID号 | 化合物名 | 面积%     |
|----|-------|----------|---------|----|---------|------|--------|------|---------|
| 1  | 6.489 | 758881   | 103889  | M  | 2.100   |      |        |      | 2.100   |
| 2  | 6.822 | 35374690 | 2218226 | M  | 97.900  |      |        |      | 97.900  |
| 总计 |       | 36133572 | 2322115 |    | 100.000 |      |        |      | 100.000 |



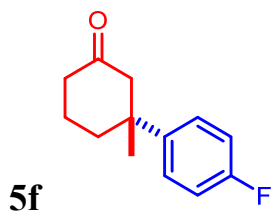

Colorless oil, 81% yield.

The NMR data is in accordance with that of previous publications.<sup>[14, 18]</sup>

<sup>1</sup>H NMR (400 MHz, CDCl<sub>3</sub>), δ 1.32 (s, 3H, CH<sub>3</sub>), 1.61-1.69 (m, 1H), 1.84-1.95 (m, 2H), 2.13-2.19 (m, 1H), 2.32 (t, *J*<sub>1</sub>=13.48 Hz, *J*<sub>2</sub>=6.74 Hz, 2H), 2.44 (d, *J*=10.12 Hz, 1H), 2.85 (d, *J*=14.20 Hz, 1H), 7.23-7.31 (m, 4H, Aromatic H).

HPLC trace:

Daicel chiralcel OJ-H, hexane/*i*-PrOH = 95/5, 220 nm, 0.9 mL/min.

*t*<sub>R1</sub> = 9.18 min (major), *t*<sub>R2</sub> = 10.8 min (minor)];

ee = 95.2%.

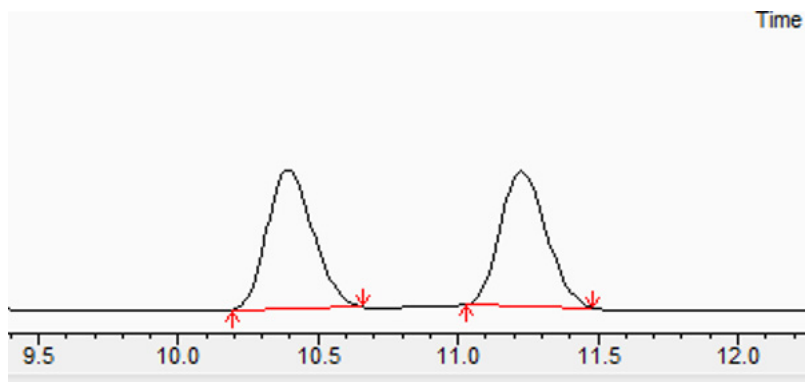

| 峰号 | 保留时间   | 面积      | 高度     | 标记 | 浓度      | 浓度单位 | 化合物ID号 | 化合物名 | 面积%     |
|----|--------|---------|--------|----|---------|------|--------|------|---------|
| 1  | 10.391 | 1174490 | 102700 | M  | 50.556  |      |        |      | 50.556  |
| 2  | 11.225 | 1148652 | 100320 | M  | 49.444  |      |        |      | 49.444  |
| 总计 |        | 2323142 | 203020 |    | 100.000 |      |        |      | 100.000 |

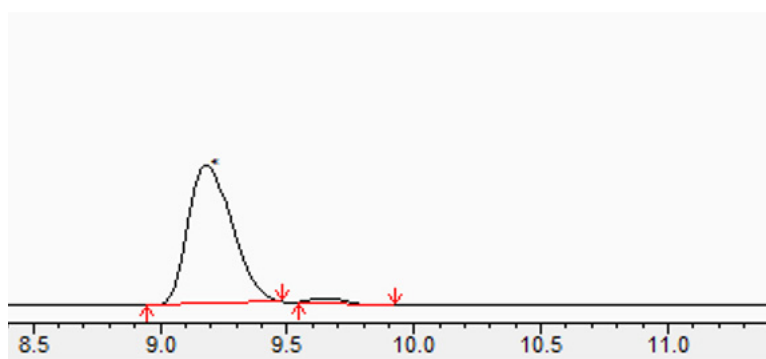

| 峰号 | 保留时间  | 面积      | 高度     | 标记 | 浓度      | 浓度单位 | 化合物ID号 | 化合物名 | 面积%     |
|----|-------|---------|--------|----|---------|------|--------|------|---------|
| 1  | 9.183 | 2896918 | 239620 | M  | 97.600  |      |        |      | 97.600  |
| 2  | 9.649 | 71223   | 8649   | M  | 2.400   |      |        |      | 2.400   |
| 总计 |       | 2968141 | 248269 |    | 100.000 |      |        |      | 100.000 |

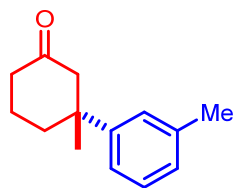

5g

Colorless oil, 73% yield.

The NMR data is in accordance with that of previous publication.<sup>[14]</sup>

<sup>1</sup>H NMR (500 MHz, CDCl<sub>3</sub>), δ 1.31 (s, 3H, CH<sub>3</sub>), 1.70 (m, 1H), 1.85-1.93 (m, 2H), 2.18 (m, 1H), 2.30-2.34 (m, 5H), 2.42 (d, *J*=14.15 Hz, 1H), 2.87 (d, *J*=14.20 Hz, 1H), 7.02 (d, *J*=7.60 Hz, 1H, Aromatic H), 7.11 (d, *J*=8.80 Hz, 2H, Aromatic H), 7.21 (m, 1H, Aromatic H).

HPLC trace:

Daicel chiralcel OJ-H, hexane/*i*-PrOH = 95/5, 220 nm, 1.0 mL/min.

*t*<sub>R1</sub> = 6.71 min (major), *t*<sub>R2</sub> = 7.42 min (minor)];

ee = 88.4%.

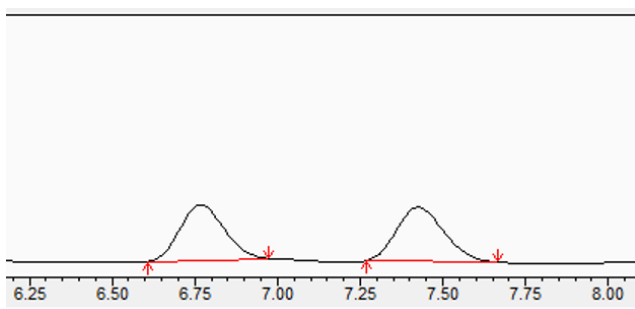

| 峰号 | 保留时间  | 面积     | 高度    | 标记 | 浓度      | 浓度单位 | 化合物ID号 | 化合物名 | 面积%     |
|----|-------|--------|-------|----|---------|------|--------|------|---------|
| 1  | 6.768 | 250555 | 26714 | M  | 48.798  |      |        |      | 48.798  |
| 2  | 7.425 | 262901 | 26292 | M  | 51.202  |      |        |      | 51.202  |
| 总计 |       | 513456 | 53006 |    | 100.000 |      |        |      | 100.000 |

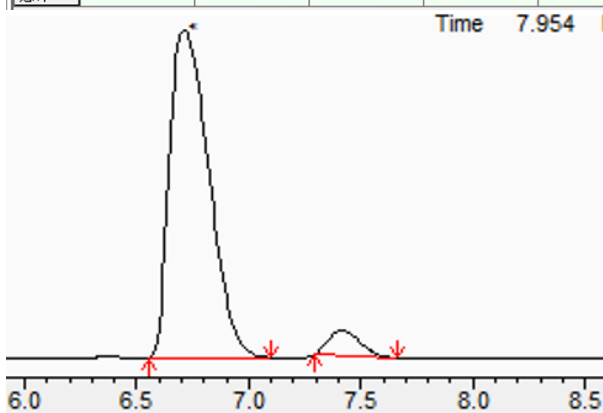

| 峰号 | 保留时间  | 面积       | 高度      | 标记 | 浓度      | 浓度单位 | 化合物ID号 | 化合物名 | 面积%     |
|----|-------|----------|---------|----|---------|------|--------|------|---------|
| 1  | 6.711 | 24673517 | 2021794 | M  | 94.225  |      |        |      | 94.225  |
| 2  | 7.416 | 1512188  | 156852  | M  | 5.775   |      |        |      | 5.775   |
| 总计 |       | 26185705 | 2178646 |    | 100.000 |      |        |      | 100.000 |

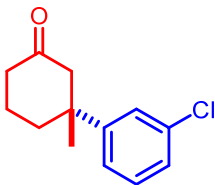

**5h**

Colorless oil, 88% yield.

The NMR data is in accordance with that of previous publications.<sup>[14-15]</sup>

<sup>1</sup>H NMR (500 MHz, CDCl<sub>3</sub>), δ 1.31 (s, 3H, CH<sub>3</sub>), 1.69 (m, 1H), 1.87-1.94 (m, 2H), 2.15 (m, 1H), 2.31-2.34 (m, 2H), 2.43 (d, *J*=14.15 Hz, 1H), 2.84 (d, *J*=14.15 Hz, 1H), 7.18-7.20 (m, 2H, Aromatic H), 7.25 (m, 1H, Aromatic H) 7.30 (s, 1H, Aromatic H).

HPLC trace:

Daicel chiralcel OJ-H, hexane/*i*-PrOH = 95/5, 220 nm, 0.9 mL/min.

*t*<sub>R1</sub> = 8.68 min (major), *t*<sub>R2</sub> = 9.14 min (minor)];

ee = 98.6%.

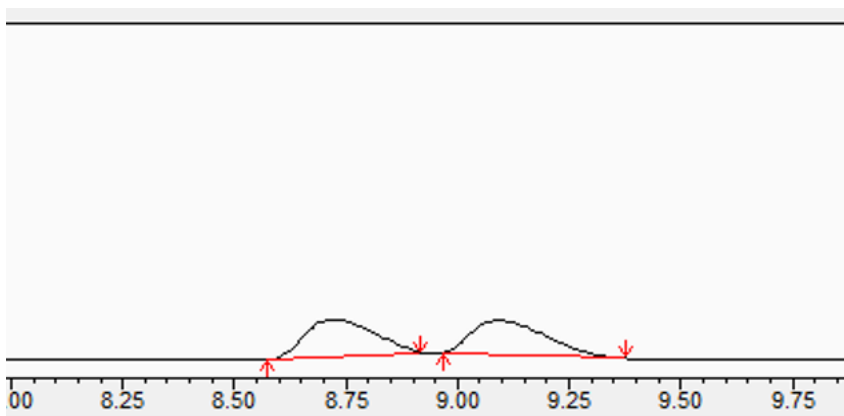

| 峰号 | 保留时间  | 面积       | 高度      | 标记 | 浓度      | 浓度单位 | 化合物ID号 | 化合物名 | 面积%     |
|----|-------|----------|---------|----|---------|------|--------|------|---------|
| 1  | 8.722 | 17233770 | 1622642 | M  | 49.360  |      |        |      | 49.360  |
| 2  | 9.094 | 17680500 | 1522708 | M  | 50.640  |      |        |      | 50.640  |
| 总计 |       | 34914270 | 3145550 |    | 100.000 |      |        |      | 100.000 |

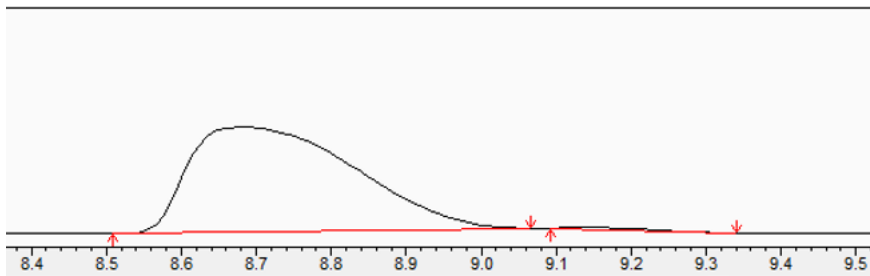

| 峰号 | 保留时间  | 面积       | 高度      | 标记 | 浓度      | 浓度单位 | 化合物ID号 | 化合物名 | 面积%     |
|----|-------|----------|---------|----|---------|------|--------|------|---------|
| 1  | 8.681 | 36838698 | 2402542 | M  | 99.300  |      |        |      | 99.300  |
| 2  | 9.143 | 259805   | 36243   | M  | 0.700   |      |        |      | 0.700   |
| 总计 |       | 37098503 | 2438785 |    | 100.000 |      |        |      | 100.000 |

## Synthesis and Application of Chiral Ligands L12 and L13

### Synthesis of *N*-Methylated (*S*)-*t*Bu- $\beta^1$ -CarOx L12

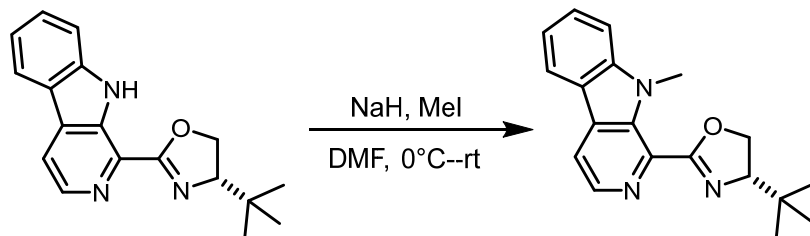

**L12** was synthesized following the reported procedure.<sup>[19]</sup> To a suspended solution of NaH (4.8 mg, 0.2 mmol) in DMF (1 mL), (*S*)-*t*Bu- $\beta^1$ -CarOx (29.3 mg, 0.1 mmol) in DMF (1 mL) was added dropwise at 0 °C. The heterogeneous mixture was stirred at 0 °C for 15 min and 1 h at room temperature. The mixture was then cooled to 0 °C, treated with iodomethane (10  $\mu$ L, 0.15 mmol), and allowed to warm to room temperature. After 6 h, the reaction mixture was cooled to 0 °C, quenched with saturated aqueous NH<sub>4</sub>Cl (3 mL), and extracted with ethyl acetate (3 $\times$ 5 mL). The organic layers were combined, washed with brine, dried over anhydrous Na<sub>2</sub>SO<sub>4</sub> and concentrated in vacuo. The resulting oil was purified by column chromatography on silica gel to give product *N*-Methylated (*S*)-*t*Bu- $\beta^1$ -CarOx **L12** as a white solid (56% yield).

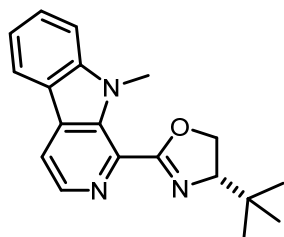

**L12**

#### (*S*)-4-(*tert*-butyl)-2-(9-methyl-9H-pyrido[3,4-*b*]indol-3-yl)-4,5-dihydrooxazole

<sup>1</sup>H NMR (500 MHz, CDCl<sub>3</sub>),  $\delta$  1.07 (s, 9H, 3  $\times$  CH<sub>3</sub>), 4.09 (s, 3H, N-CH<sub>3</sub>), 4.28 (dd,  $J_1 = 9.95$  Hz,  $J_2 = 9.95$  Hz, 1H), 4.35 (dd,  $J_1 = 9.95$  Hz,  $J_2 = 8.7$  Hz, 1H), 4.57 (dd,  $J_1 = 9.95$  Hz,  $J_2 = 8.7$  Hz, 1H), 7.32 (m, 1H), 7.48 (d,  $J = 8.20$  Hz, 1H) 7.62 (dd,  $J_1 = 7.85$  Hz,  $J_2 = 6.90$  Hz, 1H), 8.06 (s, 1H), 8.14 (d,  $J = 7.90$  Hz 1H), 8.54 (s, 1H).

<sup>13</sup>C NMR (125 MHz, CDCl<sub>3</sub>),  $\delta$  26.3, 32.9, 33.9, 68.9, 77.4, 109.8, 116.2, 120.2, 120.8, 121.5, 129.0, 131.1, 131.3, 135.8, 138.3, 143.1, 162.3.

HRESI-MS: calcd for C<sub>19</sub>H<sub>22</sub>N<sub>3</sub>O [M+H]<sup>+</sup>: 308.1764, found: 308.1658.

## Synthesis of Carbazole-Oxazoline Ligand **L13**

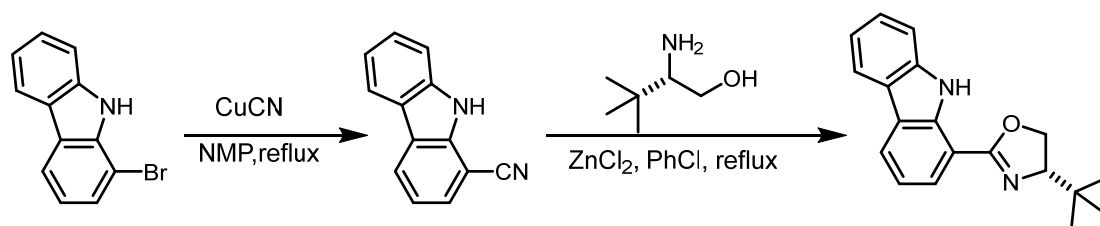

**L13** was synthesized following the reported procedure. [6], [20]

**Step 1**, To a suspended solution of CuCN (182 mg, 2.0 mmol) in NMP (3 mL), 1-Bromocarbazole (246 mg, 1.0 mmol) in 2 ml NMP was added dropwise, the reaction mixture was heated to reflux for 2h. The reaction mixture was then cooled to ambient temperature, quenched with H<sub>2</sub>O (3 mL), and extracted with ethyl acetate (3×5 mL). The organic layers were combined, washed with brine, dried over anhydrous Na<sub>2</sub>SO<sub>4</sub> and concentrated in vacuo. The resulting oil was purified by column chromatography on silica gel to give product 1-cyanide carbazole (yield: 68%, as white solid).

**Step 2**, To a suspended solution of *S*-tert-Leucinol (140 mg, 1.2 mmol) and ZnCl<sub>2</sub> (8.3 mg, 0.06 mmol) in PhCl (3 mL), 1-Cyanide carbazole (115 mg, 0.6 mmol) in 2 ml in PhCl was added dropwise, the reaction mixture was heated to reflux for 12h. The reaction mixture was then cooled to ambient temperature, quenched with H<sub>2</sub>O (3 mL), and extracted with ethyl acetate (3×5 mL). The organic layers were combined, washed with brine, dried over anhydrous Na<sub>2</sub>SO<sub>4</sub> and concentrated in vacuo. The resulting oil was purified by column chromatography on silica gel to give product C<sub>1</sub>-*S*-<sup>t</sup>Bu-Carbazole-Oxazoline Ligand (**L13**) (yield: 48 %, as white solid).

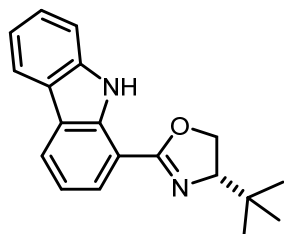

**L13**

### (*S*)-4-(*tert*-butyl)-2-(9H-carbazol-3-yl)-4,5-dihydrooxazole

<sup>1</sup>H NMR (500 MHz, CDCl<sub>3</sub>), δ 1.03 (s, 9H, 3 × CH<sub>3</sub>), 4.20 (dd, *J*<sub>1</sub> = 9.95 Hz, *J*<sub>2</sub> = 7.75 Hz, 1H), 4.28 (t, *J*<sub>1</sub> = 7.75 Hz, *J*<sub>2</sub> = 8.25 Hz, 1H), 4.40 (dd, *J*<sub>1</sub> = 9.95 Hz, *J*<sub>2</sub> = 8.25 Hz, 1H), 7.23 -7.27 (m, 2H), 7.46 (m, 1H), 7.54 (d, *J* = 8.05 Hz, 1H), 7.86 (d, dd, *J*<sub>1</sub> =

7.60 Hz,  $J_2 = 1.10$  Hz, 1H), 8.10 (d,  $J = 7.75$  Hz, 1H), 8.19 (d,  $J = 7.75$  Hz, 1H), 10.55 (s, 1H).

$^{13}\text{C}$  NMR (125 MHz,  $\text{CDCl}_3$ ),  $\delta$  26.0, 34.1, 68.1, 76.2, 109.5, 111.3, 118.3, 119.6, 120.5, 122.9, 123.4, 123.6, 125.3, 126.2, 139.2, 139.6, 163.1.

HRESI-MS: calcd for  $\text{C}_{19}\text{H}_{21}\text{N}_2\text{O}$   $[\text{M}+\text{H}]^+$ : 293.1655, found: 293.1658.

Application of **L12** and **L13** in the enantioselective synthesis of compound **3i**

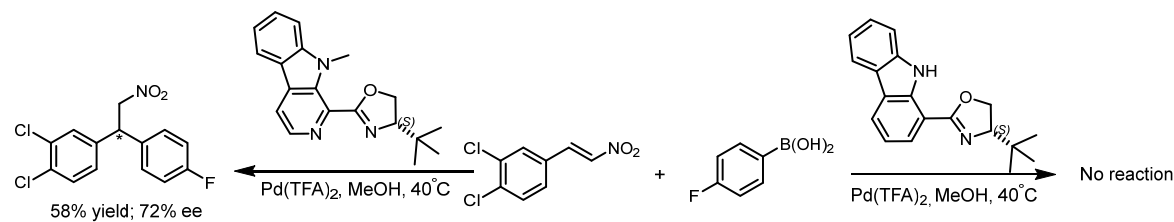

HPLC traces for the chiral ligand **L12**,

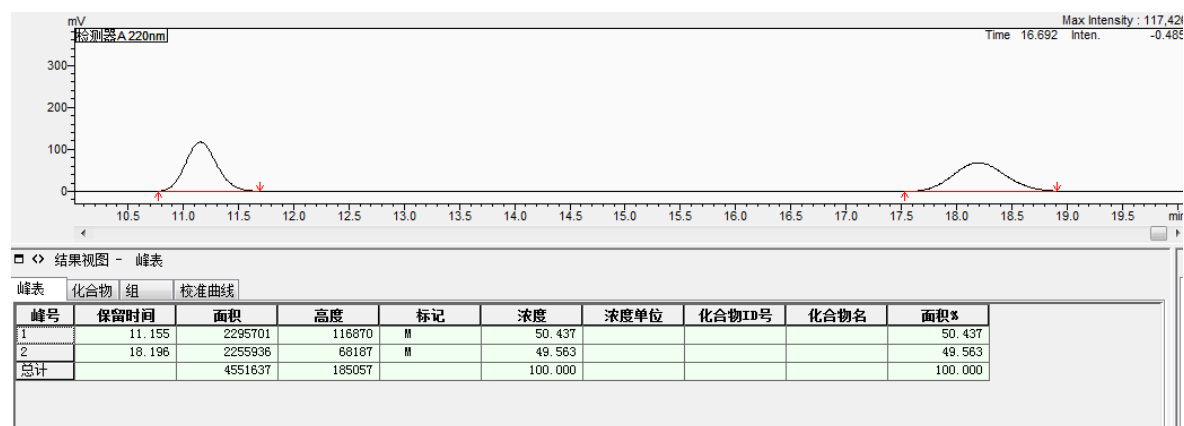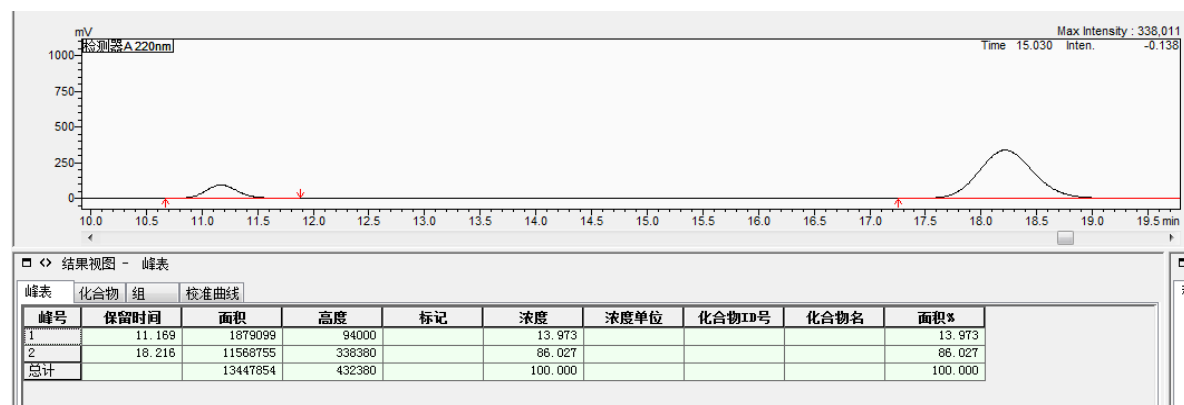

HPLC [Daicel chiralcel OD-H, hexane/*i*-PrOH = 70/30, 220 nm, 1.2 mL/min.  $t_{R1} = 11.17$  min (major),  $t_{R2} = 18.22$  min (minor)]; ee = 72.0%.

## Antifungal Bioassay of CarOx Ligands

### Compounds Selected for Biotest

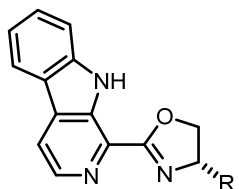

L1: (S)-Me- $\beta^1$ CarOx

L2: (S)-Et- $\beta^1$ CarOx

L3: (S)-iPr- $\beta^1$ CarOx

L4: (S)-iBu- $\beta^1$ CarOx

L5: (S)-sBu- $\beta^1$ CarOx

L6: (S)-tBu- $\beta^1$ CarOx

L7: (S)-Ph- $\beta^1$ CarOx

L8: (S)-Bn- $\beta^1$ CarOx

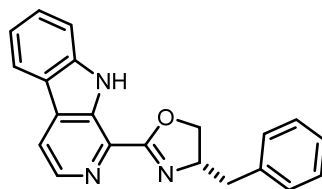

L9: (R)-Bn- $\beta^1$ CarOx

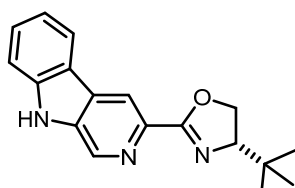

L10: (S)-tBu- $\beta^3$ CarOx

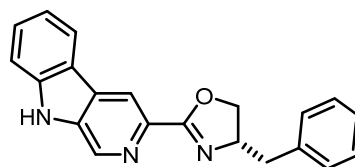

L11: (S)-Bn- $\beta^3$ CarOx

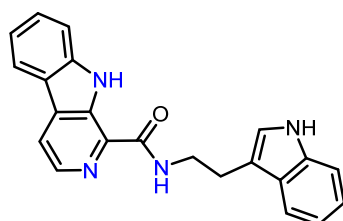

alangiobussinine

## Initial Screening

The antifungal activity of the target compounds was tested *in vitro* against the plant pathogenic fungi using the mycelium growth rate test. All the tested compounds were dissolved in DMSO at a concentration of  $\mu\text{g/mL}$ . The media containing compounds at a concentration of 50  $\mu\text{g/mL}$  were then poured into Petri dishes for initial screening.

$$\text{Inhibition rate (\%)} = (C - T) / (C - 5 \text{ mm}) \times 100\%$$

Where *C*: The average diameter (in mm) of mycelia in the blank test, *T*: The average diameter (in mm) of mycelia on treated PDA with tested compounds.

| Compd.           | Inhibitory Rate at 50 $\mu\text{g/mL}$ (%) |                                 |                         |                             |                             |                           |
|------------------|--------------------------------------------|---------------------------------|-------------------------|-----------------------------|-----------------------------|---------------------------|
|                  | <i>Rhizoctonia solani</i>                  | <i>Sclerotinia sclerotiorum</i> | <i>Botrytis cinerea</i> | <i>Fusarium graminearum</i> | <i>Phytophthora capsici</i> | <i>Magnaporthe oryzae</i> |
| L1               | 39.2                                       | 63.5                            | 57.8                    | 56.8                        | 65.1                        | 64.7                      |
| L2               | 66.3                                       | 86.5                            | 83.1                    | 71.4                        | 80.8                        | 87.2                      |
| L3               | 70.4                                       | 86.5                            | 98.0                    | 69.1                        | 87.8                        | 82.1                      |
| L4               | 94.9                                       | 70.2                            | 78.2                    | 45.5                        | 52.9                        | 57.1                      |
| L5               | 86.8                                       | 74.0                            | 71.7                    | 67.0                        | 63.9                        | 66.7                      |
| L6               | 69.4                                       | 92.3                            | 72.3                    | 66.7                        | 77.3                        | 70.5                      |
| L7               | 75.5                                       | 90.9                            | 59.4                    | 53.8                        | 55.8                        | 65.8                      |
| L8               | 61.8                                       | 54.5                            | 31.5                    | 52.9                        | 56.4                        | 51.9                      |
| L9               | 71.5                                       | 88.5                            | 61.2                    | 54.8                        | 74.4                        | 83.3                      |
| L10              | 64.2                                       | 47.8                            | 37.9                    | 60.0                        | 46.5                        | 63.5                      |
| L11              | 78.1                                       | 92.5                            | 63.7                    | 60.0                        | 62.1                        | 61.5                      |
| alangiobussinine | 33.5                                       | 48.9                            | 52.6                    | 52.3                        | 34.5                        | 52.5                      |



### Precise Antifungal Test

In the precision antifungal test, the 20 mg/mL stock solution was diluted to 50, 25, 12.5, 6.25, 3.125, 1.5625, 0.78125  $\mu\text{g/mL}$  and the above experiments were repeated for three times, the inhibition rates were calculated separately. The statistical analyses were performed by SPSS software version 20.0. Inhibition rate was calculated as follows,

$$\text{Inhibition rate (\%)} = (C-T) / (C-5 \text{ mm}) \times 100\%$$

Where C: The average diameter (in mm) of mycelia in the blank test, T: The average diameter (in mm) of mycelia on treated PDA with tested compounds.

EC<sub>50</sub> values ( $\mu\text{M}$ ) of the Selected Antifungal  $\beta$ -CarOx Ligands

| Compd.           | <i>Rhizoctonia solani</i> | <i>Sclerotinia sclerotiorum</i> | <i>Botrytis cinerea</i> | <i>Fusarium graminearum</i> | <i>Phytophthora capsici</i> | <i>Magnaporthe oryzae</i> |
|------------------|---------------------------|---------------------------------|-------------------------|-----------------------------|-----------------------------|---------------------------|
| <b>L2</b>        | 57.7                      | 22.4                            | 72.5                    | 66.4                        | 55.4                        | 55.5                      |
| <b>L3</b>        | 50.3                      | 15.5                            | 37.7                    | 60.9                        | 40.5                        | 54.1                      |
| <b>L5</b>        | 28.7                      | 17.7                            | 56.2                    | 67.3                        | 92.9                        | 47.5                      |
| <b>L6</b>        | 35.7                      | 13.0                            | 45.7                    | 92.9                        | 26.9                        | 42.7                      |
| <b>L7</b>        | 57.5                      | 17.3                            | 65.3                    | 104.8                       | 109.1                       | 38.6                      |
| <b>L9</b>        | 16.4                      | 12.0                            | 75.5                    | 84.5                        | 17.4                        | 36.6                      |
| alangiobussinine | >141.6                    | >141.6                          | >141.6                  | >141.6                      | >141.6                      | >141.6                    |
| <i>Boscalid</i>  | 4.6                       | 0.9                             | 4.9                     | 165.3                       | 7.4                         | 3.3                       |

## References

- [1]. Li, D.; Zhang, S.; Song, Z.; Wang, G.; Li, S., Bioactivity-guided mixed synthesis accelerate the serendipity in lead optimization: Discovery of fungicidal homodrimanyl amides. *Eur. J. Med. Chem.* **2017**, *136*, 114-121.
- [2]. Baiget, J.; Llona-Minguez, S.; Lang, S.; Mackay, S. P.; Suckling, C. J.; Sutcliffe, O. B., Manganese dioxide mediated one-pot synthesis of methyl 9H-pyrido[3,4-b]indole-1-carboxylate: Concise synthesis of alangiobussinine. *Beilstein J. Org. Chem.* **2011**, *7*, 1407-11.
- [3]. Miyamura, H.; Nishino, K.; Yasukawa, T.; Kobayashi, S., Rhodium-catalyzed asymmetric 1,4-addition reactions of aryl boronic acids with nitroalkenes: reaction mechanism and development of homogeneous and heterogeneous catalysts. *Chem. Sci.* **2017**, *8*, 8362–8372.
- [4]. Li, W.; Wang, G.; Lai, J.; Li, S., Multifunctional isoquinoline-oxazoline ligands of chemical and biological importance. *Chem. Commun.* **2019**, *55*, 5902-5905.
- [5]. Lang, F.; Chen, G.; Li, L.; Xing, J.; Han, F.; Cun, L.; Liao, J., Rhodium-Catalyzed Highly Enantioselective Addition of Arylboronic Acids to 2-Nitrostyrenes by tert-Butanesulfinylphosphine Ligand. *Chem. Eur. J.* **2011**, *17*, 5242-5245.
- [6]. He, Q.; Xie, F.; Fu, G.; Quan, M.; Shen, C.; Yang, G.; Gridnev, I. D.; Zhang, W., Palladium-Catalyzed Asymmetric Addition of Arylboronic Acids to Nitrostyrenes. *Org. Lett.* **2015**, *17* (9), 2250-2253.
- [7]. Jumde, V. R.; Iuliano, A., Deoxycholic Acid-Derived Biaryl Phosphites as Versatile and Enantioselective Ligands in the Rhodium-Catalyzed Conjugate Addition of Arylboronic Acids to Nitroalkenes. *Adv. Synth. Catal.* **2013**, *355* (17), 3475-3483.
- [8]. Huang, K.-C.; Gopula, B.; Kuo, T.-S.; Chiang, C.-W.; Wu, P.-Y.; Henschke, J. P.; Wu, H.-L., Rhodium-Catalyzed Asymmetric Addition of Arylboronic Acids to  $\beta$ -Nitroolefins: Formal Synthesis of (S)-SKF 38393. *Org. Lett.* **2013**, *15* (22), 5730-5733.
- [9]. Xue, F.; Wang, D.; Li, X.; Wan, B., Rhodium-Catalyzed Asymmetric Conjugate Addition of Arylboronic Acids to Nitroalkenes Using Olefin-Sulfoxide Ligands. *J. Org. Chem.* **2012**, *77* (7), 3071-3081.
- [10]. Liu, H.; Du, D.-M., Development of Diphenylamine-Linked Bis(imidazoline) Ligands and Their Application in Asymmetric Friedel–Crafts Alkylation of Indole Derivatives with Nitroalkenes. *Adv. Synth. Catal.* **2010**, *352*, 1113-1118.
- [11]. Venkatanna, K.; Kumar, S. Y.; Karthick, M.; Padmanaban, R.; Ramanathan, C. R., A chiral bicyclic skeleton-tethered bipyridine–Zn(OTf)<sub>2</sub> complex as a Lewis acid: enantioselective Friedel–Crafts alkylation of indoles with nitroalkenes *Org. Biomol. Chem.* **2019**, *17*, 4077-4086.
- [12]. Guo, F.; Lai, G.; Xiong, S.; Wang, S.; Wang, Z., Monodentate N-Ligand-Directed Bifunctional Transition-Metal Catalysis: Highly Enantioselective Friedel-Crafts Alkylation of Indoles with Nitroalkenes. *Chem. - Eur. J.* **2010**, *16* (22), 6438-6441.
- [13]. Itoh, J.; Fuchibe, K.; Akiyama, T., Chiral phosphoric acid catalyzed enantioselective Friedel-Crafts alkylation of indoles with nitroalkenes: cooperative effect of 3 Å molecular sieves. *Angew. Chem., Int. Ed.* **2008**, *47* (21), 4016-4018.
- [14]. Kikushima, K.; Holder, J. C.; Gatti, M.; Stoltz, B. M., Palladium-catalyzed asymmetric conjugate addition of arylboronic acids to five-, six-, and seven-membered  $\beta$ -substituted cyclic enones: enantioselective construction of all-carbon quaternary stereocenters. *J. Am. Chem. Soc.* **2011**, *133* (18), 6902-6905.

- [15]. Gottumukkala, A. L.; Matcha, K.; Lutz, M.; de Vries, J. G.; Minnaard, A. J., Palladium-Catalyzed Asymmetric Quaternary Stereocenter Formation. *Chem. - Eur. J.* **2012**, *18* (22), 6907-6914.
- [16]. Van Zeeland, R.; Stanley, L. M., Palladium-Catalyzed Conjugate Addition of Arylboronic Acids to  $\beta,\beta$ -Disubstituted Enones in Aqueous Media: Formation of Bis-benzylic and ortho-Substituted Benzylic Quaternary Centers. *ACS Catal.* **2015**, *5* (9), 5203-5206.
- [17]. Buter, J.; Moezelaar, R.; Minnaard, A. J., Enantioselective palladium catalyzed conjugate additions of ortho-substituted arylboronic acids to  $\beta,\beta$ -disubstituted cyclic enones: total synthesis of herbertenediol, enokipodin A and enokipodin B. *Org. Biomol. Chem.* **2014**, *12* (31), 5883-5890.
- [18]. Shintani, R.; Tsutsumi, Y.; Nagaosa, M.; Nishimura, T.; Hayashi, T., Sodium Tetraarylborates as Effective Nucleophiles in Rhodium/Diene-Catalyzed 1,4-Addition to  $\beta,\beta$ -Disubstituted  $\alpha,\beta$ -Unsaturated Ketones: Catalytic Asymmetric Construction of Quaternary Carbon Stereocenters. *J. Am. Chem. Soc.* **2009**, *131*, 13588-13589.
- [19]. Hao Wang.; Zibo Bai.; Tangqian Jiao.; Zhiqiang Deng.; Huarong Tong., Palladium-Catalyzed Amide-Directed Enantioselective Hydrocarbo-functionalization of Unactivated Alkenes Using a Chiral Monodentate Oxazoline Ligand. *J. Am. Chem. Soc.* **2018**, *140*, 10, 3542–3546.
- [20] Alicia Regueiro-Ren.; Qiufen M Xue.; Jacob J Swidorski.; Yi-Fei Gong.; Inhibitors of Human Immunodeficiency Virus Type 1 (HIV-1) Attachment. 12. Structure–Activity Relationships Associated with 4-Fluoro-6-azaindole Derivatives Leading to the Identification of 1-(4-Benzoylpiperazin-1-yl)-2-(4-fluoro-7-[1,2,3]triazol-1-yl)-1H-pyrrolo[2,3-c]pyridin-3-yl)ethane-1,2-dione (BMS-585248). *J. Med. Chem.* **2013**, *56*, 4, 1656–1669.

## NMR Spectra Traces

L1/L1HNMR  
K67

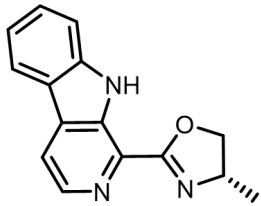

— 10.3599

8.5454  
8.5327  
8.1419  
8.1395  
8.1222  
8.1197  
8.0443  
8.0316  
7.5972  
7.5852  
7.5828  
7.5770  
7.5741  
7.5710  
7.3200  
7.3119  
7.3077  
7.3000  
7.2923  
7.2877  
7.2801  
7.2677

4.6861  
4.6665  
4.6627  
4.6435  
4.6137  
4.5975  
4.5953  
4.5900  
4.5794  
4.5739  
4.5719  
4.5562  
4.1379  
4.1189  
4.1001  
1.4831  
1.4670

1.00

0.92

1.01

0.94

2.02

1.01

1.03

0.95

0.99

3.00

11.0 10.5 10.0 9.5 9.0 8.5 8.0 7.5 7.0 6.5 6.0 5.5 5.0 4.5 4.0 3.5 3.0 2.5 2.0 1.5 1.0 0.5

f1 (ppm)

4500  
4000  
3500  
3000  
2500  
2000  
1500  
1000  
500  
0

L1/L1 CNMR  
K67

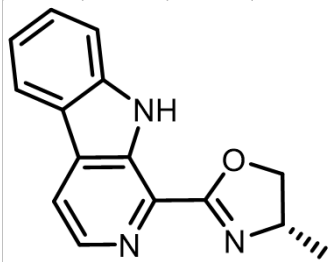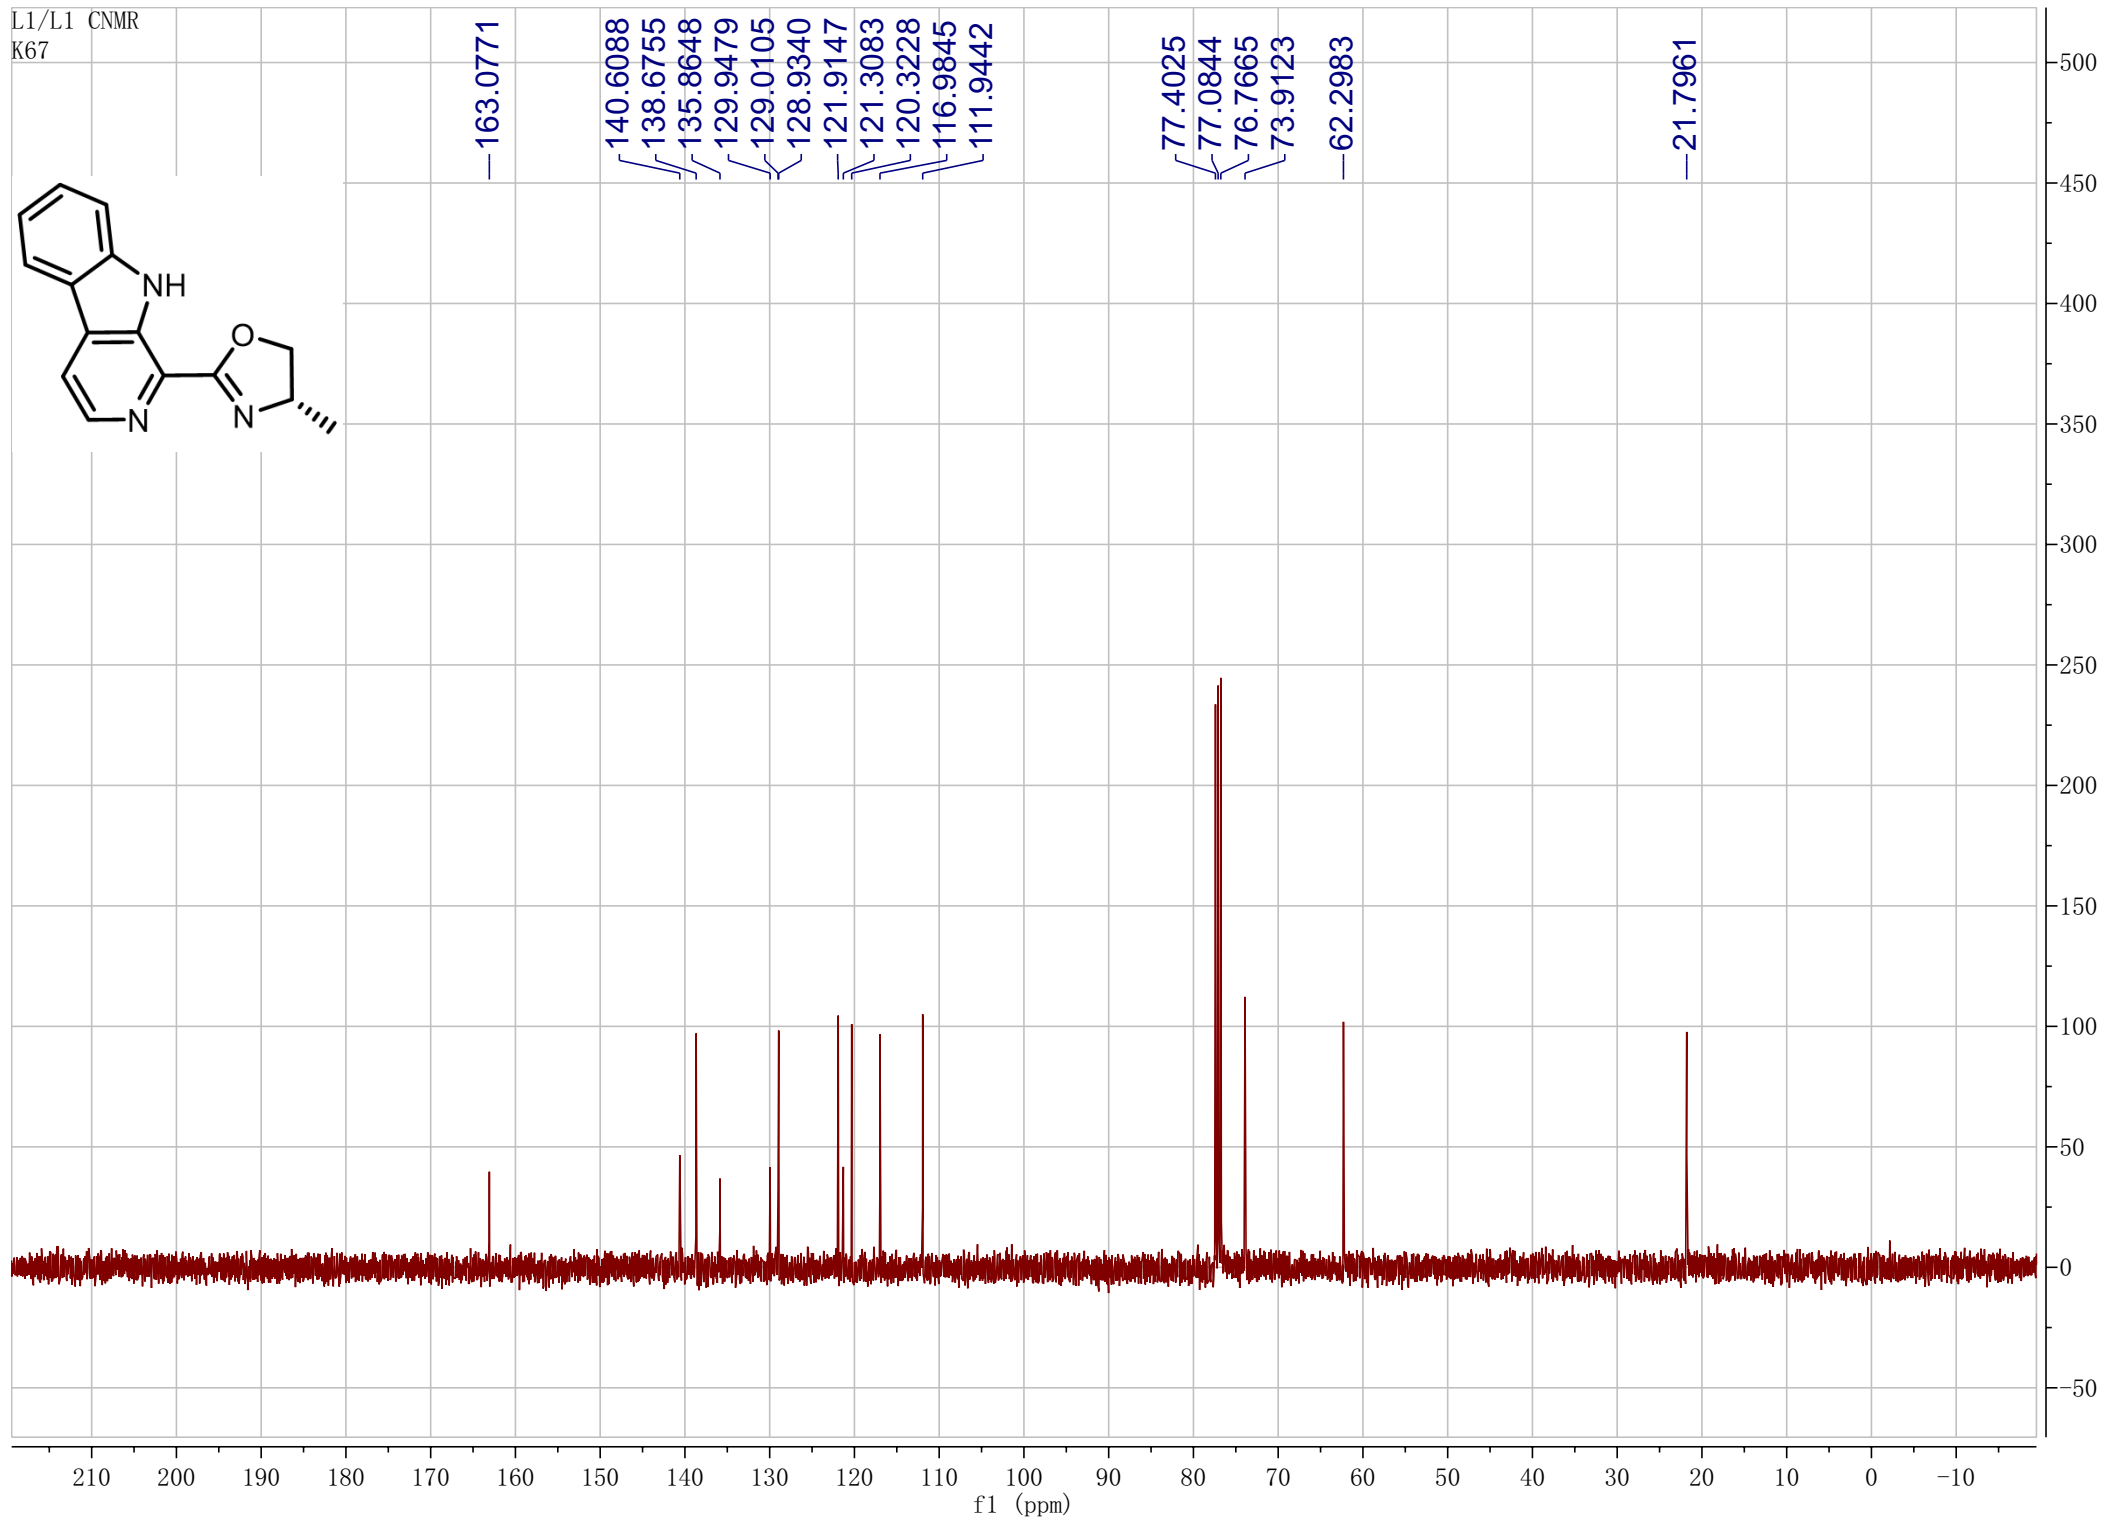

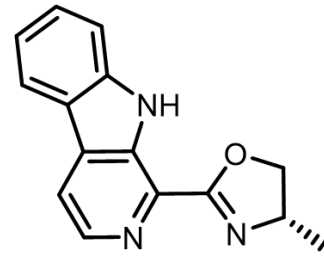

1: TOF MS ES+  
9.84e7

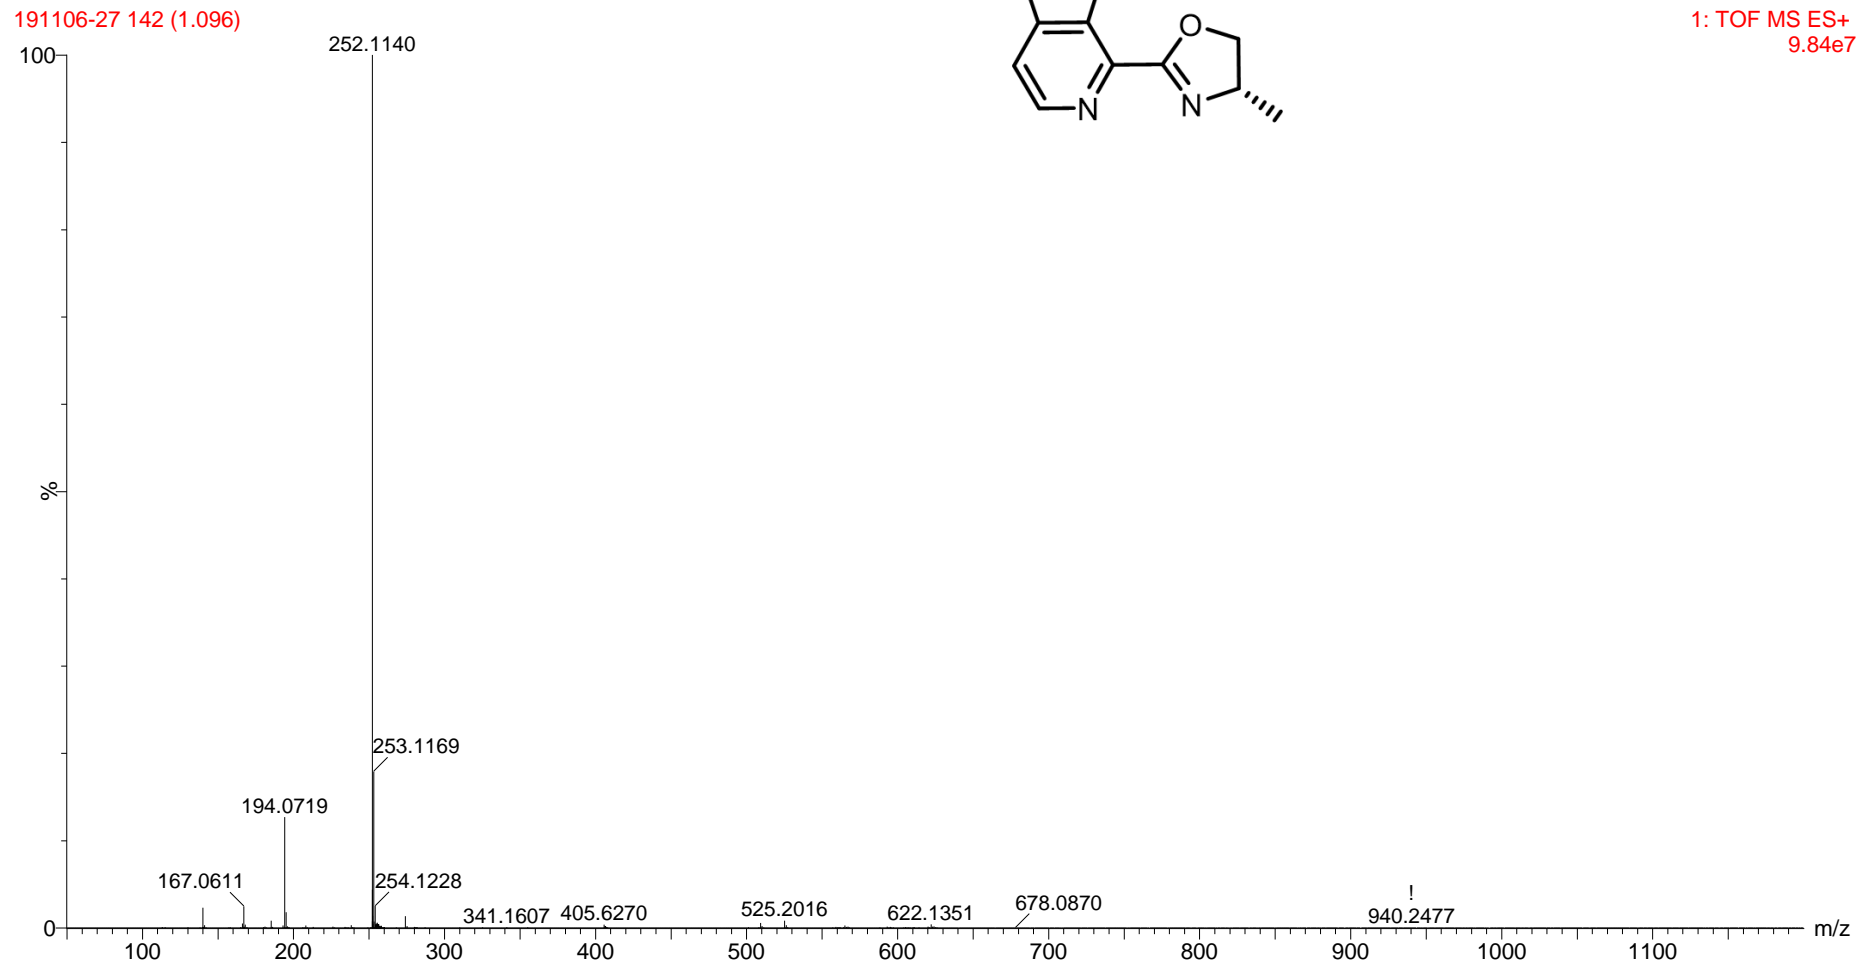

L2/4-2HNMR  
K15

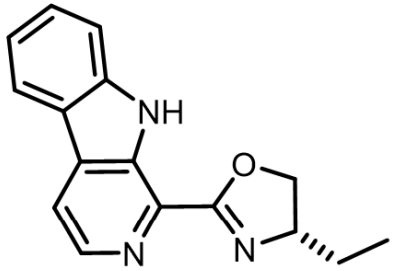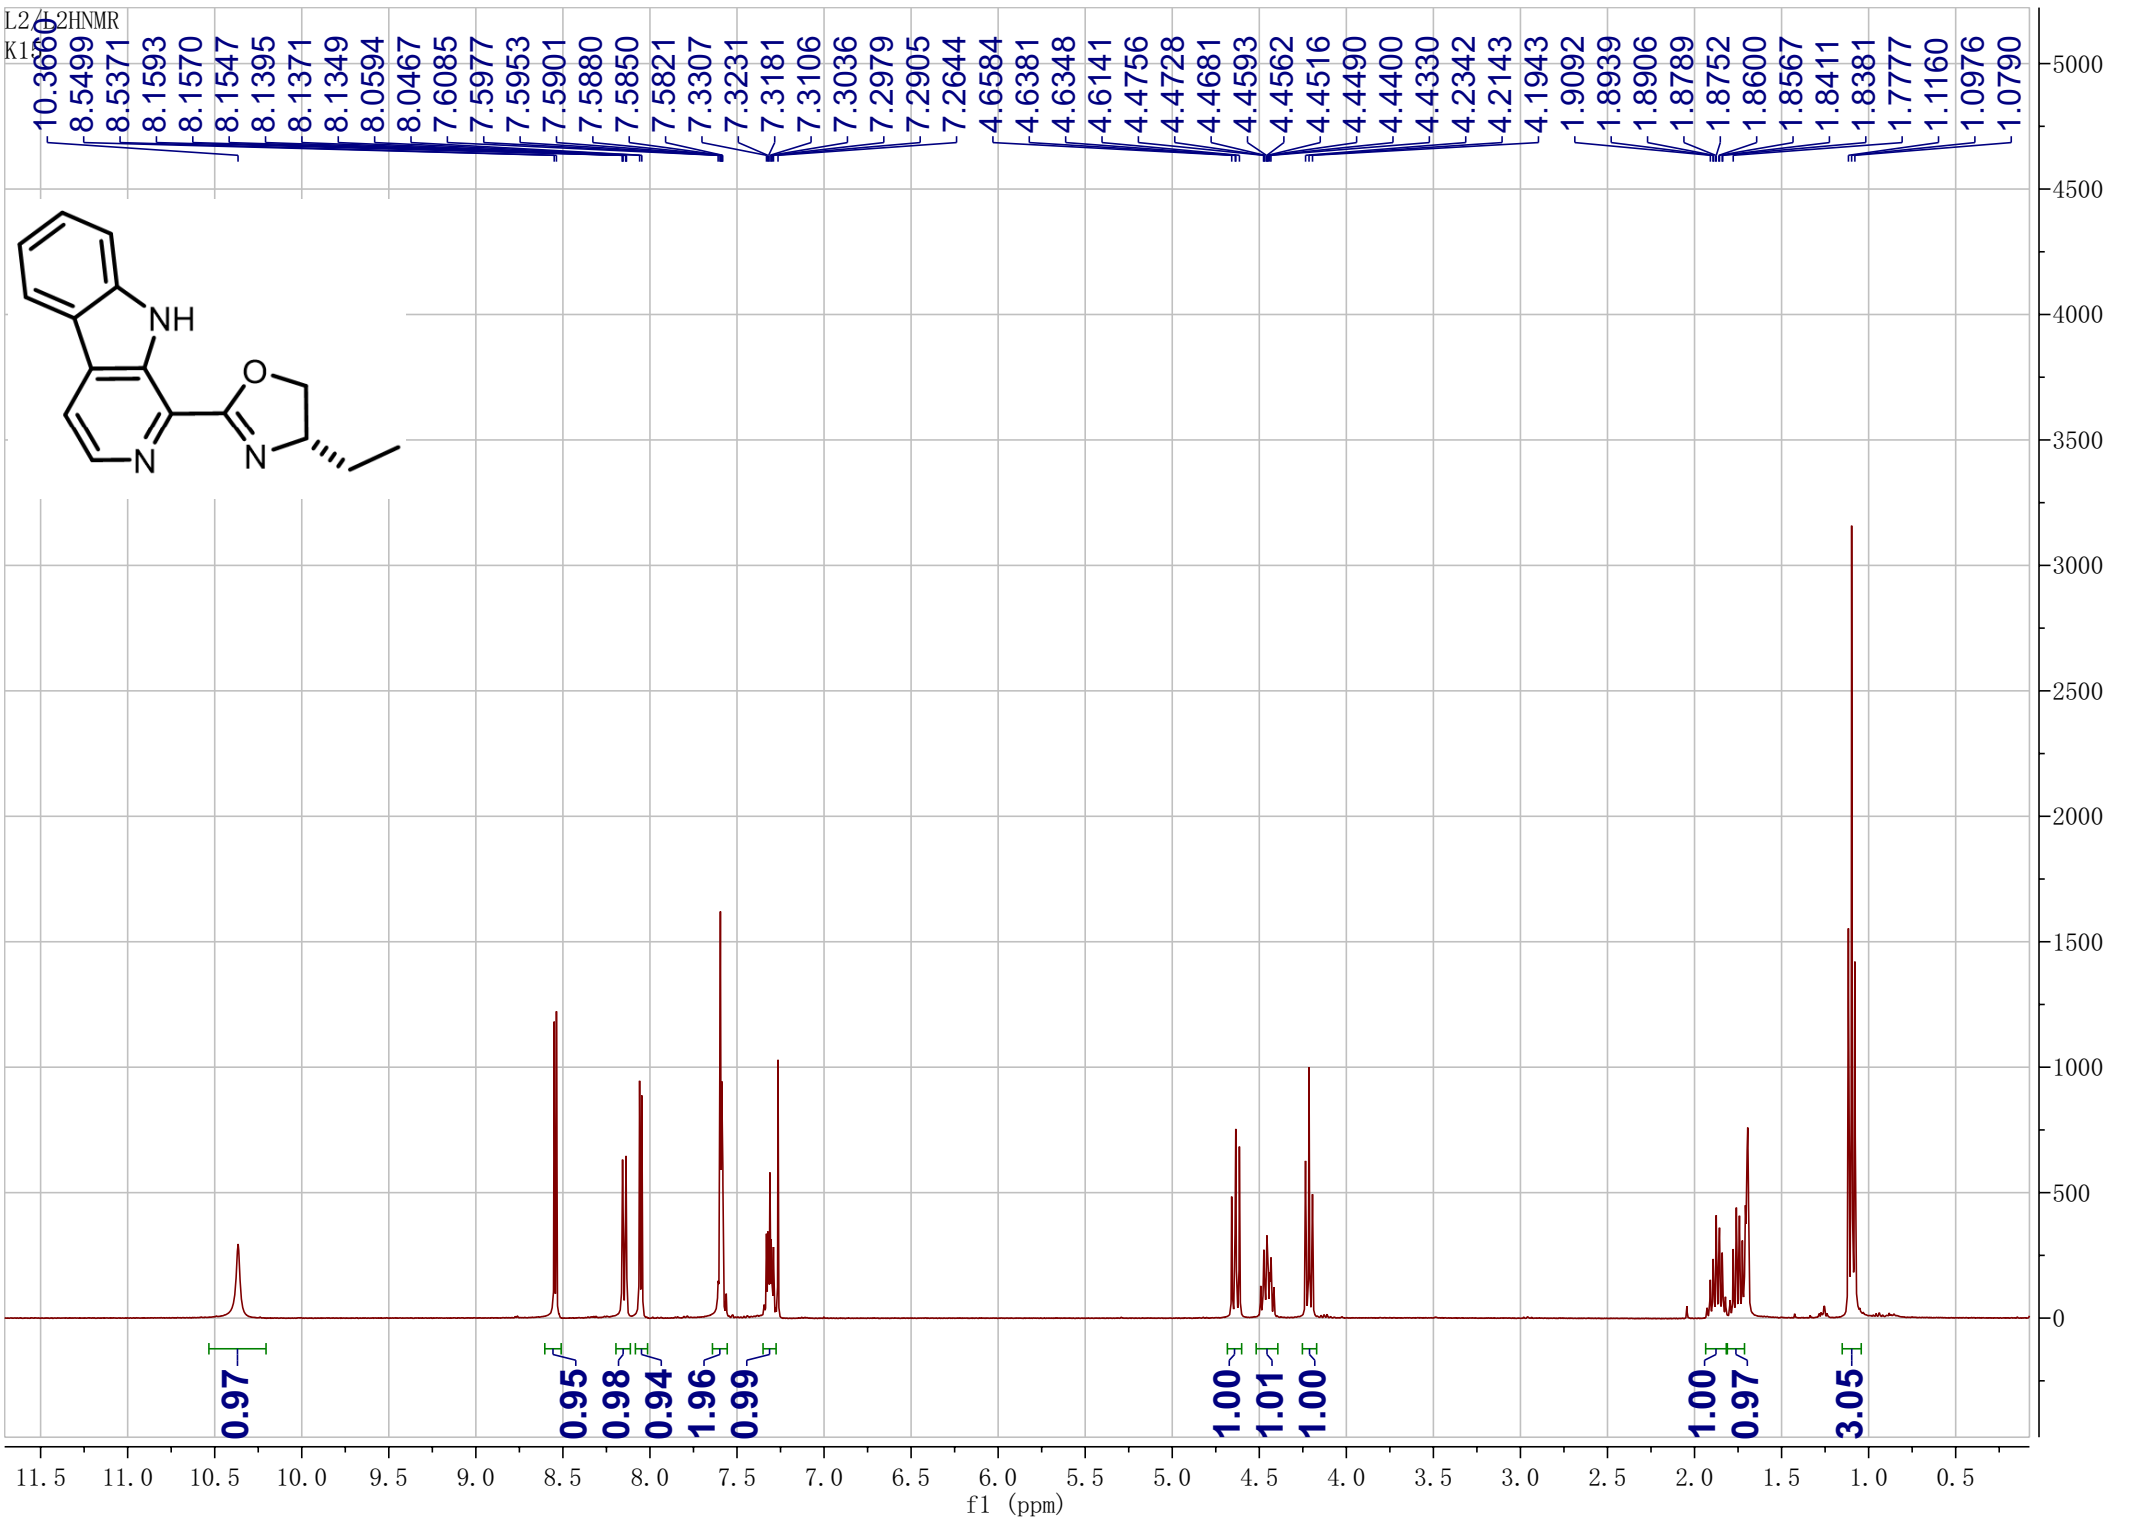

L2/CNMR L2  
k15

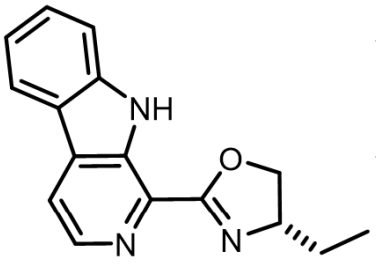

—163.1425

140.6056

138.6829

135.9014

129.9420

129.0698

128.9198

121.9207

121.3448

120.3262

116.9602

111.9509

—72.0828

—68.2516

—28.9107

—10.2612

f1 (ppm)

11000  
10000  
9000  
8000  
7000  
6000  
5000  
4000  
3000  
2000  
1000  
0  
-1000



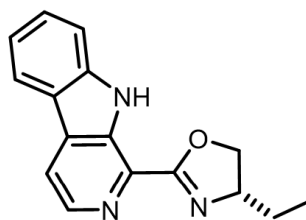

20190117-24 270 (2.030)

1: TOF MSES+  
1.77e7

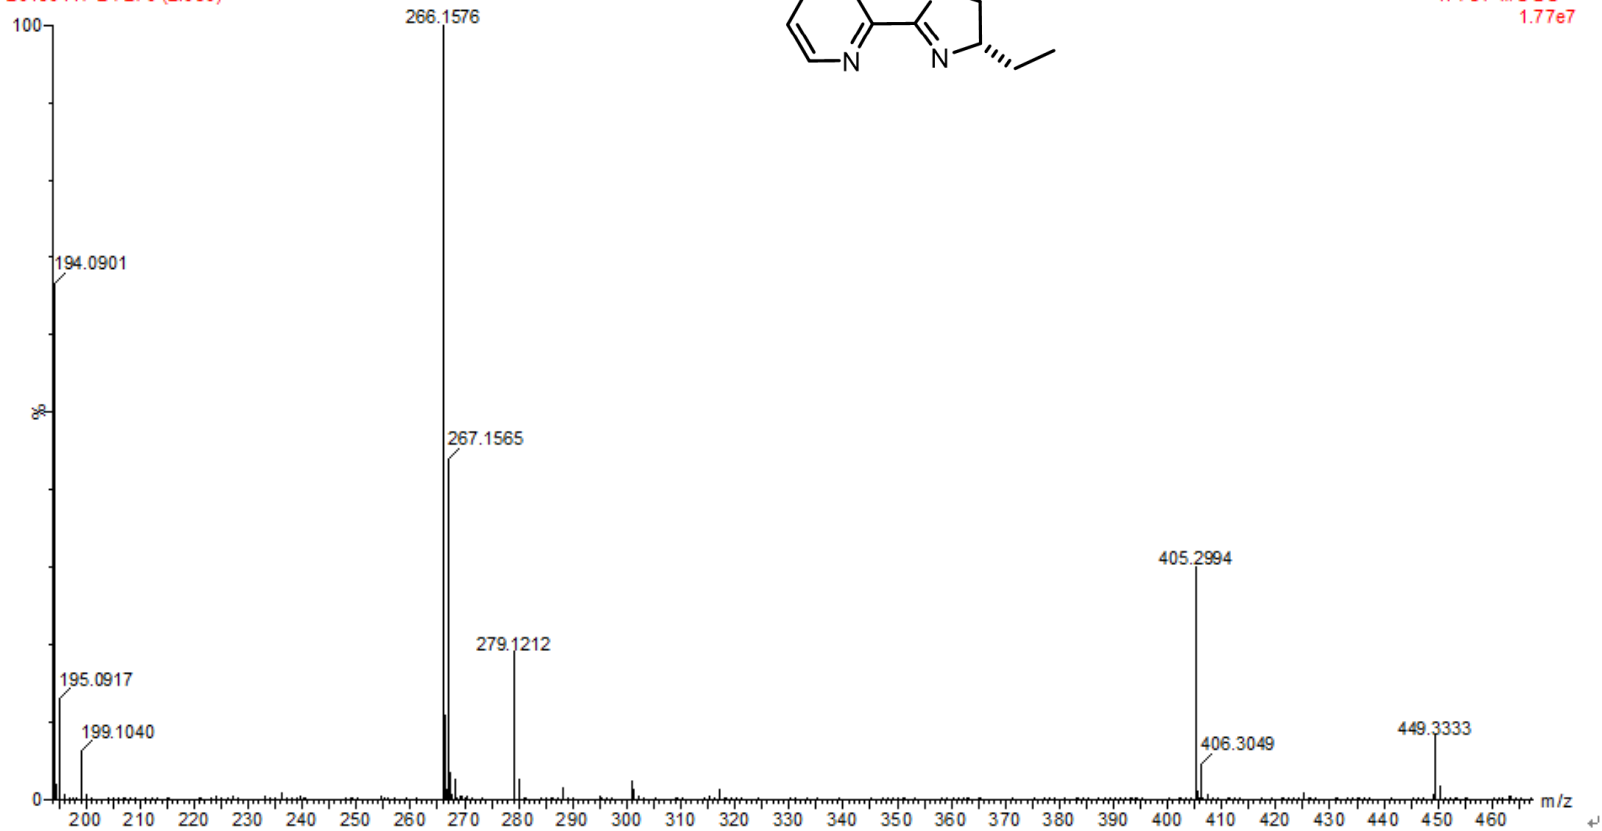

L2/L2-HNMR  
K34

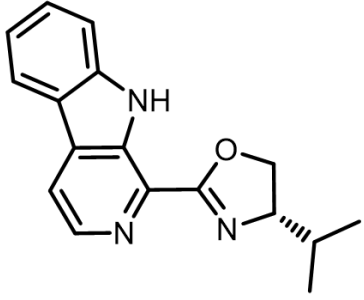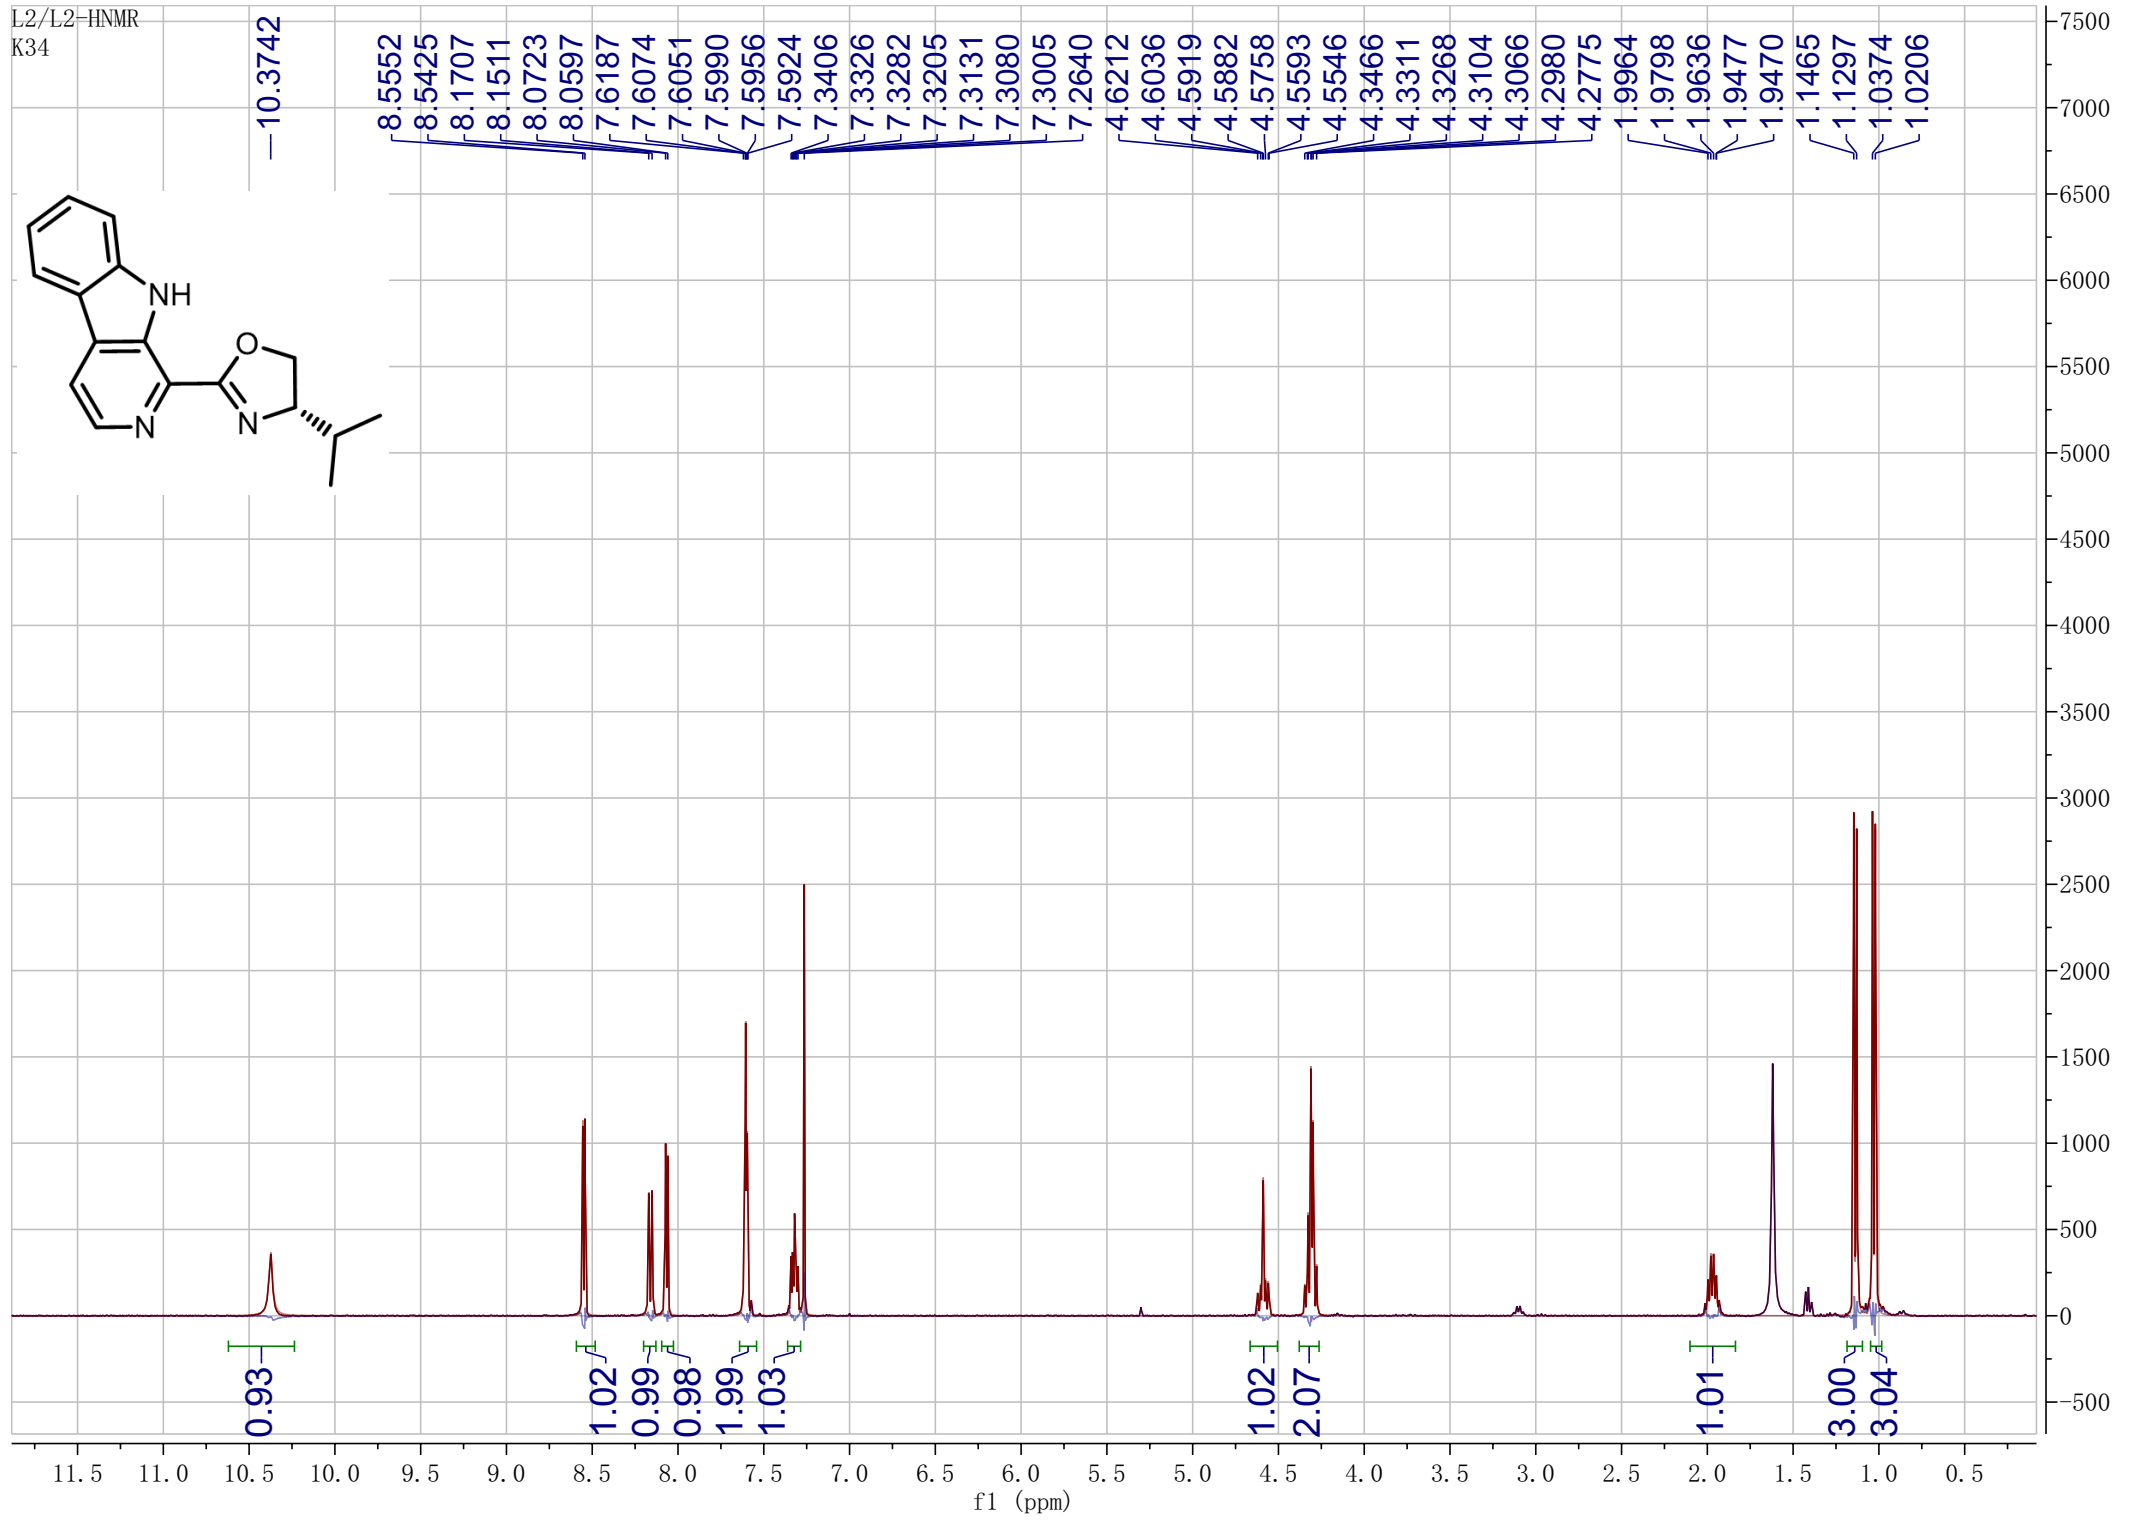

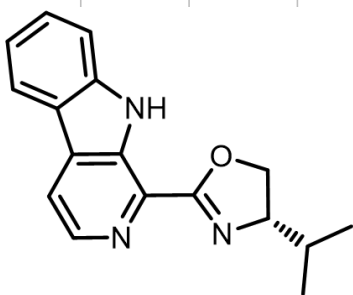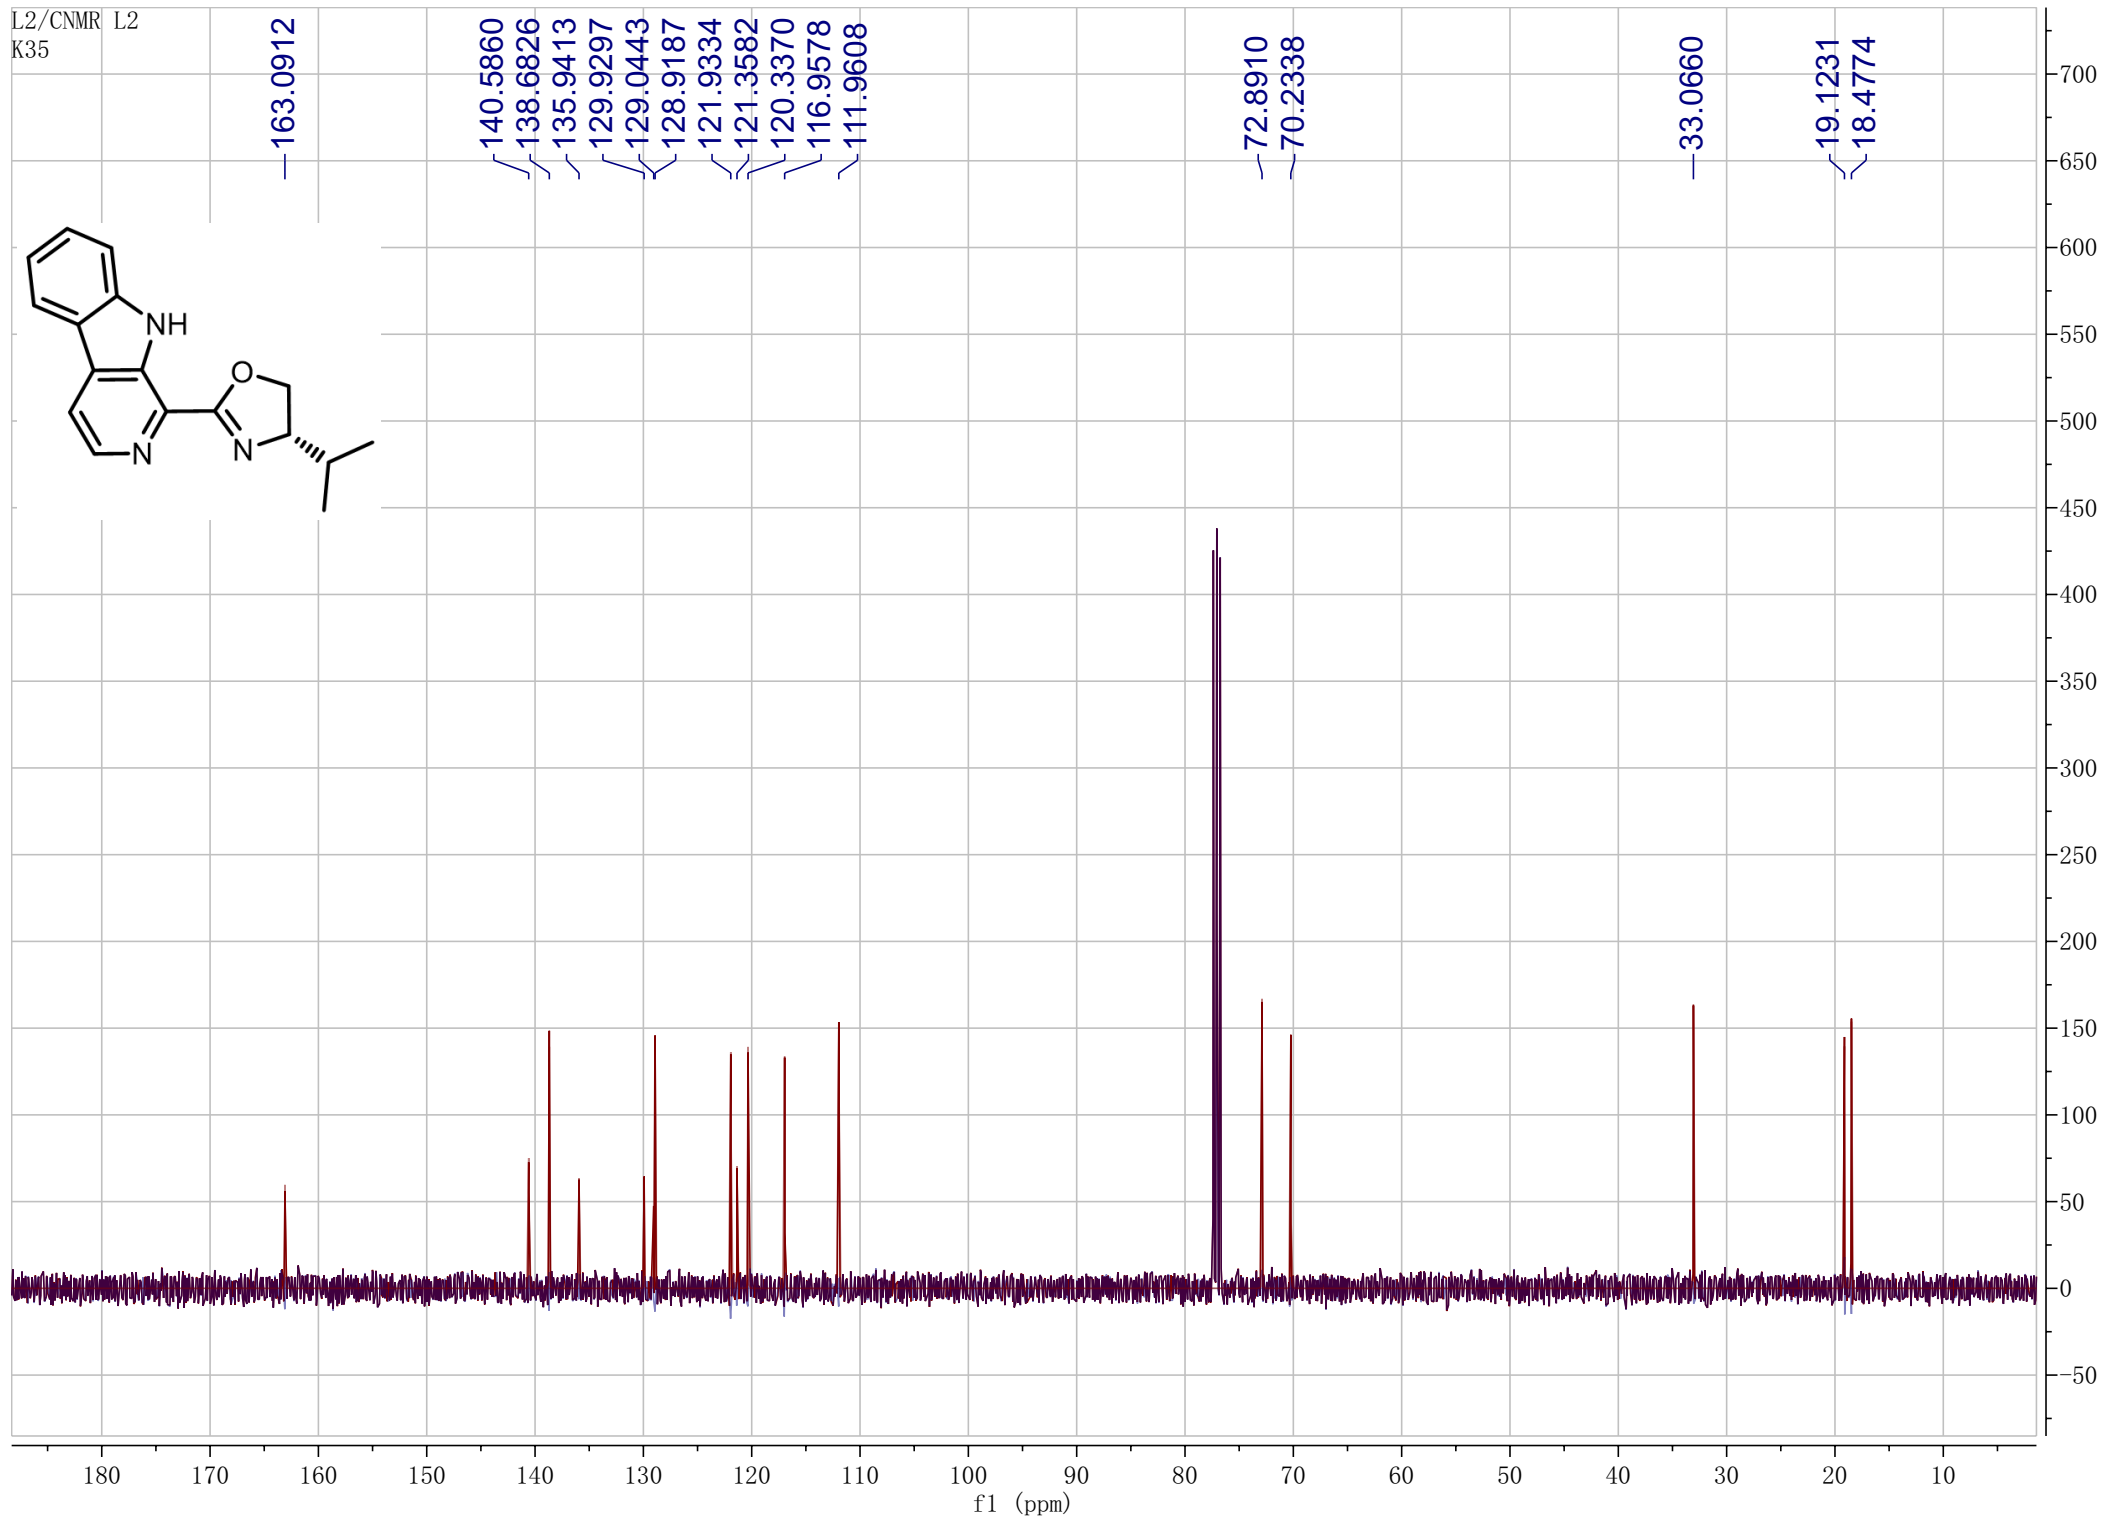

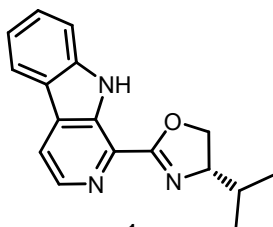

(S)-iPr- $\beta^1$ CarOx

20190506-20 231 (1.750)

1: TOF MS ES+  
4.30e7

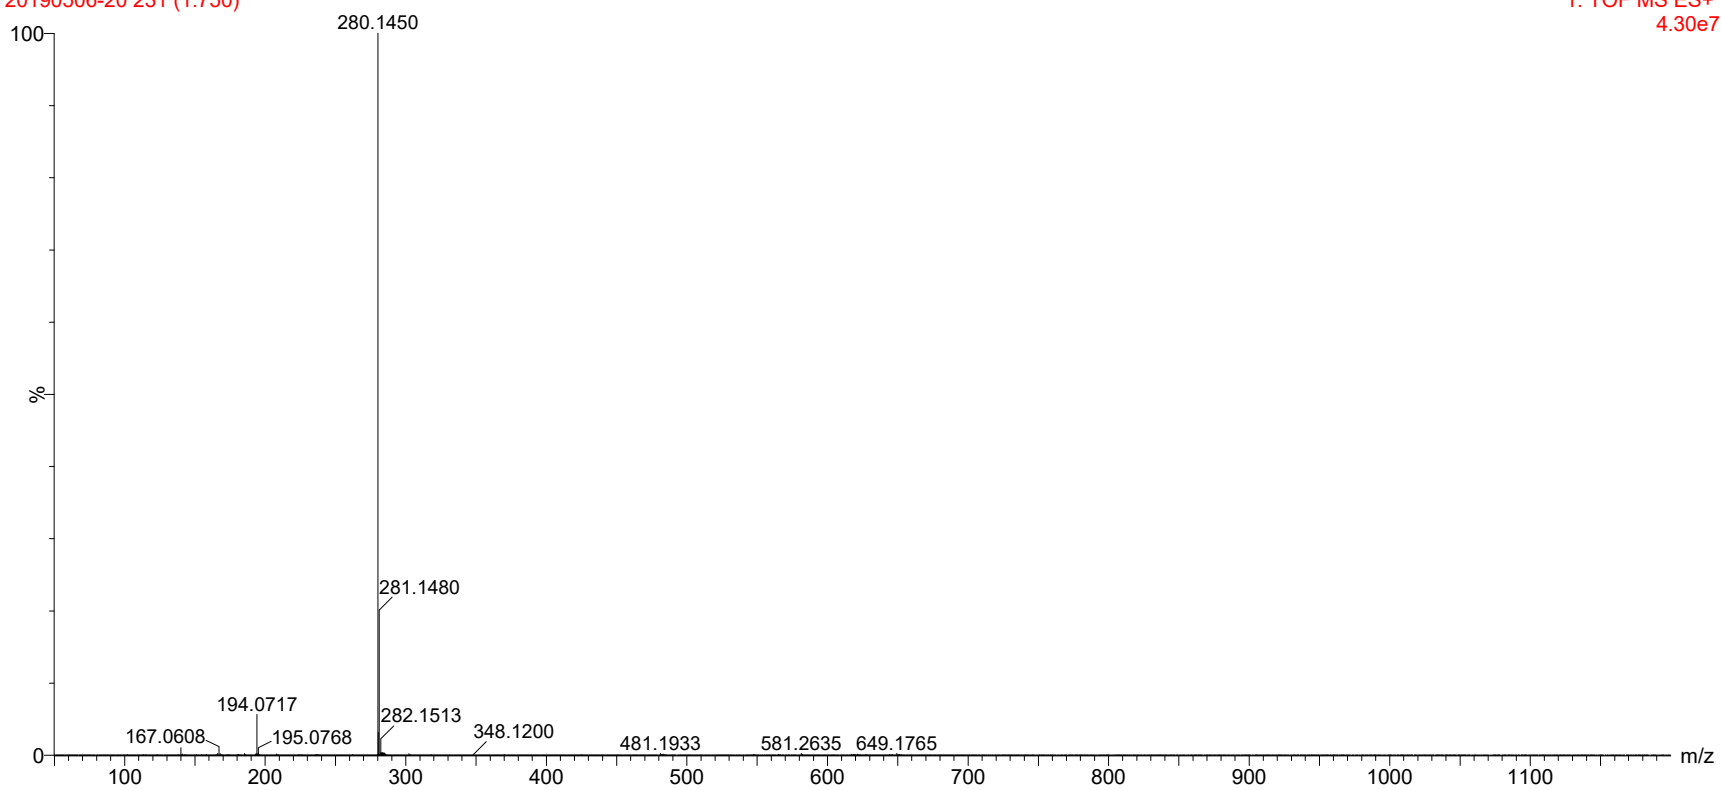

L4/L4 HNMR

K68

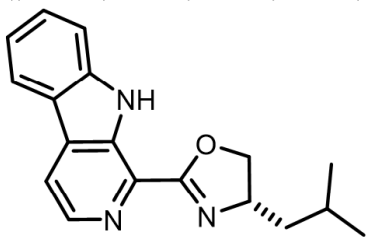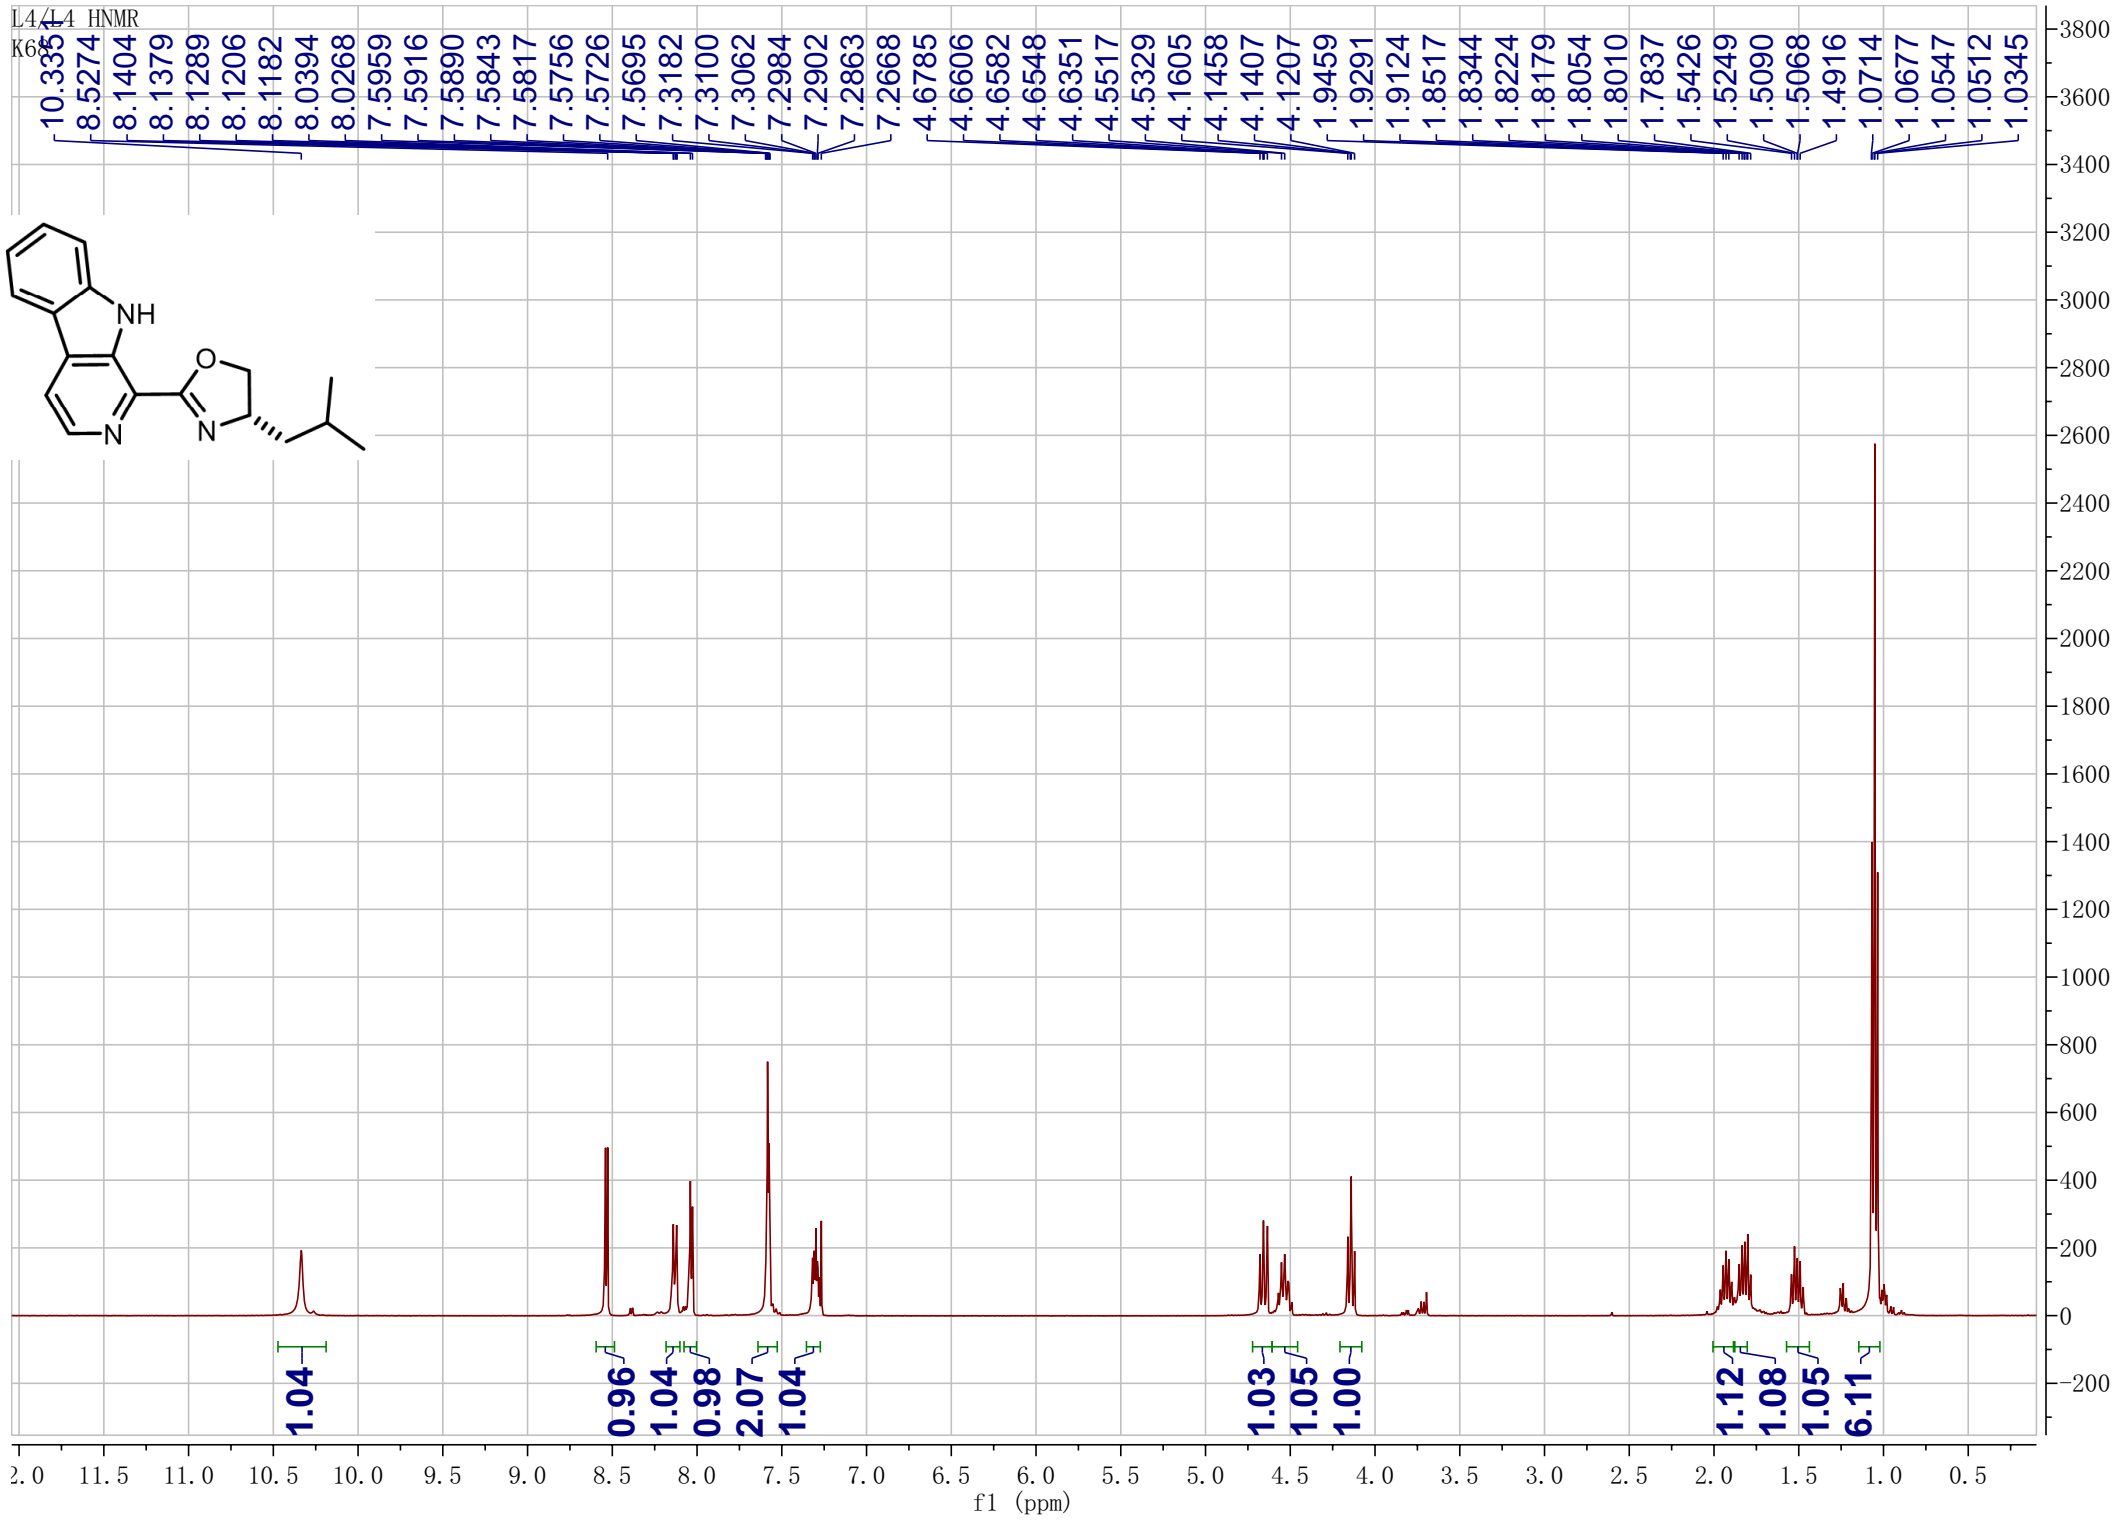

L4/L4 CNMR  
K68

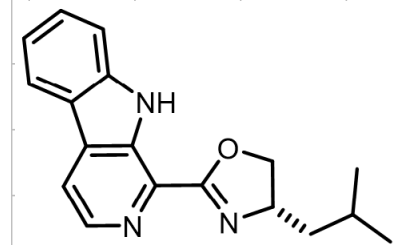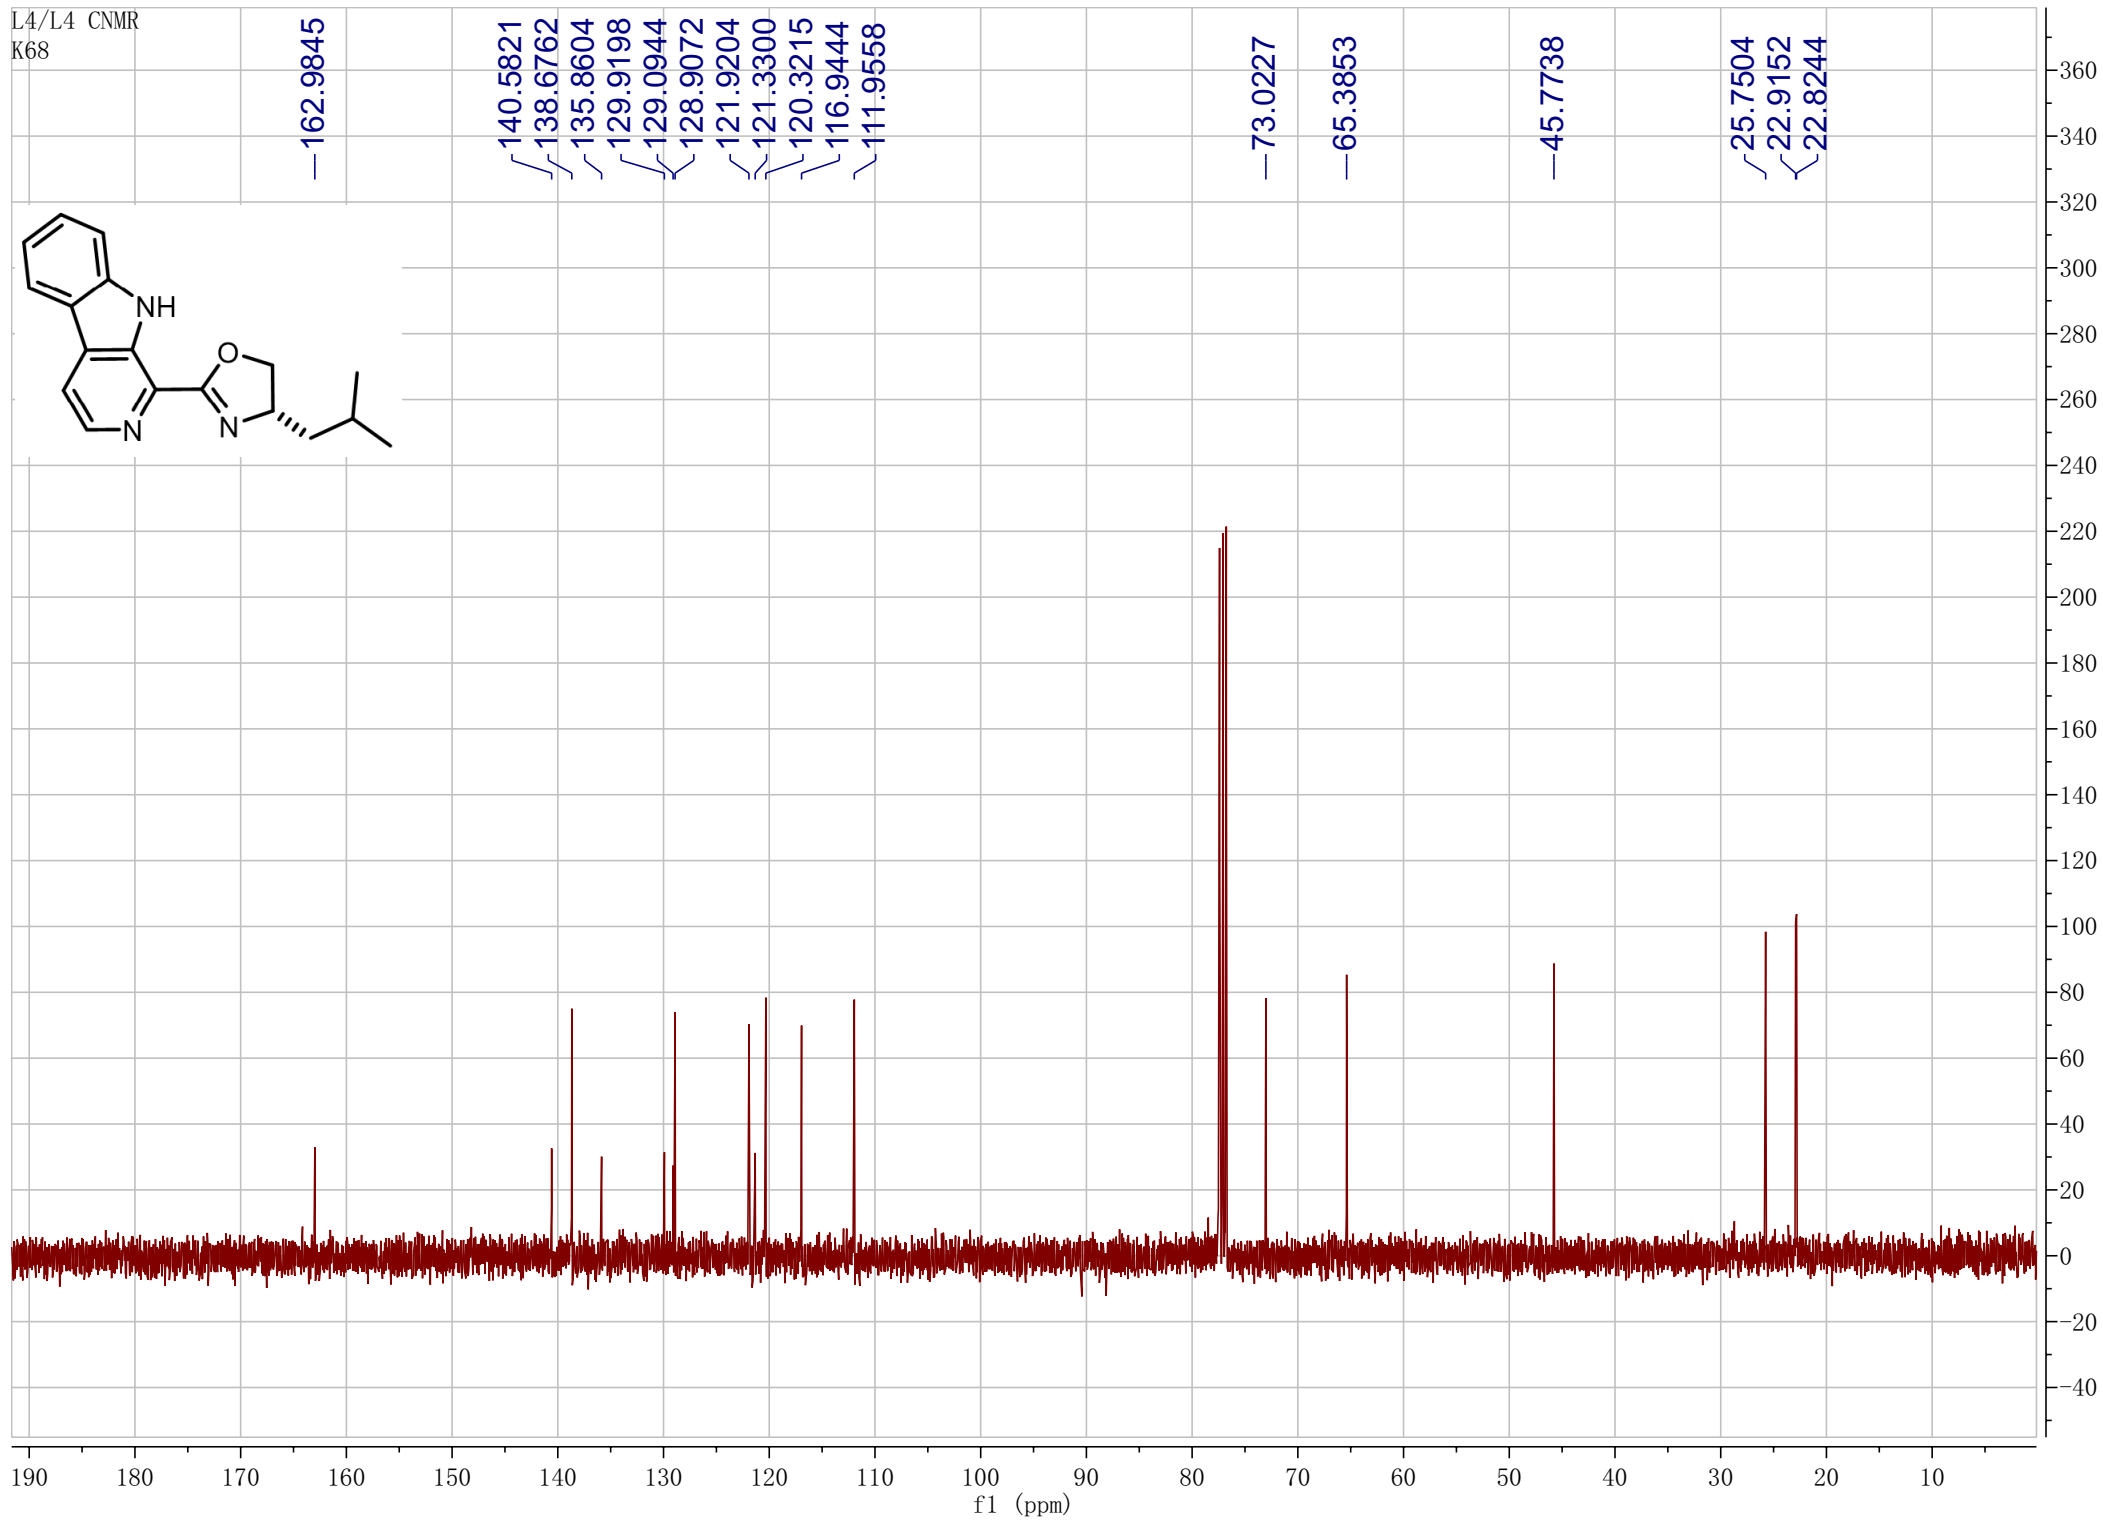

191106-28 215 (1.638)

1: TOF MS ES+  
3.29e7

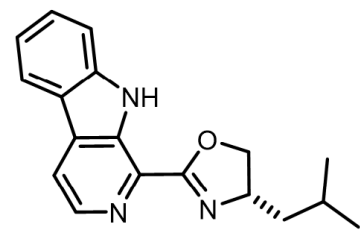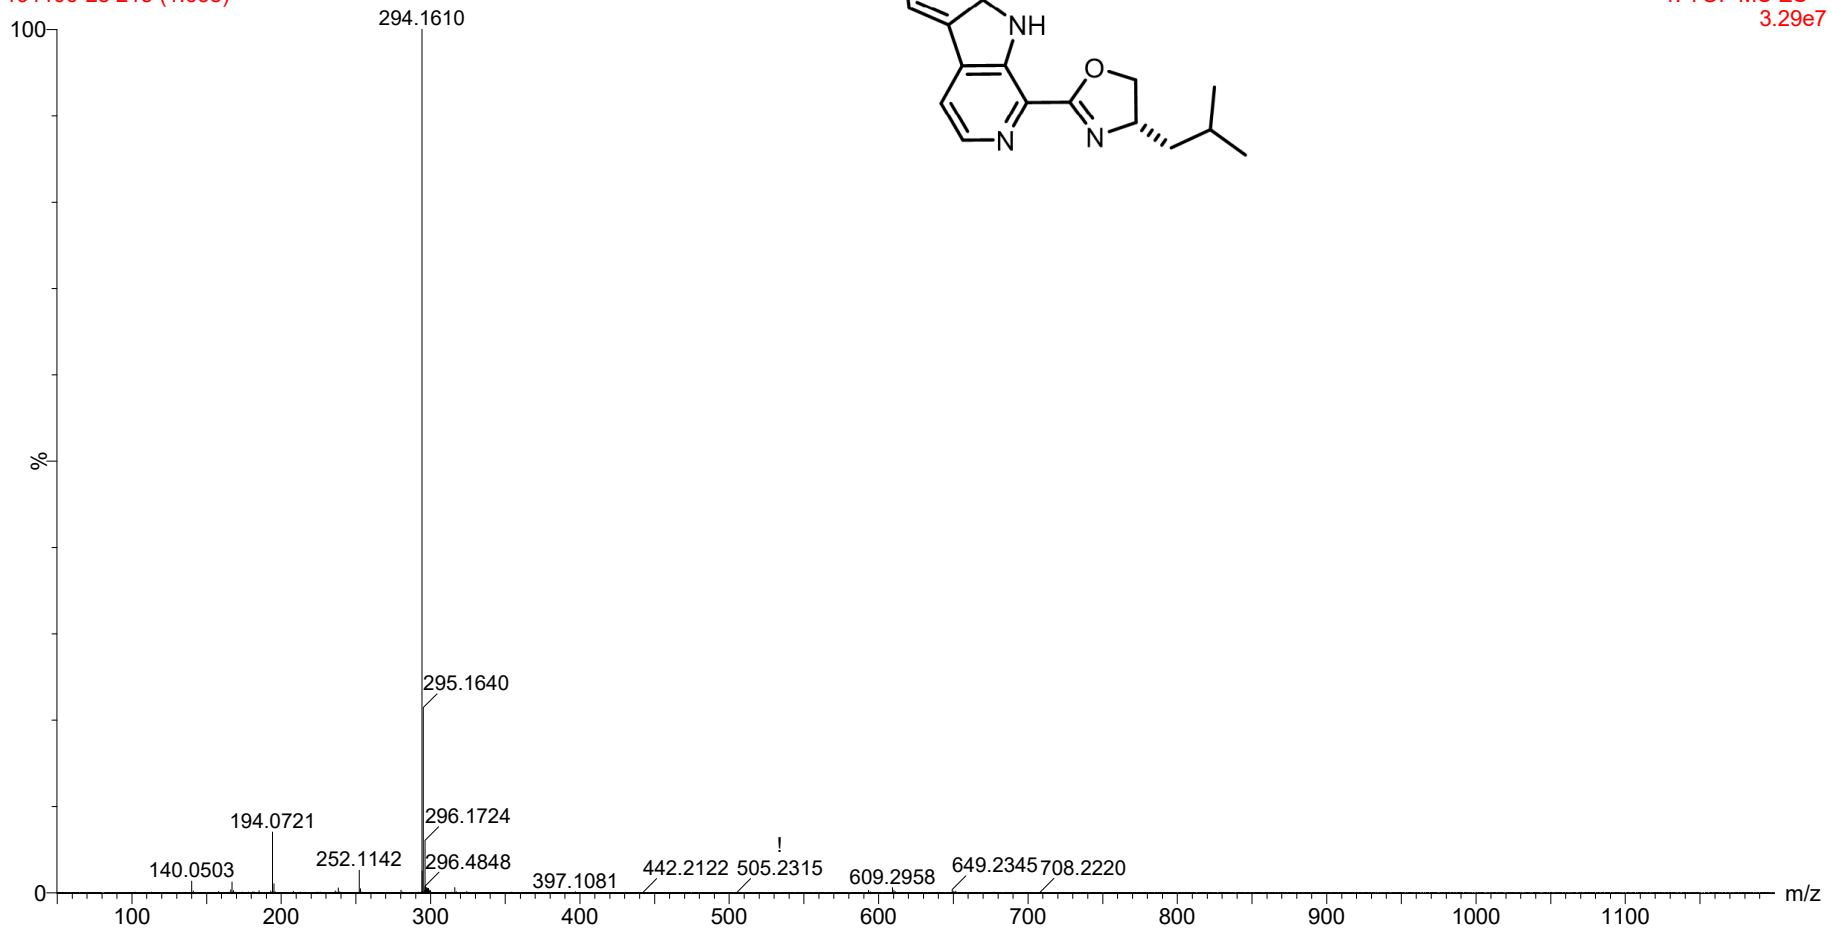

L5/L5 HNMR  
K7

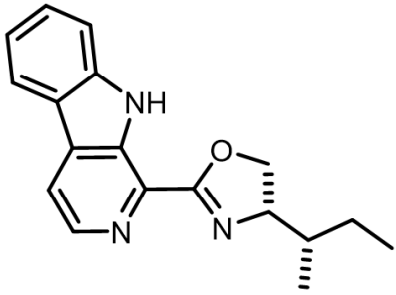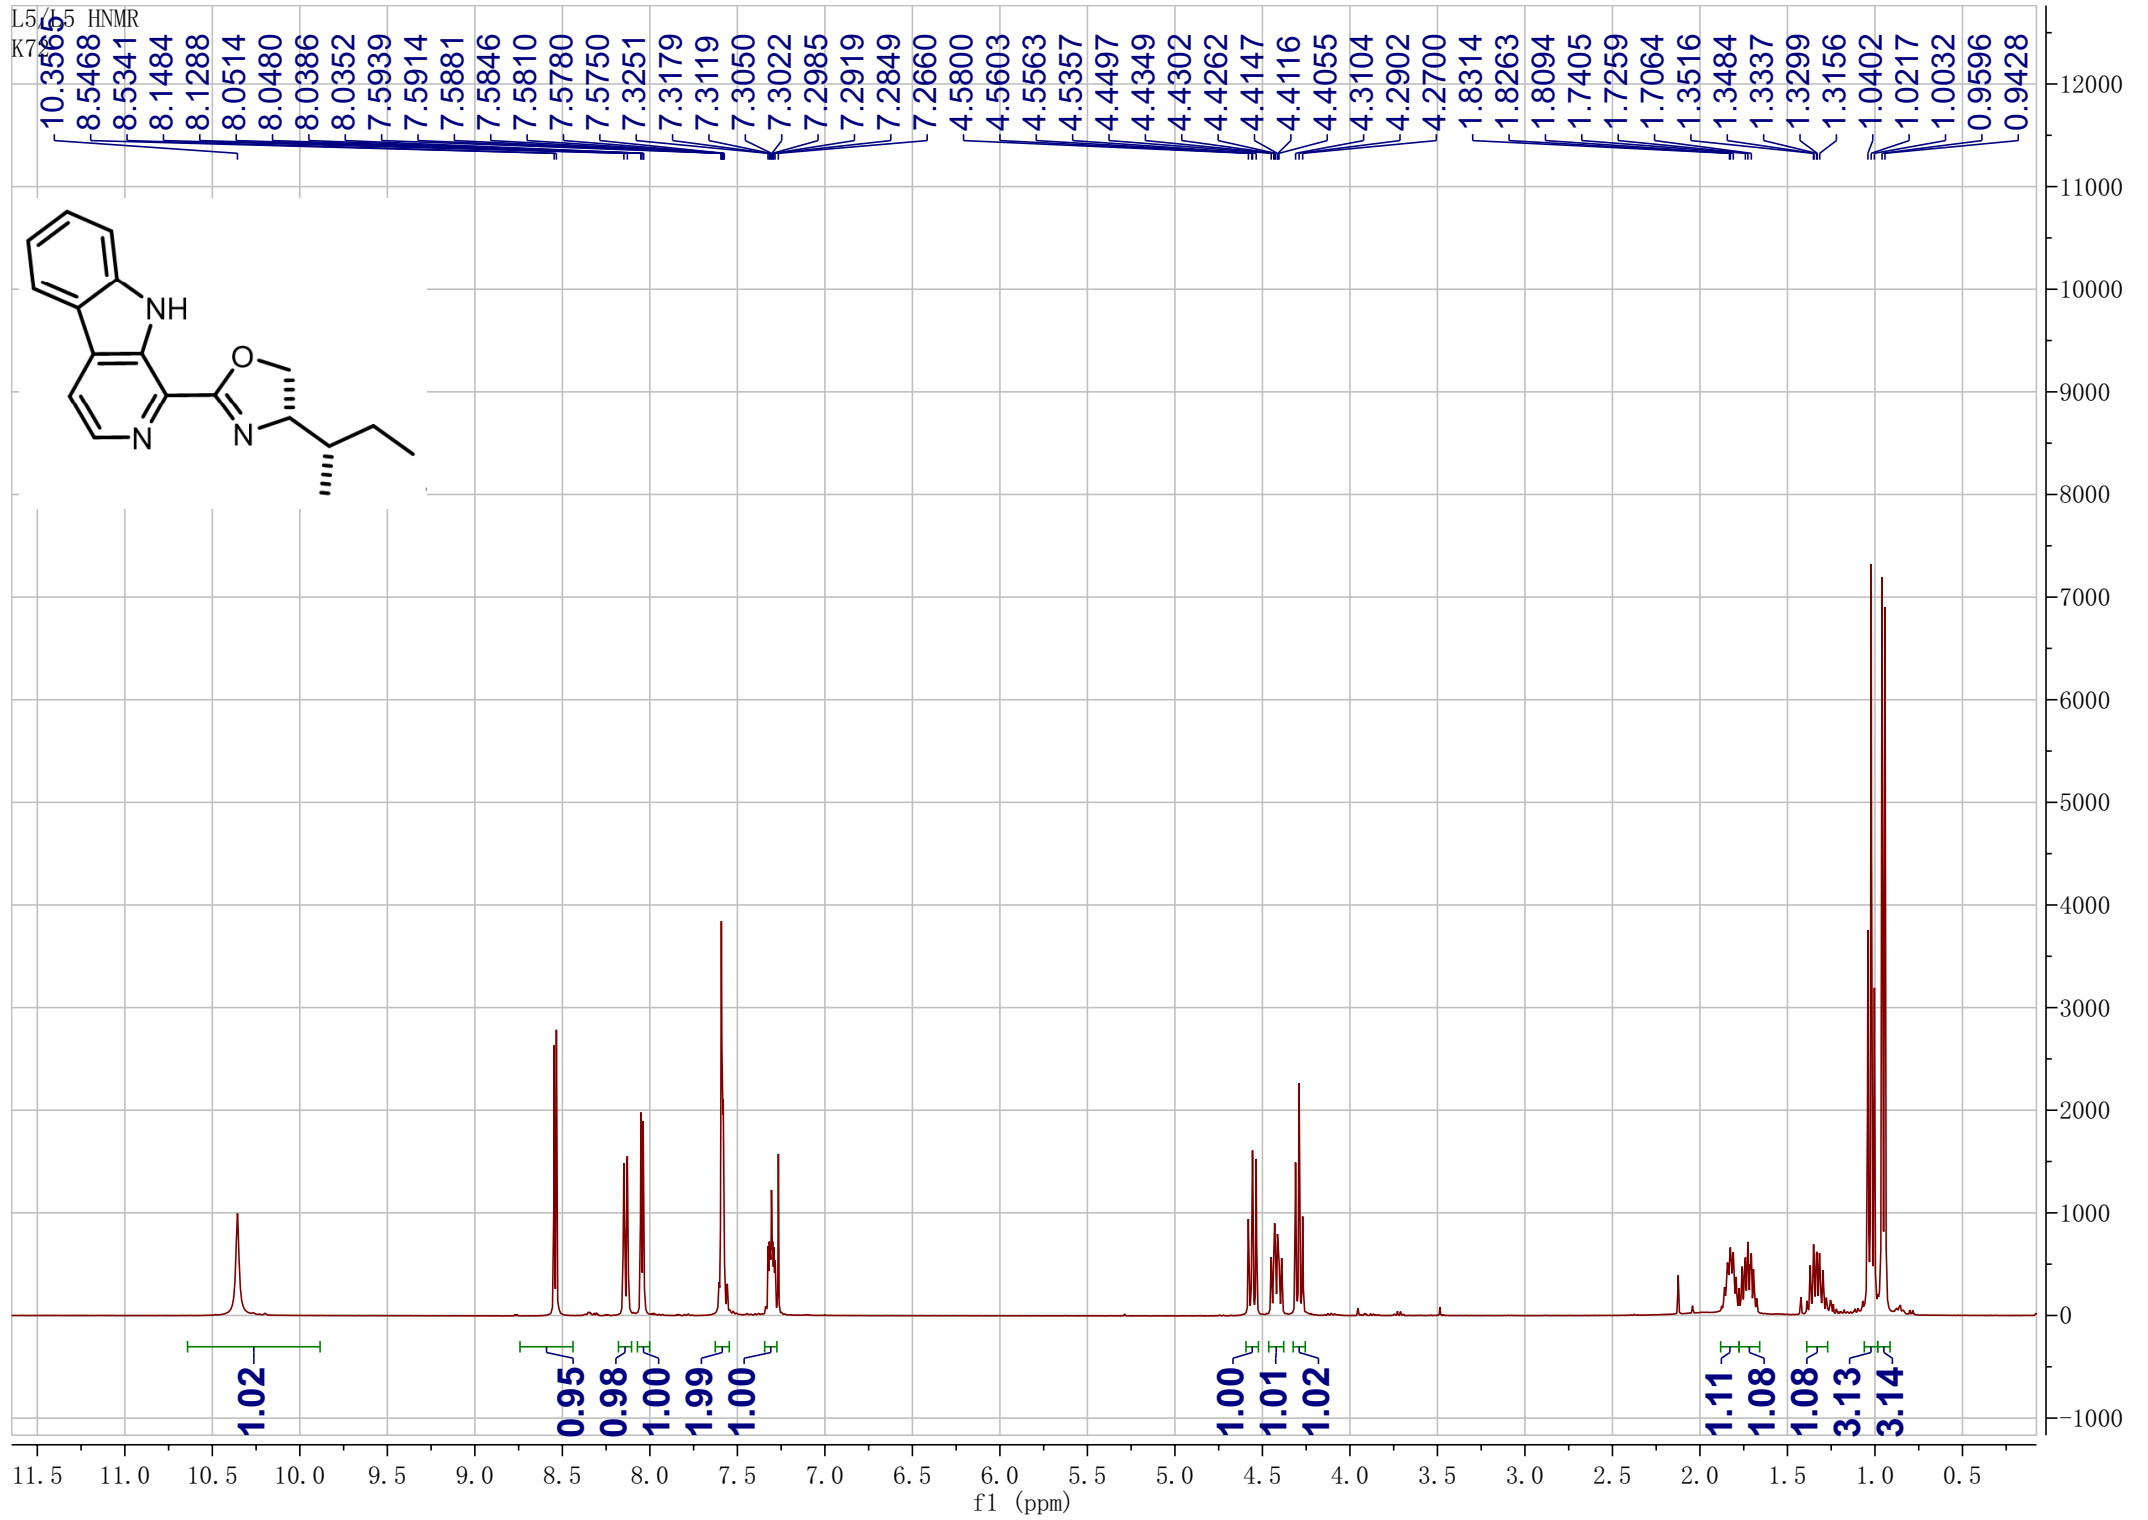



L5/L5CNMR  
K72

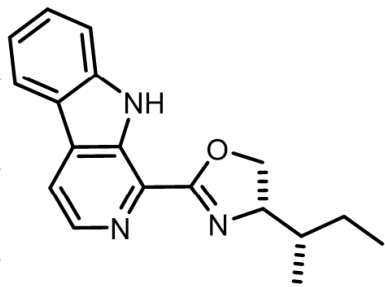

—163.0070

140.5785

138.6786

135.9135

129.9167

129.0440

128.9183

121.9420

121.3437

120.3347

116.9675

111.9766

~71.5033

~69.7236

—39.3594

—26.2938

—14.6165

—11.6667

180

170

160

150

140

130

120

110

100

90

80

70

60

50

40

30

20

10

f1 (ppm)

1400

1300

1200

1100

1000

900

800

700

600

500

400

300

200

100

0

-100

191106-29 228 (1.740)

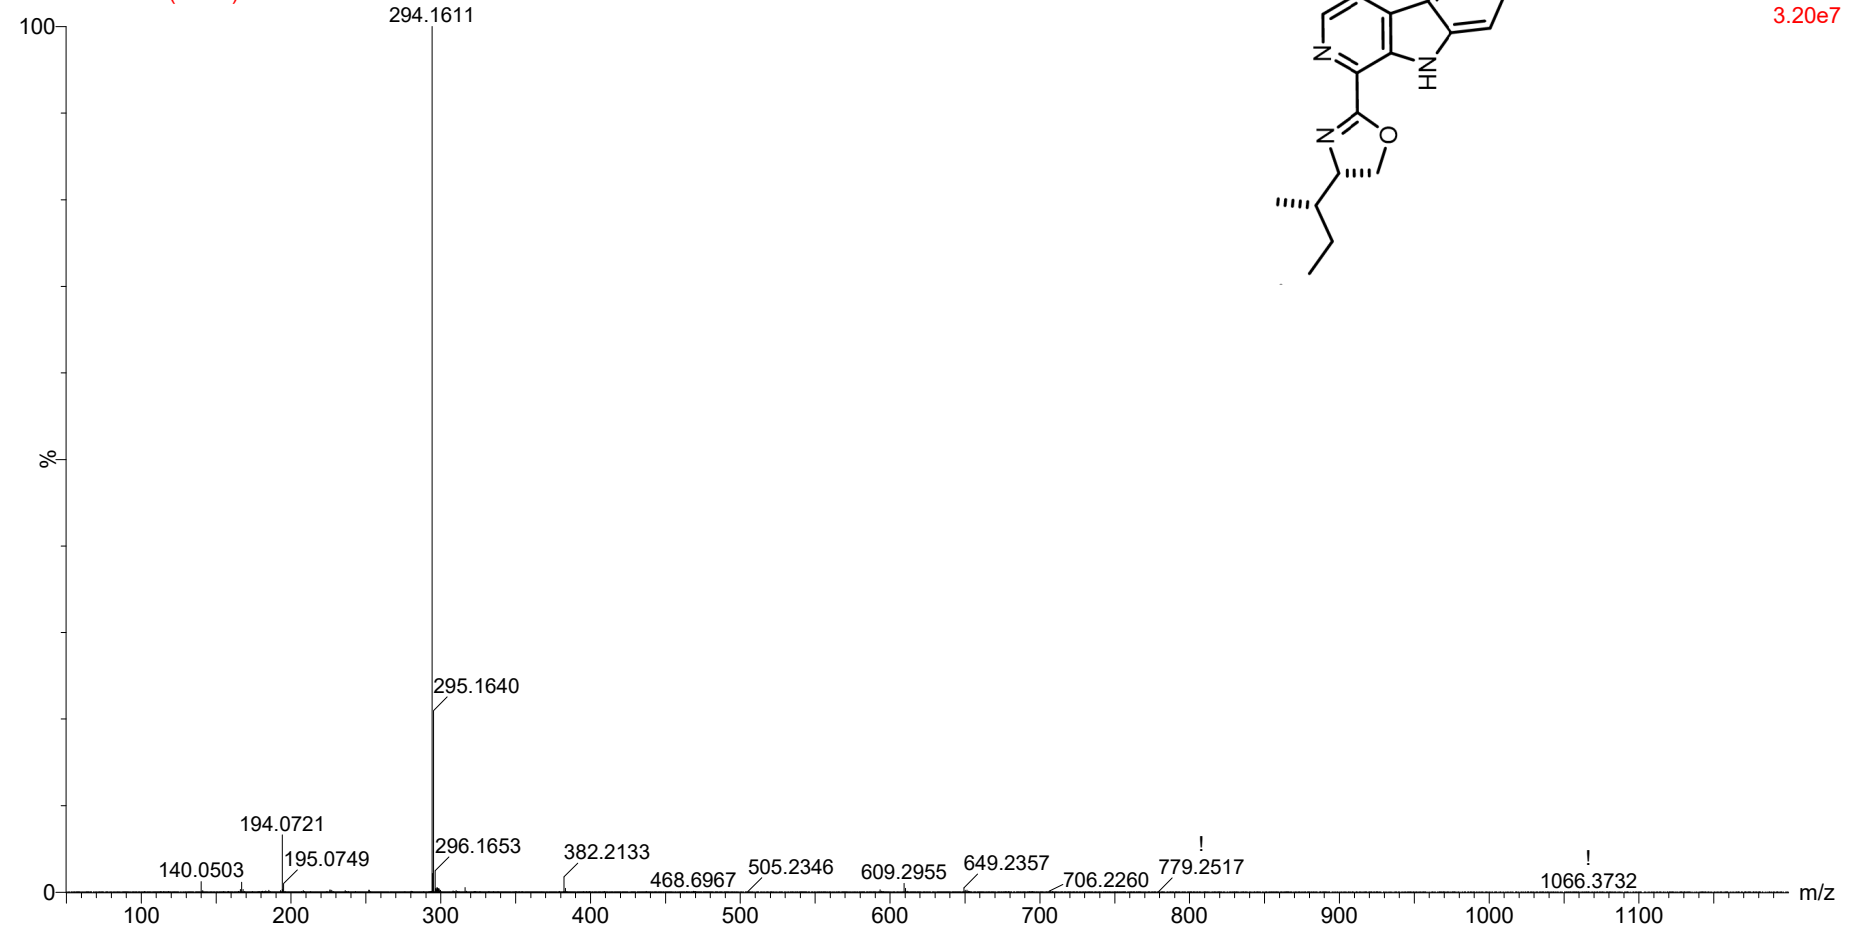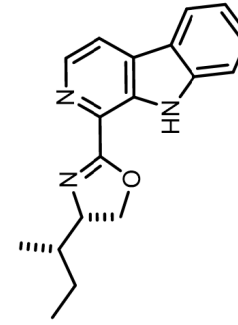

1: TOF MS ES+  
3.20e7

L3/L3-HNMR  
K13

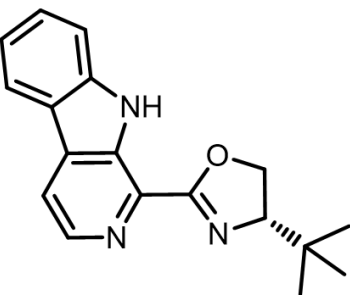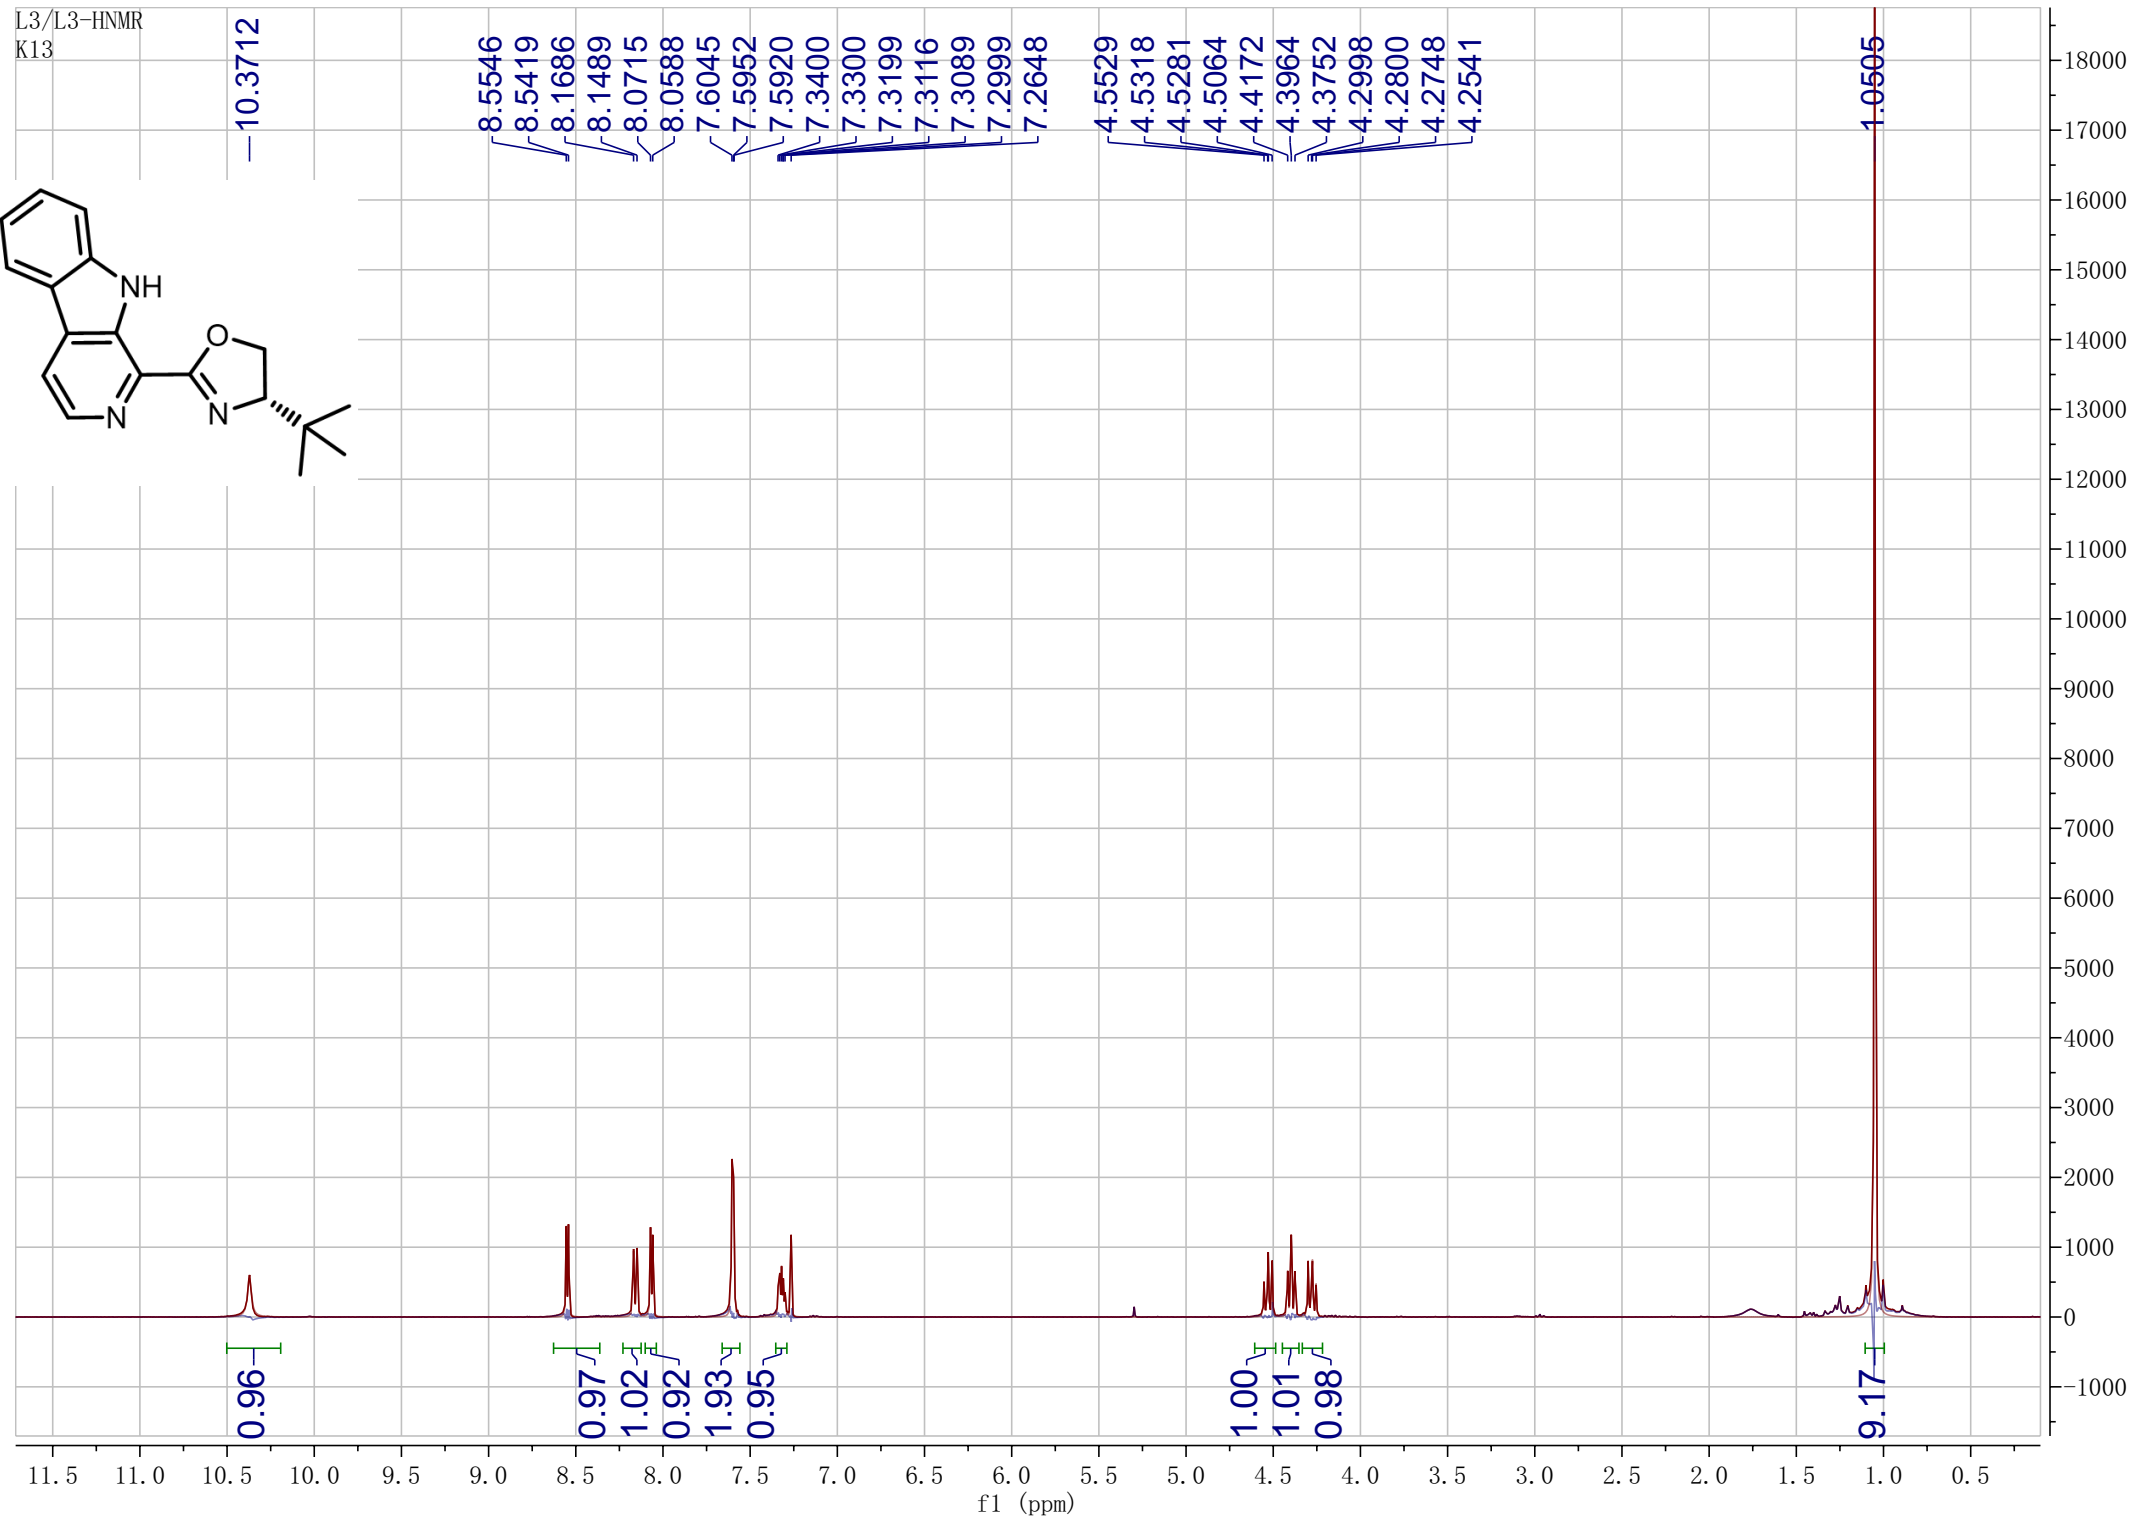

L3/L3-CNMR  
K36

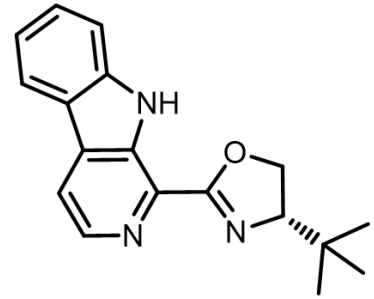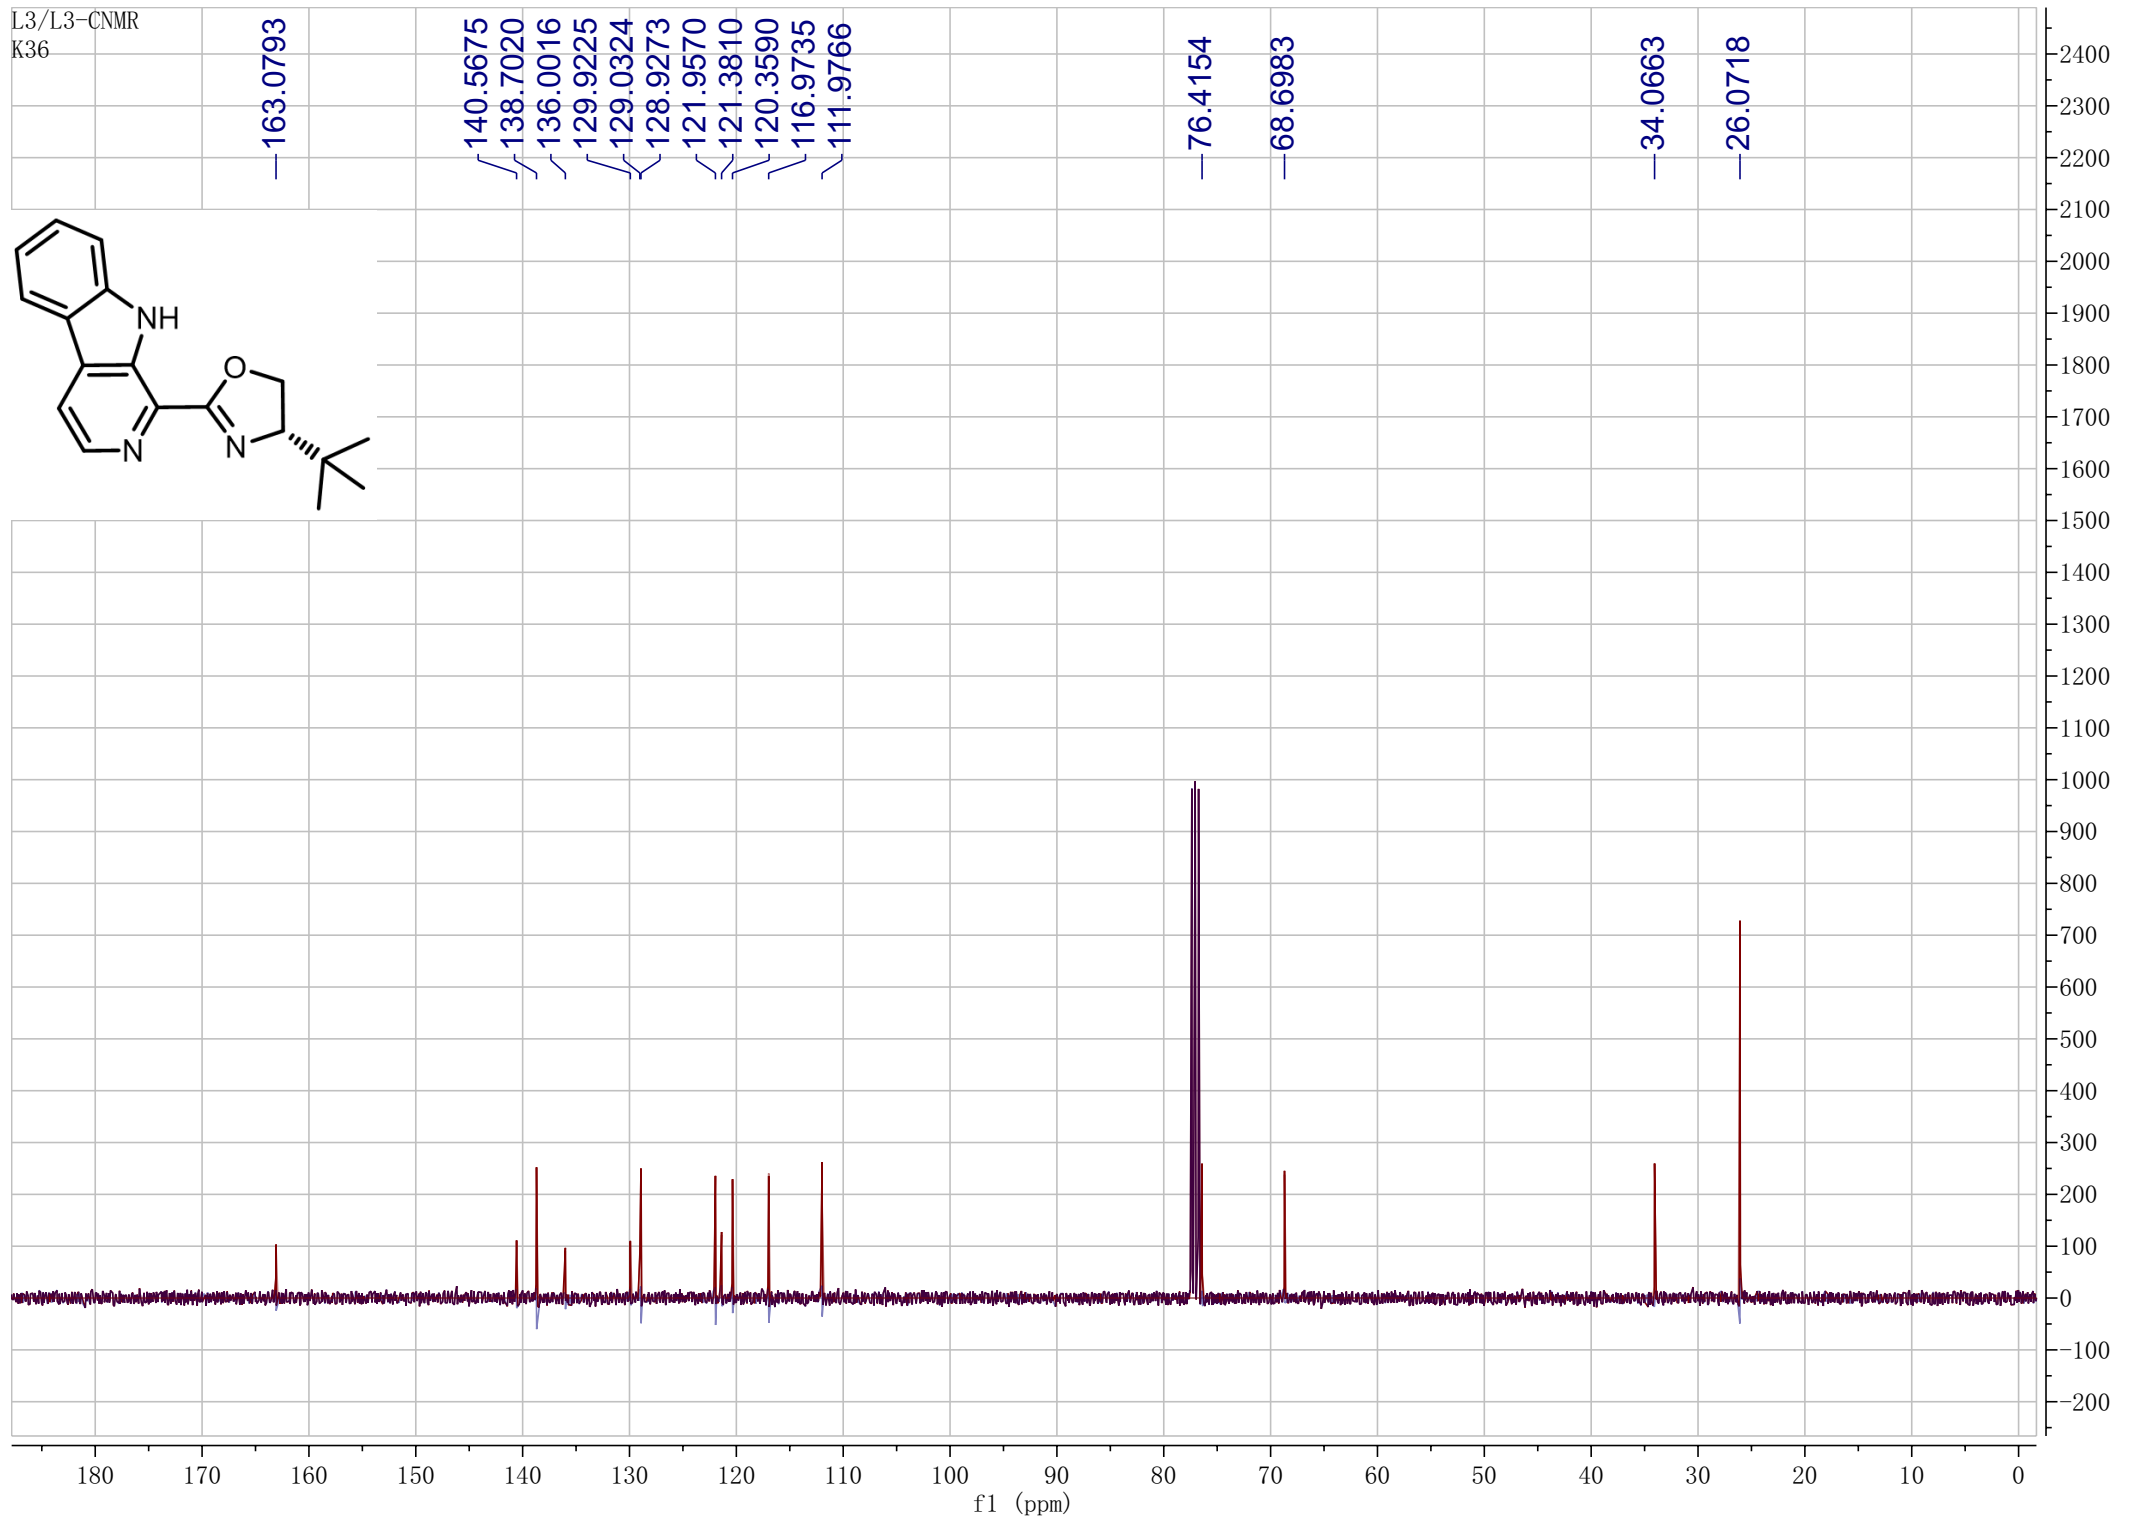

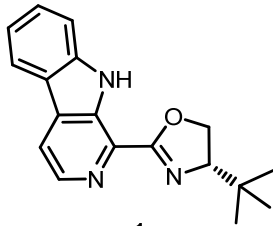

(S)-tBu-β<sup>1</sup>CarOx

20190506-21 251 (1.912) Cm (246:258)

1: TOF MS ES+  
5.02e7

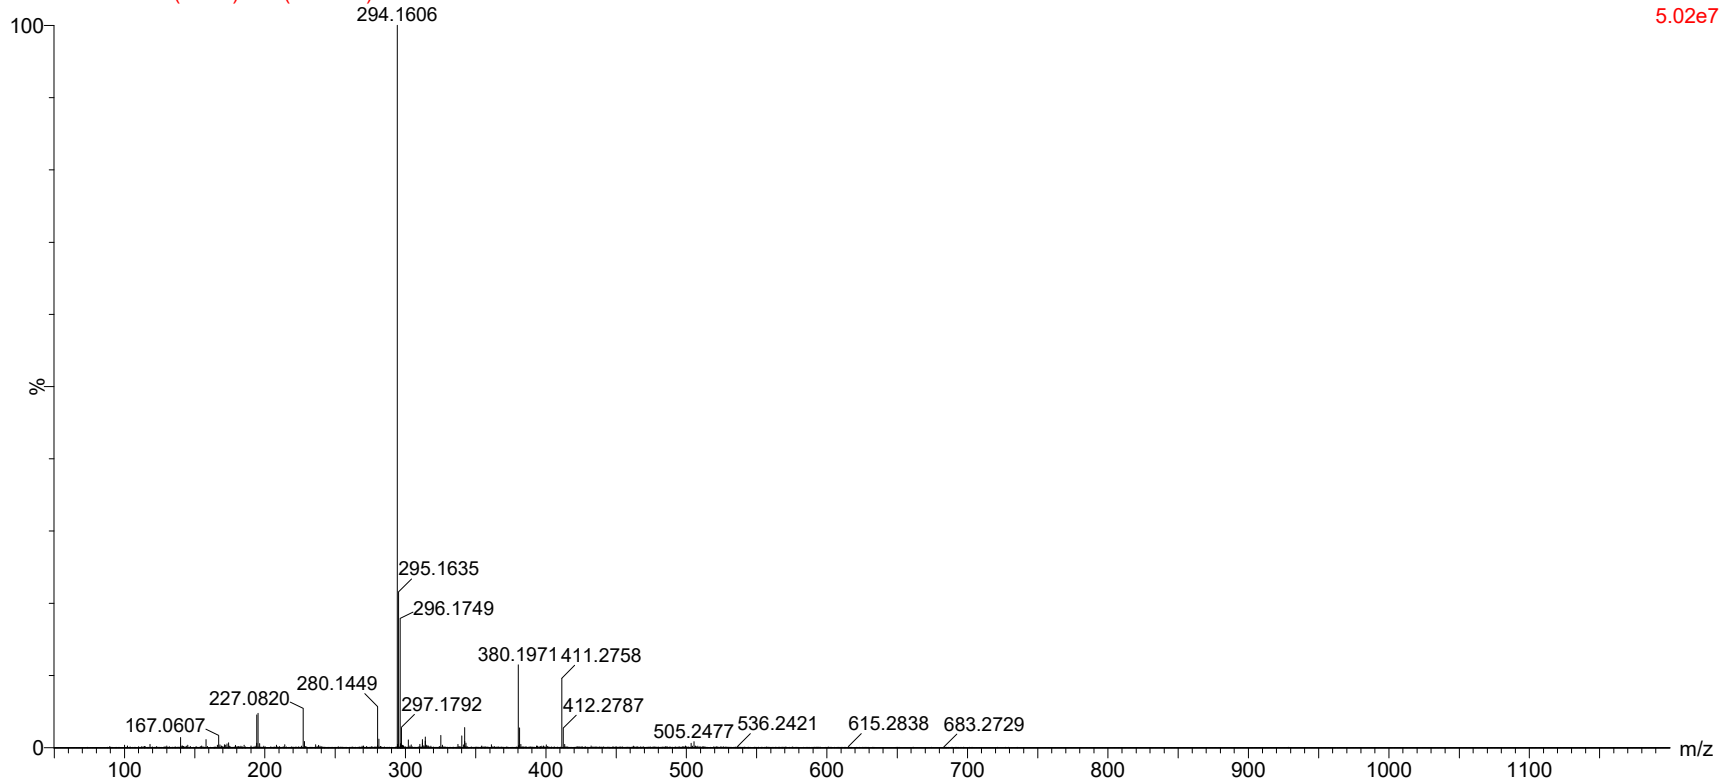

L4/L4-HNMR  
K14

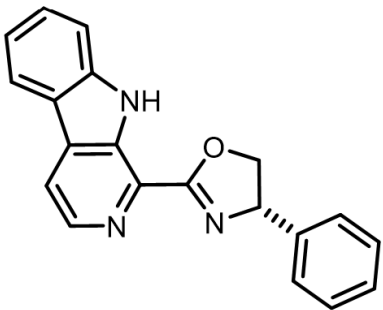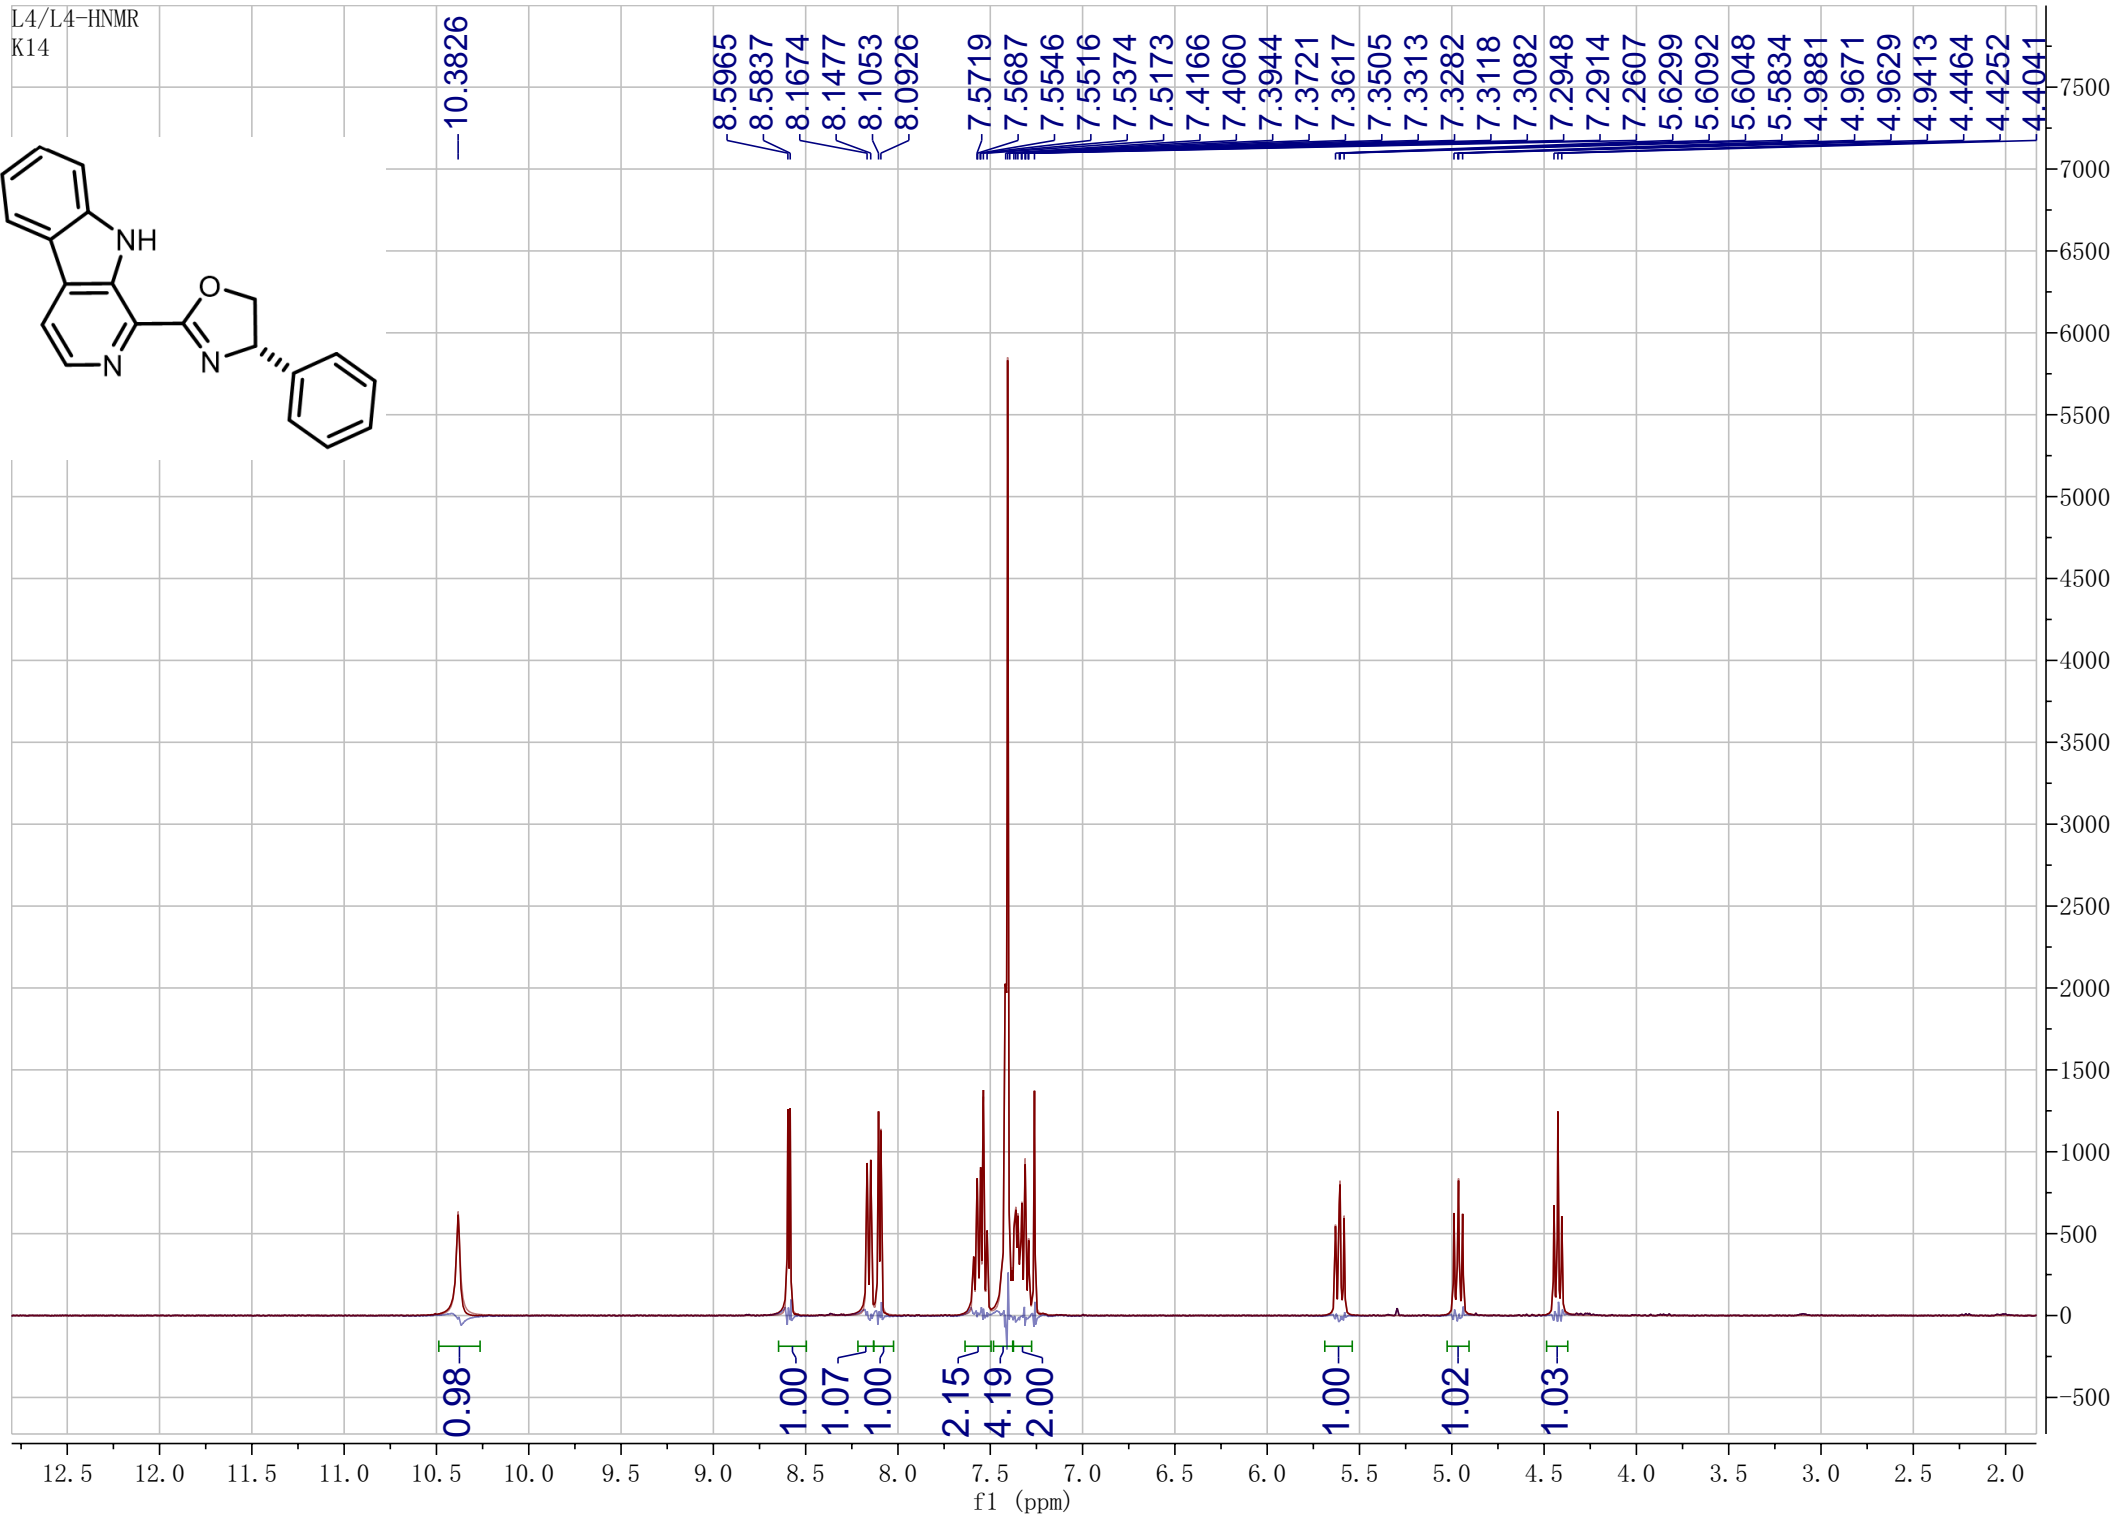

L4/CNMR4  
k37

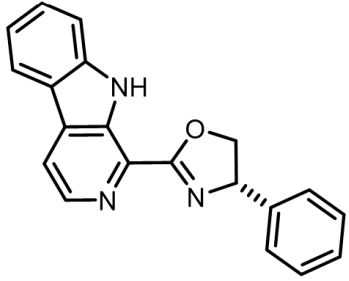

—164.5194

142.1747  
140.6450  
138.7635  
136.1156  
130.1164  
129.0132  
128.9539  
128.6423  
127.9762  
126.9113  
121.9080  
121.2789  
120.3967  
117.2657  
112.0251

—74.8059  
—70.4367

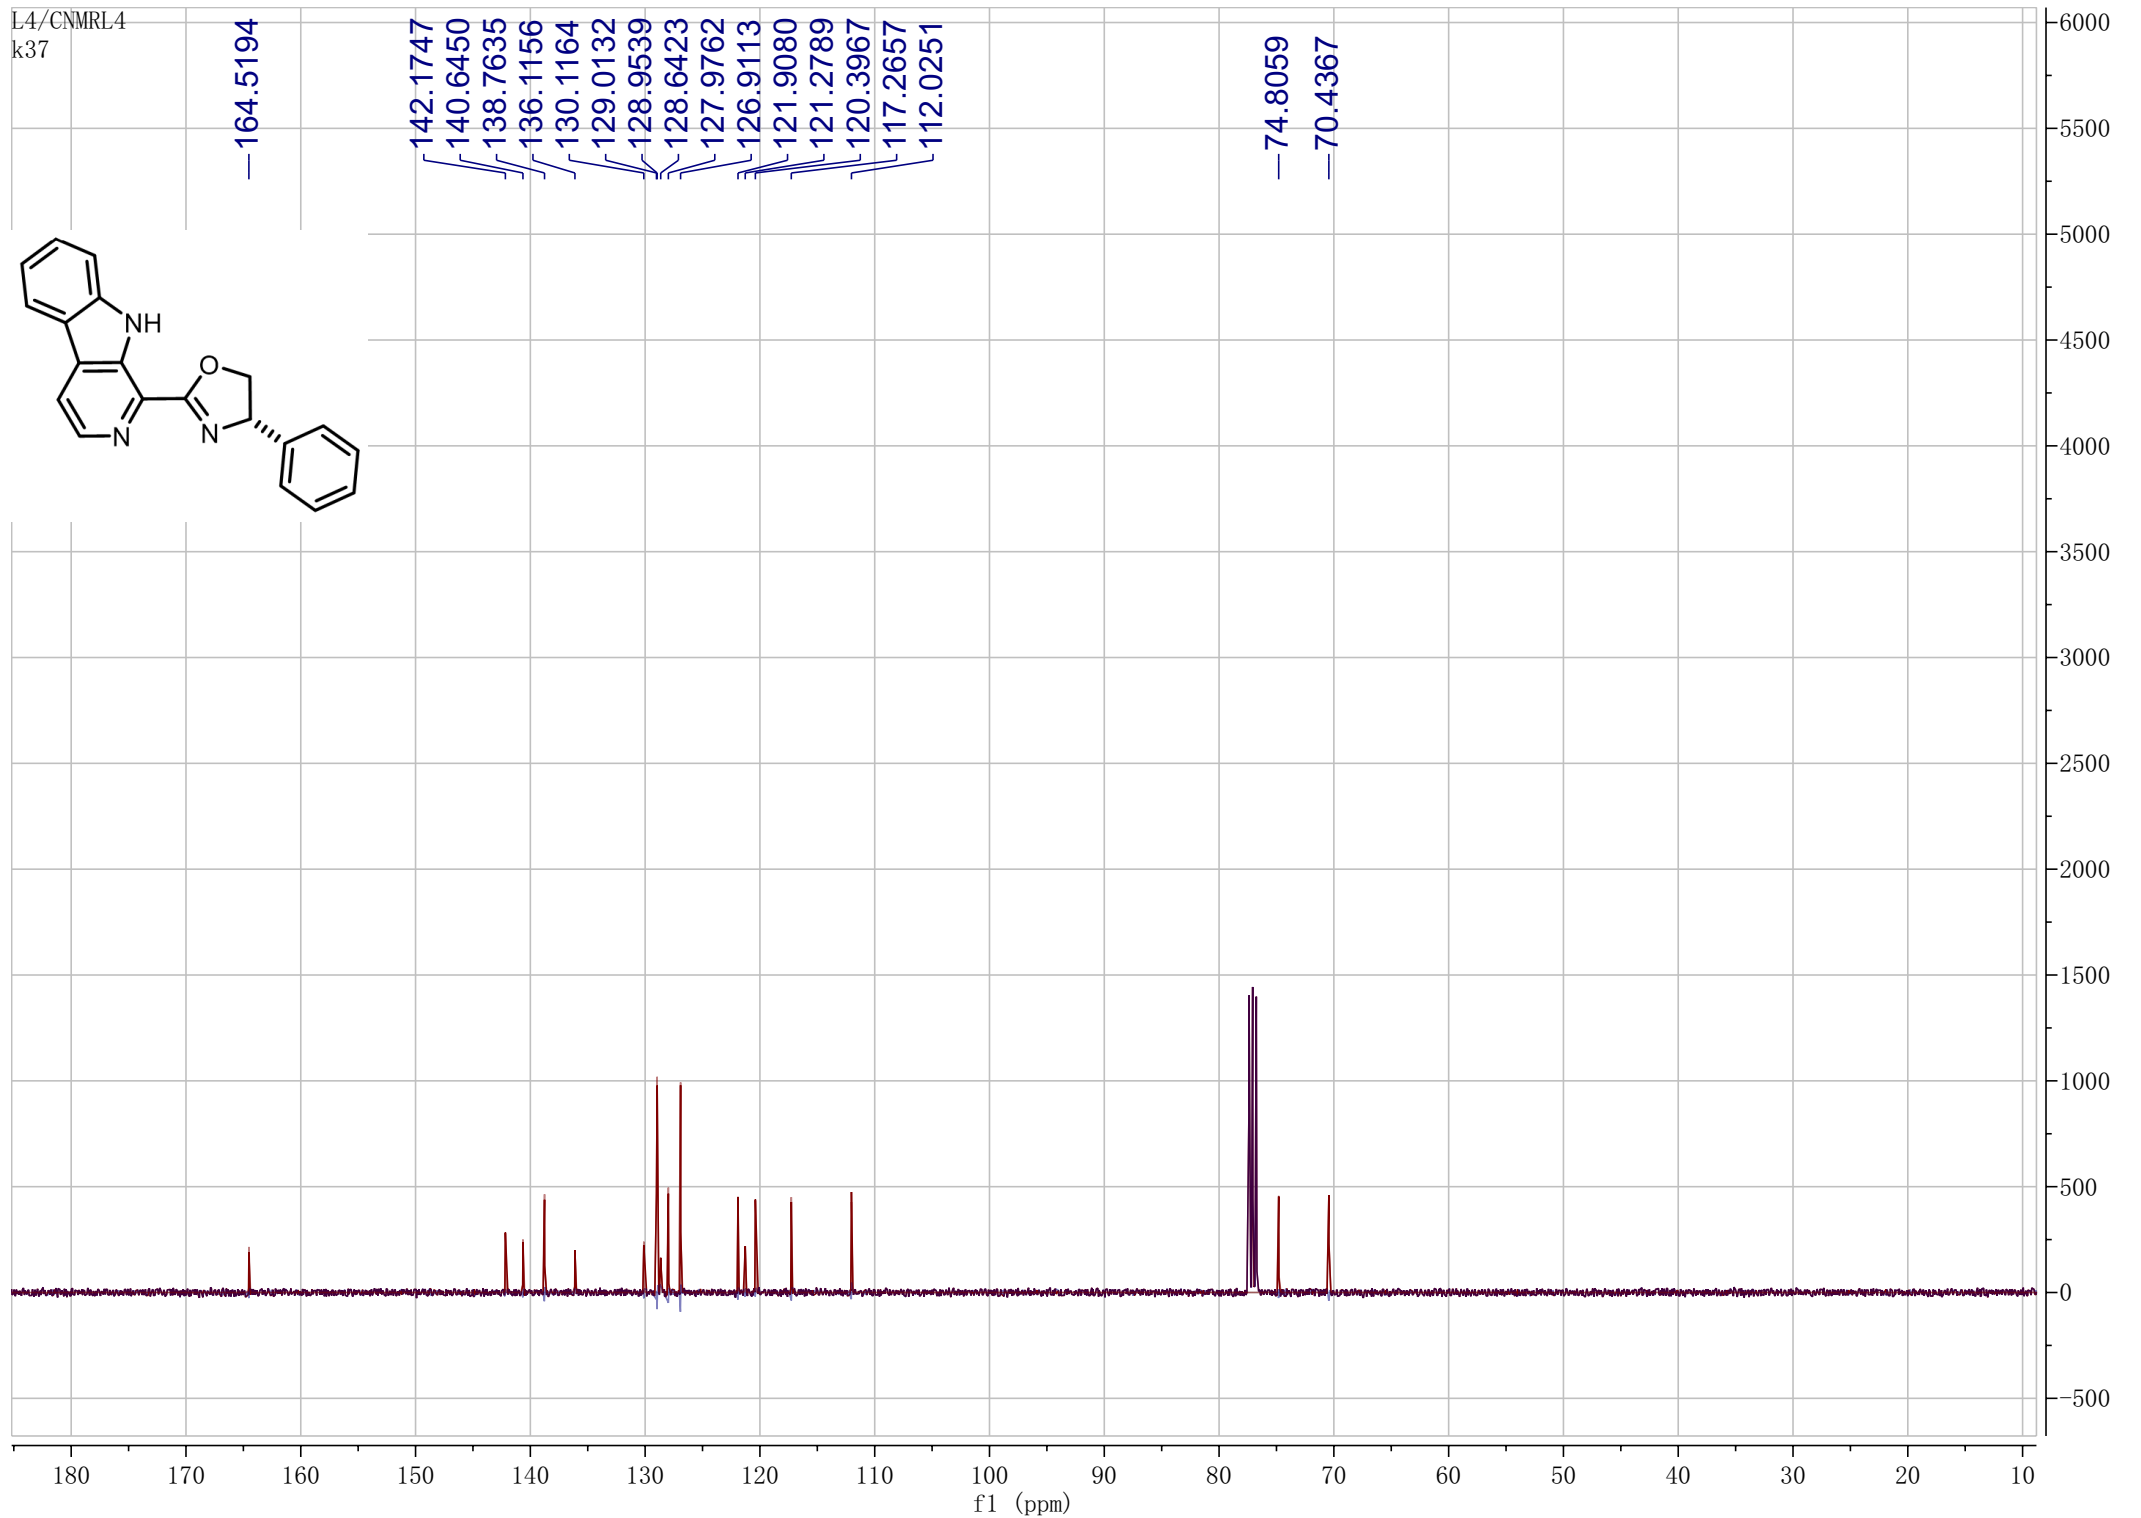





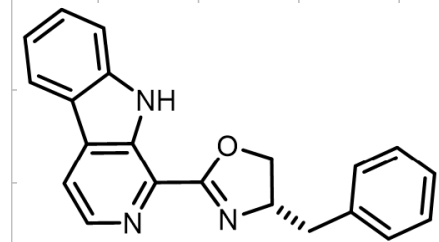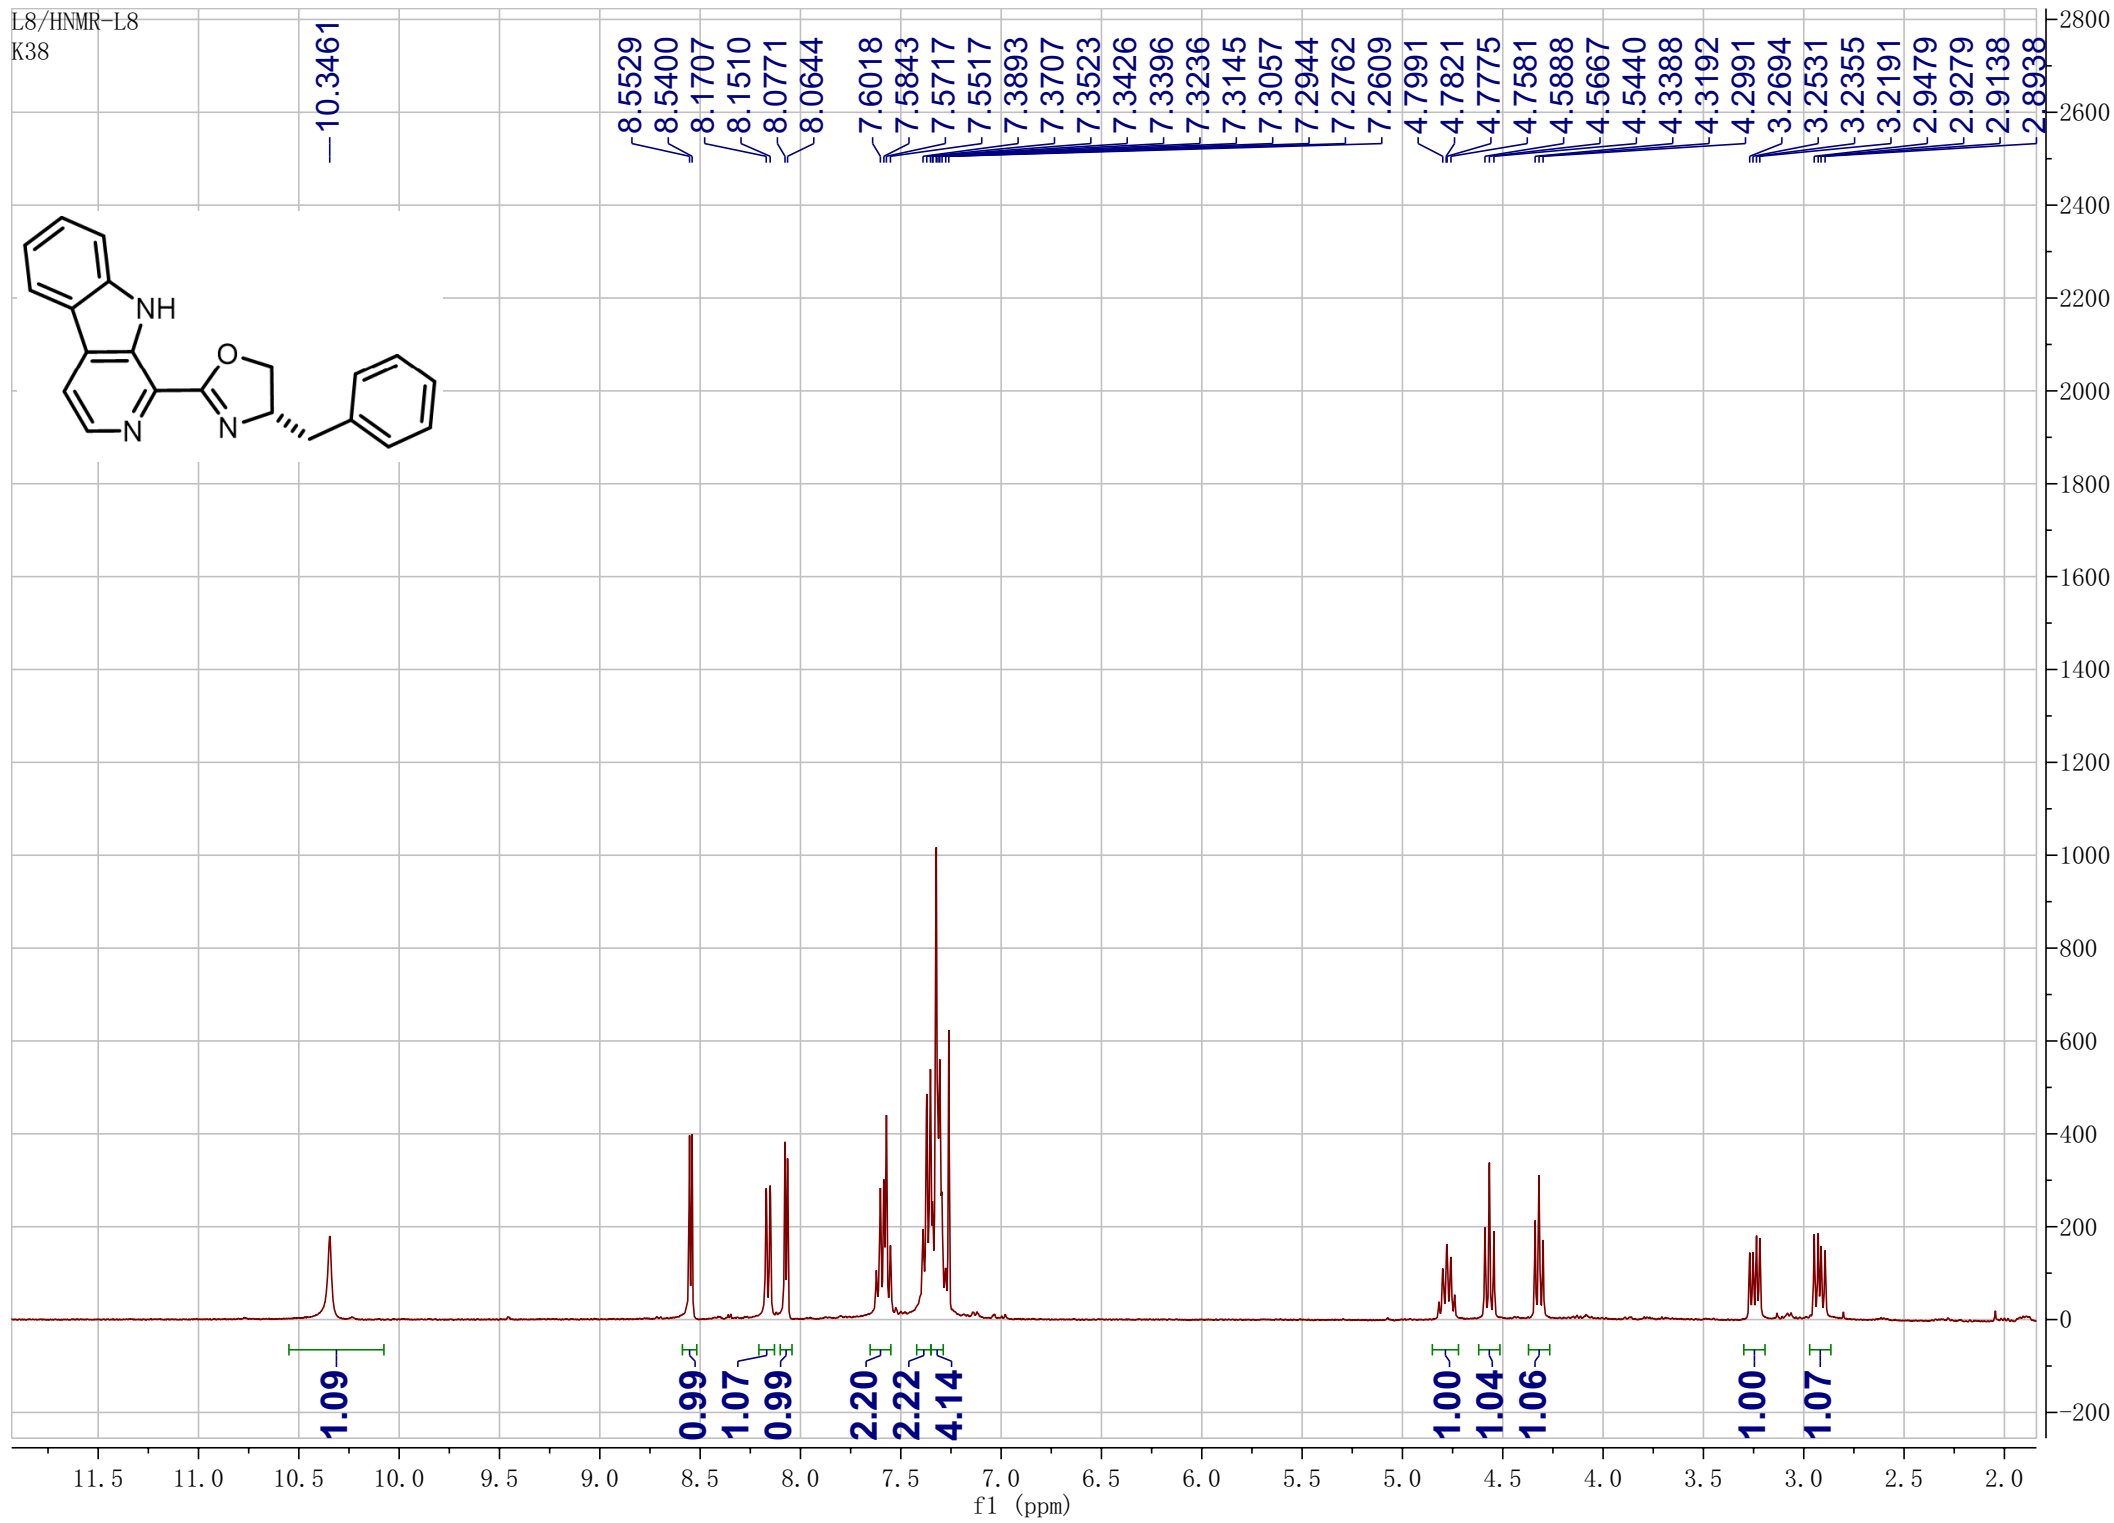

K87. 10. fid

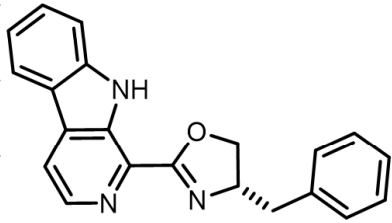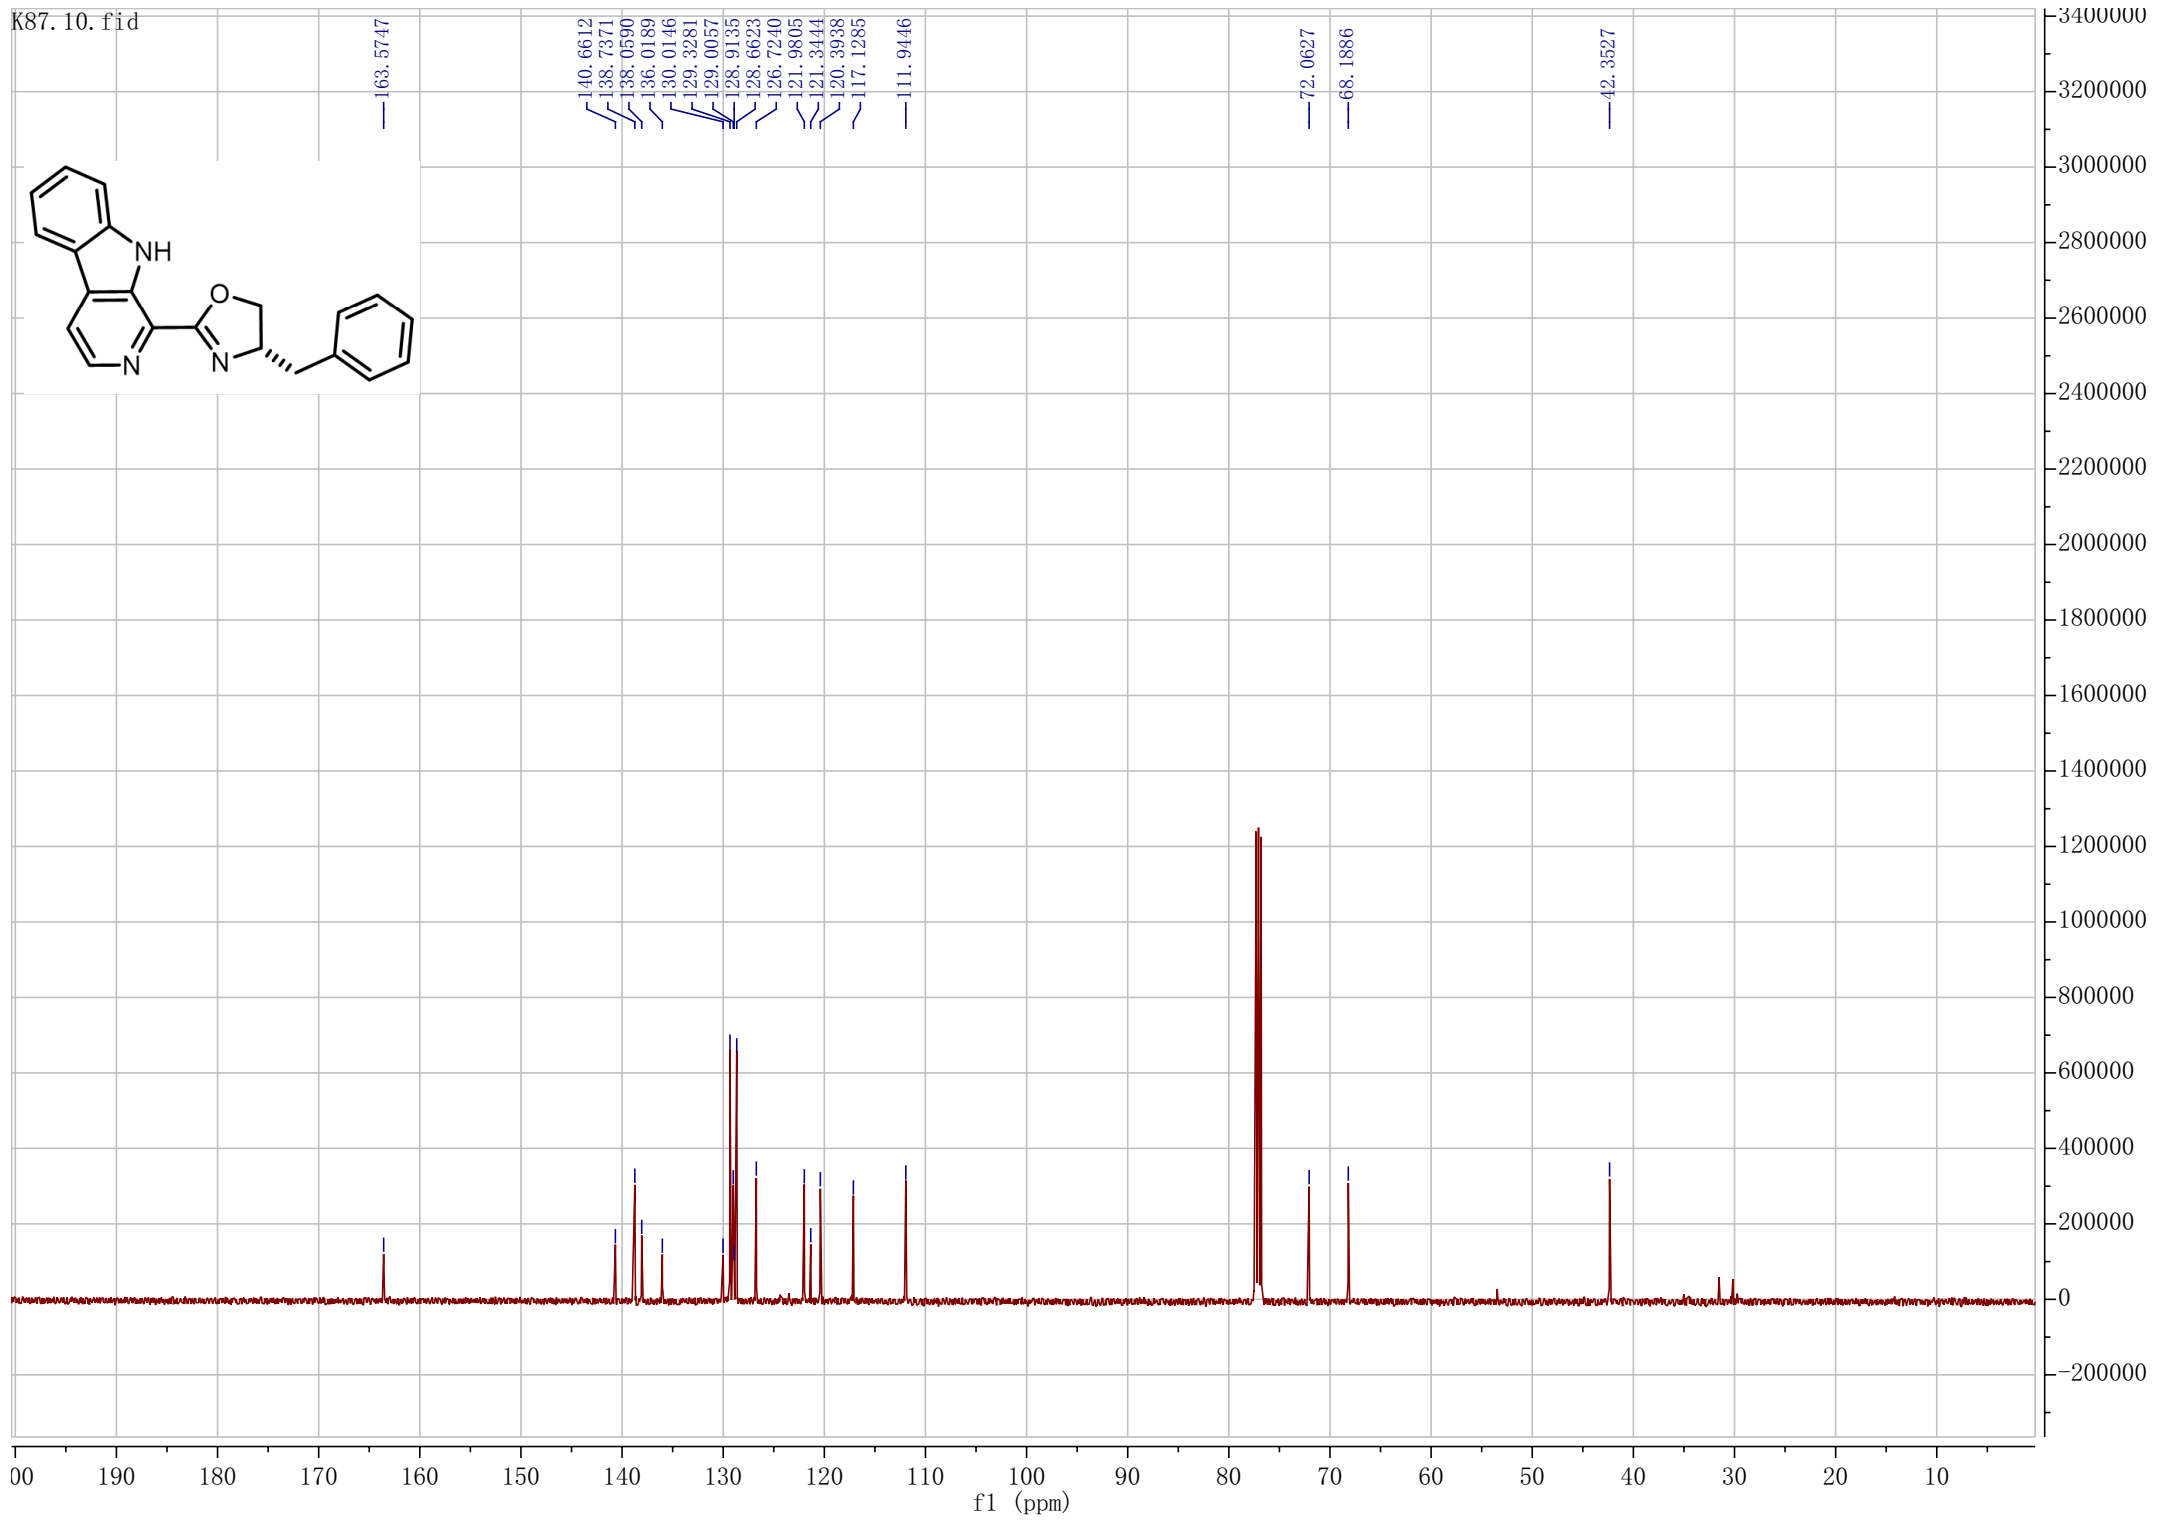

20190506-23 240 (1.816) Cm (236:249)

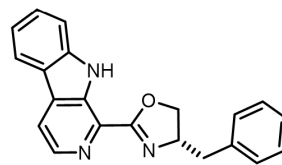

1: TOF MS ES+  
8.68e7

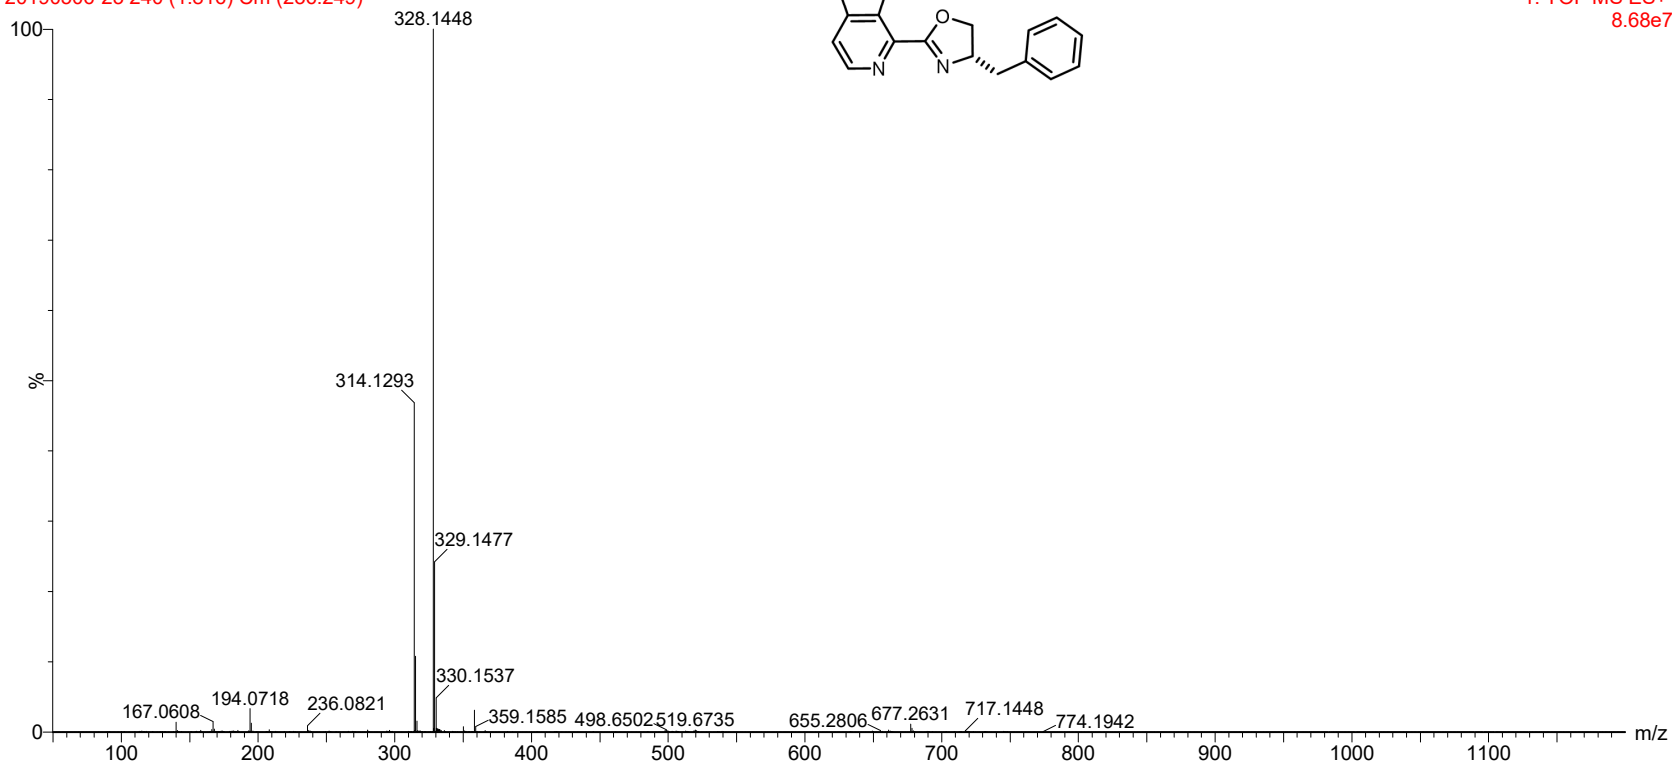

L9/49  
K78

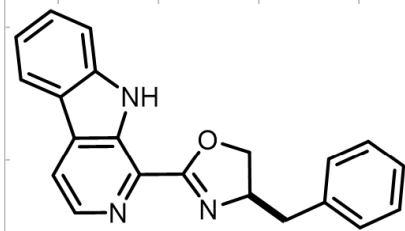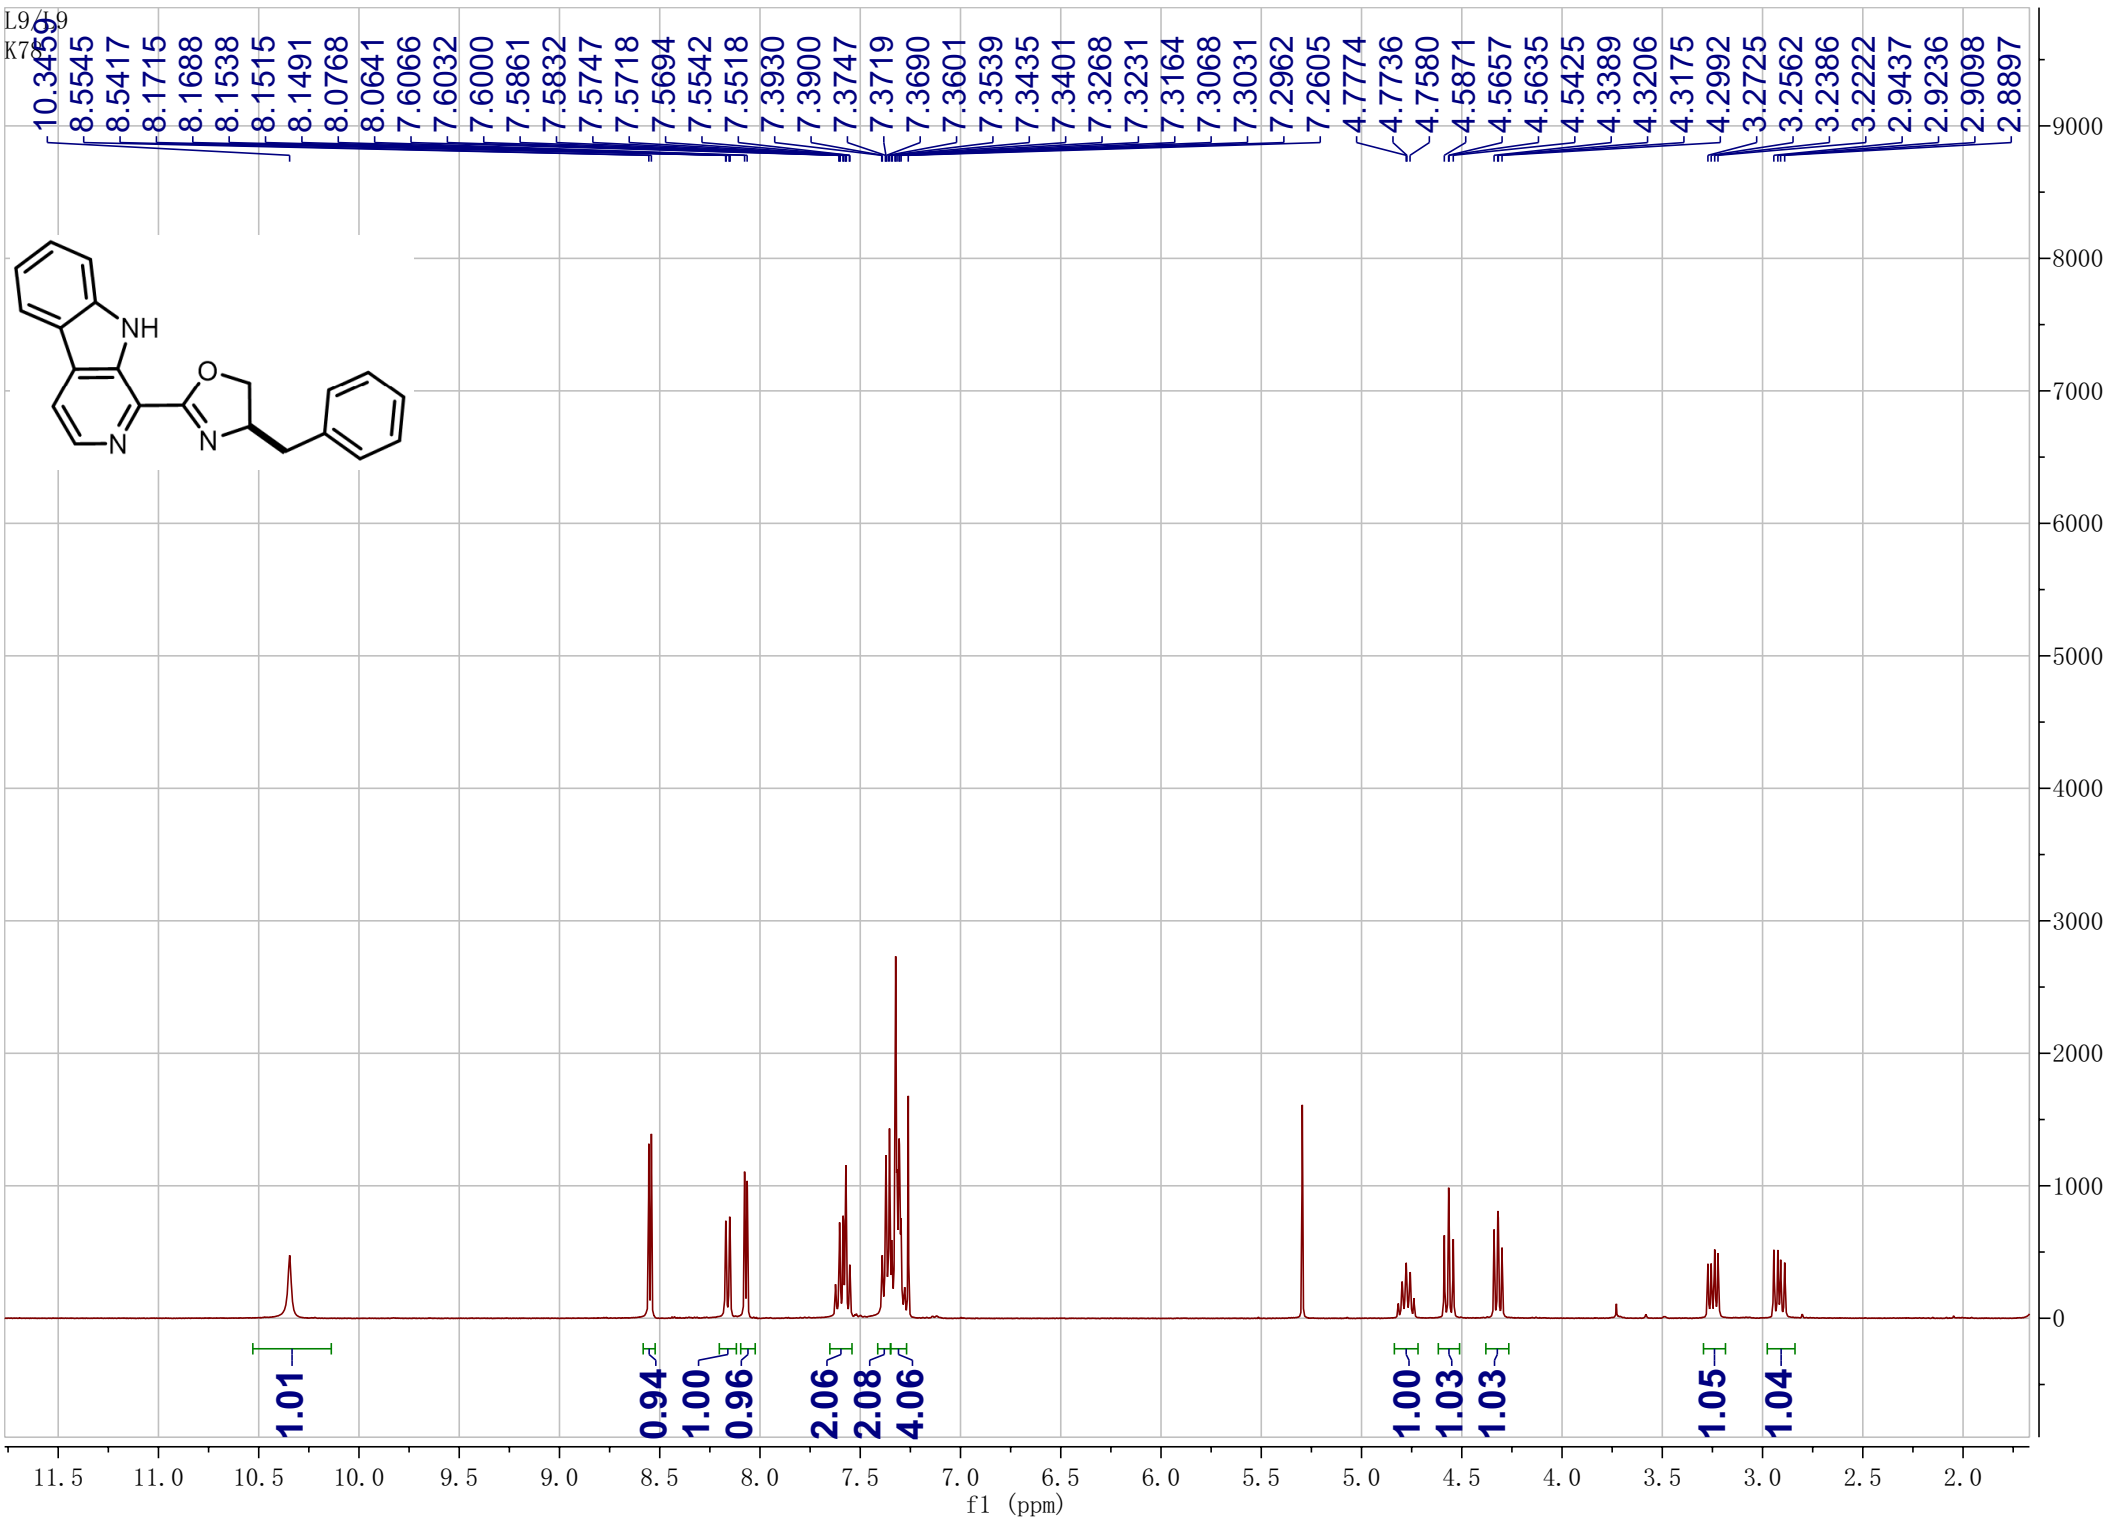

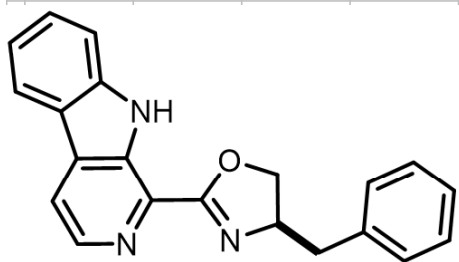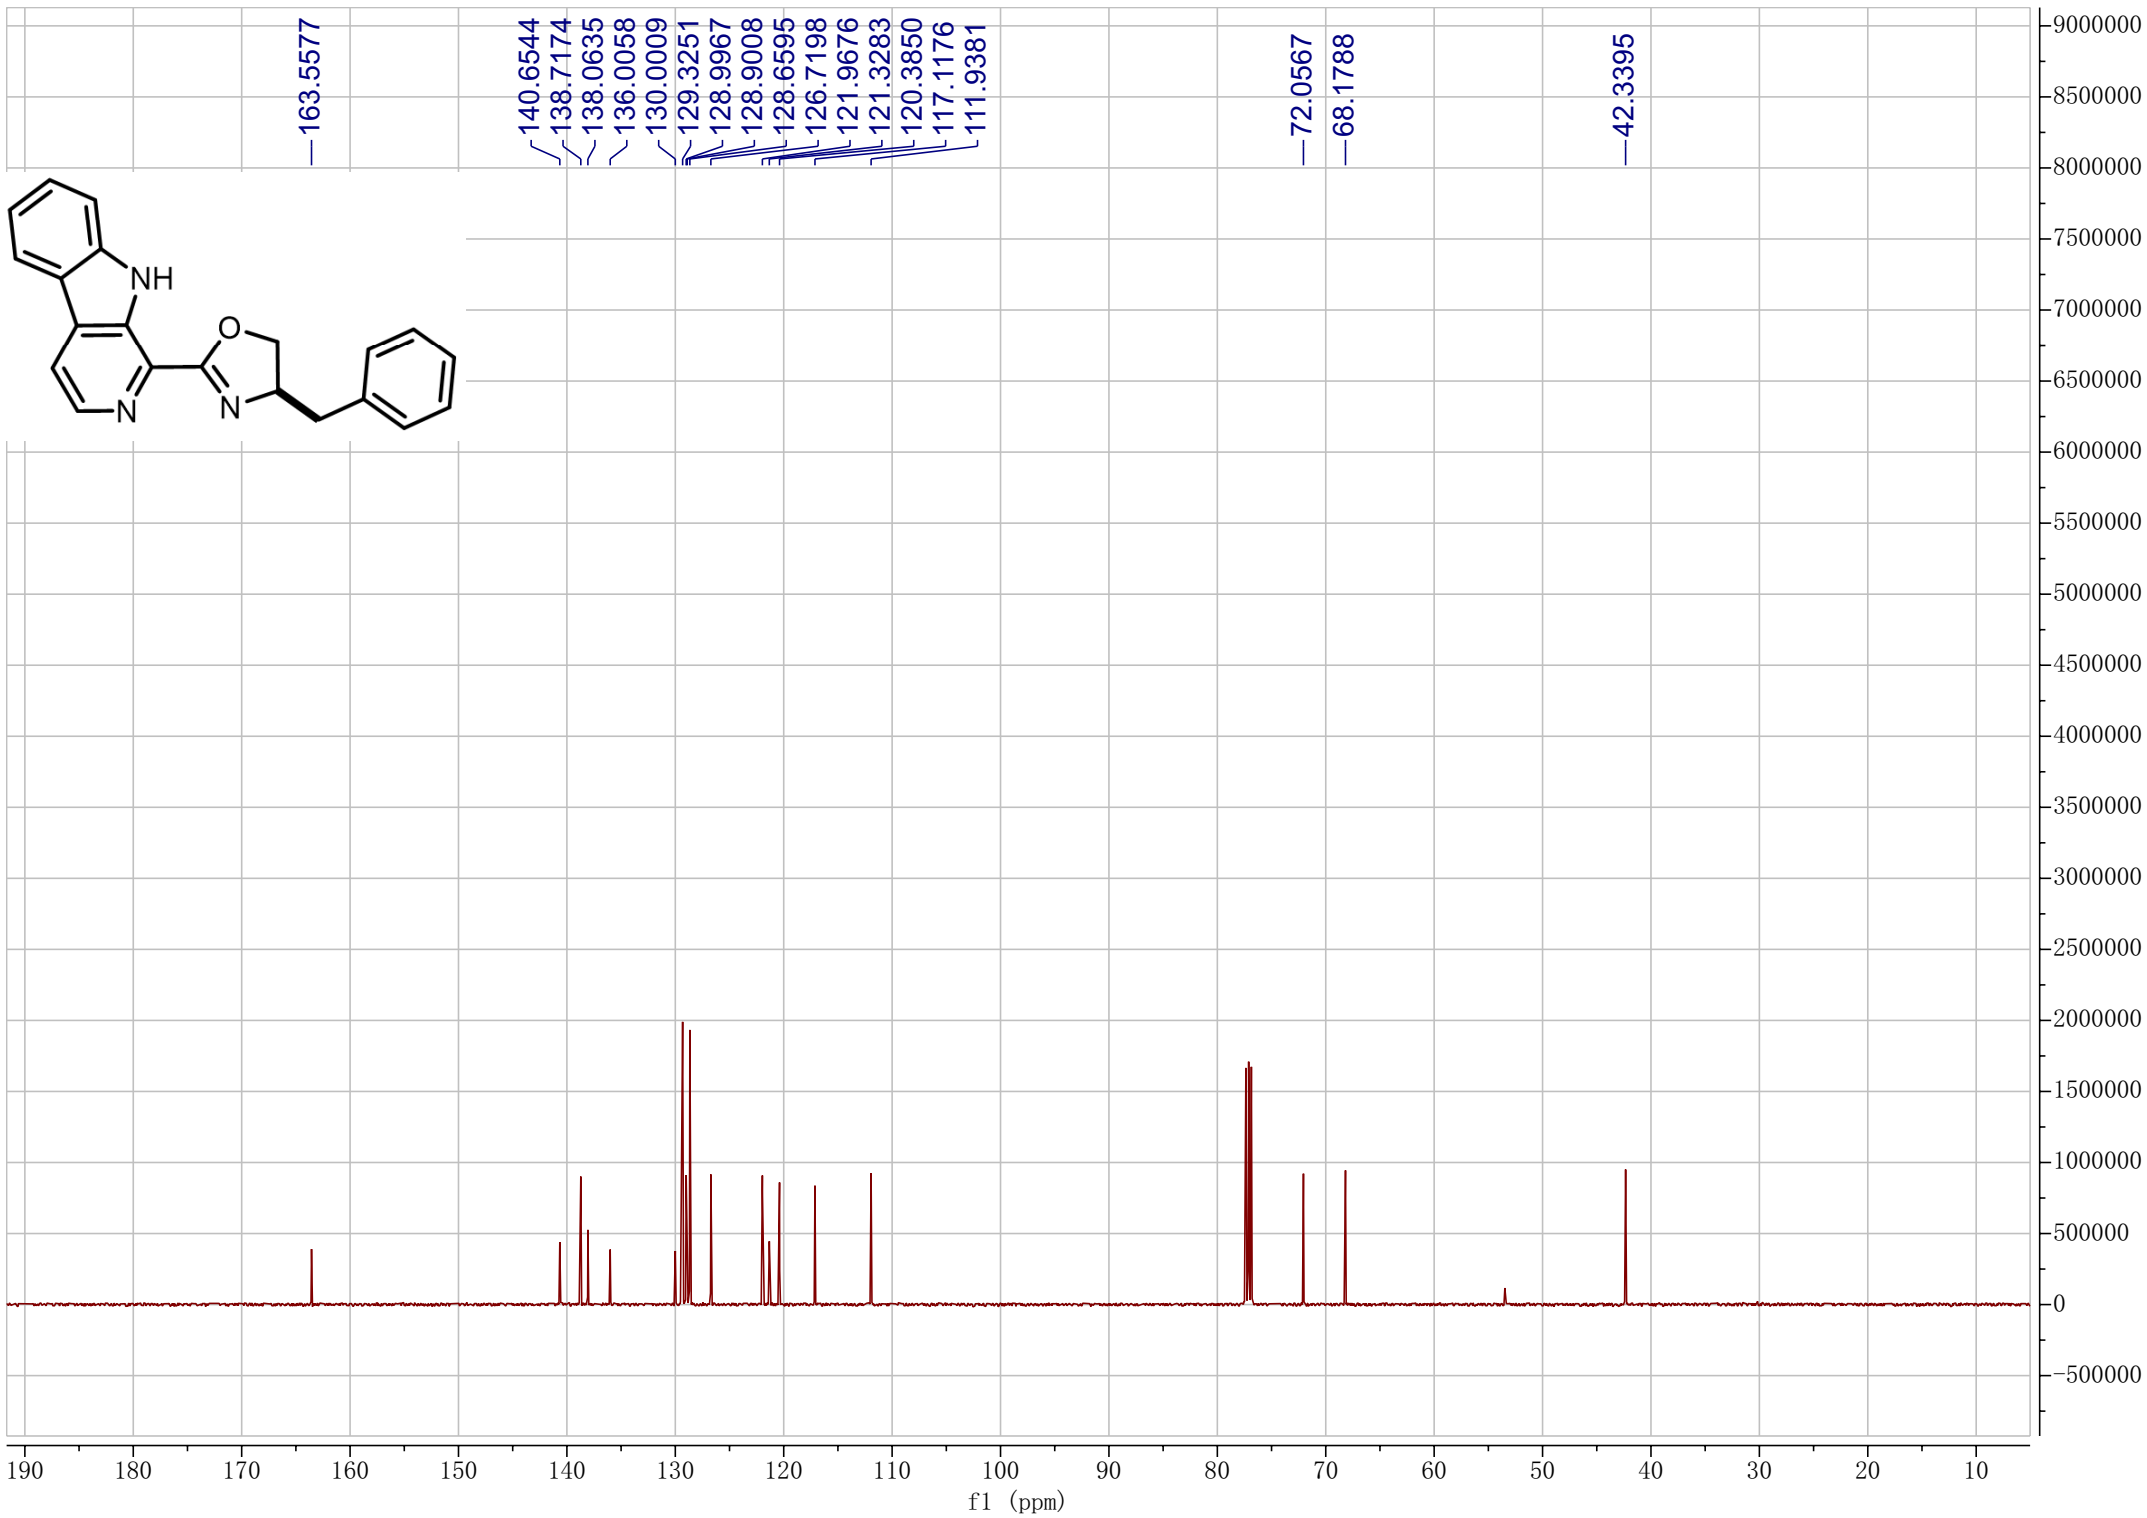

20190506-23 240 (1.816) Cm (236:249)

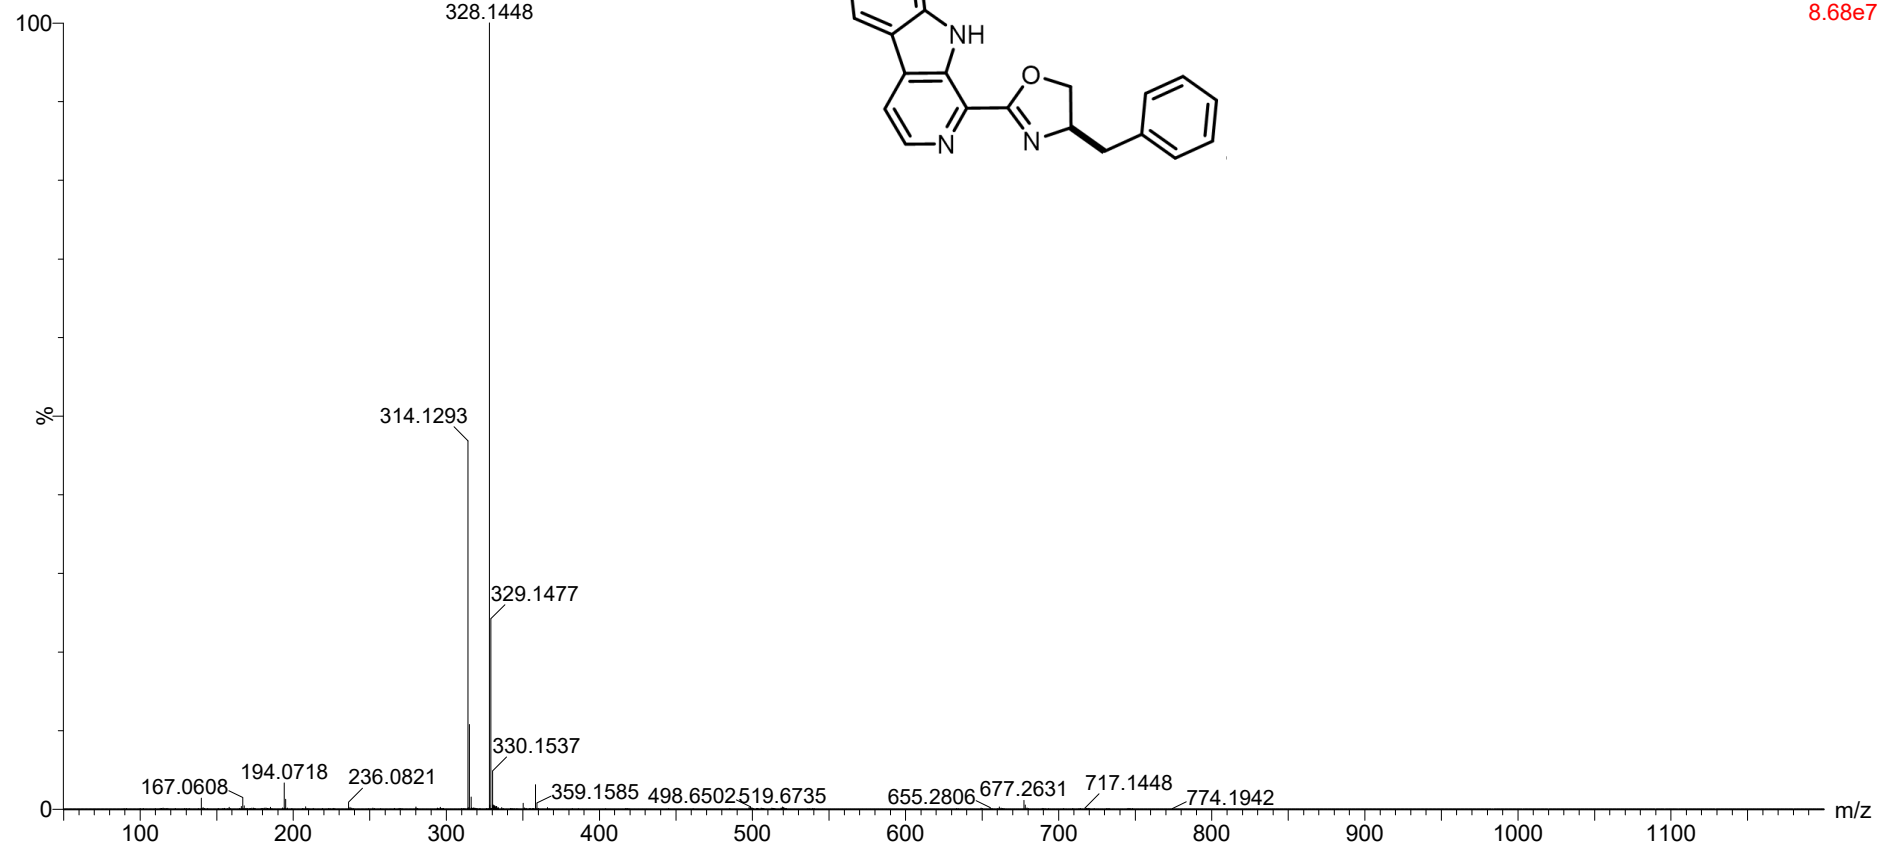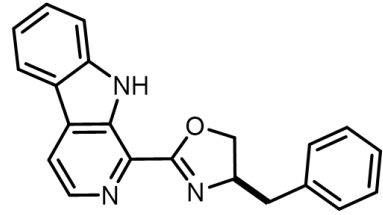

1: TOF MS ES+  
8.68e7

L8/L8-HNMR  
K19

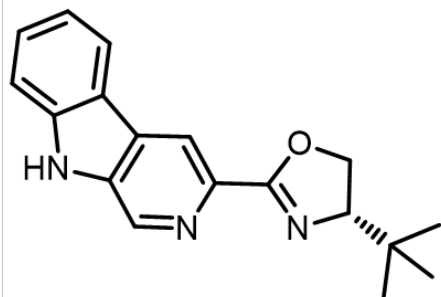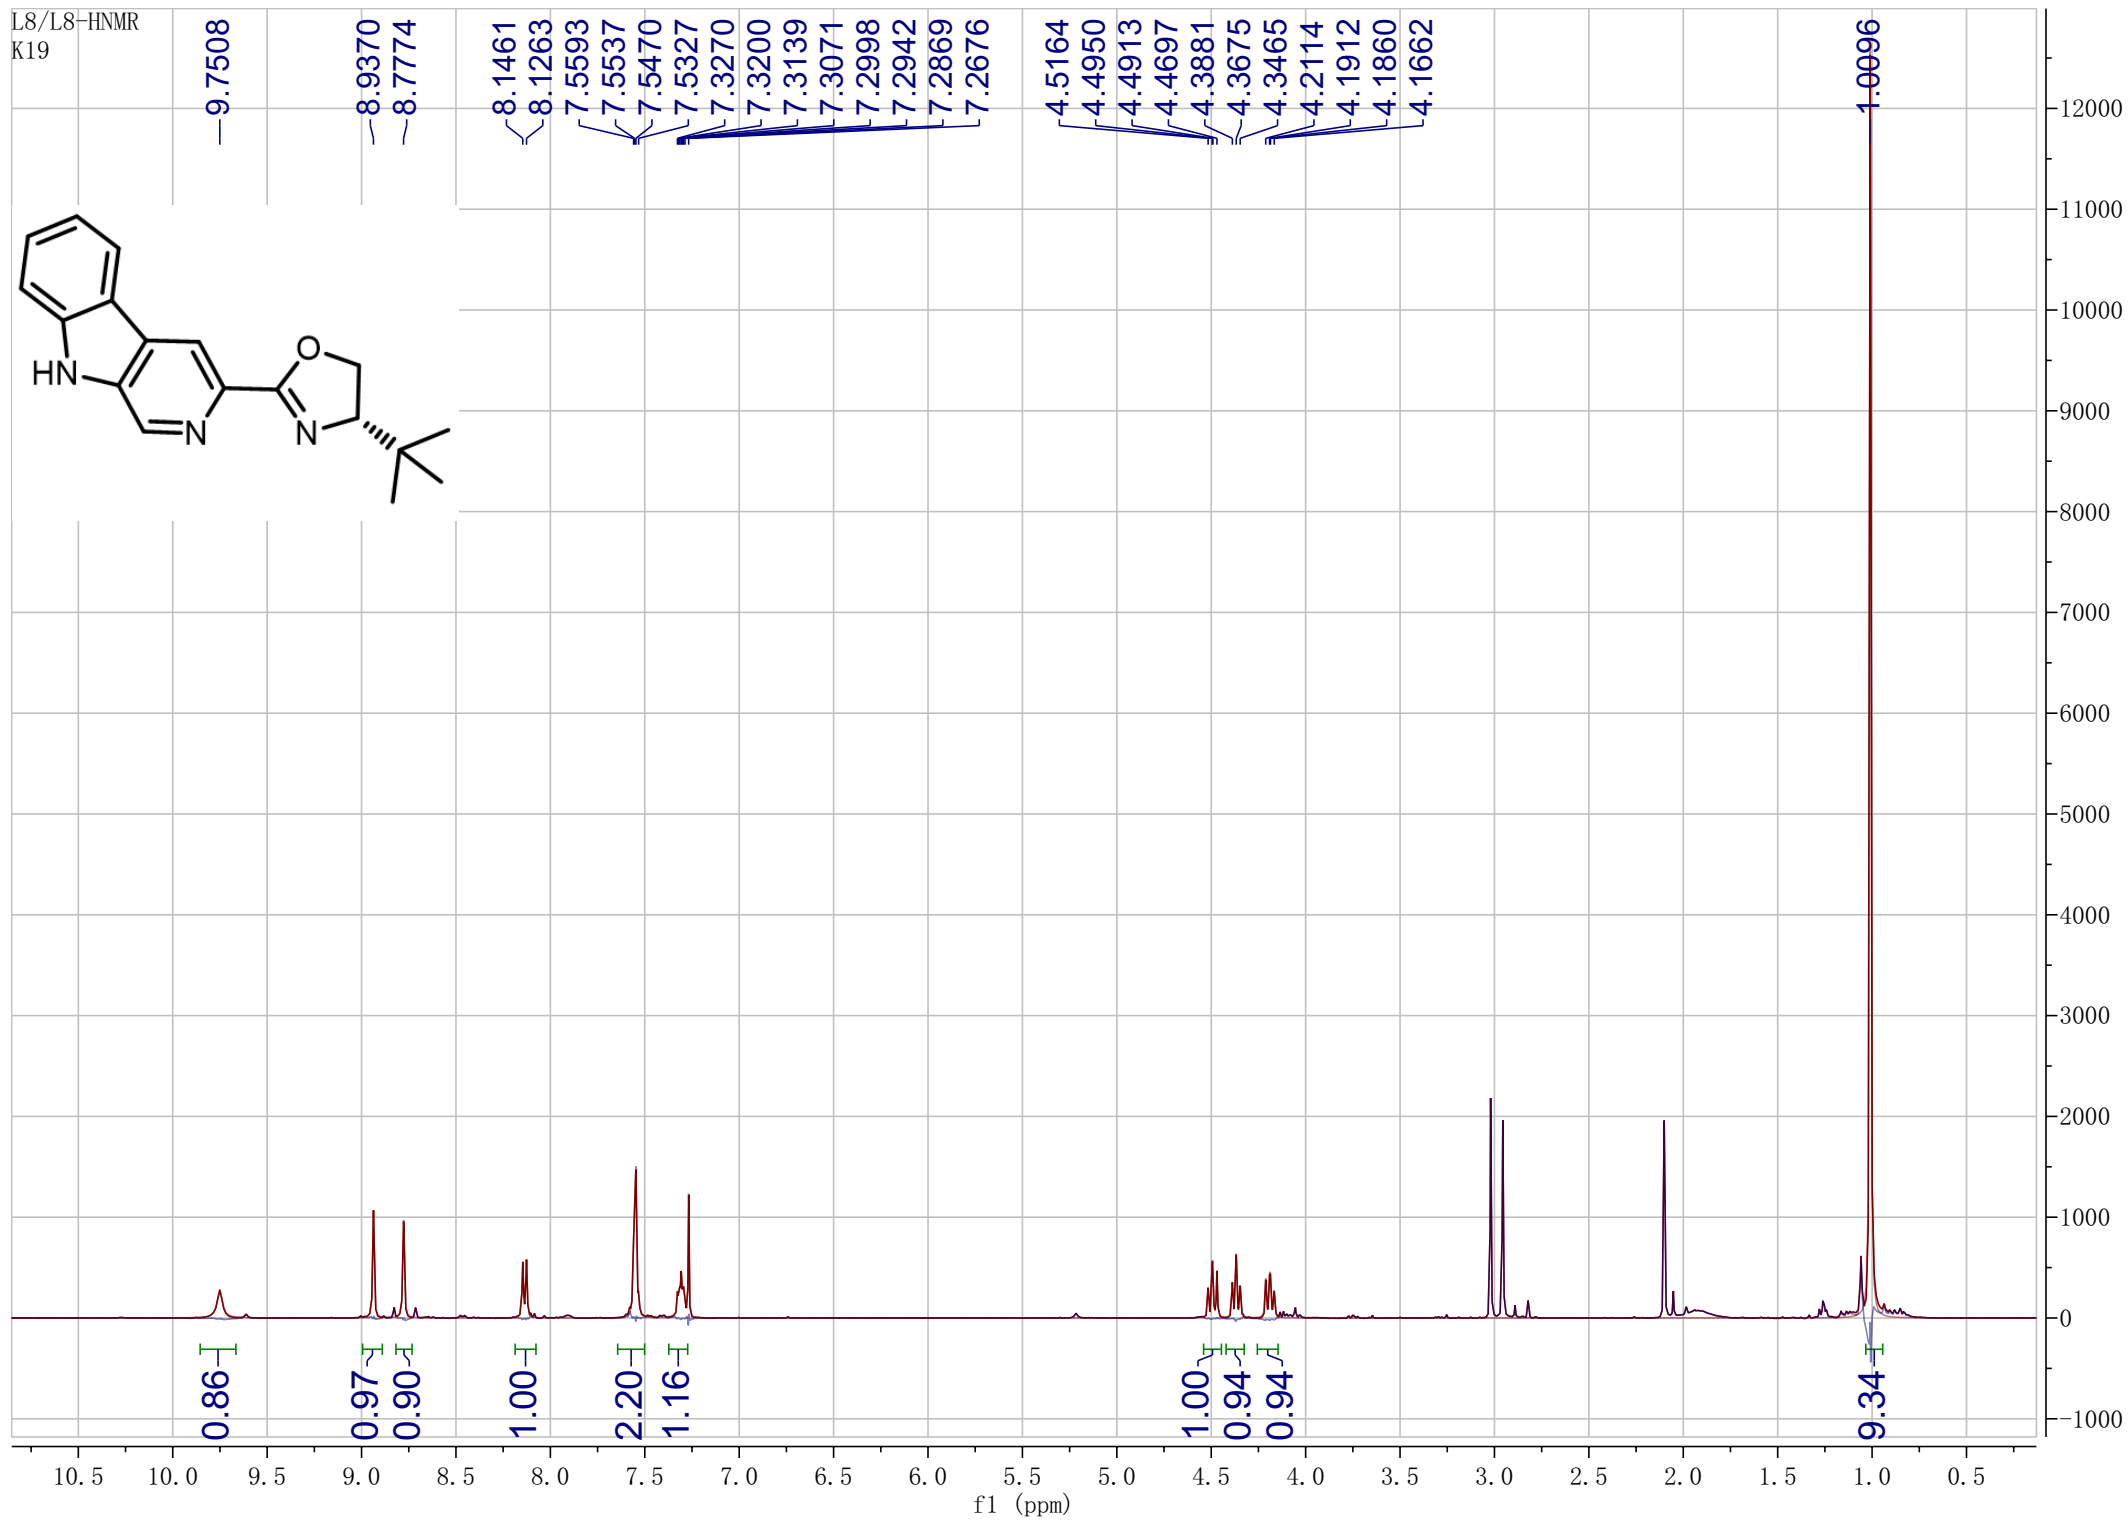

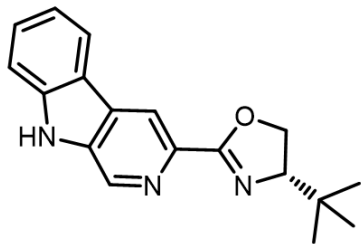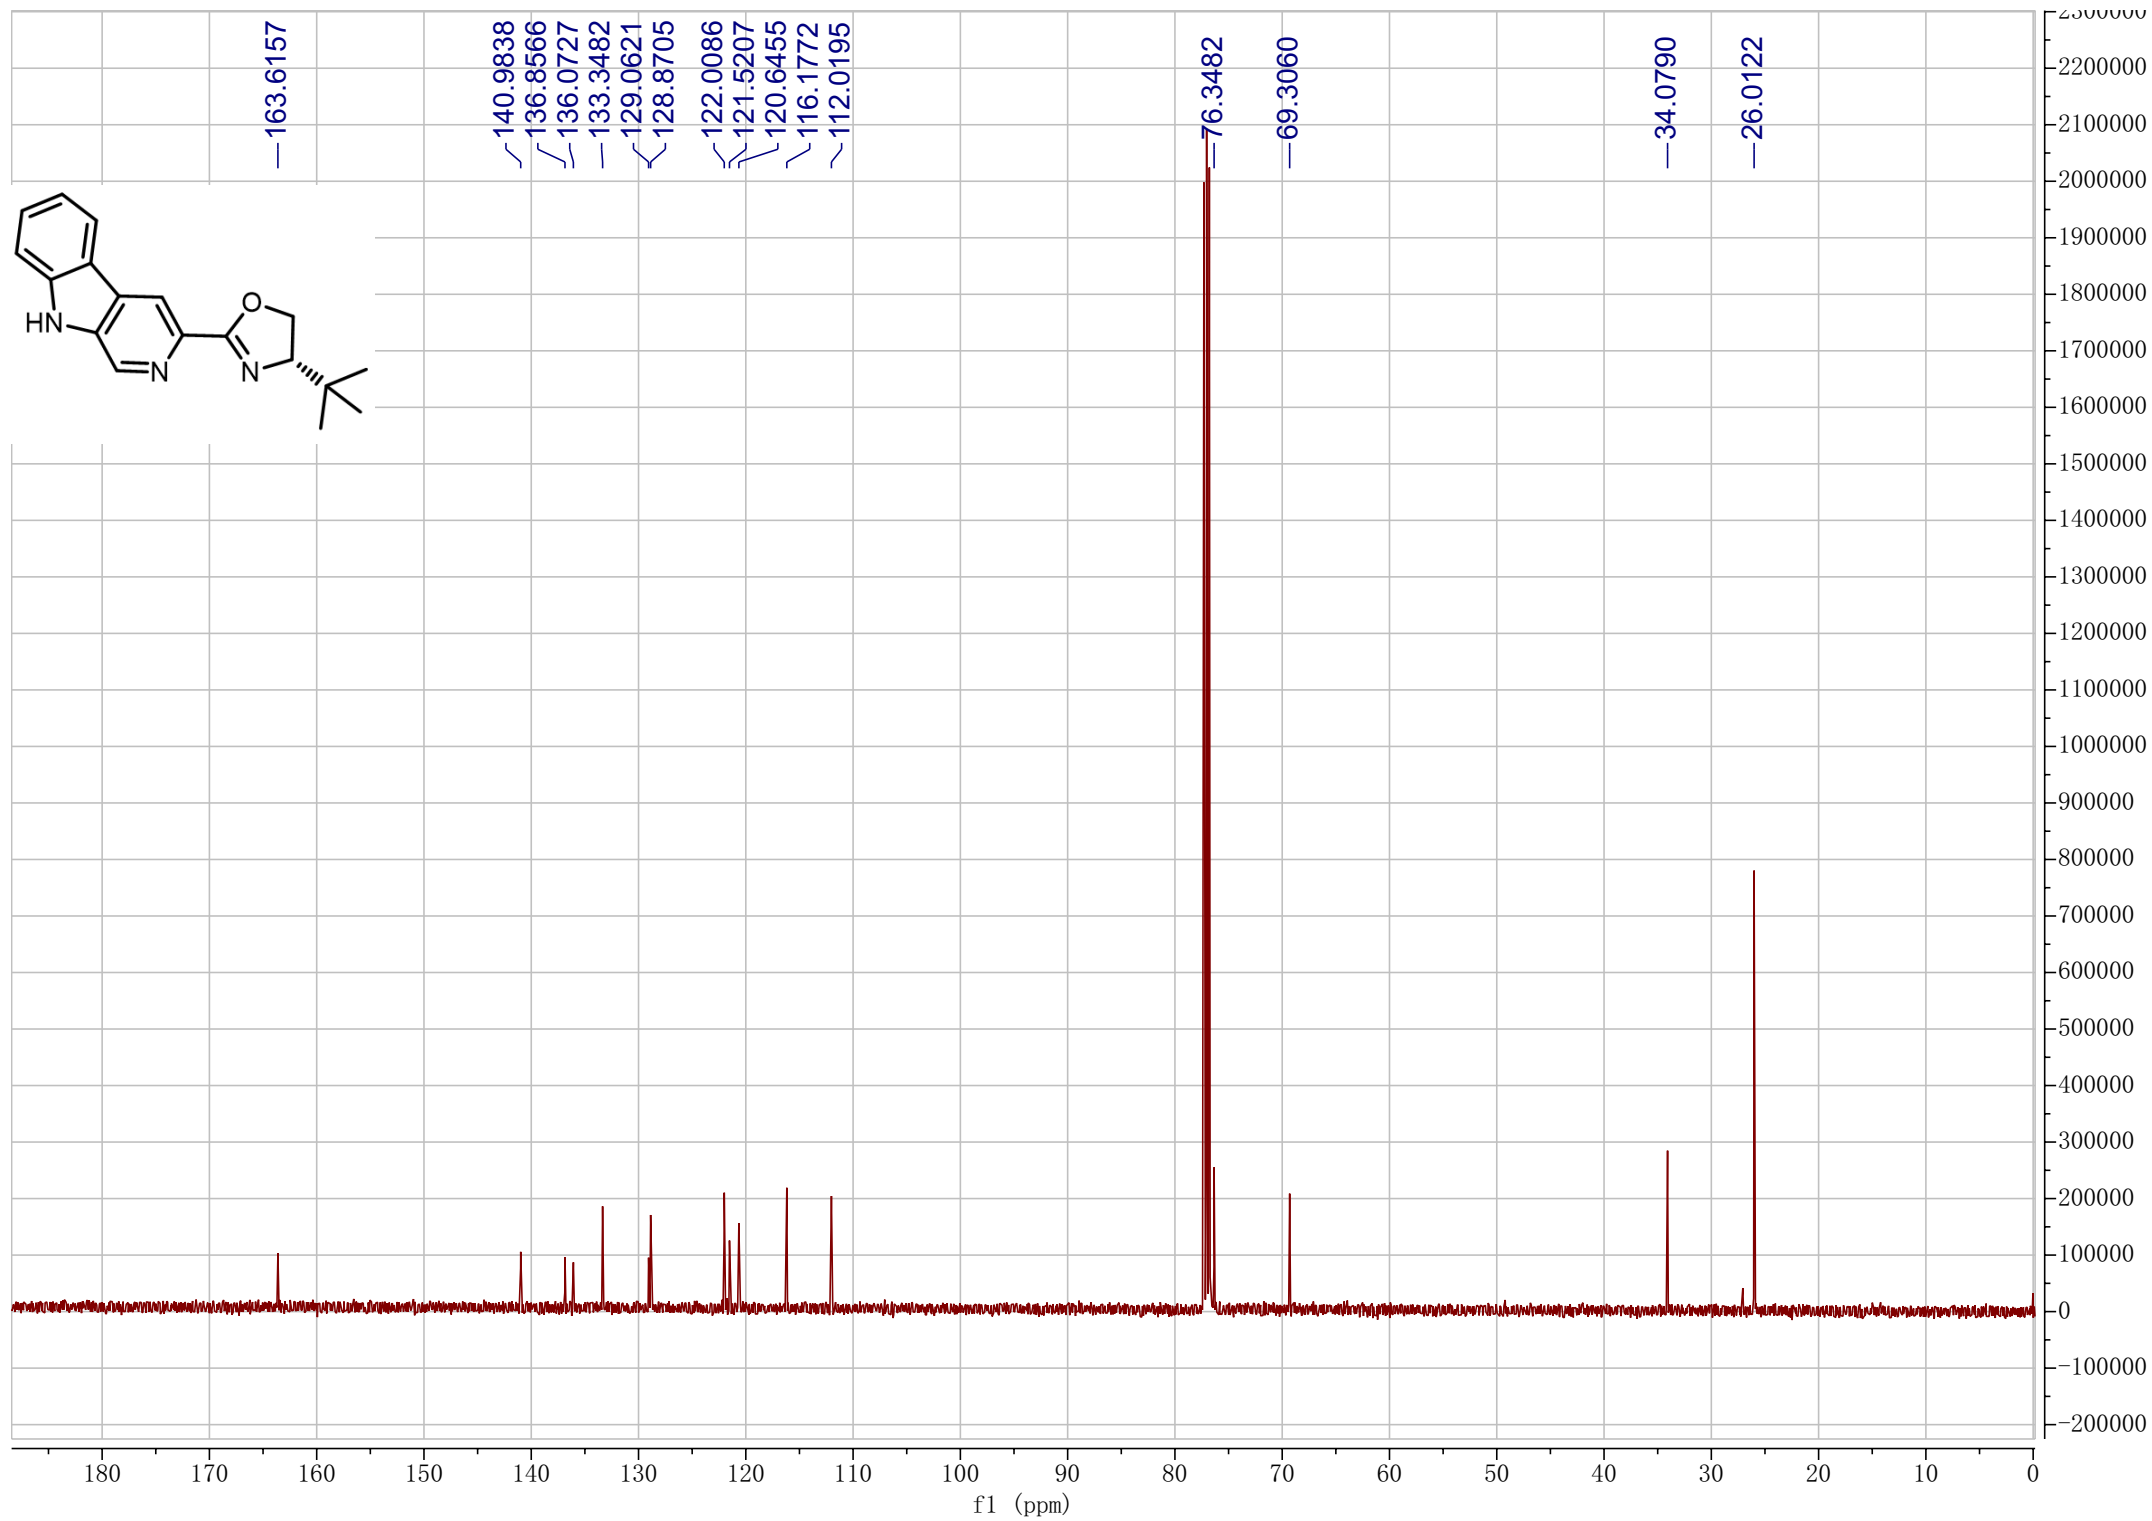



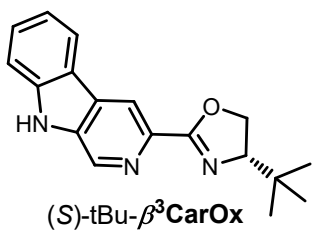

20190506-26 185 (1.408) Cm (182:187)

1: TOF MS ES+  
2.72e8

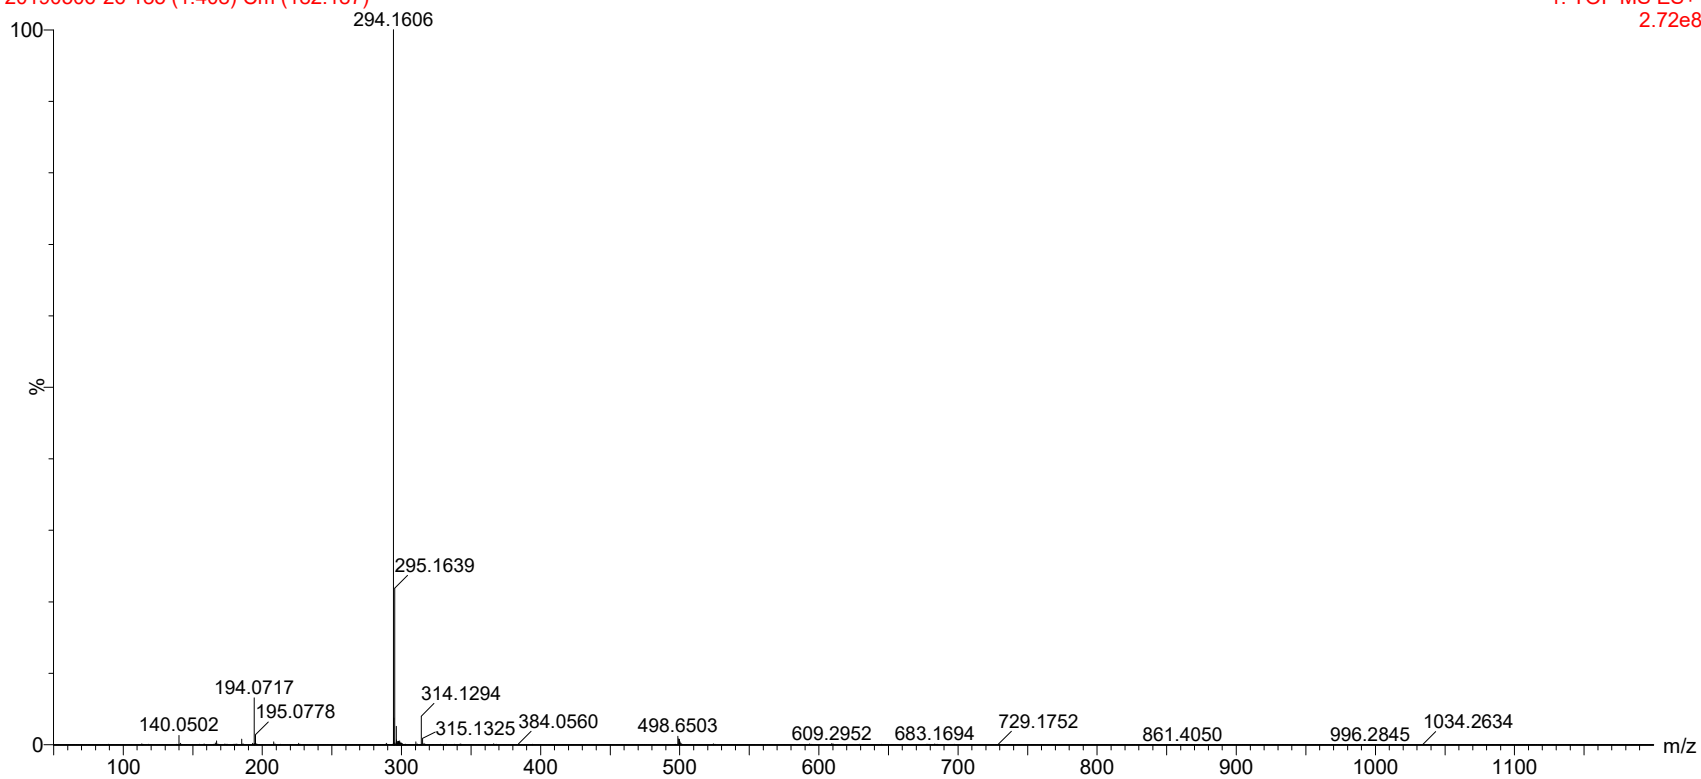

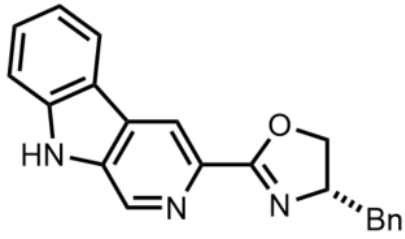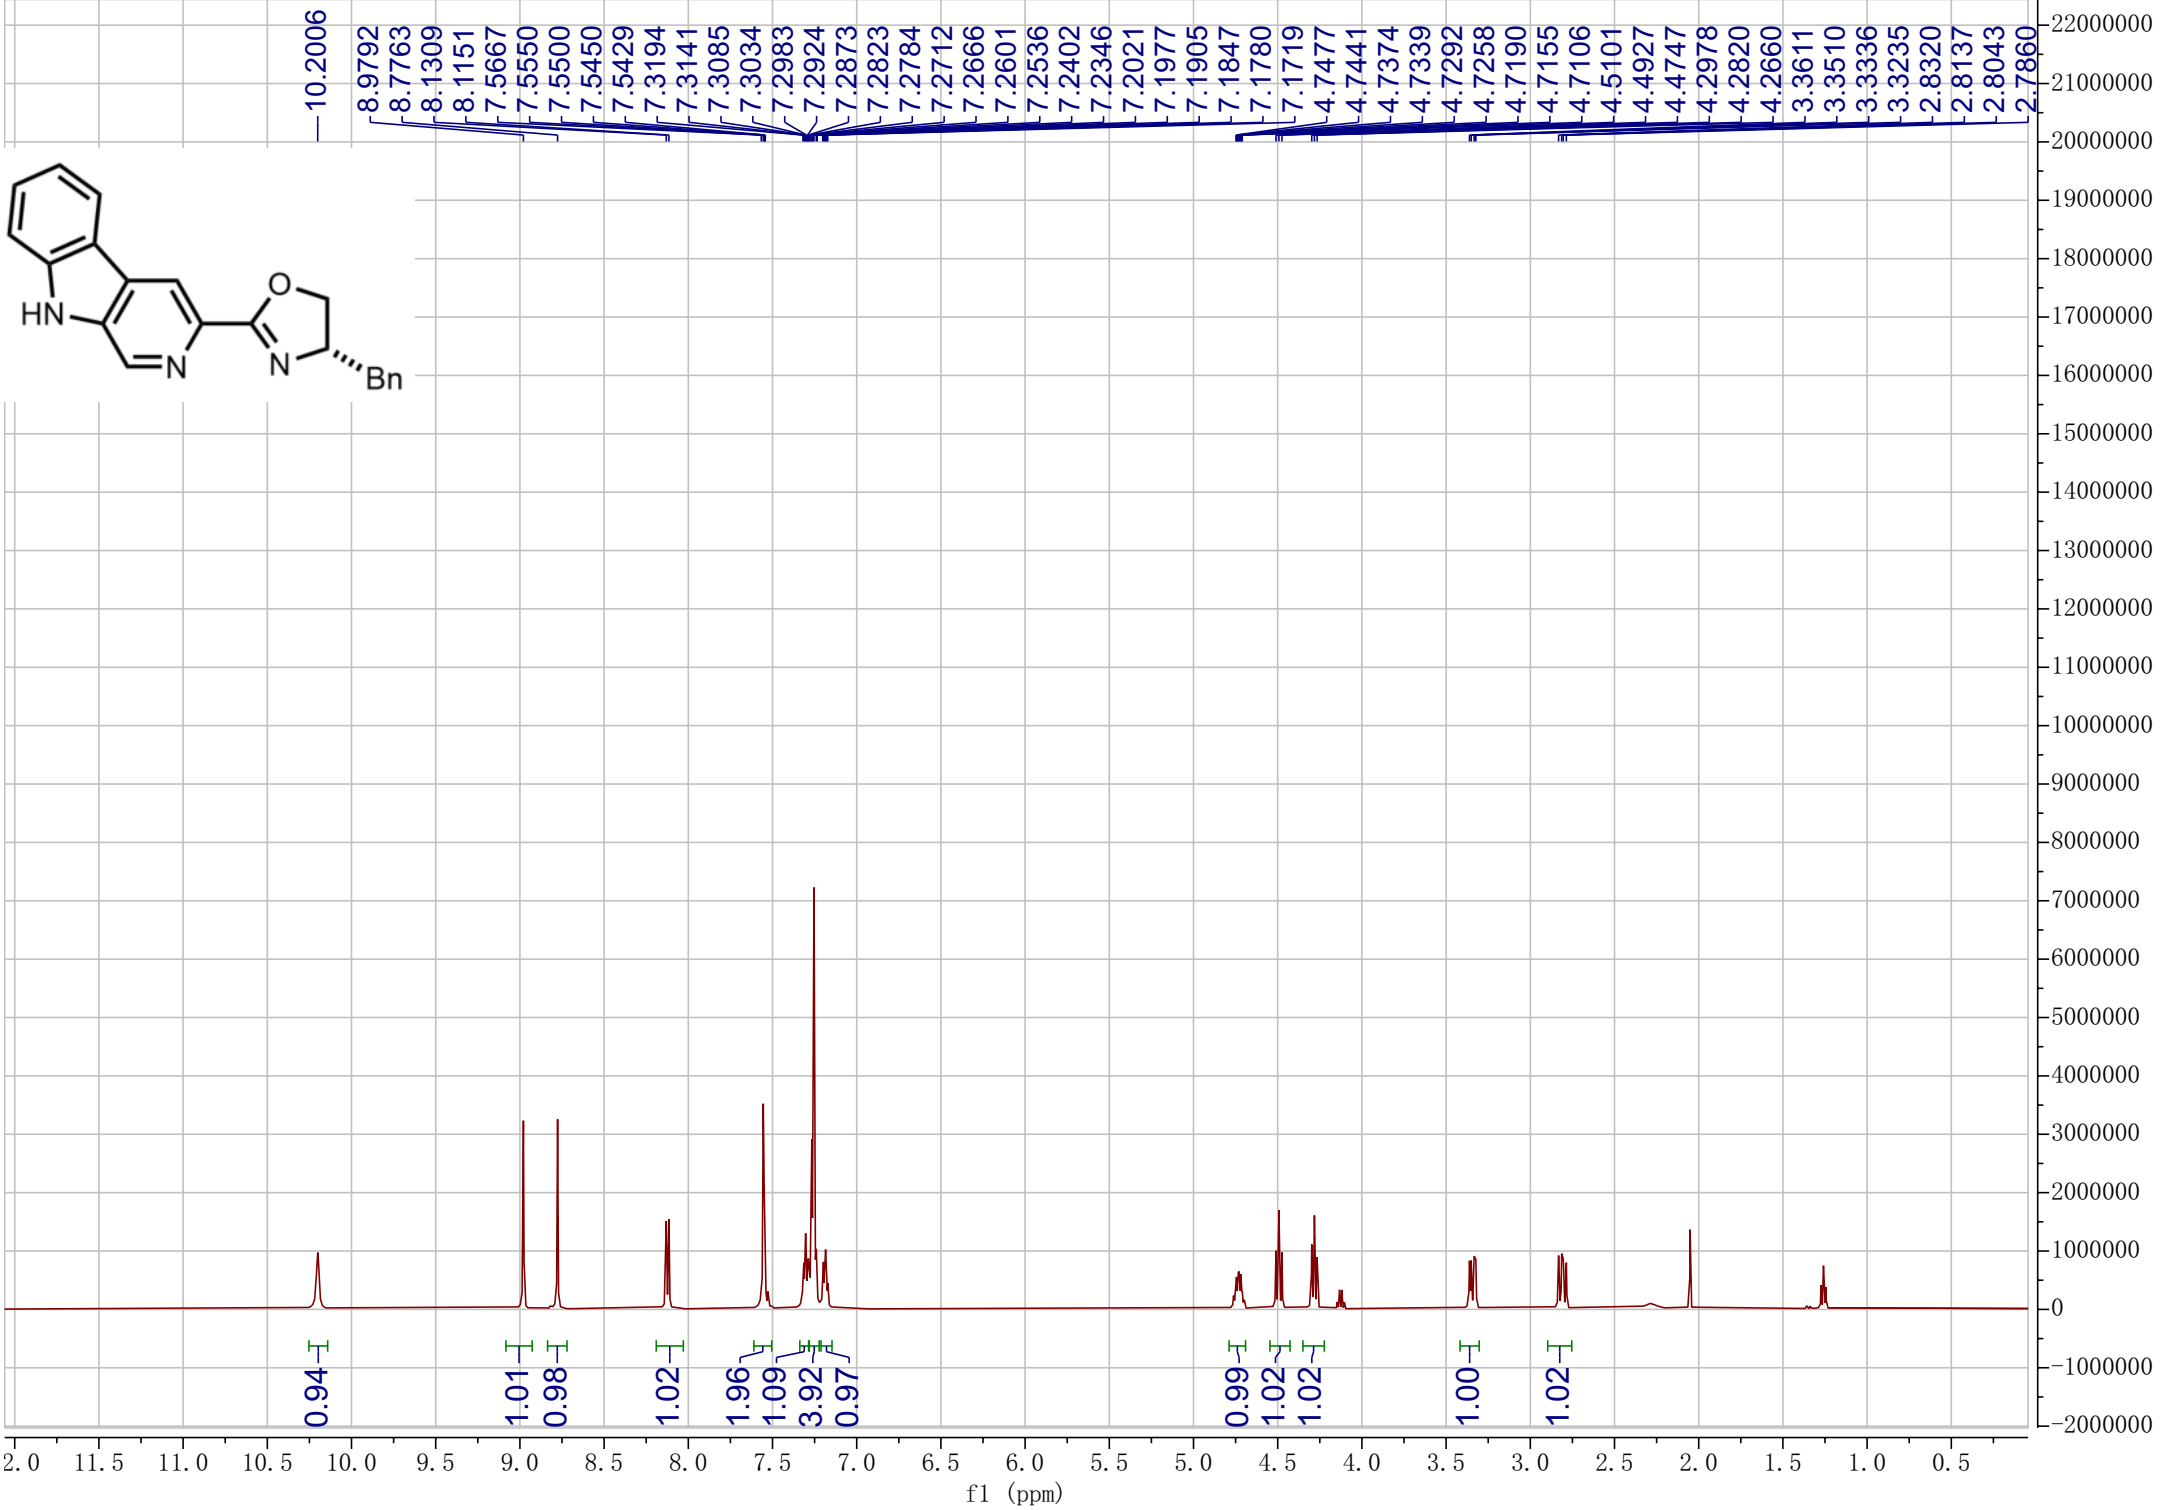

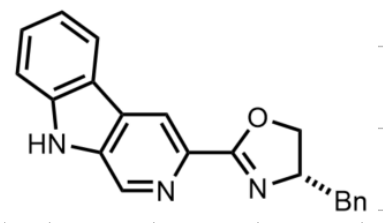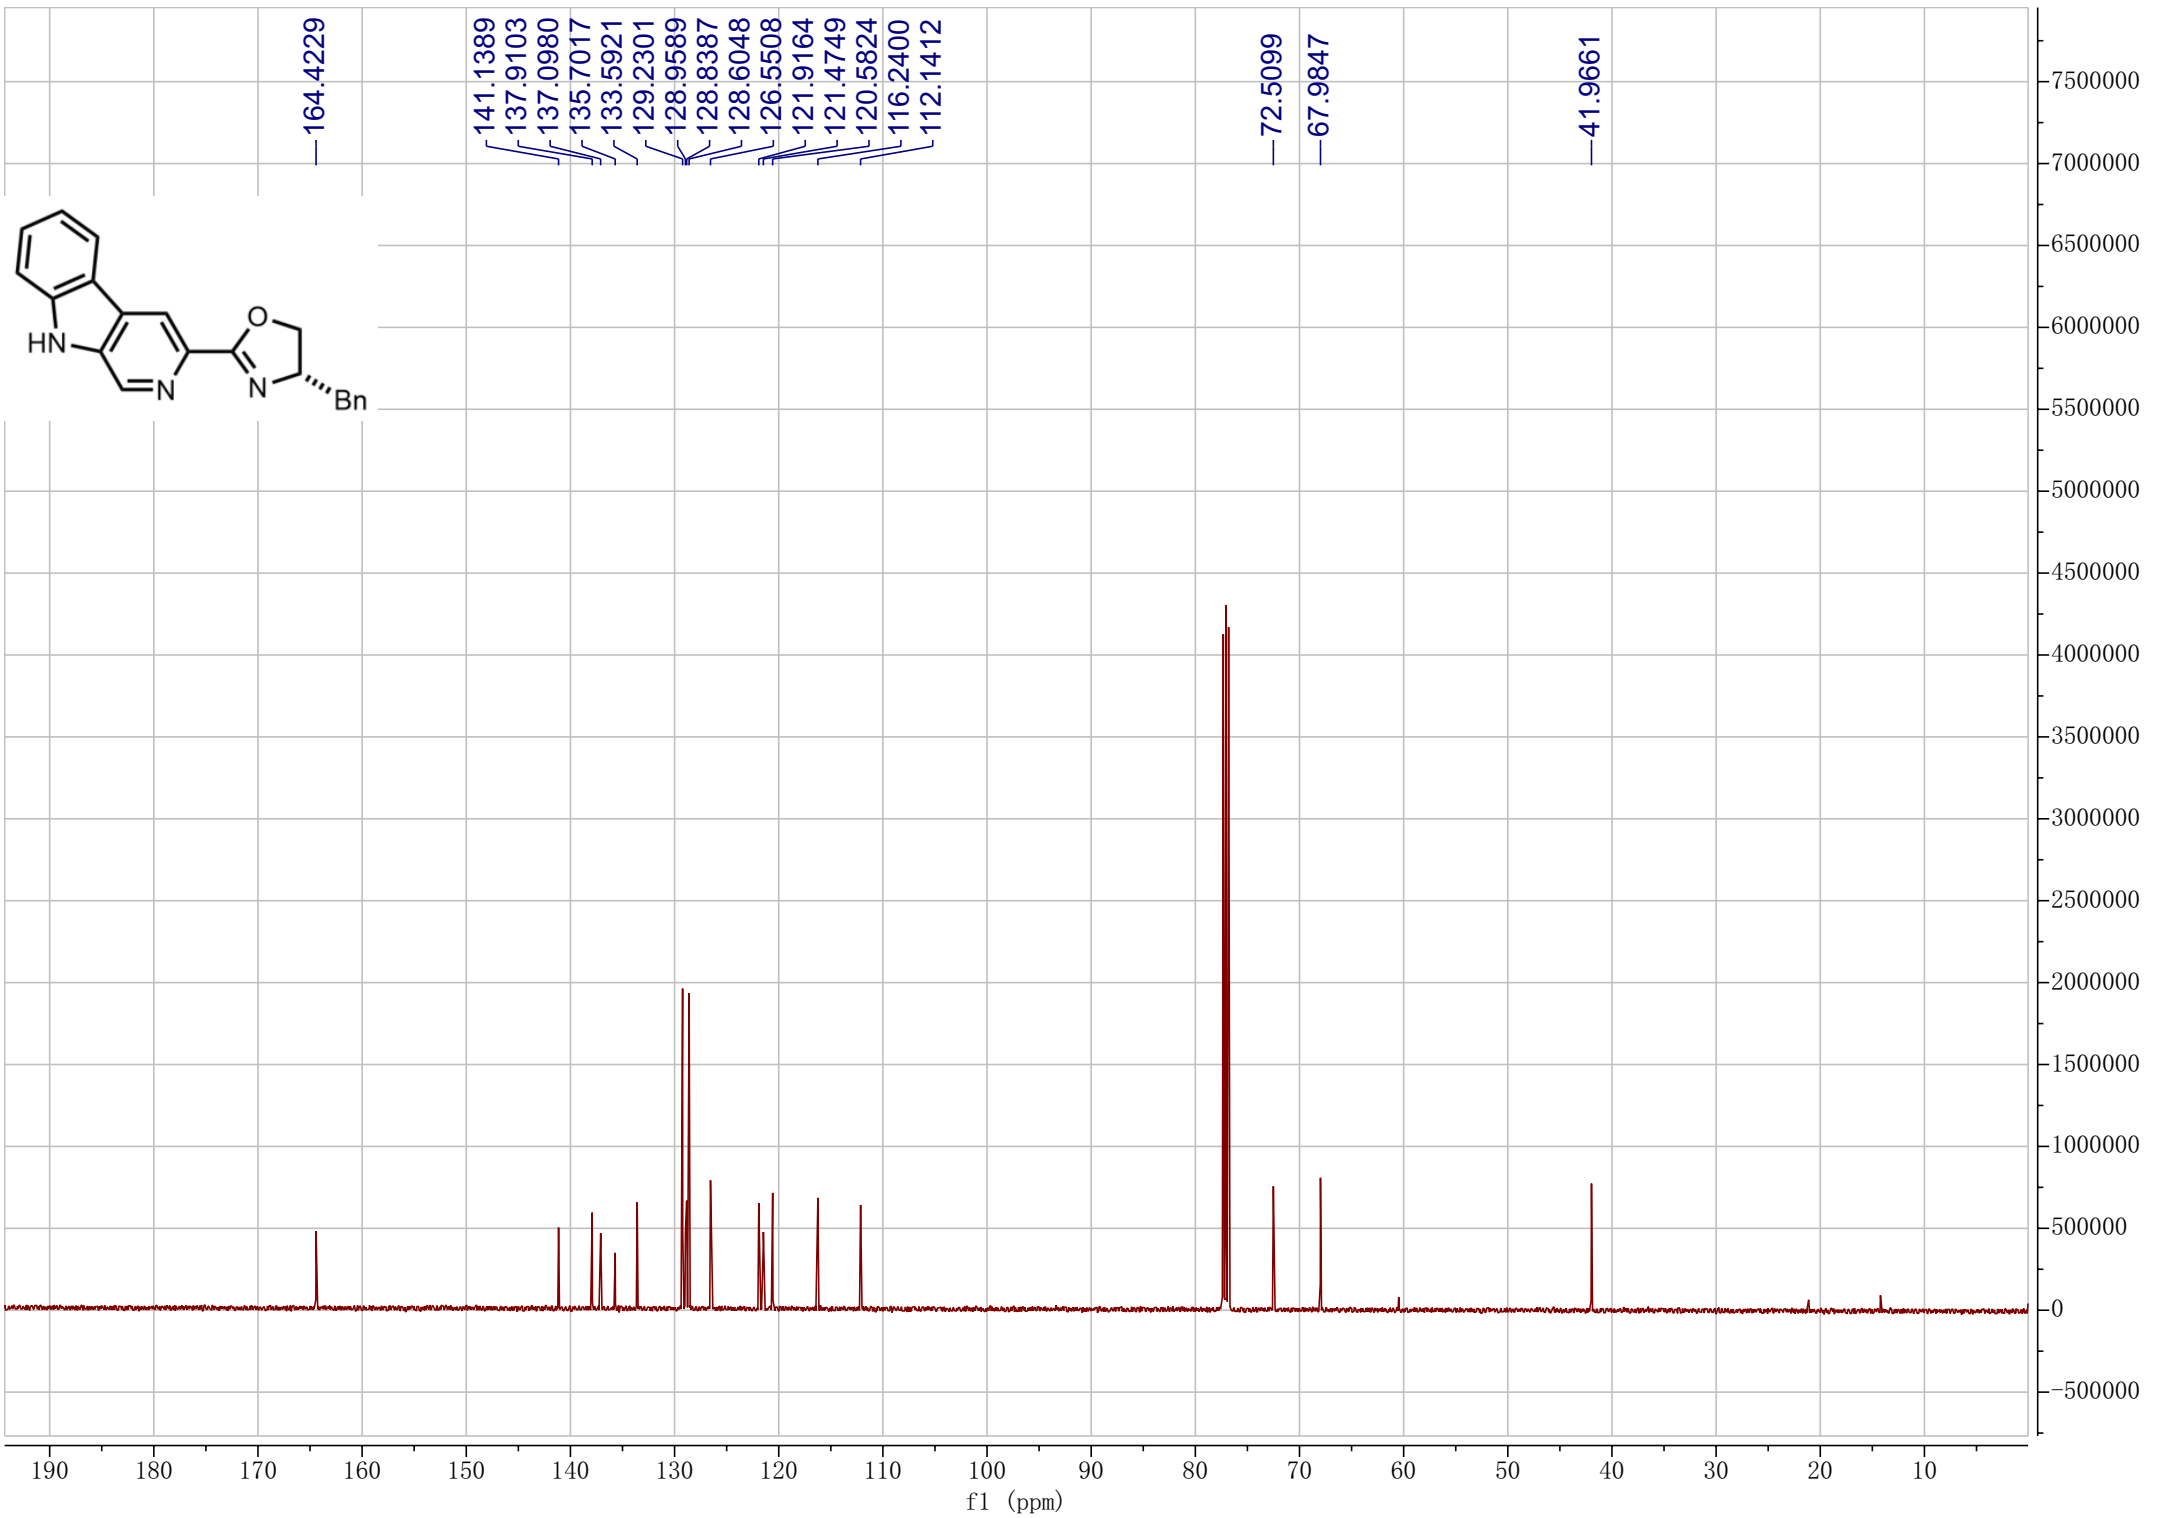

20200618-13 275 (2.070)

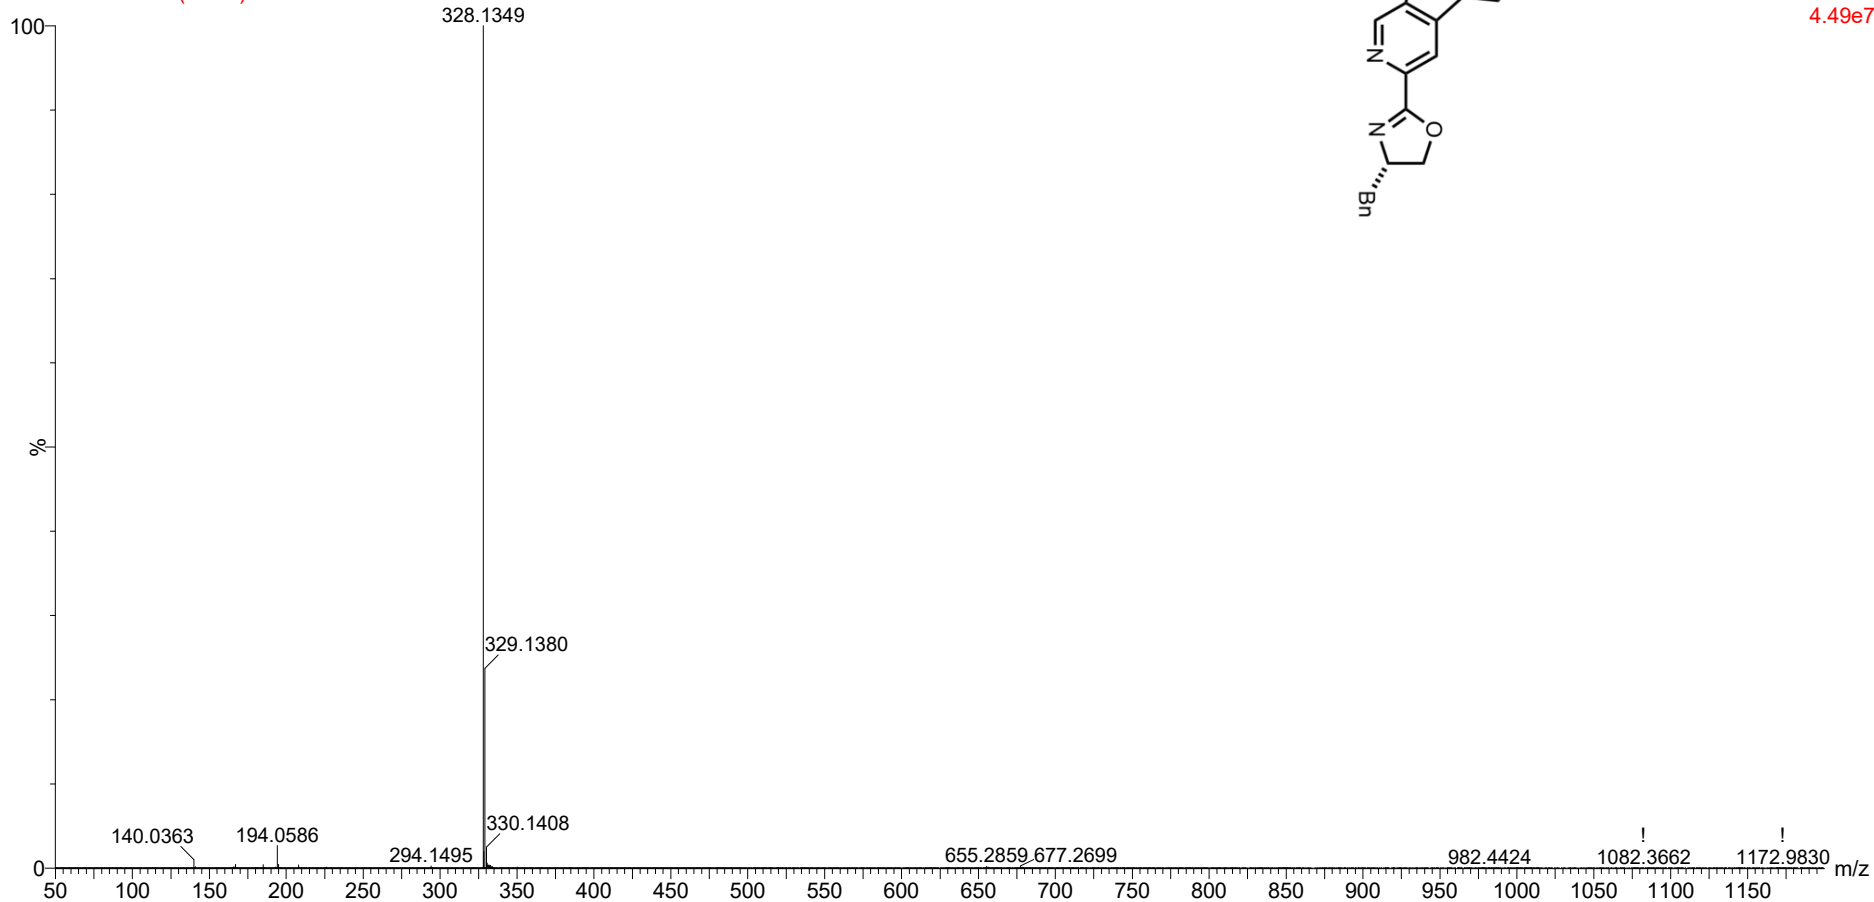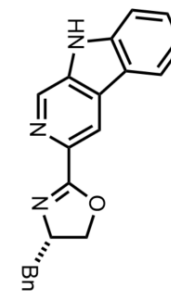

1: TOF MS ES+  
4.49e7

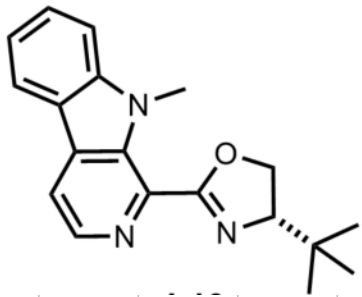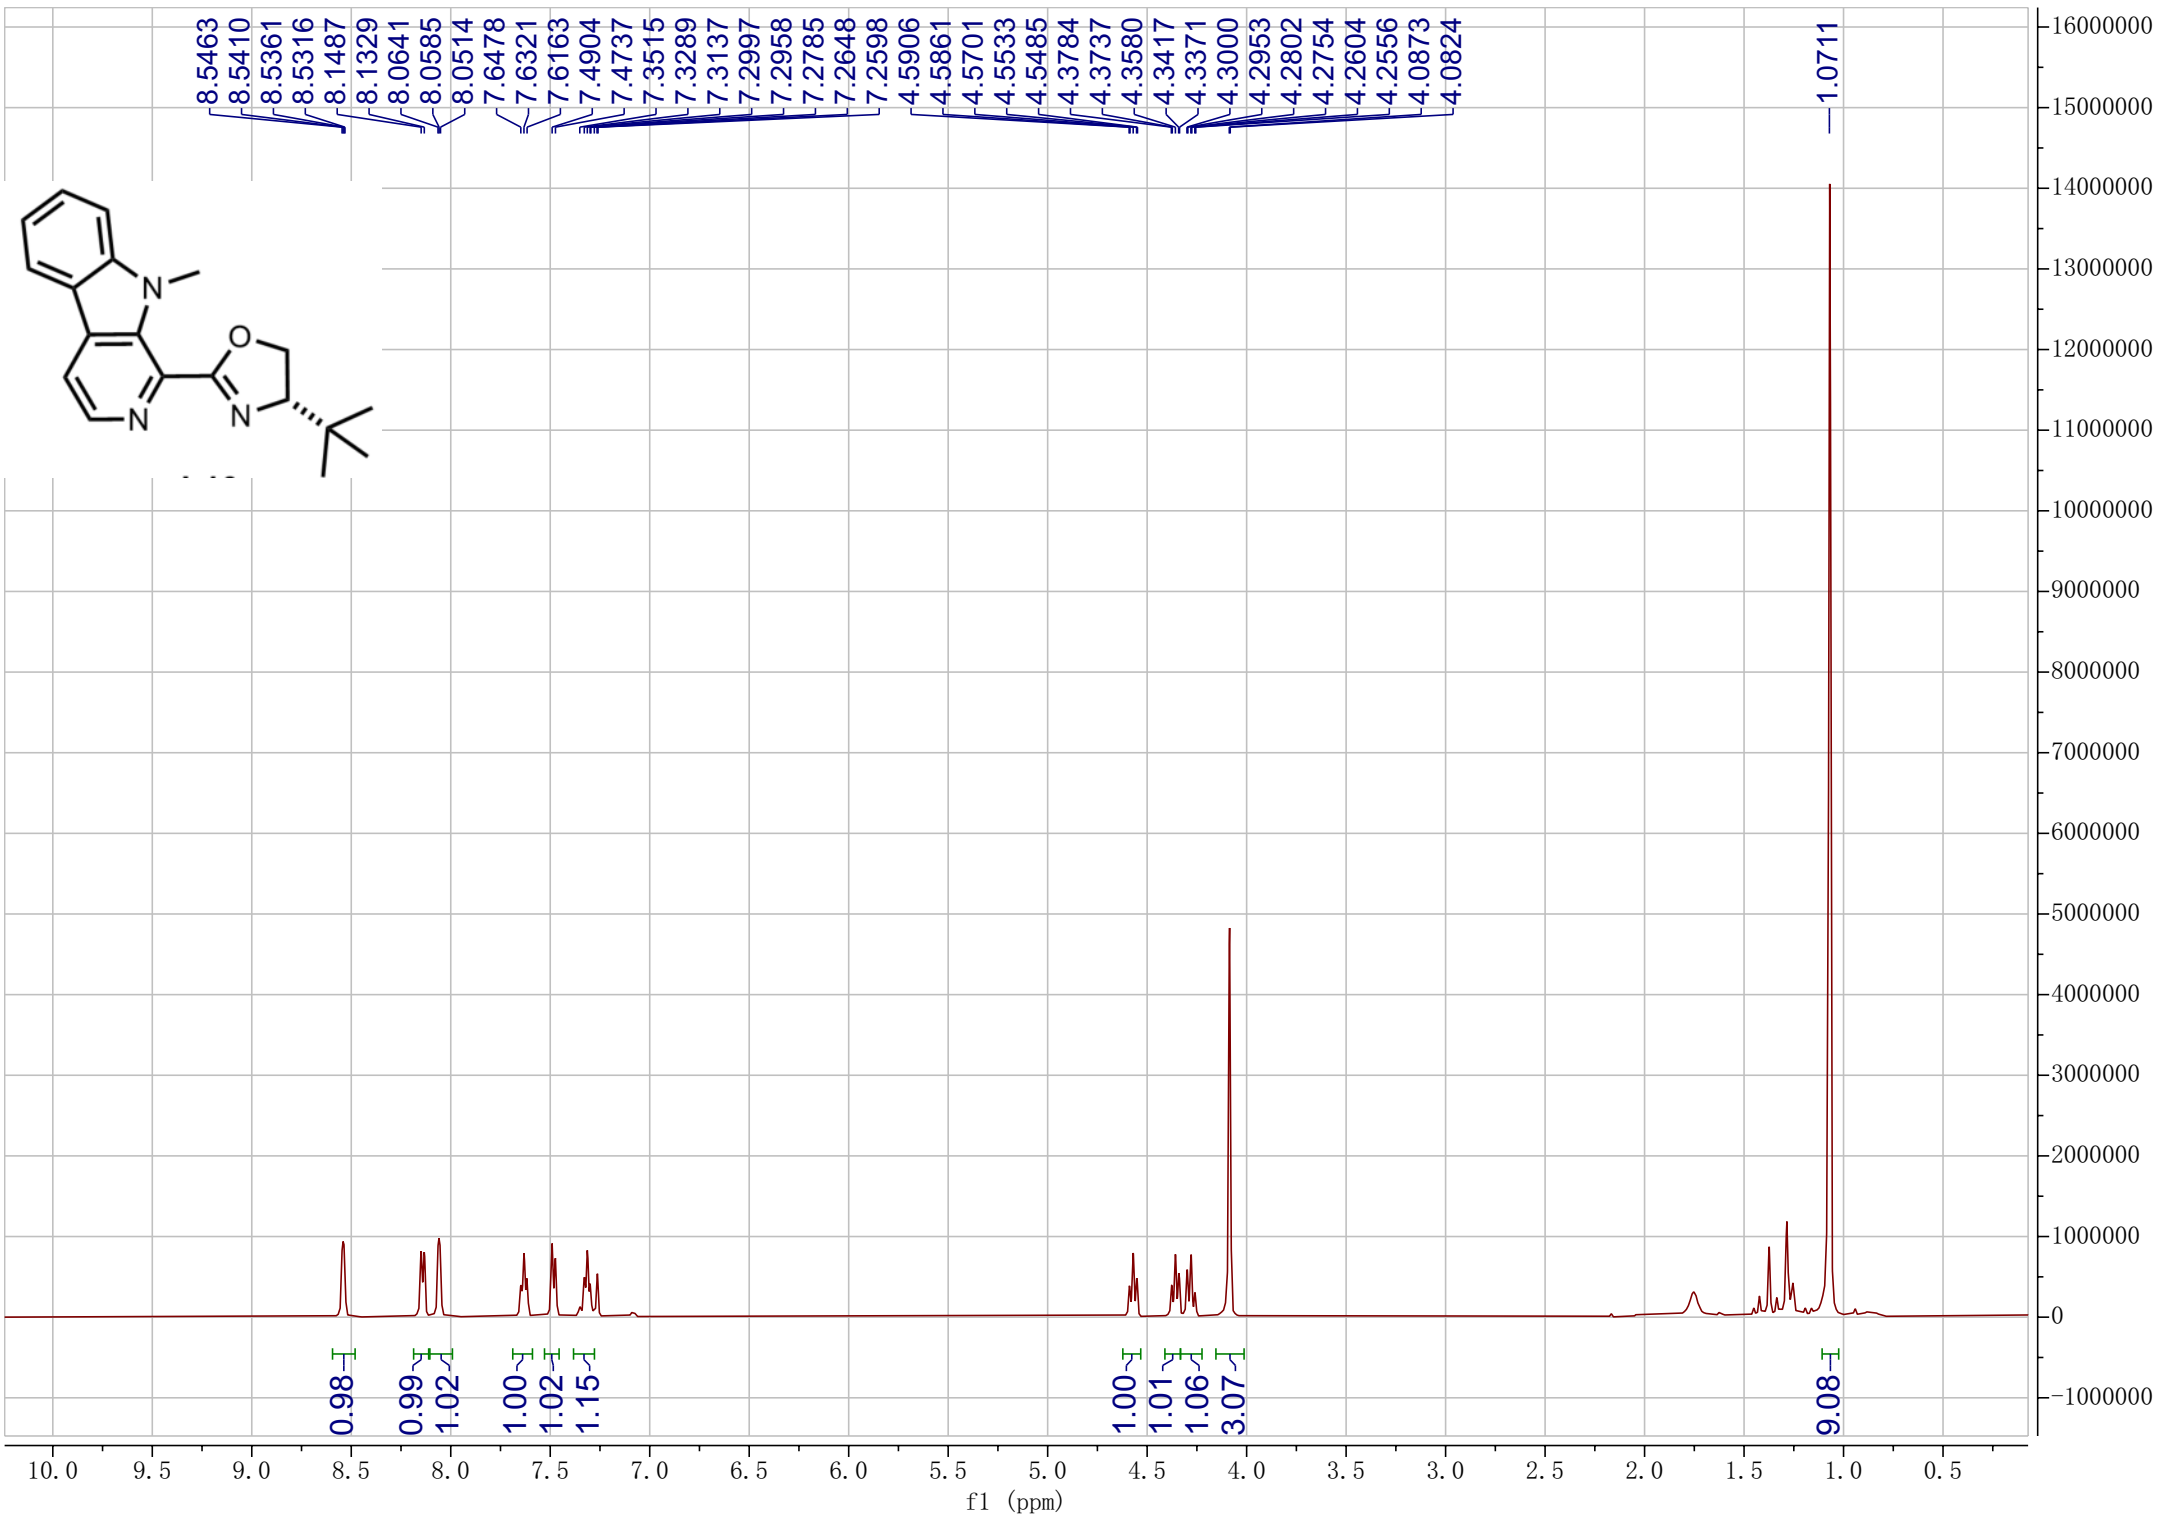

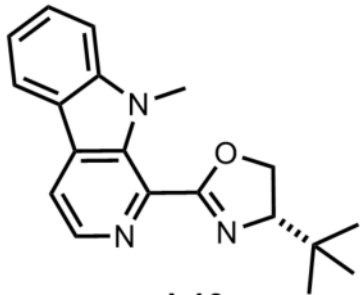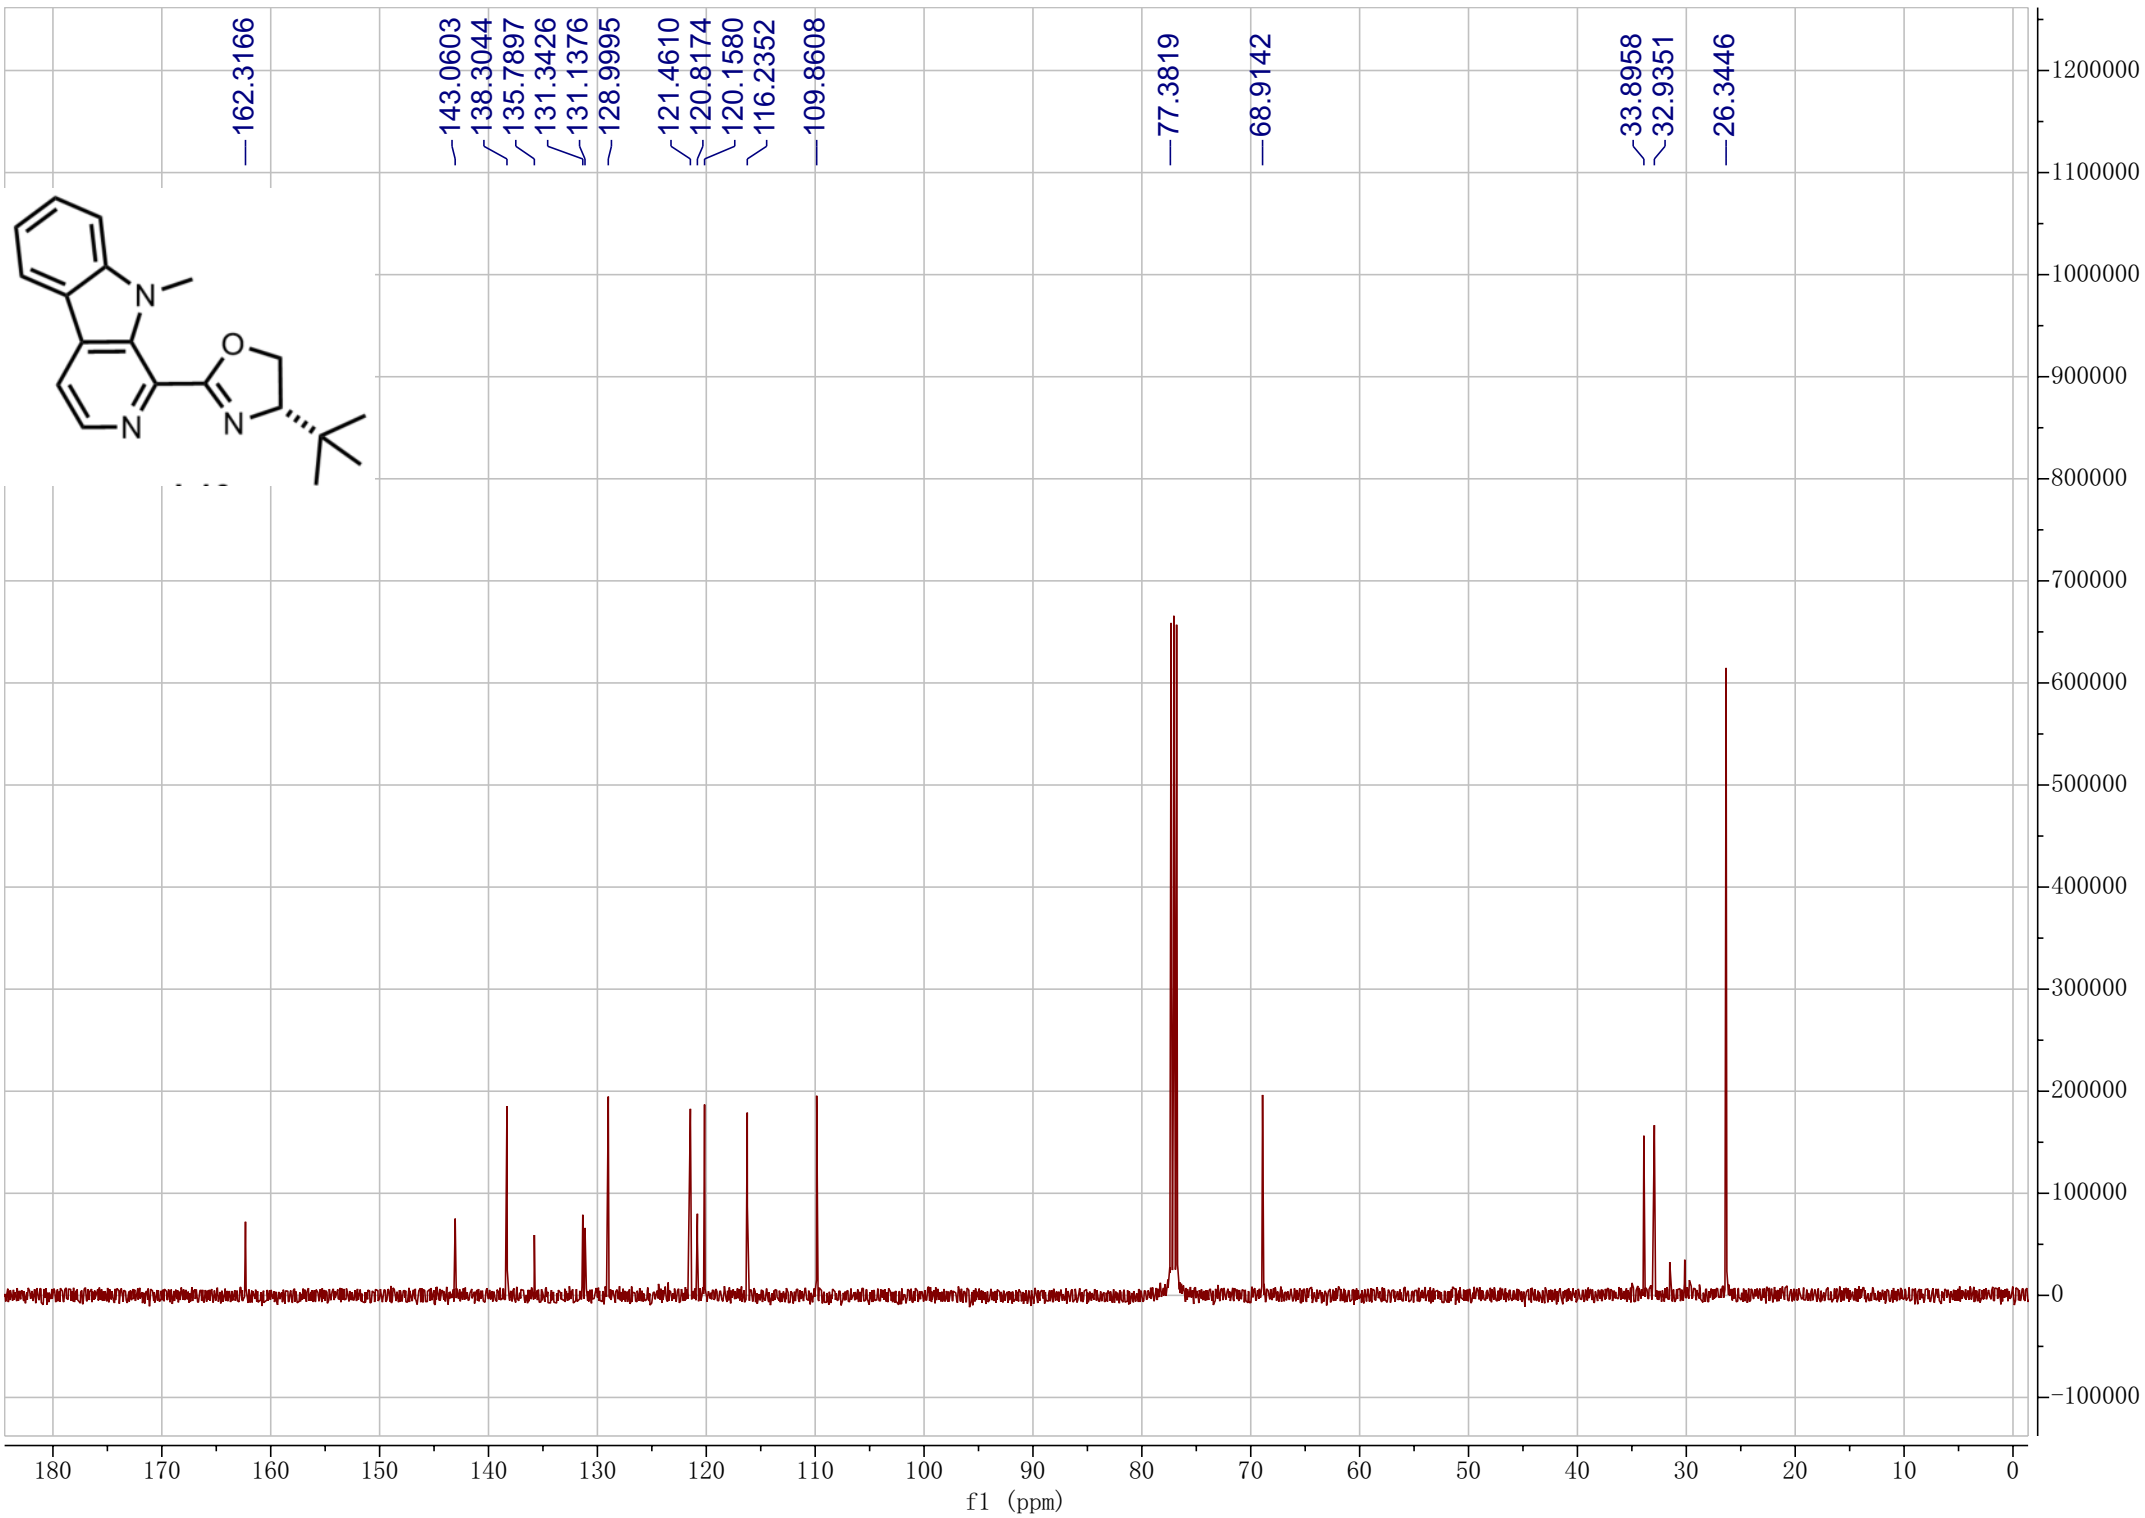

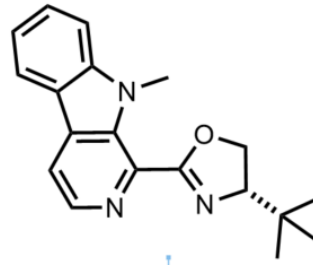

1: TOF MS ES+  
2.90e7

20200618-11 321 (2.421)

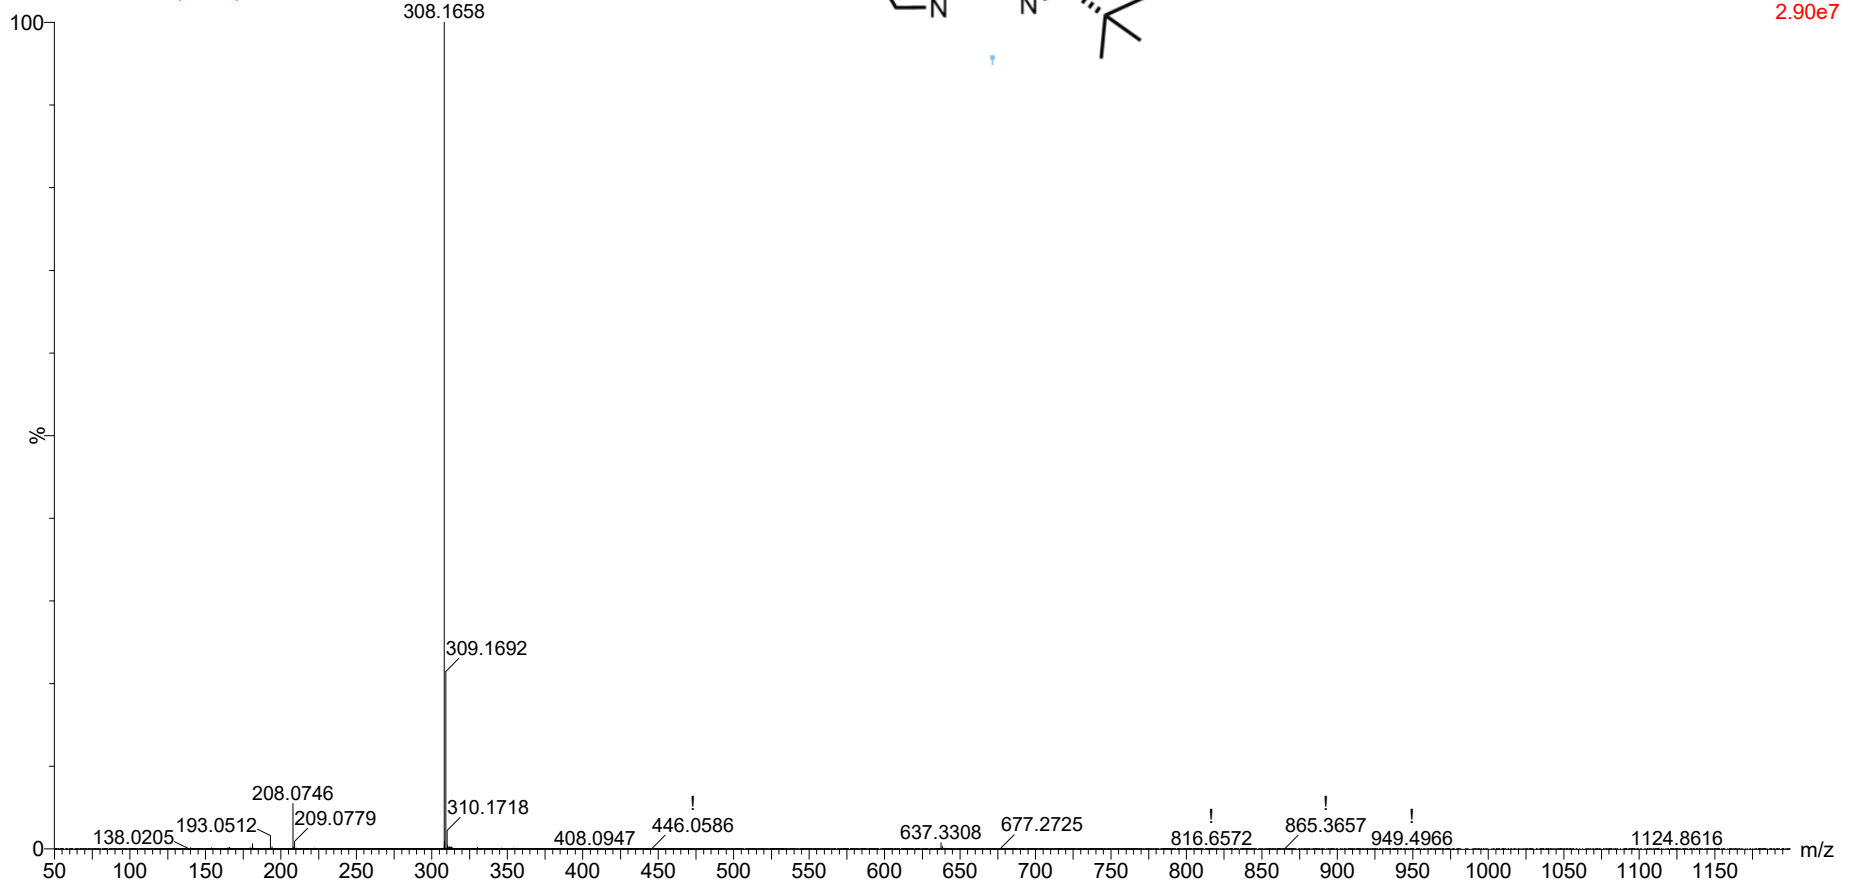

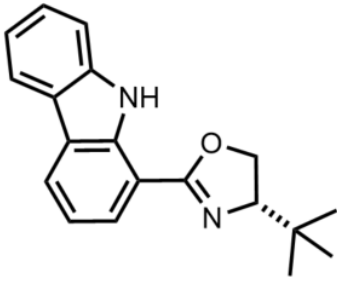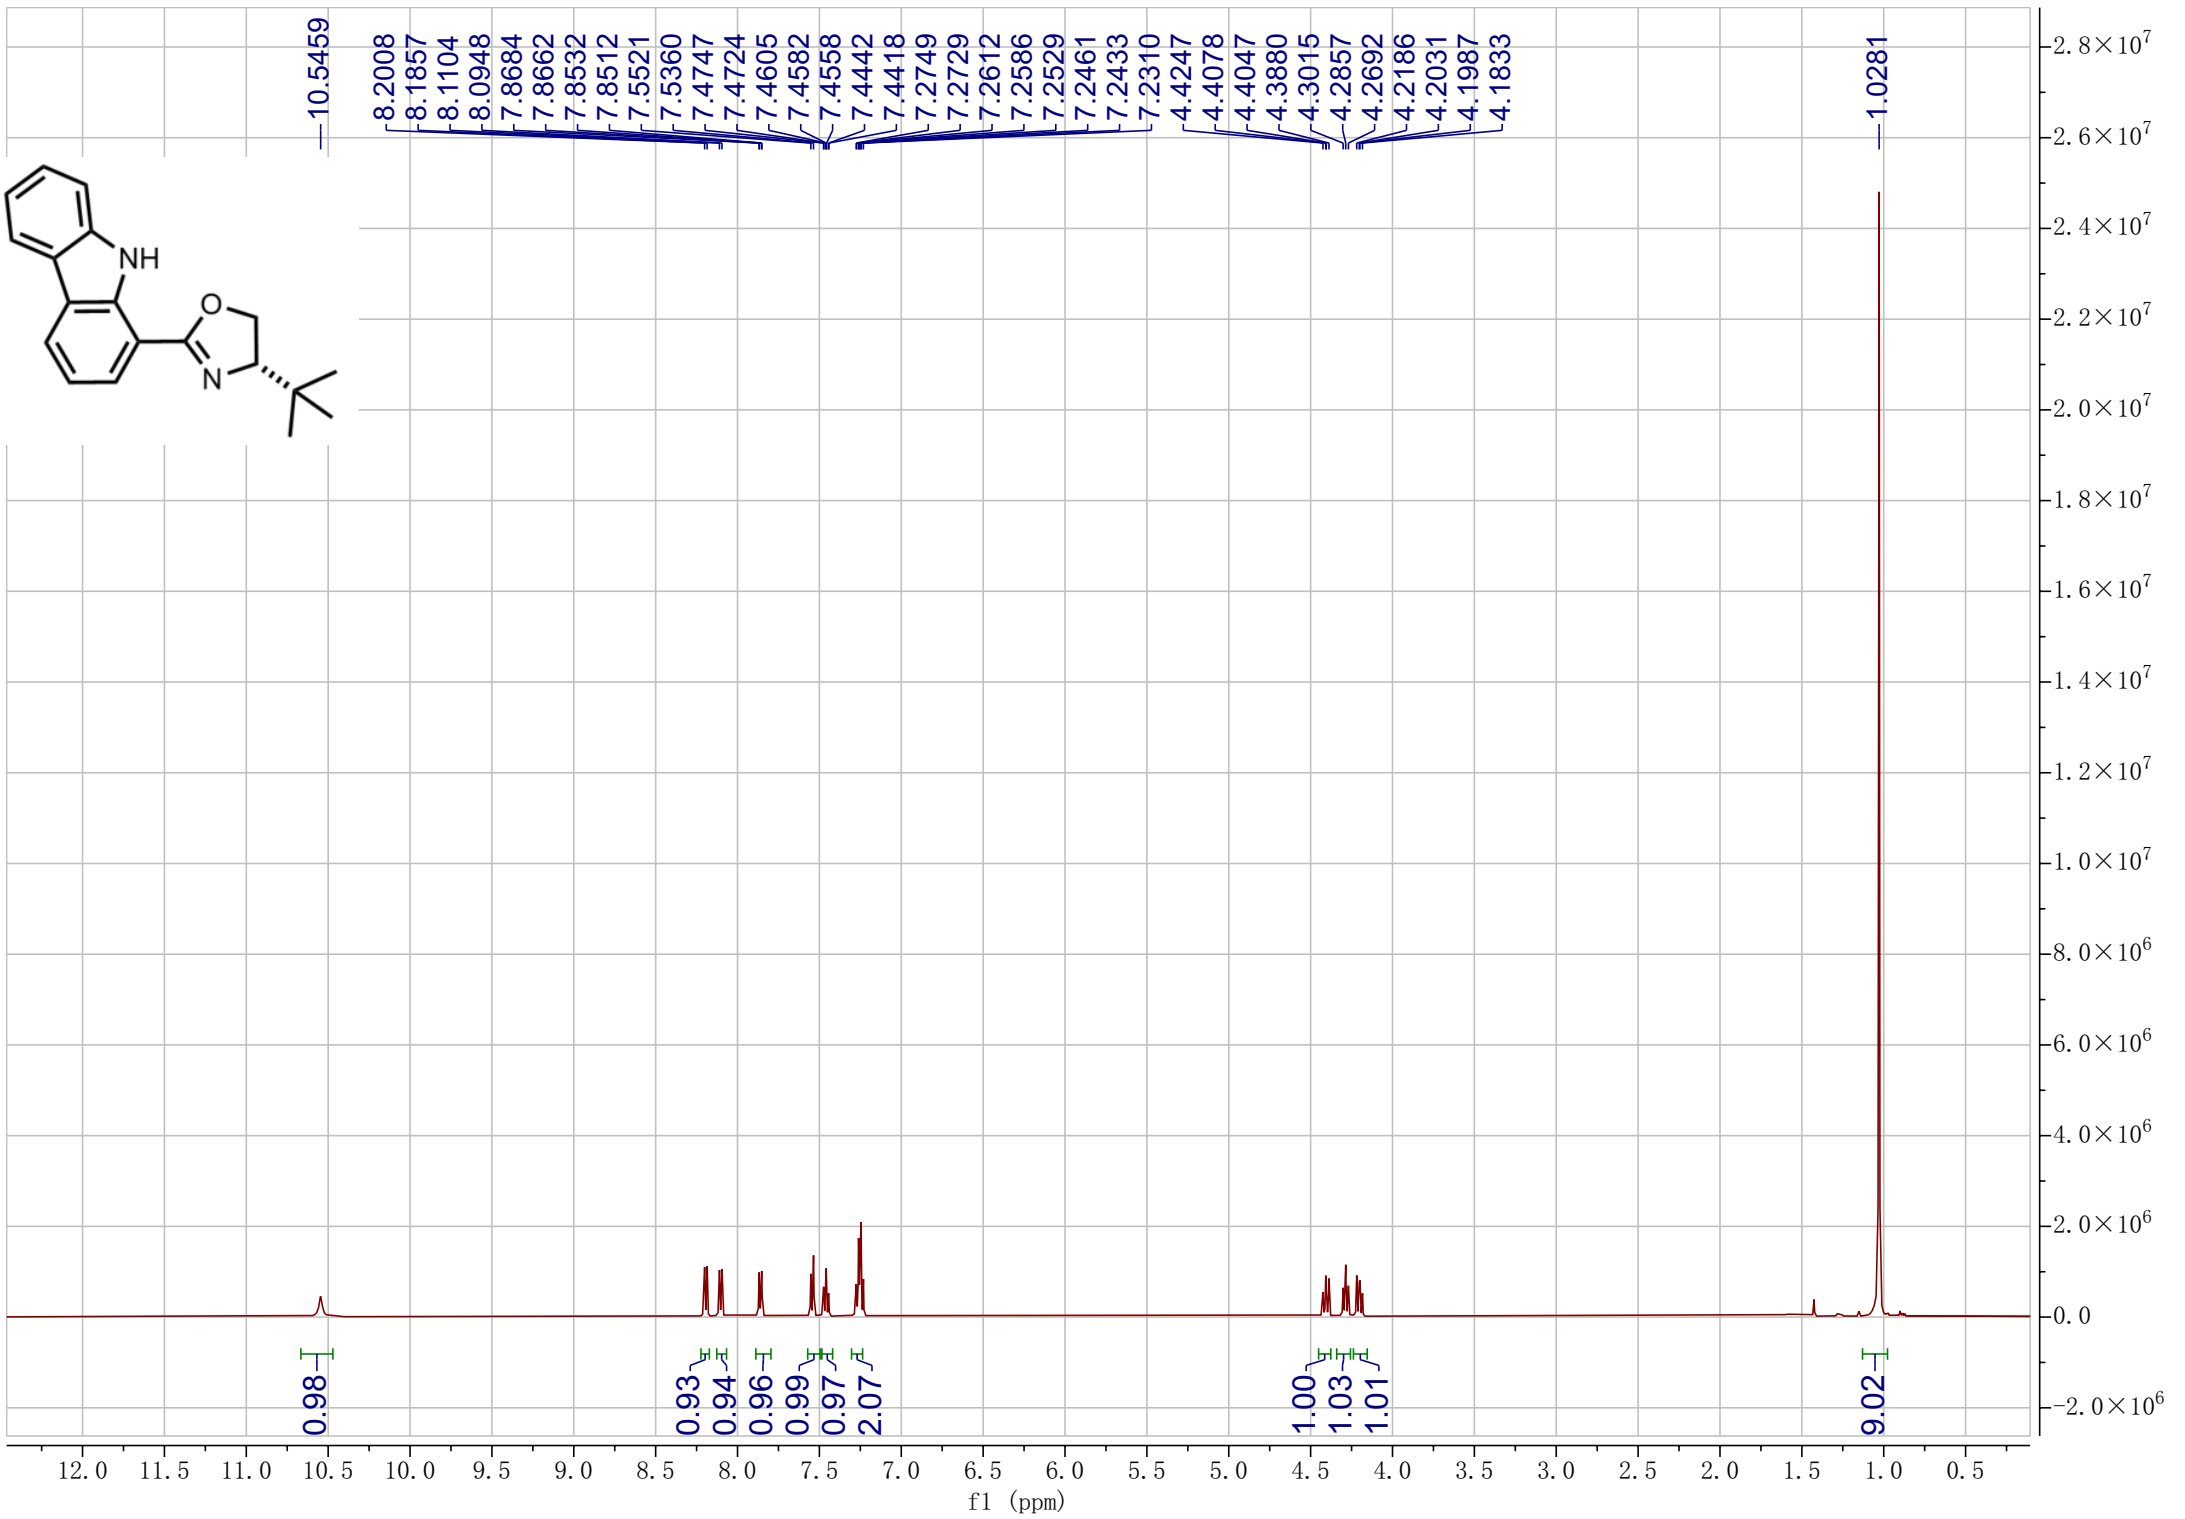



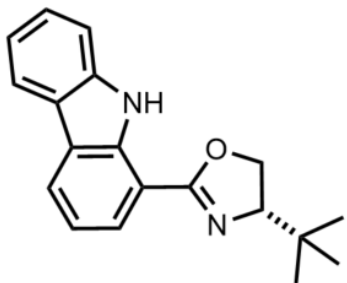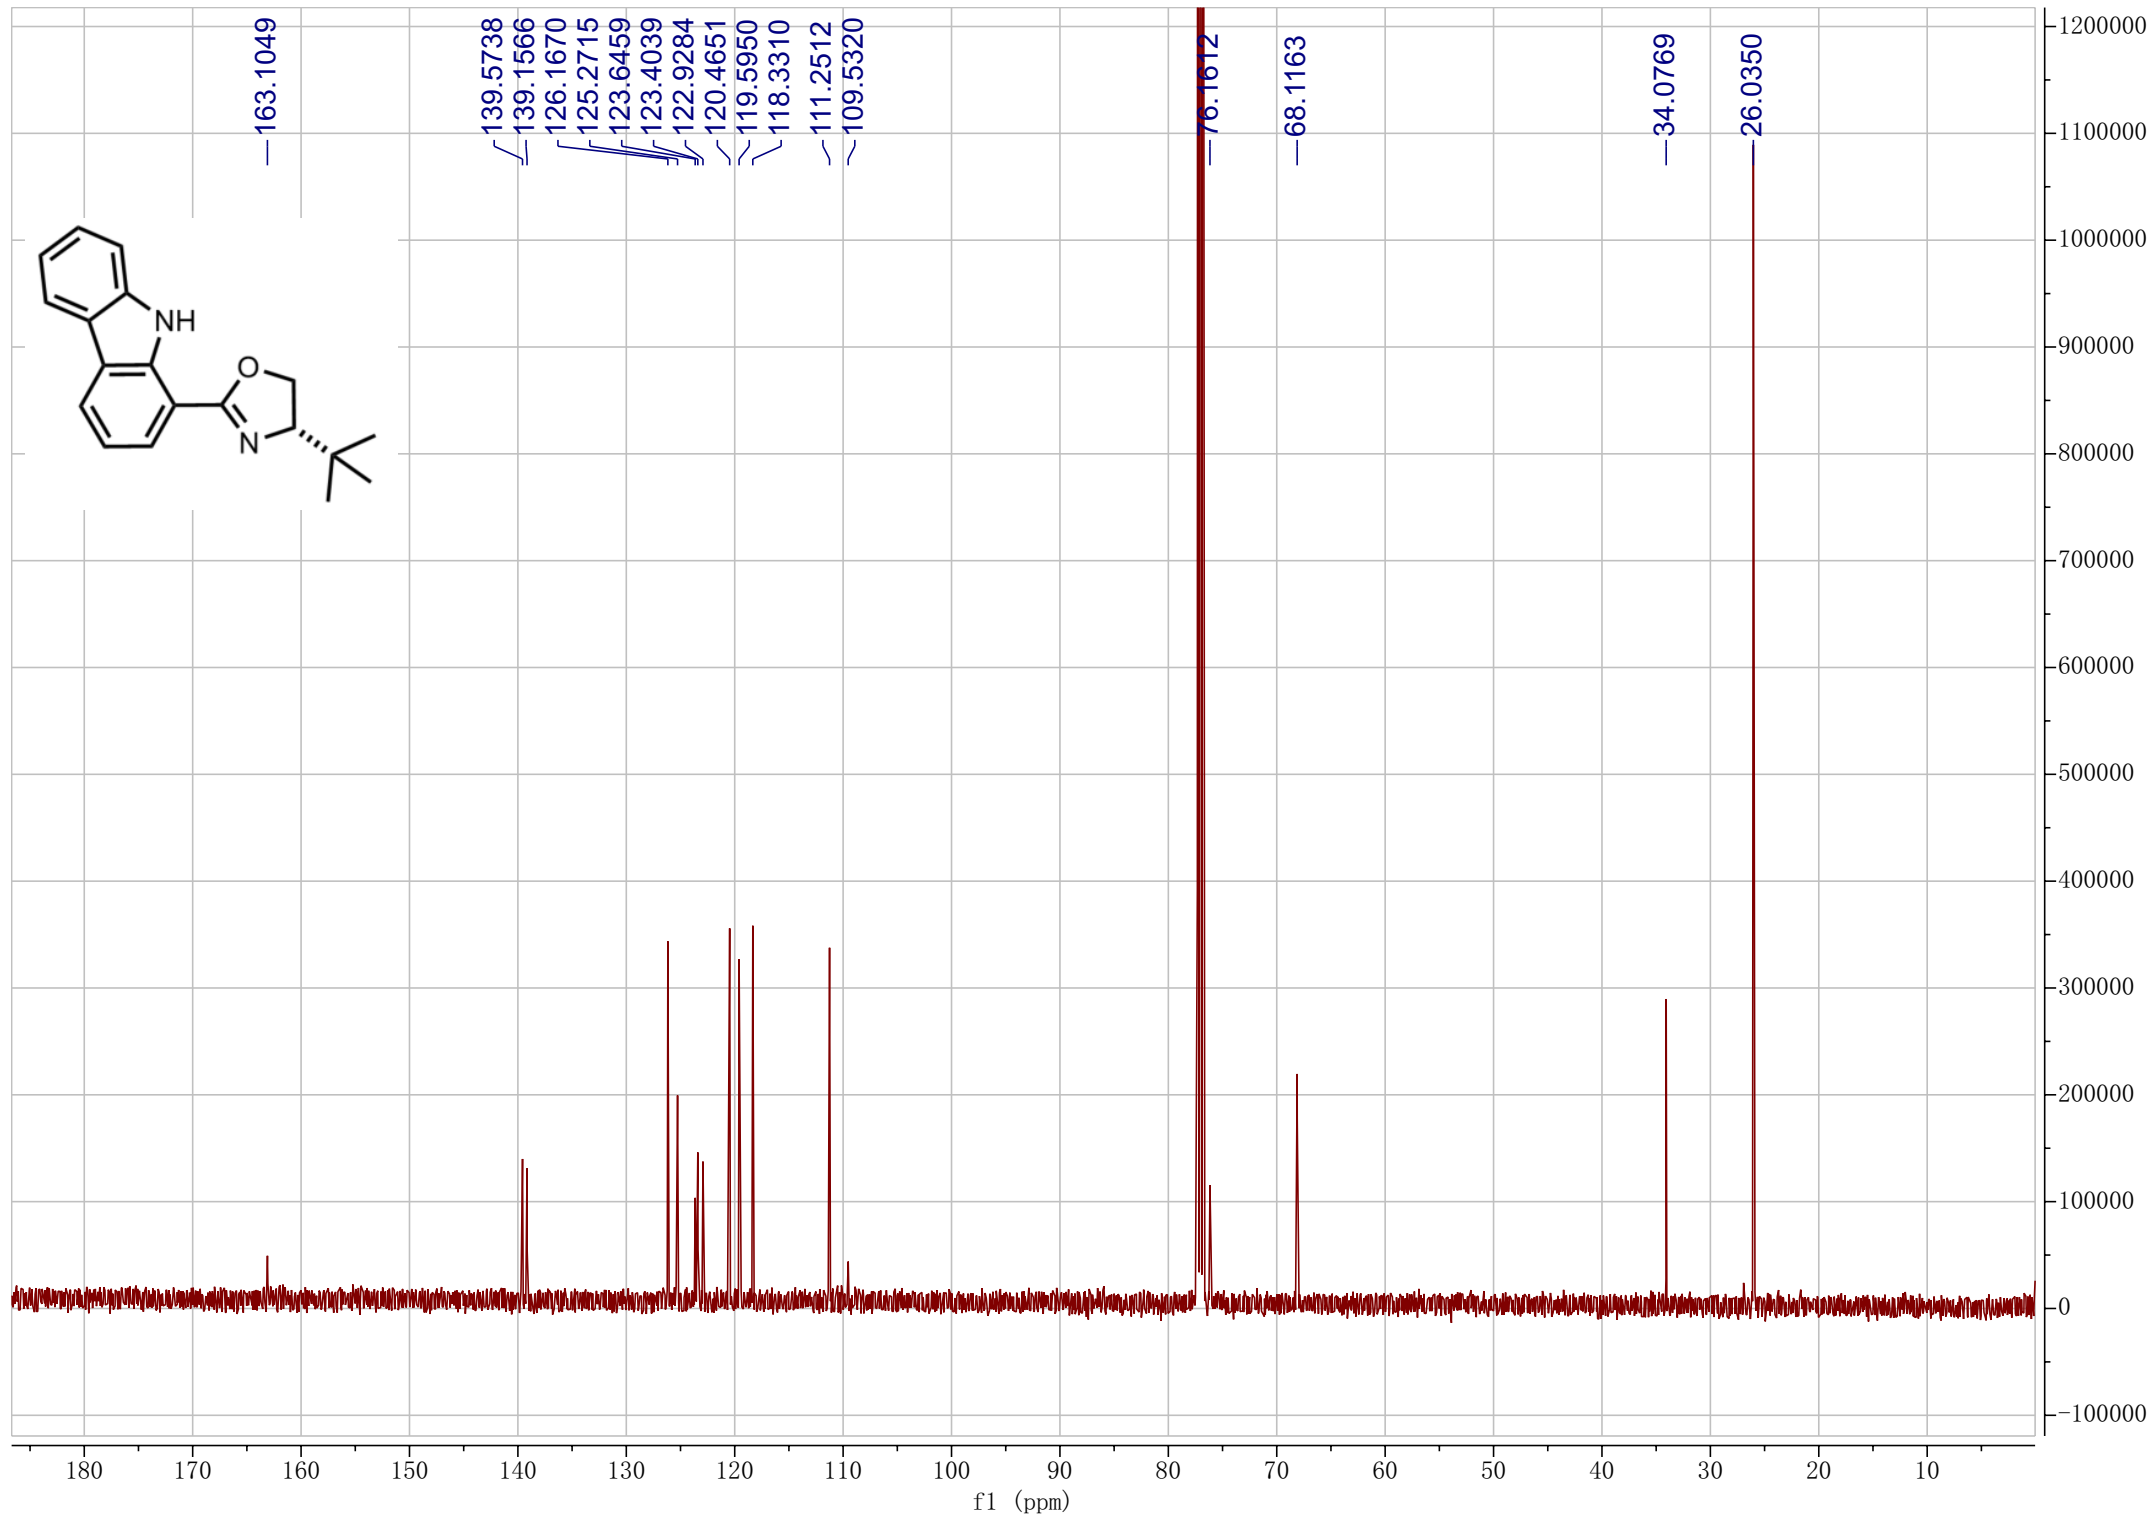

加成谱图/3aa  
L-42

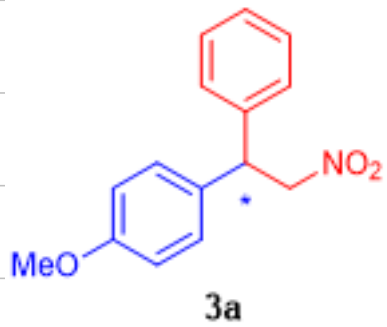

7.3458  
7.3423  
7.3381  
7.3301  
7.3250  
7.3213  
7.3101  
7.3056  
7.2597  
7.2359  
7.2317  
7.2188  
7.2139  
7.1716  
7.1636  
7.1584  
7.1473  
7.1418  
7.1338  
6.8731  
6.8650  
6.8597  
6.8487  
6.8432  
6.8351

4.9632  
4.9574  
4.9399  
4.8761  
4.8560  
4.8356

3.7752

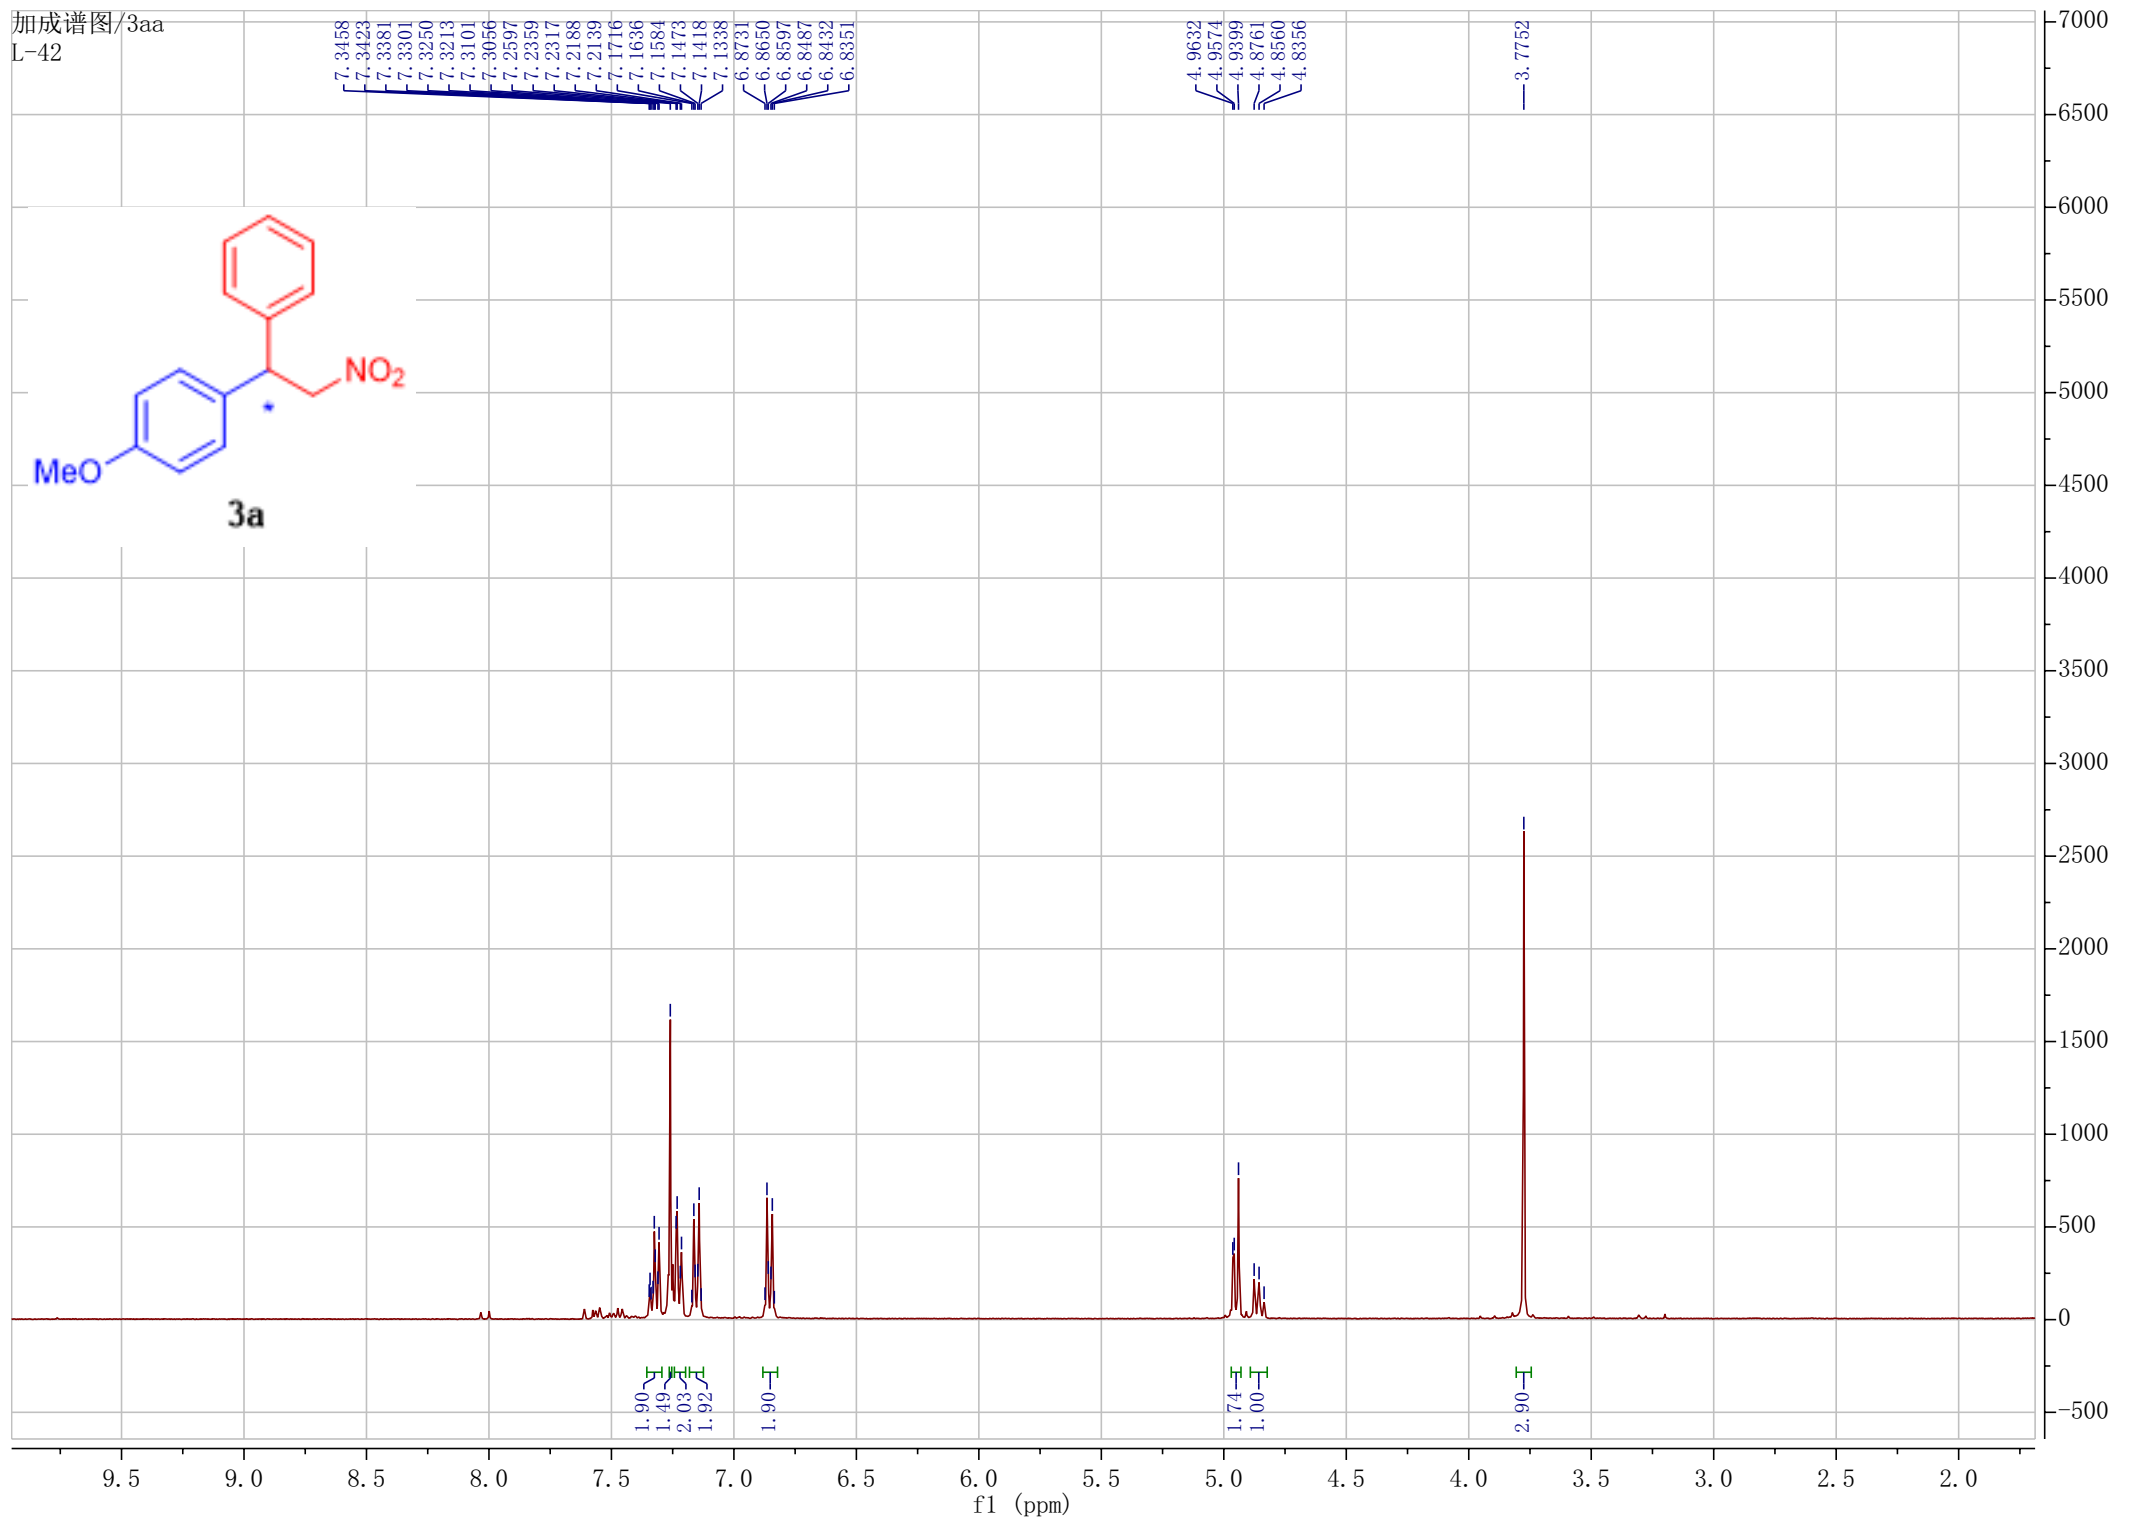

3ab/3ab HNMR  
LC3

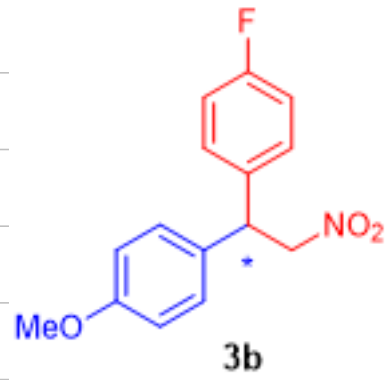

7.2364  
7.2312  
7.2233  
7.2190  
7.2145  
7.2069  
7.2016  
7.1603  
7.1550  
7.1441  
7.1386  
7.0589  
7.0534  
7.0426  
7.0375  
7.0318  
7.0210  
7.0158  
6.8957  
6.8902  
6.8792  
6.8739

4.9561  
4.9520  
4.9339  
4.8876  
4.8703  
4.8644  
4.8471

3.8037

2.04  
2.01  
1.97  
1.93

1.94  
1.00

3.04

10.0 9.5 9.0 8.5 8.0 7.5 7.0 6.5 6.0 5.5 5.0 4.5 4.0 3.5 3.0 2.5 2.0

f1 (ppm)

8500  
8000  
7500  
7000  
6500  
6000  
5500  
5000  
4500  
4000  
3500  
3000  
2500  
2000  
1500  
1000  
500  
0  
-500

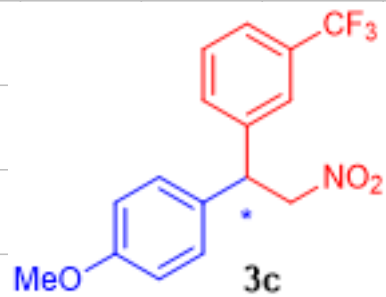

7.5668  
7.5620  
7.5577  
7.5503  
7.5476  
7.5450  
7.5427  
7.5392  
7.5064  
7.5032  
7.4858  
7.4683  
7.4638  
7.4592  
7.4491  
7.4443  
7.4398  
7.4322  
7.4170  
7.4187  
7.4177  
7.41523  
7.4144  
6.9188  
6.9110  
6.9055  
6.8943  
6.8891  
6.8810

5.0162  
5.0094  
4.9978  
4.9876  
4.9820  
4.9695  
4.9618  
4.9537  
4.9460  
4.9399  
4.9244

3.8087

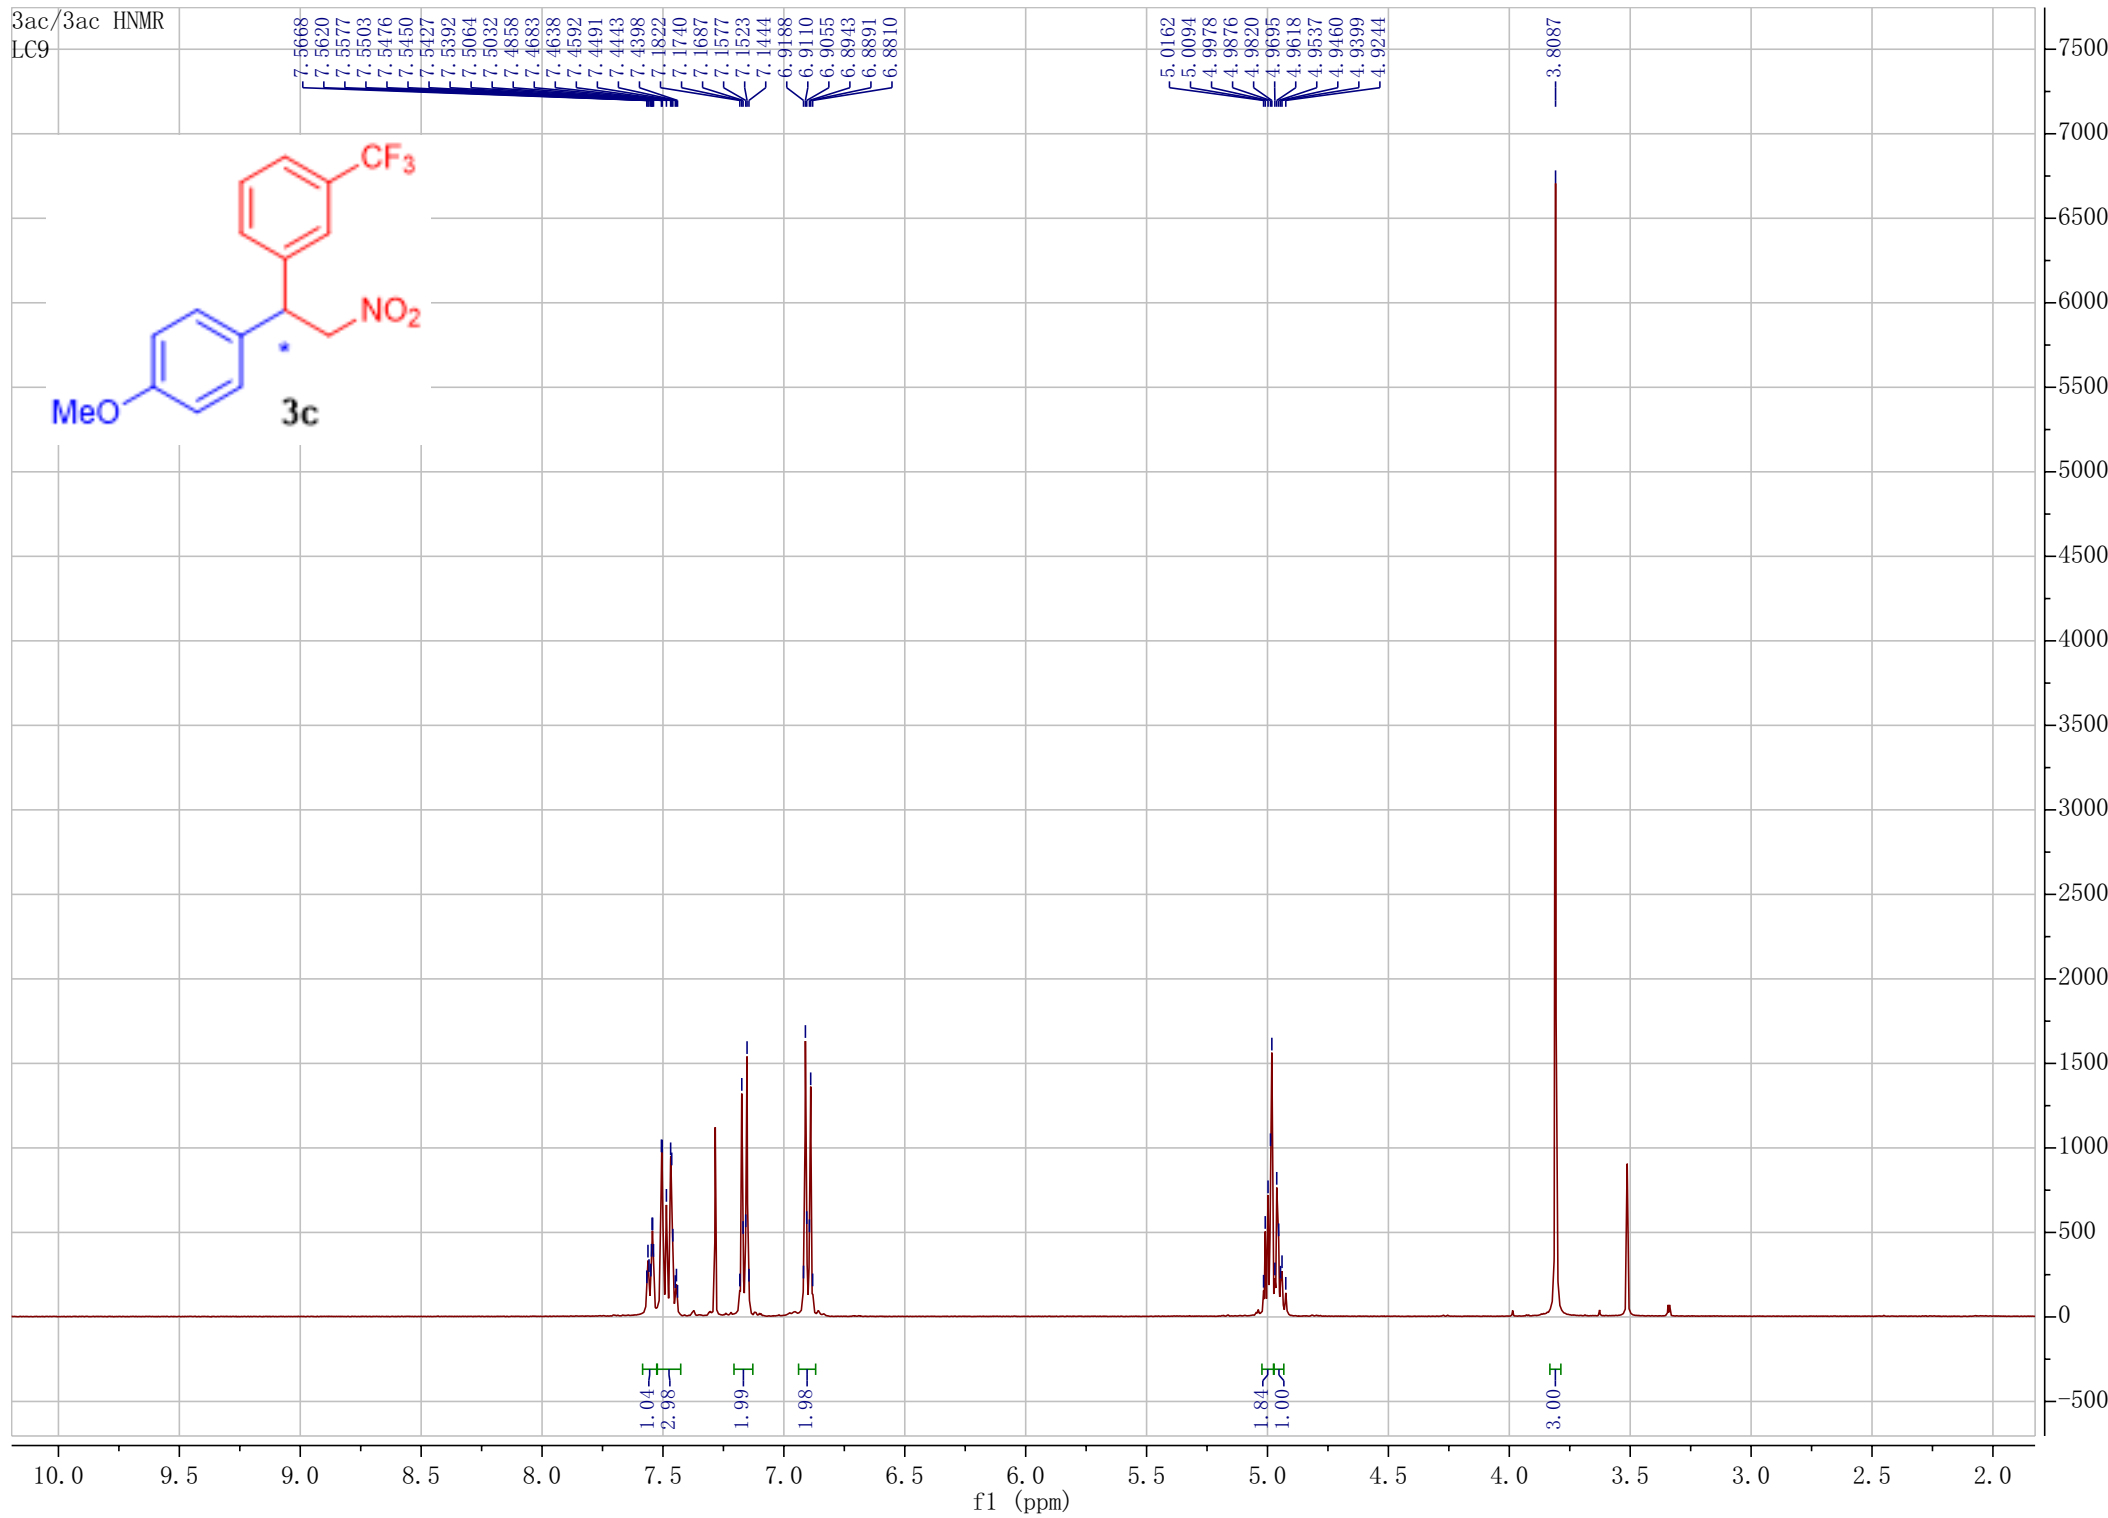

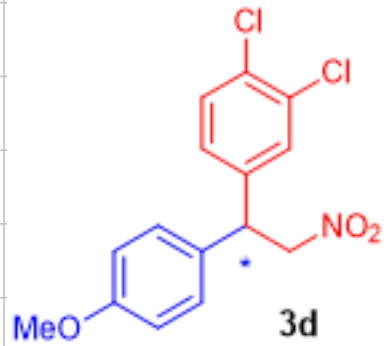

7.4123  
7.3916  
7.3115  
7.3061  
7.1248  
7.1195  
7.1086  
7.1031  
7.0945  
7.0888  
7.0735  
7.0680  
6.8858  
6.8805  
6.8693  
6.8639

4.9279  
4.9227  
4.9050  
4.8348  
4.8168  
4.8121  
4.7942

3.7893

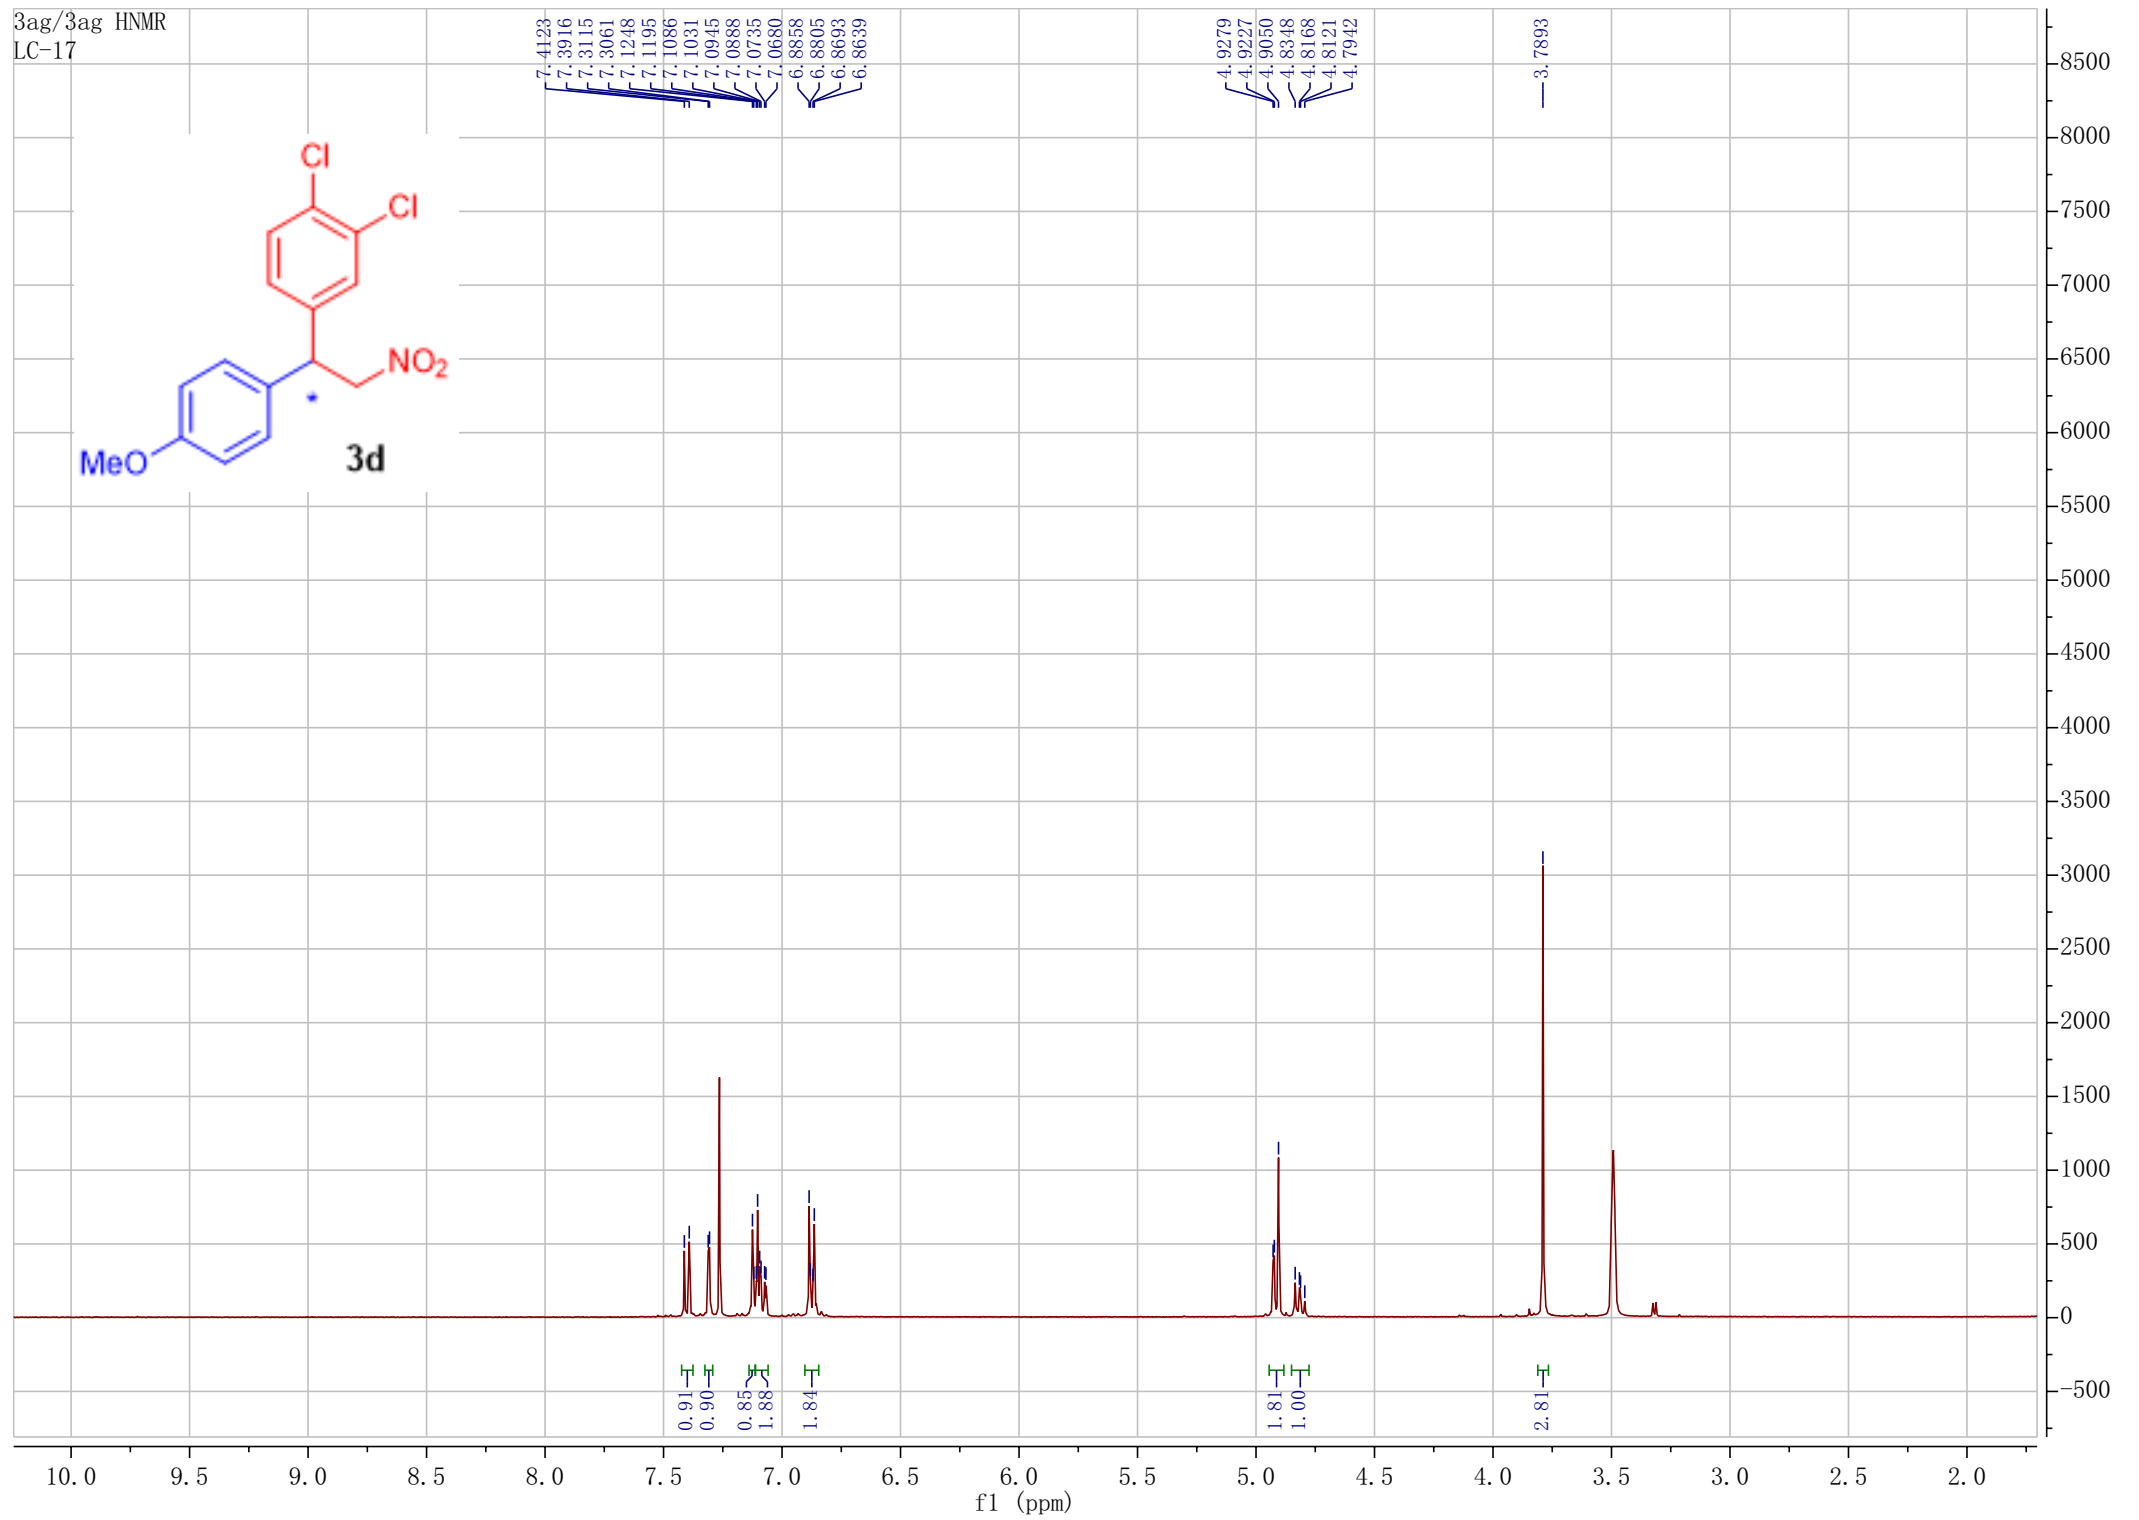

3ah/3ah HNMR  
LC5

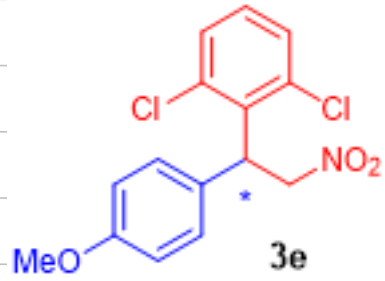

7.3373  
7.1974  
7.1773  
7.1573  
7.1273  
7.1252  
7.1206  
7.1107  
7.1087  
7.1050  
7.1027  
6.8587  
6.8507  
6.8454  
6.8340  
6.8285  
6.8206  
5.9704  
5.9518  
5.9331  
5.4504  
5.4318  
5.4173  
5.3986  
5.2926  
5.2740  
5.2595  
5.2409

3.7817

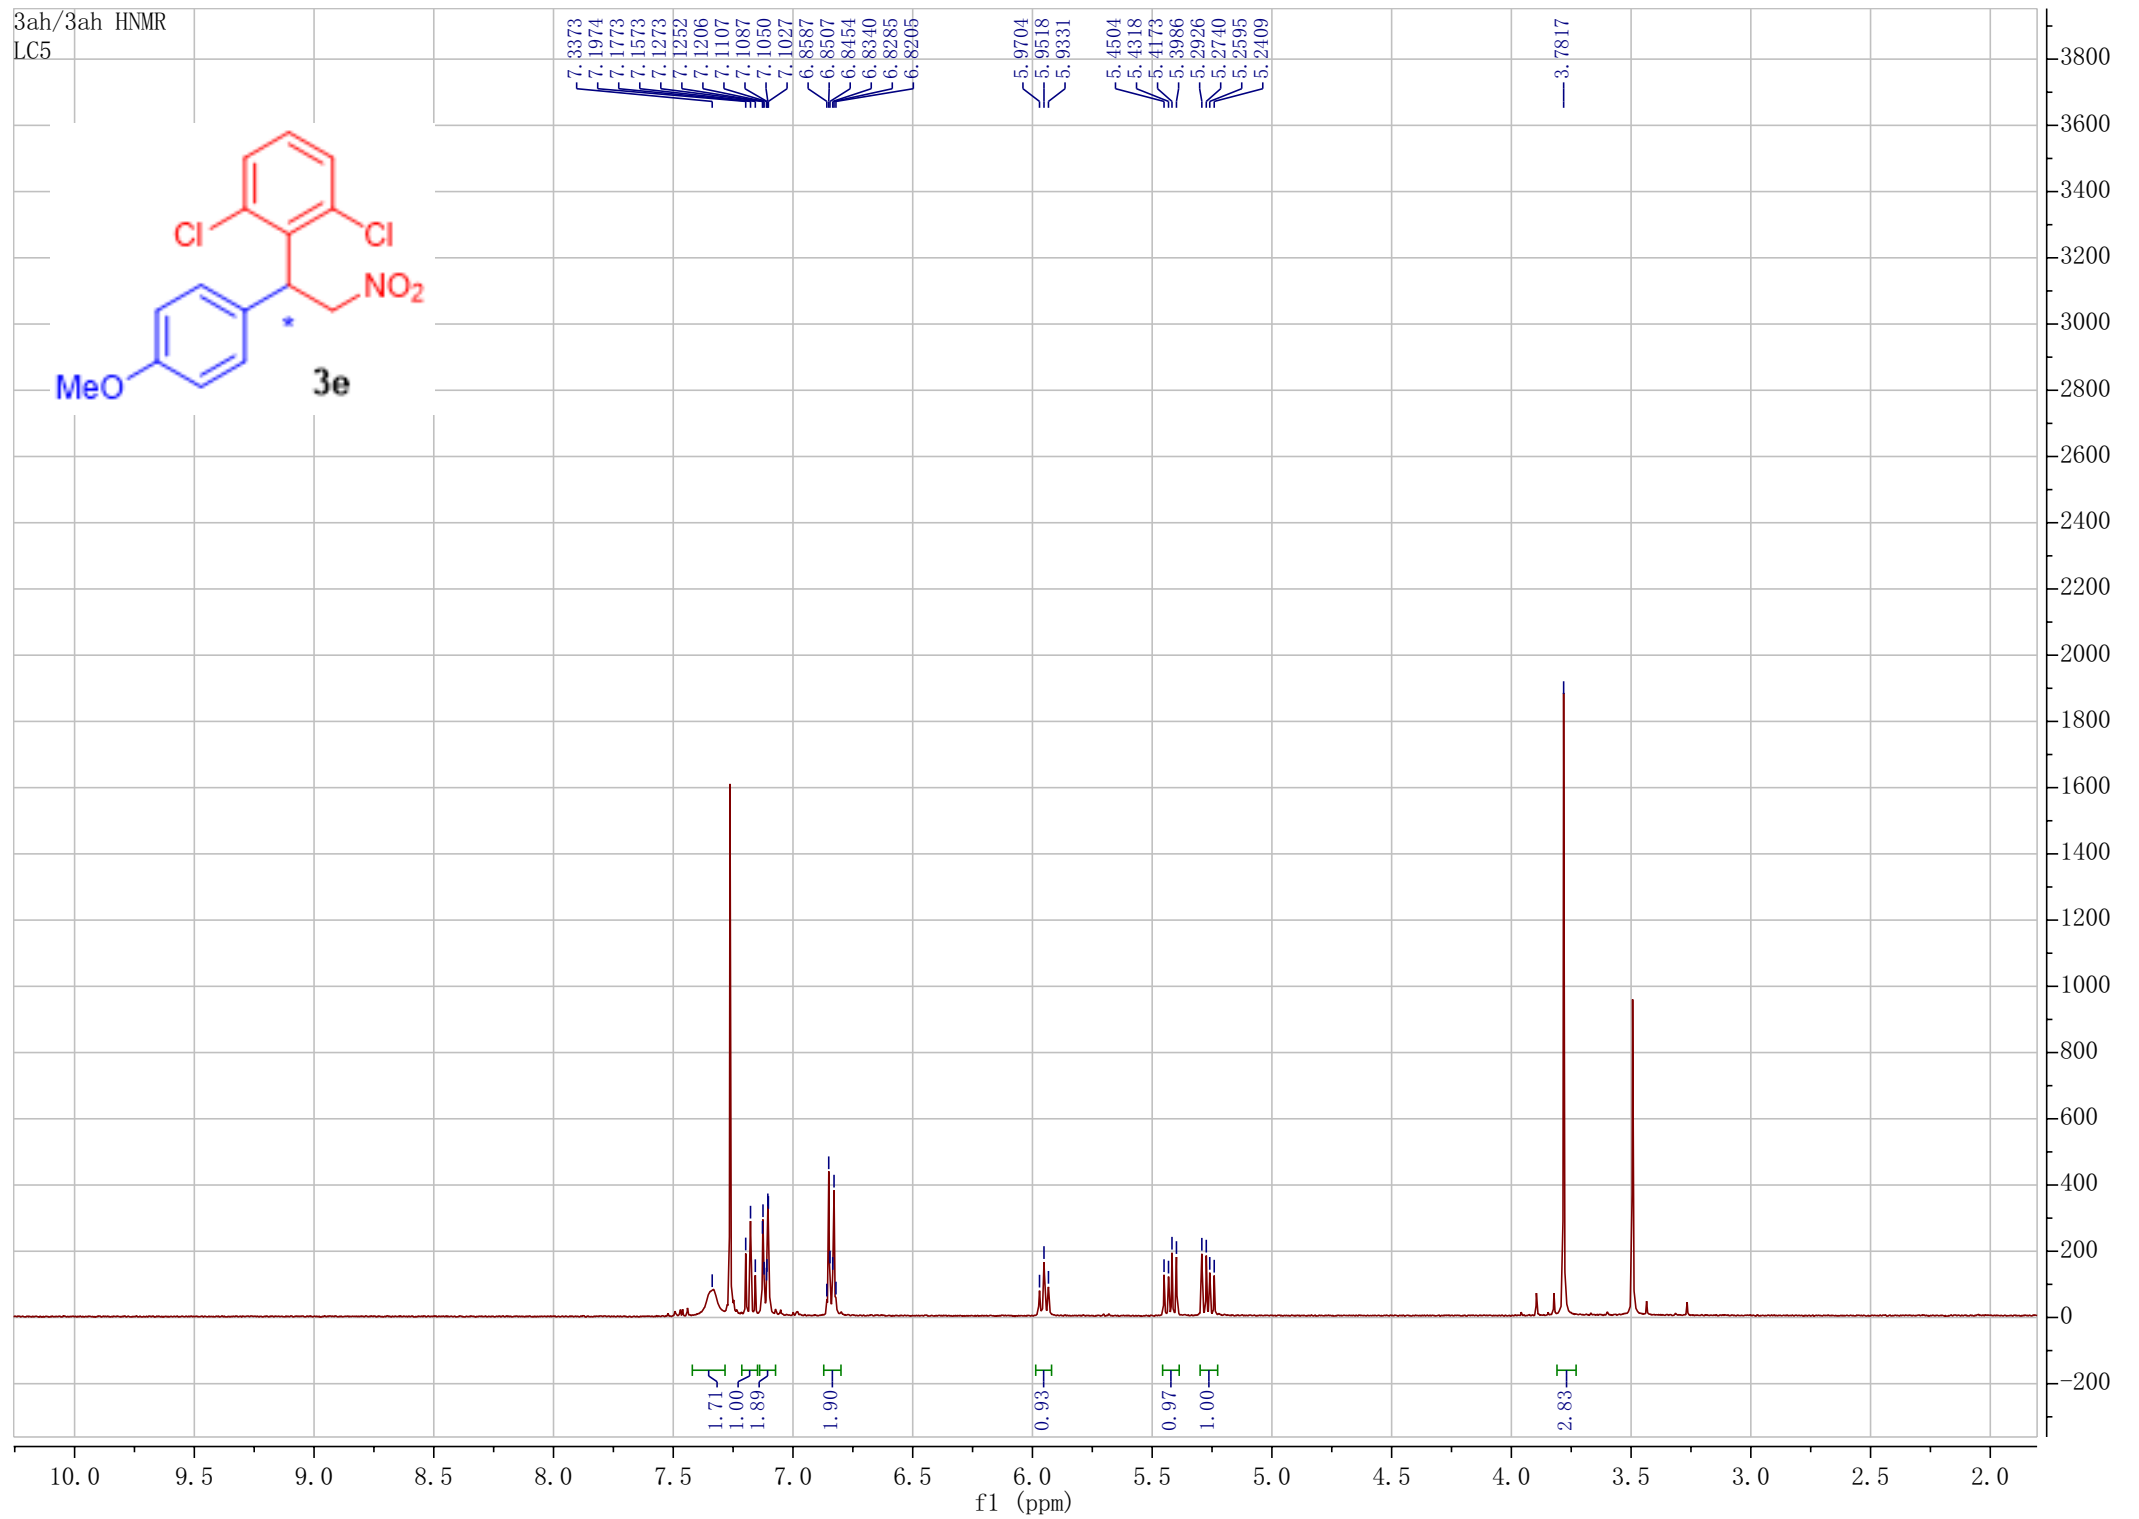

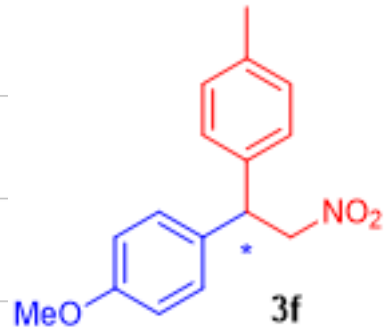

7.1561  
7.1509  
7.1437  
7.1399  
7.1344  
7.1219  
7.1154  
7.1081  
7.0963  
7.0937

6.8577  
6.8523  
6.8412  
6.8360

4.9413  
4.9373  
4.9189  
4.8373  
4.8170  
4.7965

3.7731

2.3087

5.73

1.95

1.87

1.00

2.84

2.92

10.0 9.5 9.0 8.5 8.0 7.5 7.0 6.5 6.0 5.5 5.0 4.5 4.0 3.5 3.0 2.5 2.0

f1 (ppm)

6000  
5500  
5000  
4500  
4000  
3500  
3000  
2500  
2000  
1500  
1000  
500  
0  
-500

3ai/3ai HNMR  
LC11

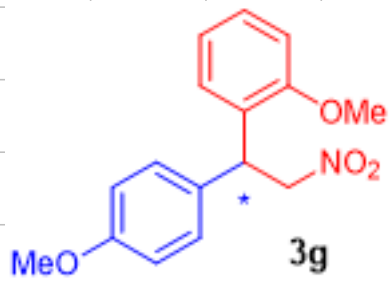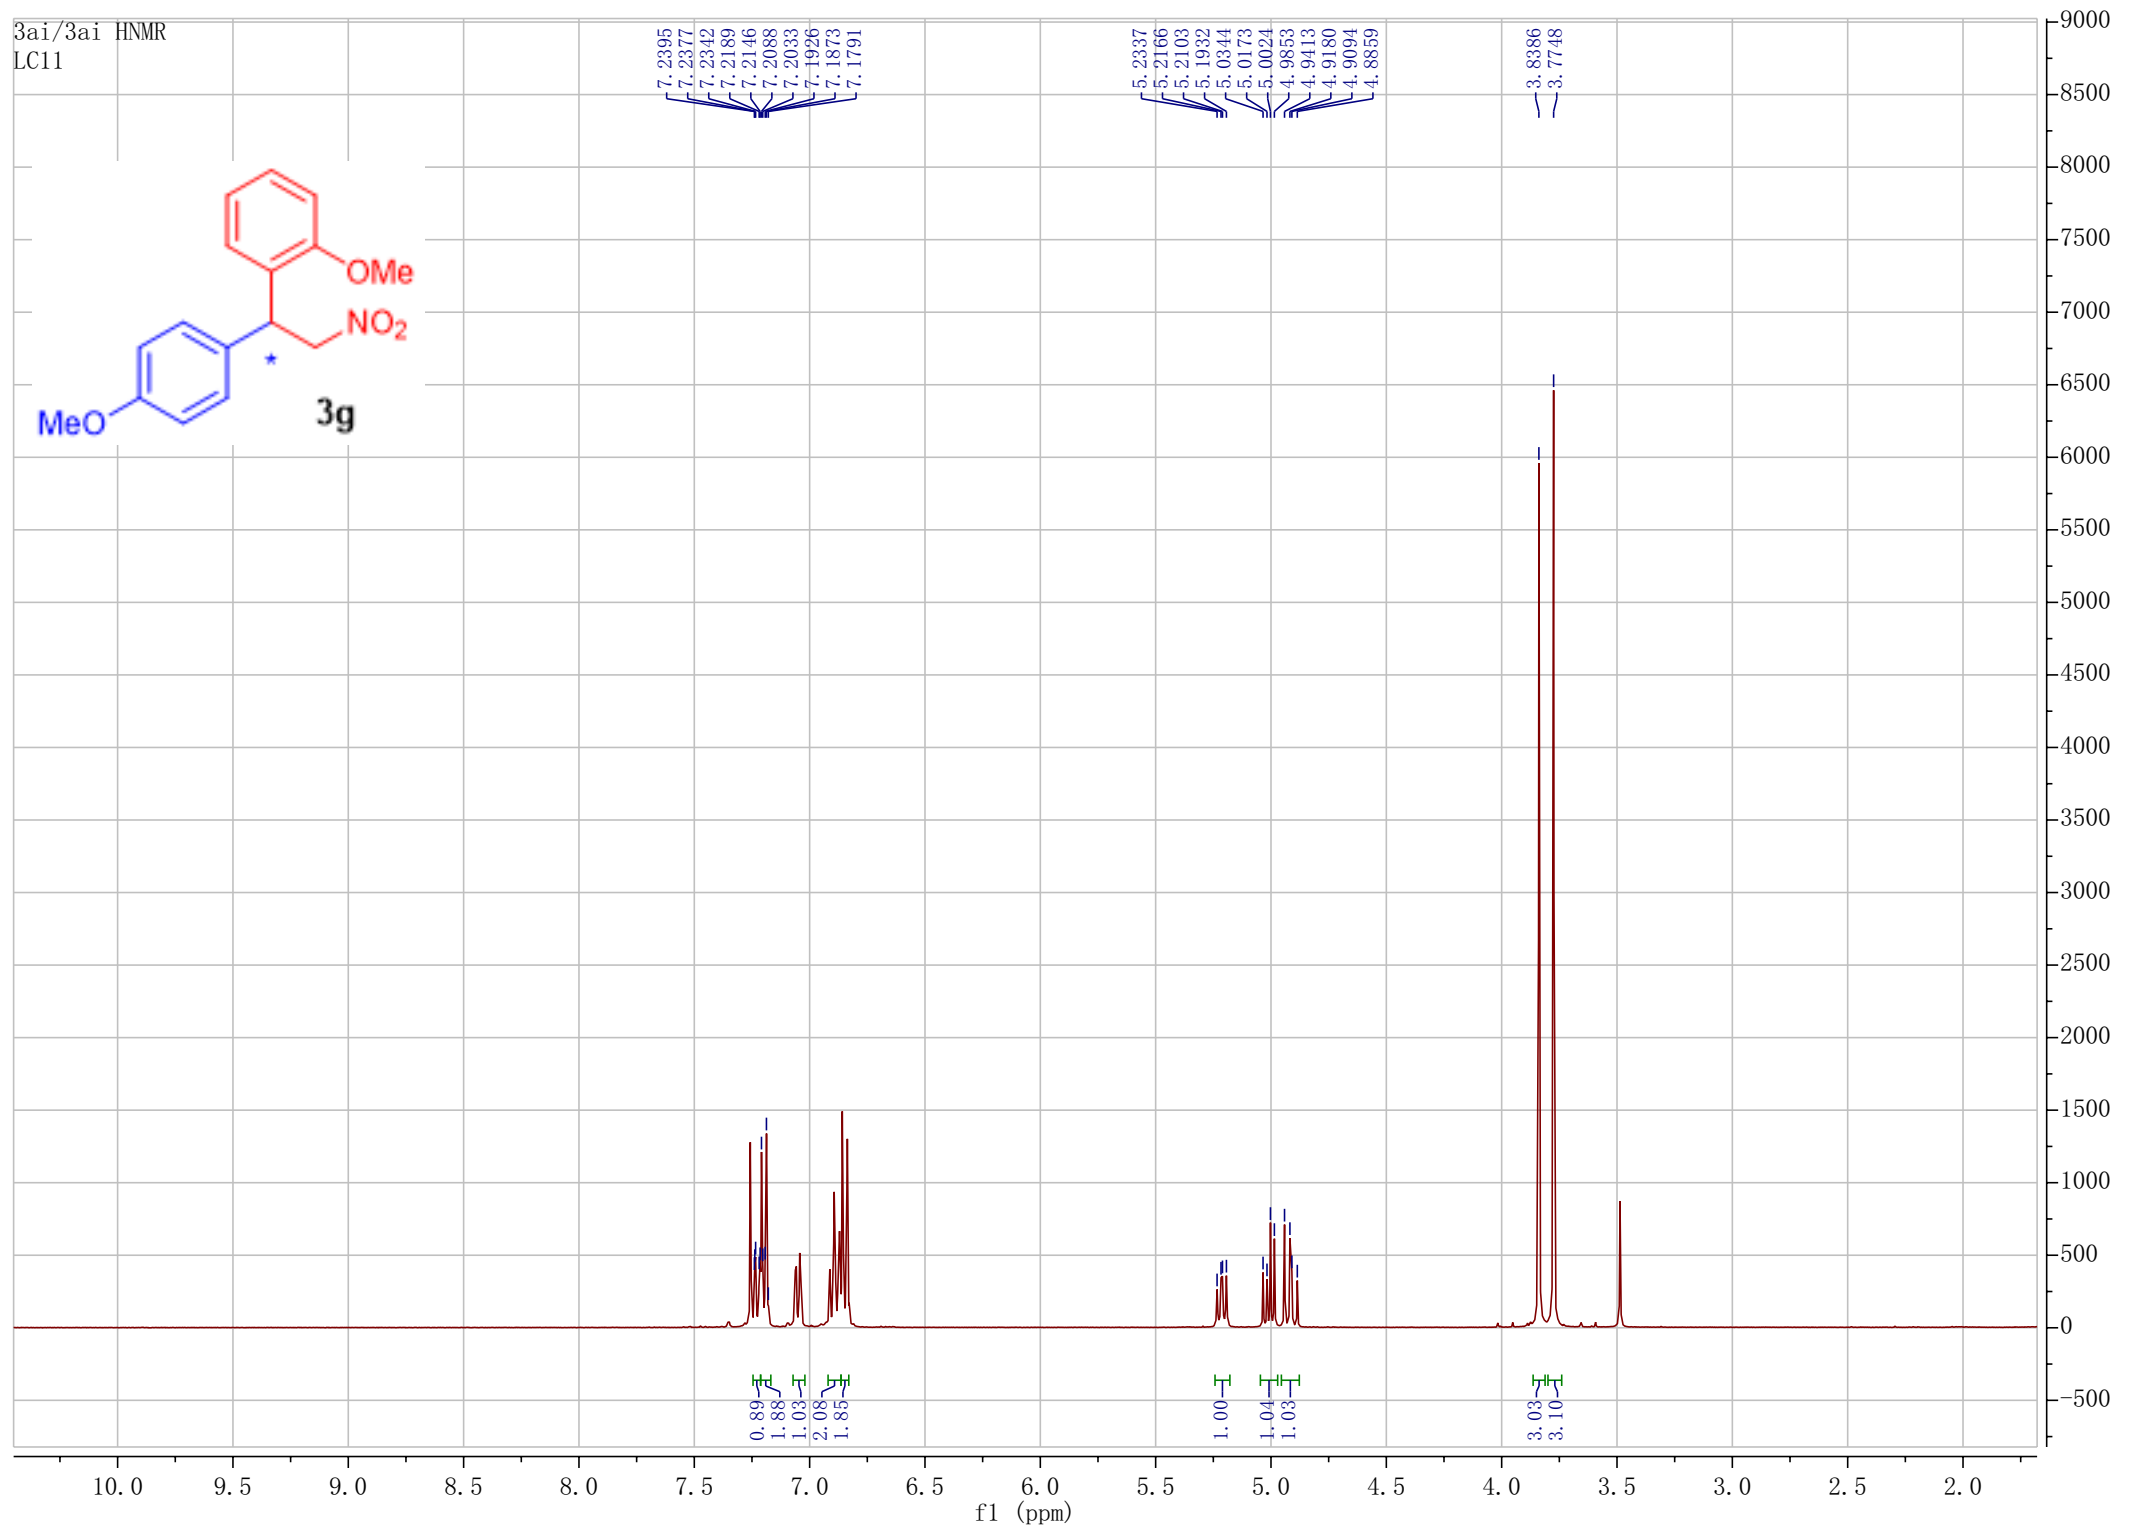



3ae/3ae-HNMR  
K45

7.2316  
7.2272  
7.2118  
7.2075  
7.1738  
7.1534  
7.1256  
7.1056  
7.0656  
7.0615  
7.0470  
7.0425  
6.9053  
6.8860  
6.8645

5.2520  
5.2343  
5.2293  
5.2116  
5.0357  
5.0184  
5.0035  
4.9862  
4.9592  
4.9362  
4.9270  
4.9040

3.8316

2.3058

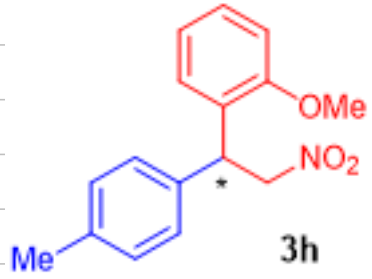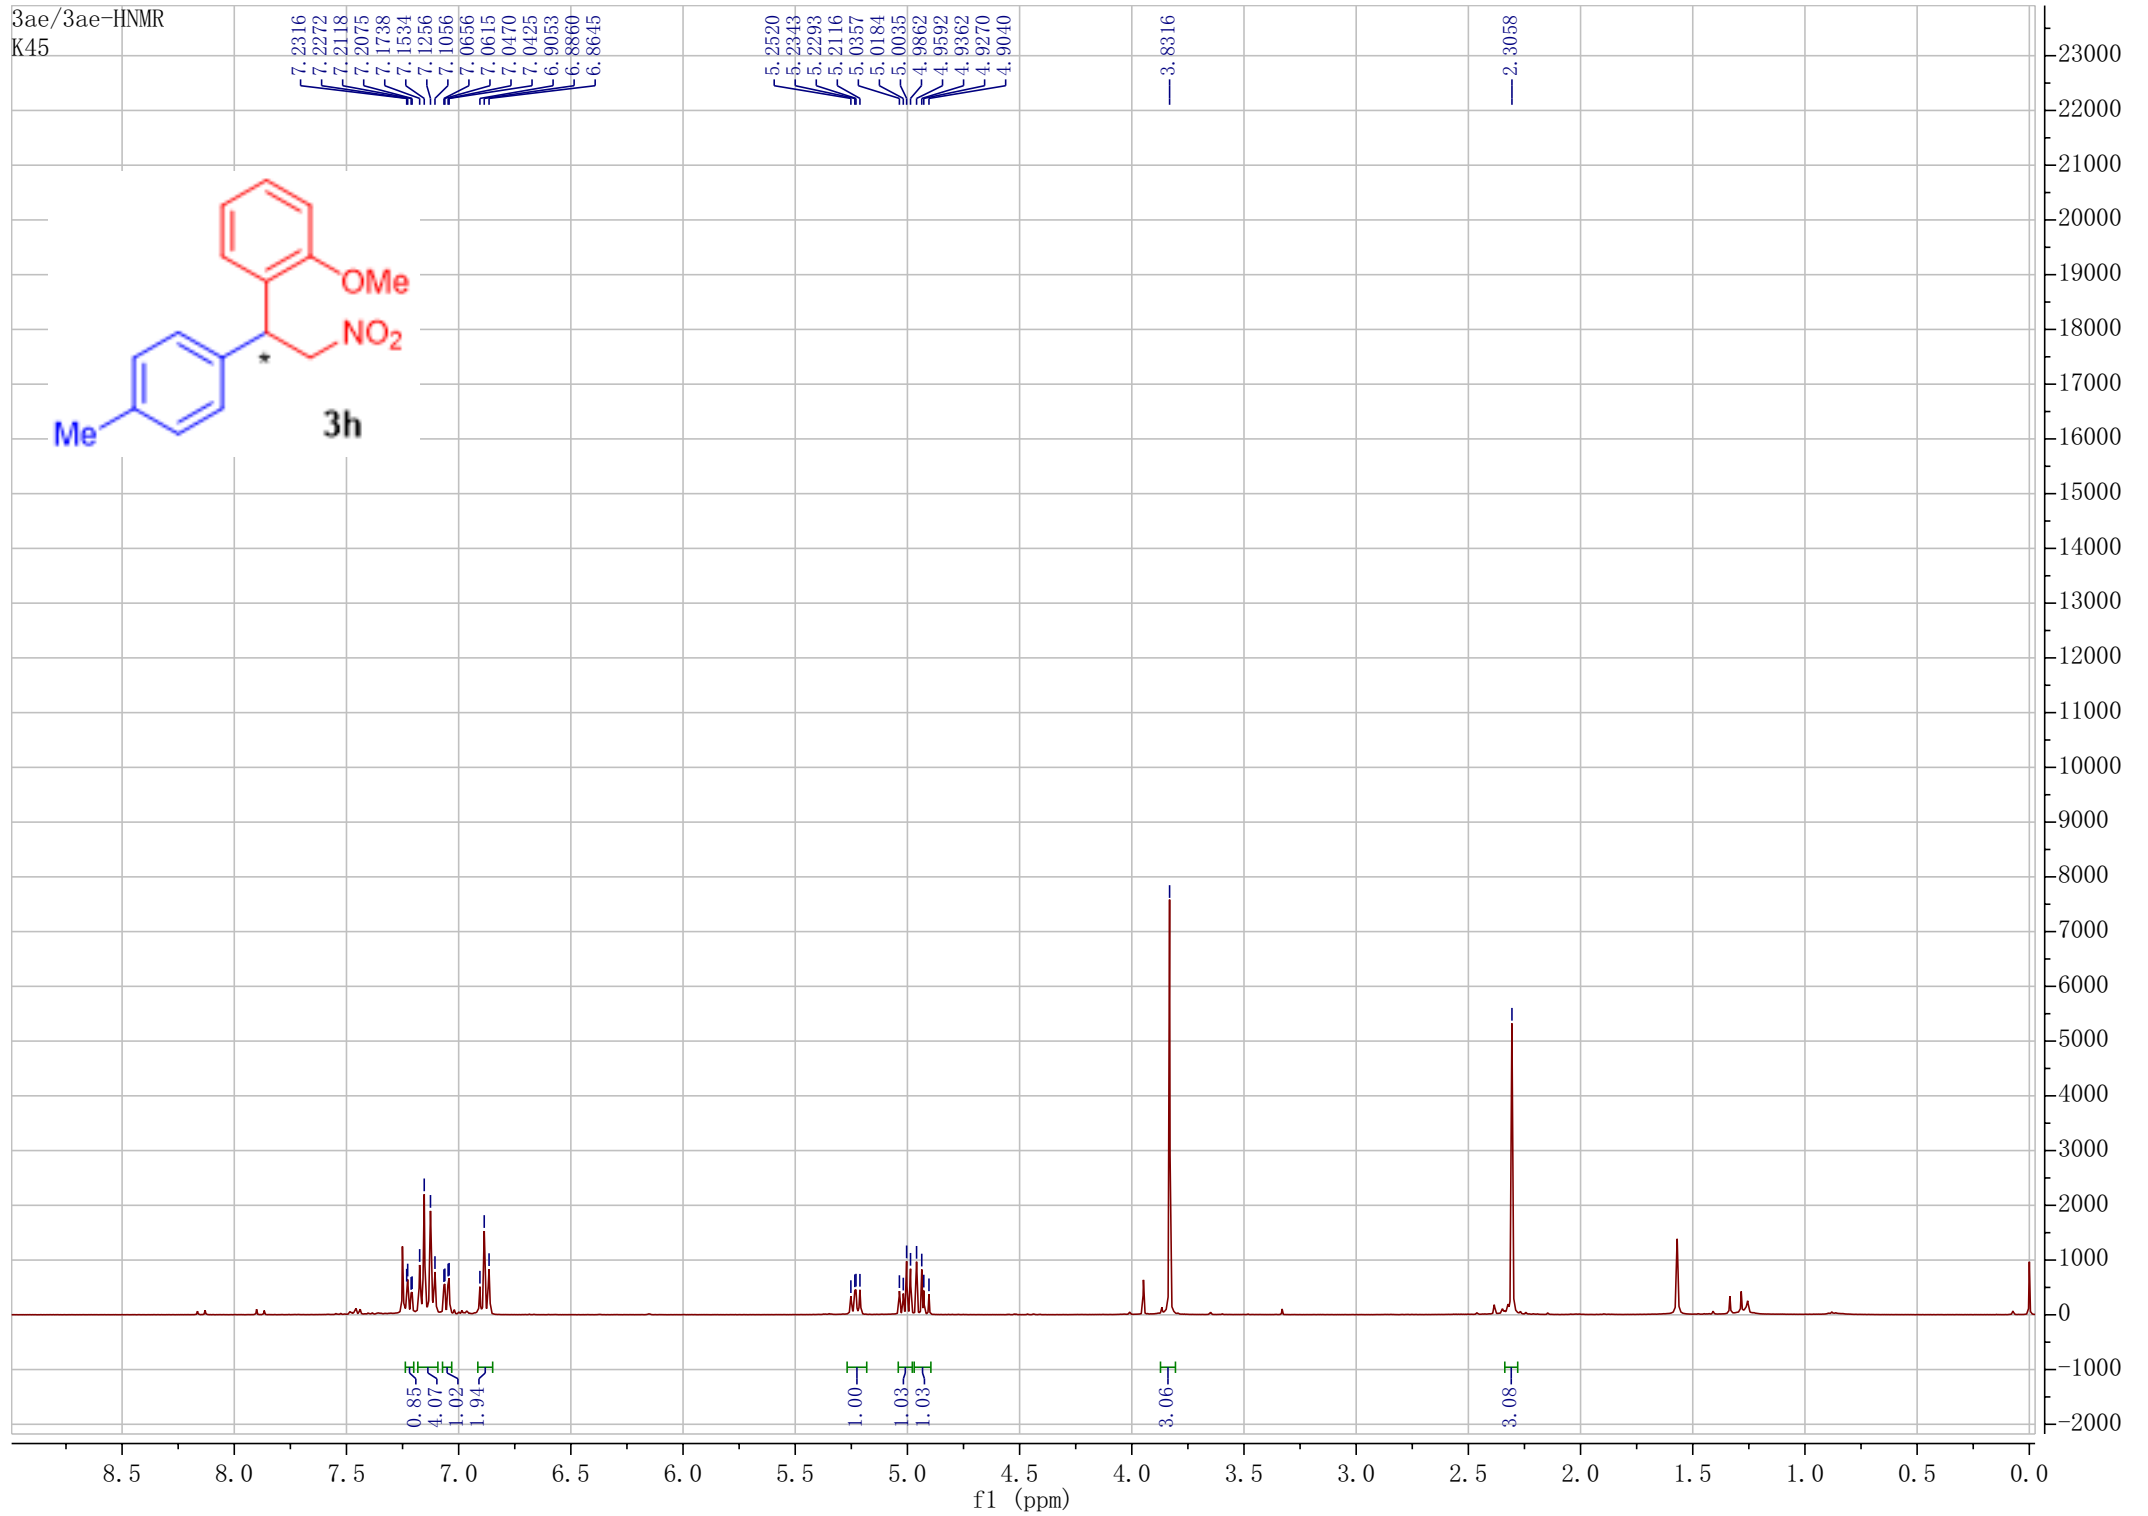

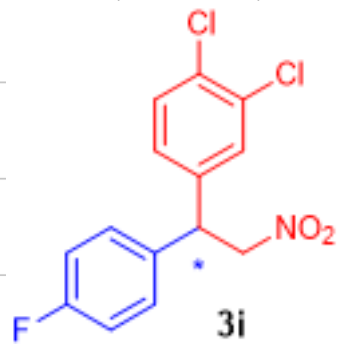

7.4251  
7.4088  
7.3003  
7.1944  
7.1878  
7.1786  
7.1691  
7.1627  
7.0782  
7.0634  
7.0521  
7.0468  
7.0346  
7.0293

4.9321  
4.9186  
4.9135  
4.8738  
4.8583  
4.8432

1.04  
0.98  
2.09  
3.17

2.01  
1.00

10.0 9.5 9.0 8.5 8.0 7.5 7.0 6.5 6.0 5.5 5.0 4.5 4.0 3.5 3.0

f1 (ppm)

13000000  
12000000  
11000000  
10000000  
9000000  
8000000  
7000000  
6000000  
5000000  
4000000  
3000000  
2000000  
1000000  
0  
-1000000

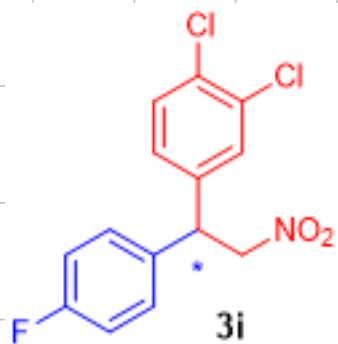

163.2859  
161.3135

139.1576  
133.3384  
132.1401  
131.0923  
129.6583  
129.2623  
129.1976  
126.8410

116.4180  
116.2459

78.6742

47.3160

190 180 170 160 150 140 130 120 110 100 90 80 70 60 50 40 30 20 10 0

f1 (ppm)

5500000  
5000000  
4500000  
4000000  
3500000  
3000000  
2500000  
2000000  
1500000  
1000000  
500000  
0  
-500000

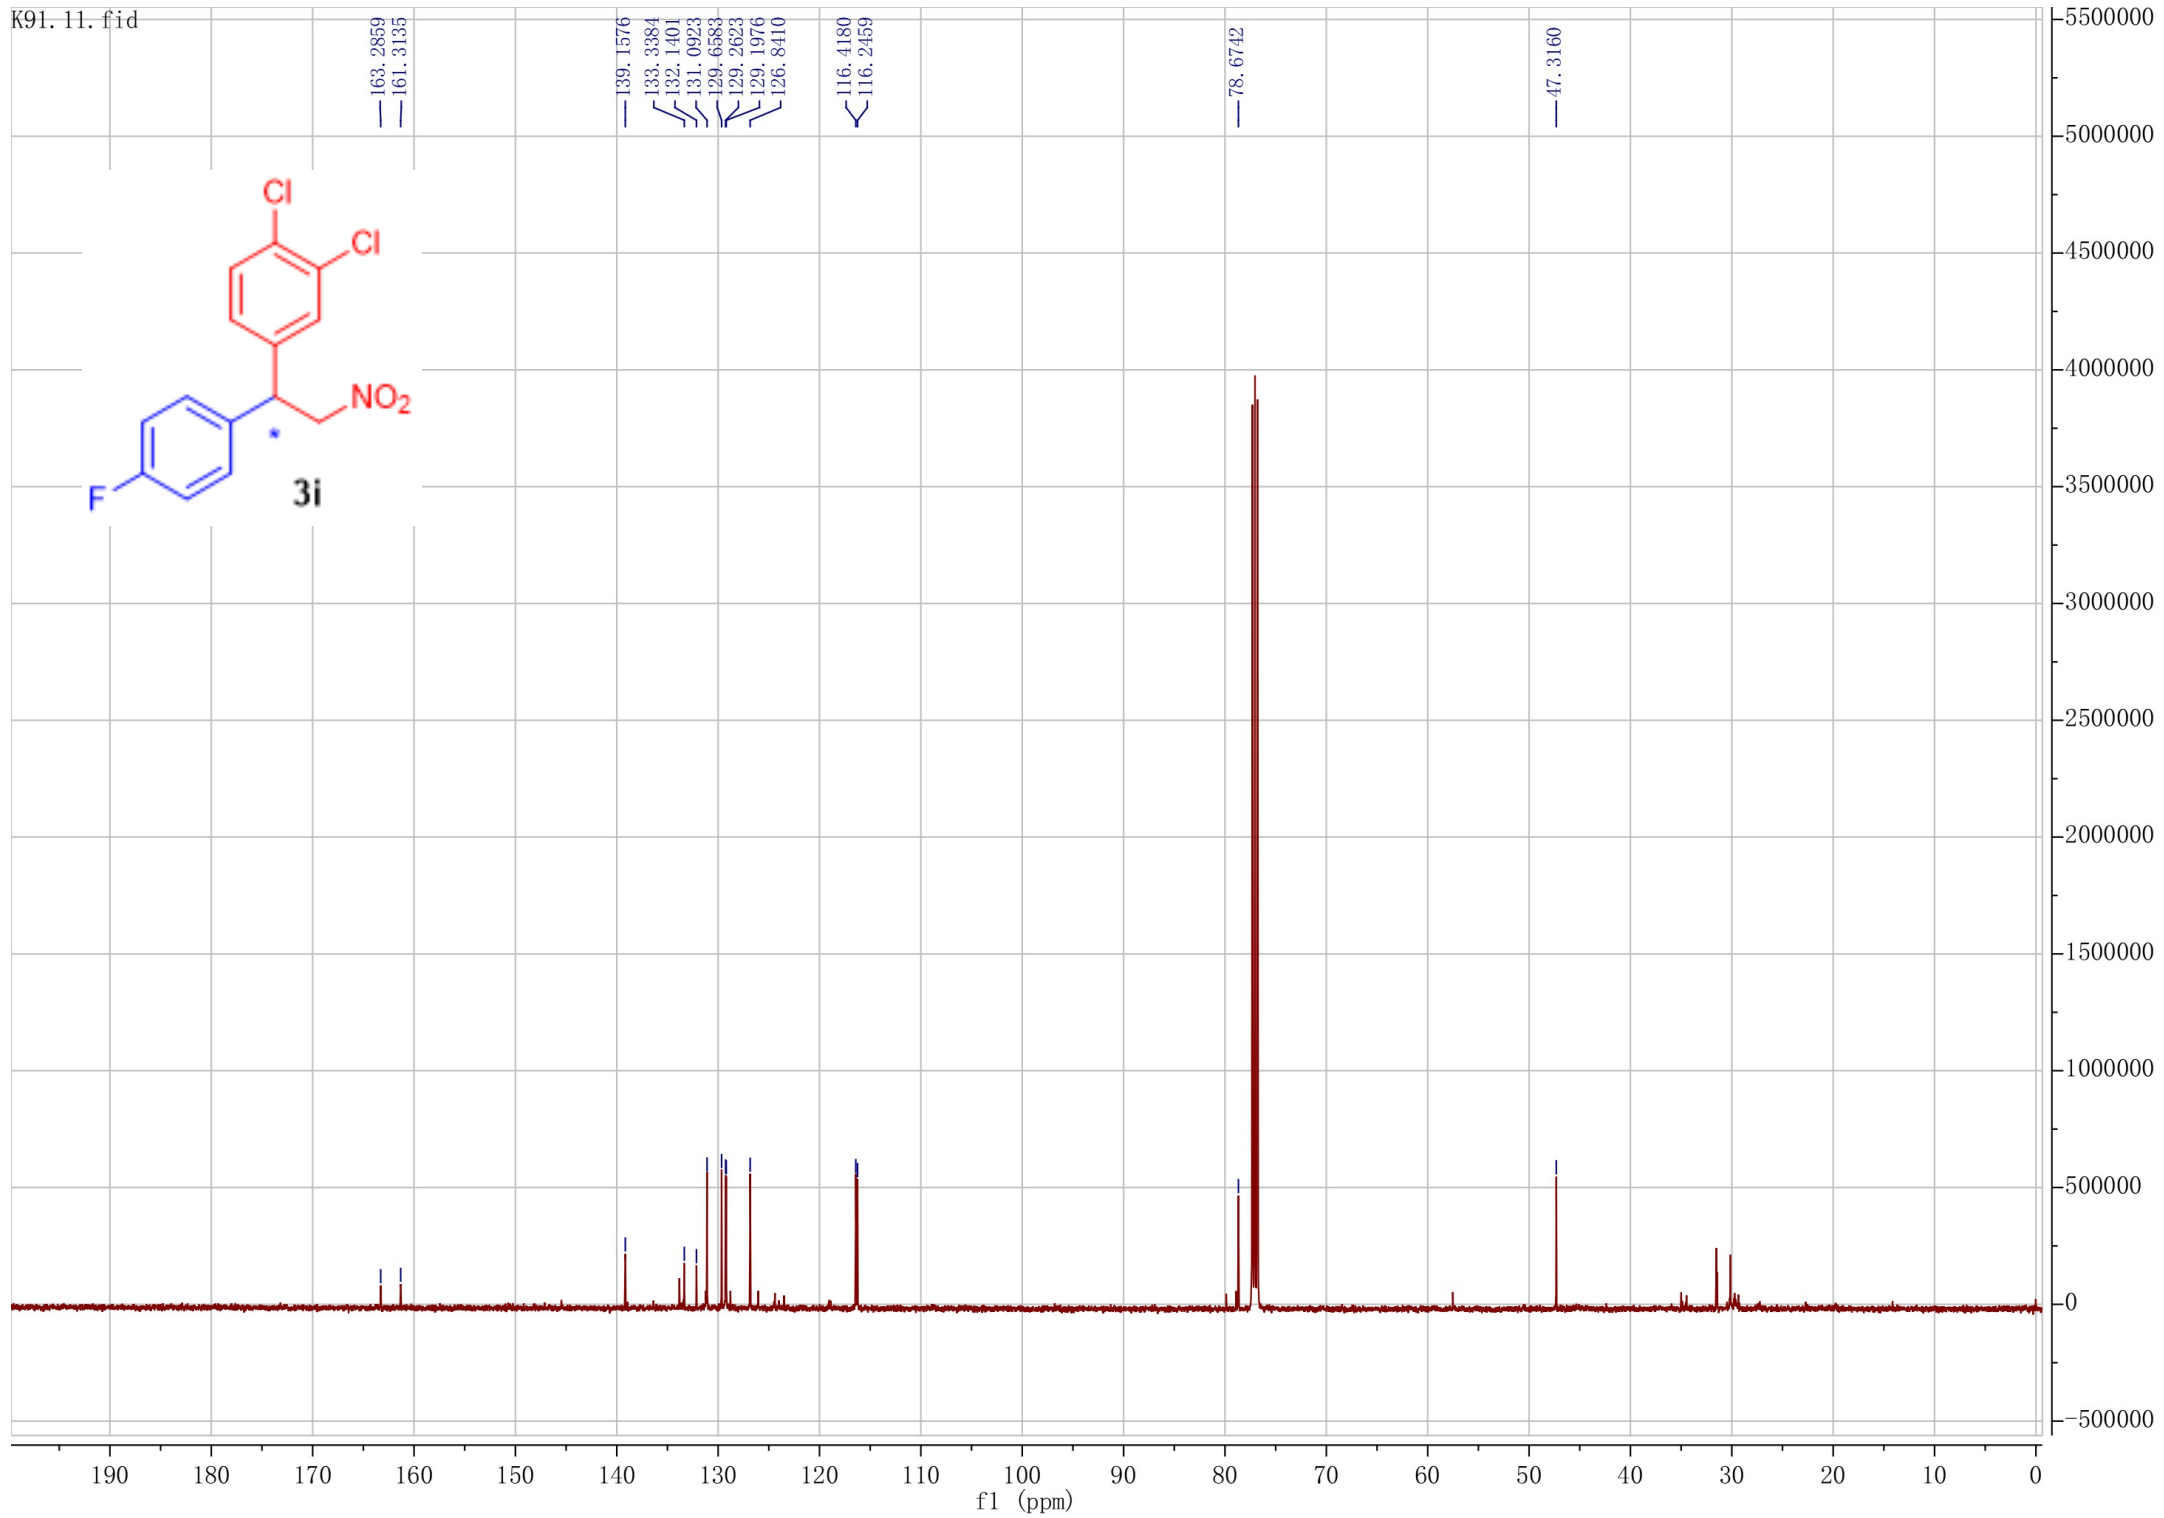

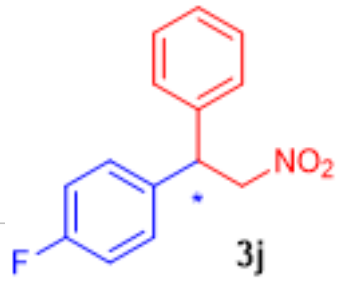

7.3414  
7.3237  
7.3045  
7.2731  
7.2550  
7.2345  
7.2141  
7.2028  
7.1933  
7.1810  
7.0285  
7.0214  
6.9999  
6.9830  
6.9784  
  
4.9538  
4.9513  
4.9470  
4.9306  
4.9011  
4.8849  
4.8786  
4.8619

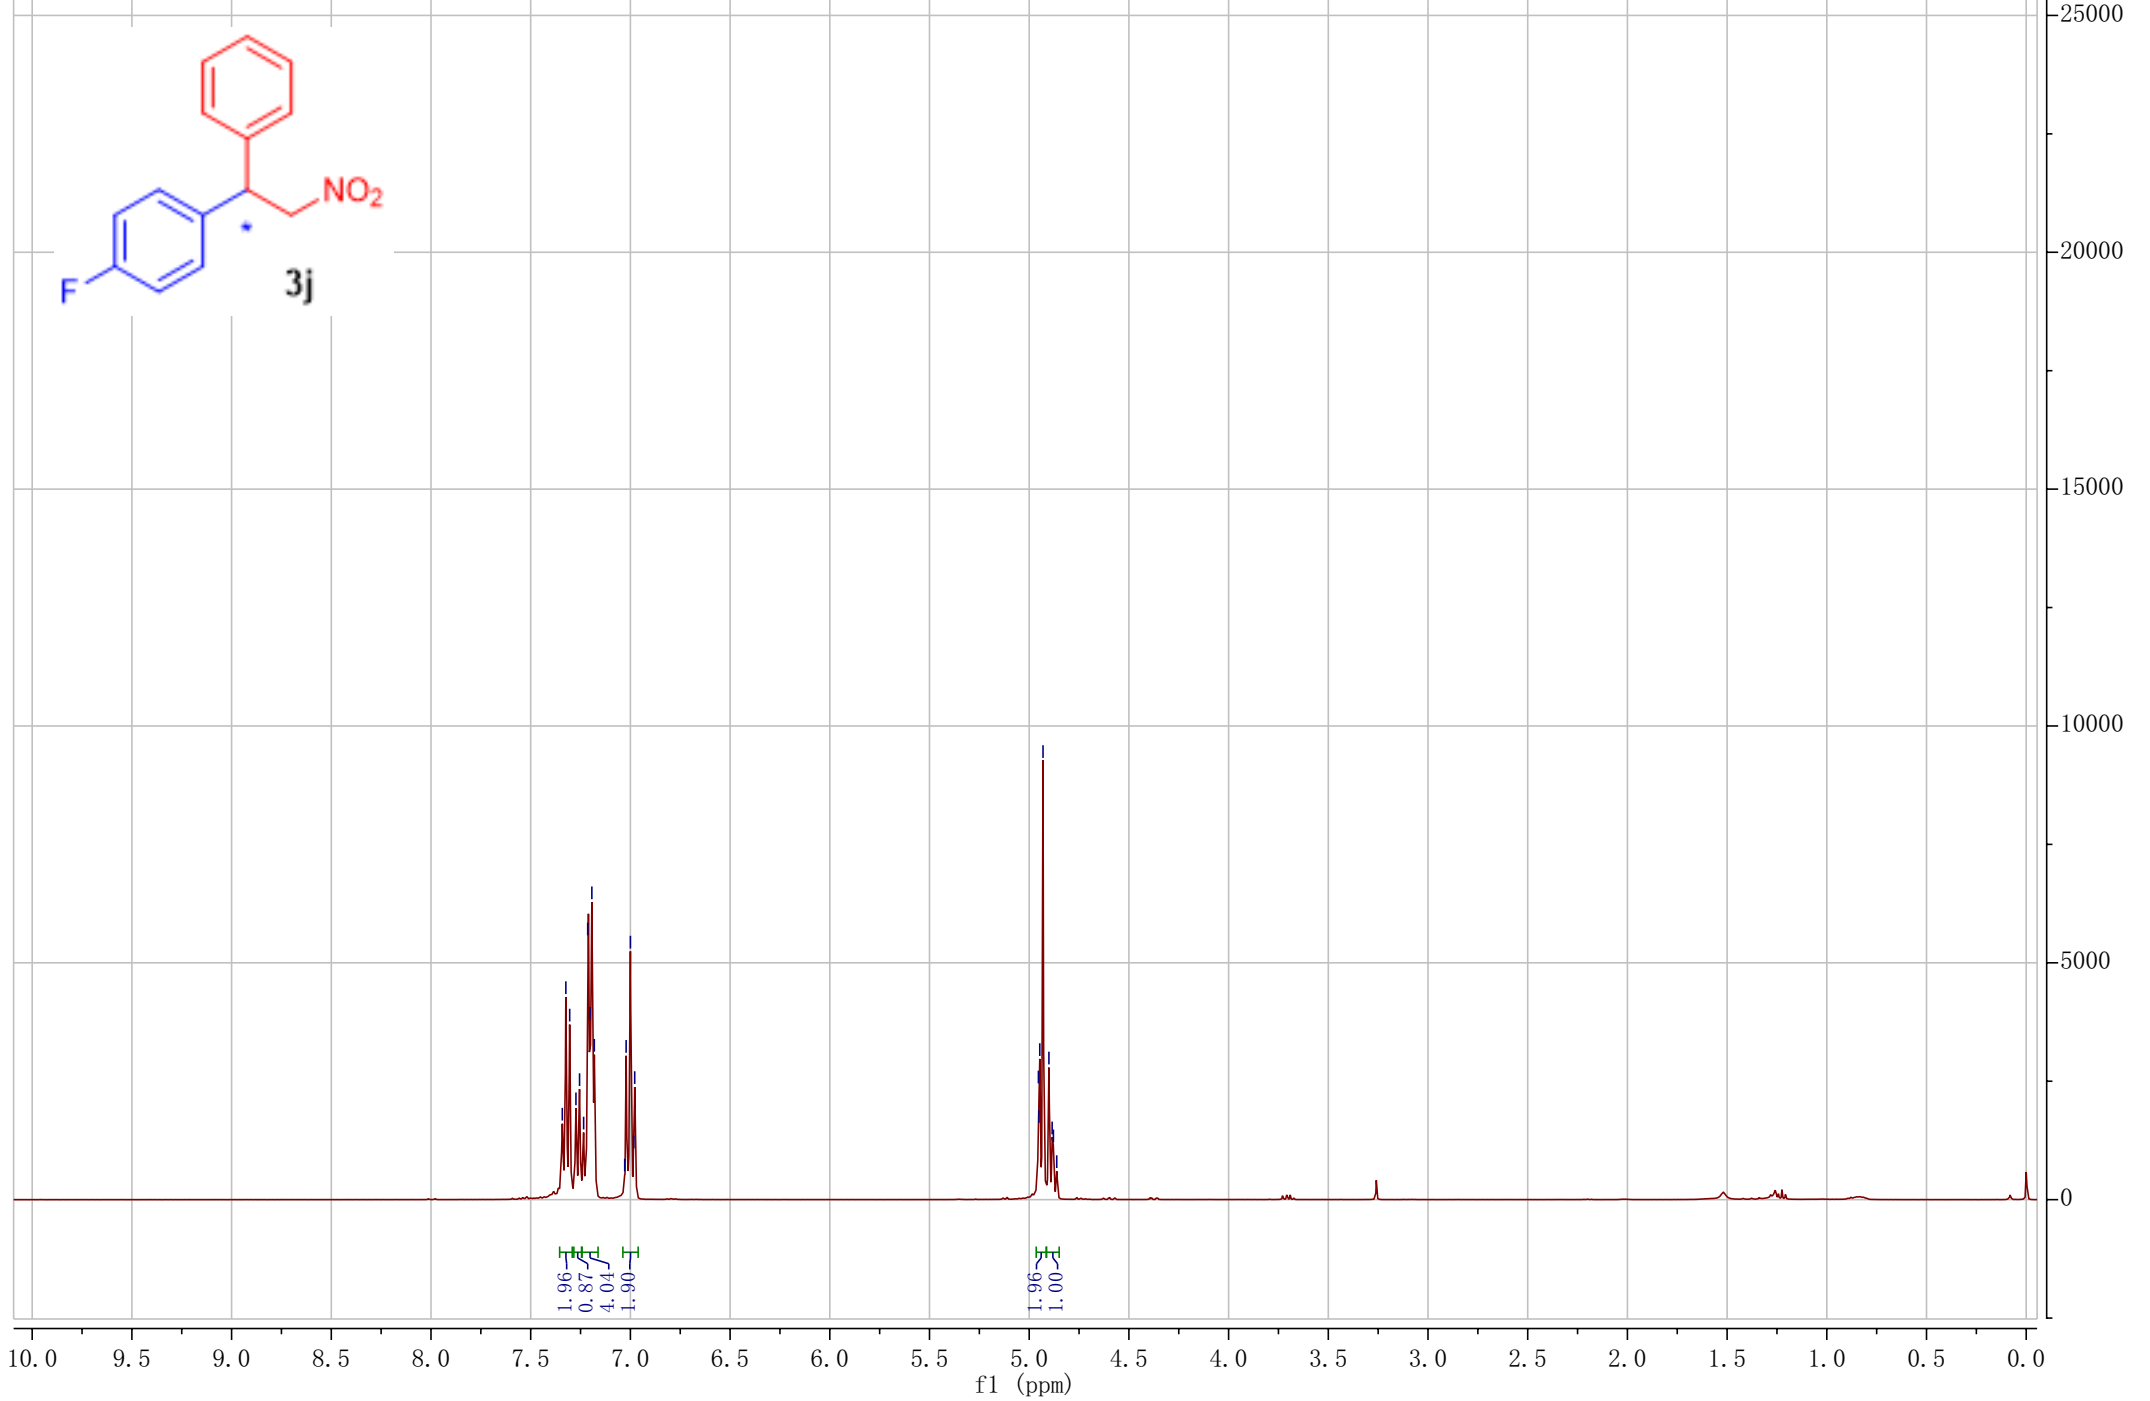

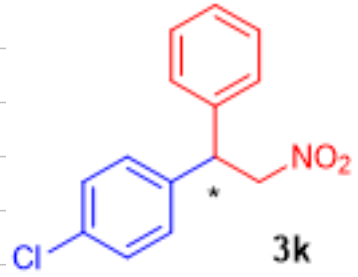

7.3545  
7.3374  
7.3331  
7.3223  
7.3183  
7.3129  
7.3079  
7.2970  
7.2916  
7.2861  
7.2716  
7.2151  
7.2108  
7.2054  
7.1980  
7.1933  
7.1865  
7.1812  
7.1704  
7.1653  
7.1583

4.9685  
4.9643  
4.9463  
4.9032  
4.8860  
4.8802  
4.8631

4.90  
3.85

2.07  
1.00

9.5 9.0 8.5 8.0 7.5 7.0 6.5 6.0 5.5 5.0 4.5 4.0 3.5 3.0 2.5 2.0

f1 (ppm)

24000  
23000  
22000  
21000  
20000  
19000  
18000  
17000  
16000  
15000  
14000  
13000  
12000  
11000  
10000  
9000  
8000  
7000  
6000  
5000  
4000  
3000  
2000  
1000  
0  
-1000  
-2000

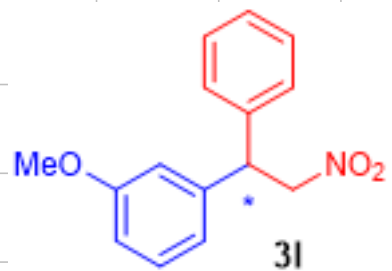

7.3480  
7.3446  
7.3408  
7.3322  
7.3274  
7.3239  
7.3188  
7.3126  
7.3089  
7.3065  
7.3027  
7.2741  
7.2704  
7.2679  
7.2557  
7.2487  
7.2370  
7.2322  
7.2287  
6.8416  
6.8223  
6.8064  
6.8042  
6.8001  
6.7977  
6.7863  
6.7839  
6.7799  
6.7776  
6.7695  
6.7645  
6.7590

4.9824  
4.9792  
4.9606  
4.8929  
4.8749  
4.8706  
4.8525

3.7707

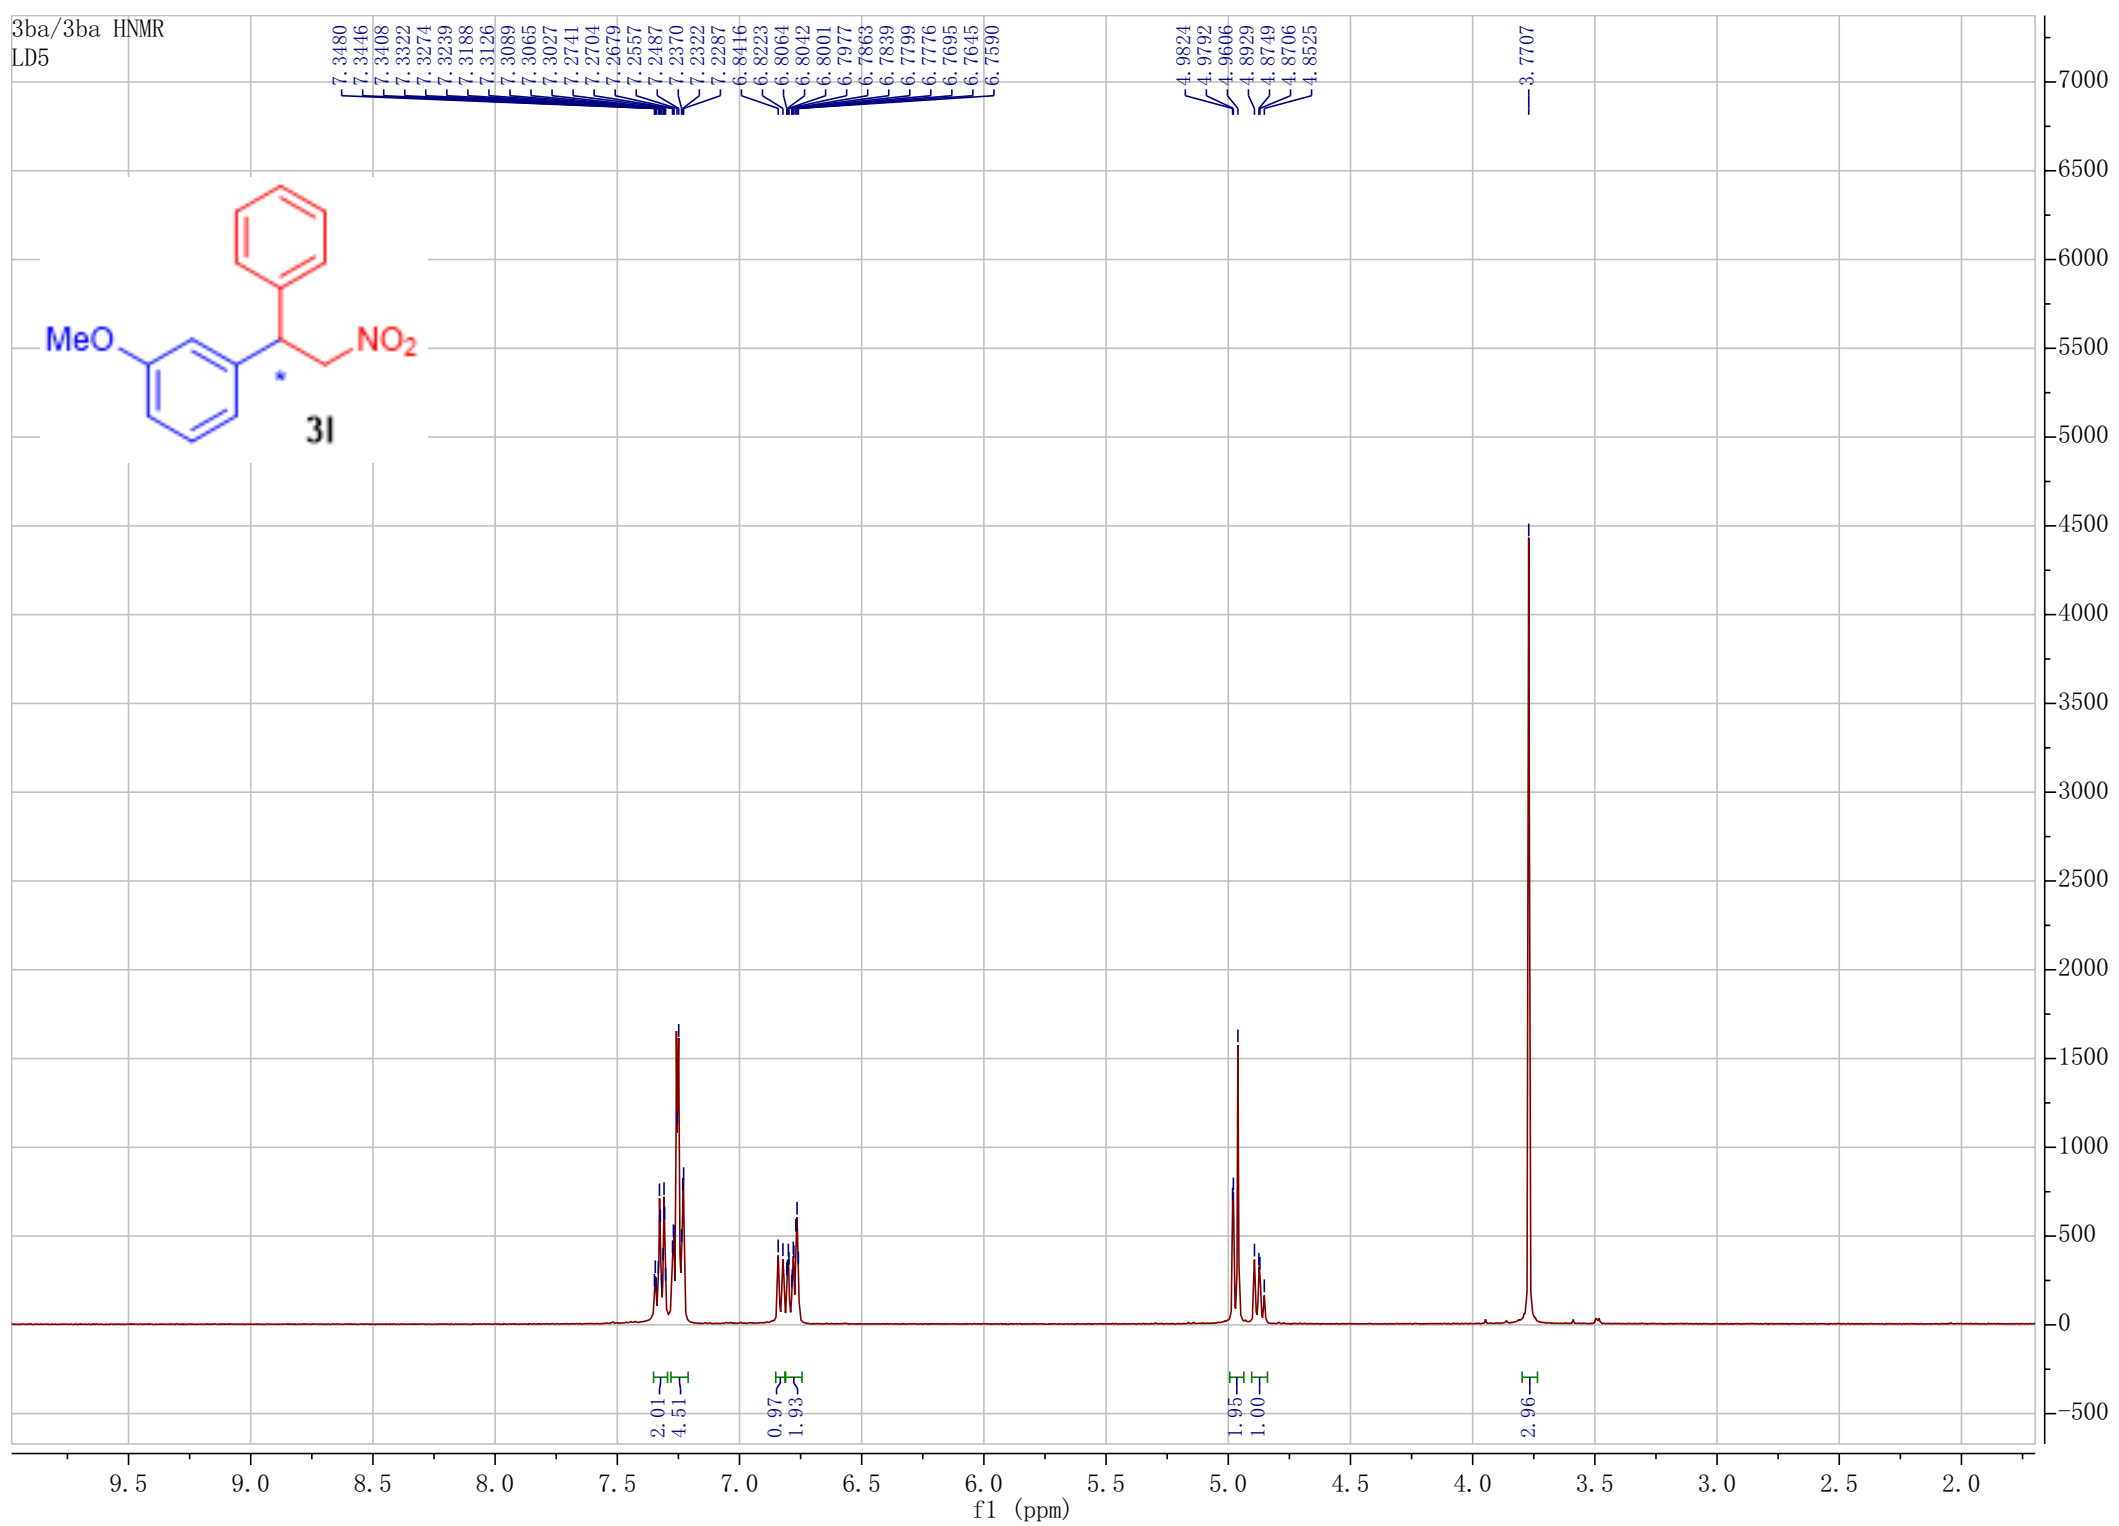

3an/3an HNMR  
LC10

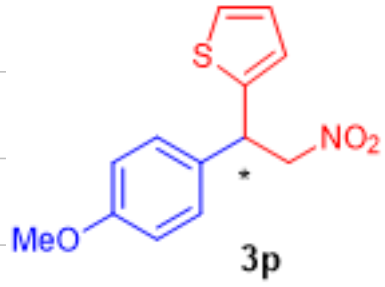

7.2363  
7.2285  
7.2256  
7.2226  
7.2126  
7.2097  
7.2066  
7.1987  
6.9582  
6.9493  
6.9453  
6.9366  
6.8952  
6.8925  
6.8892  
6.8837  
6.8808  
6.8726  
6.8672  
6.8592

5.0999  
5.0799  
5.0598  
4.9913  
4.9724  
4.9598  
4.9410  
4.9132  
4.8918  
4.8817  
4.8603

3.7915

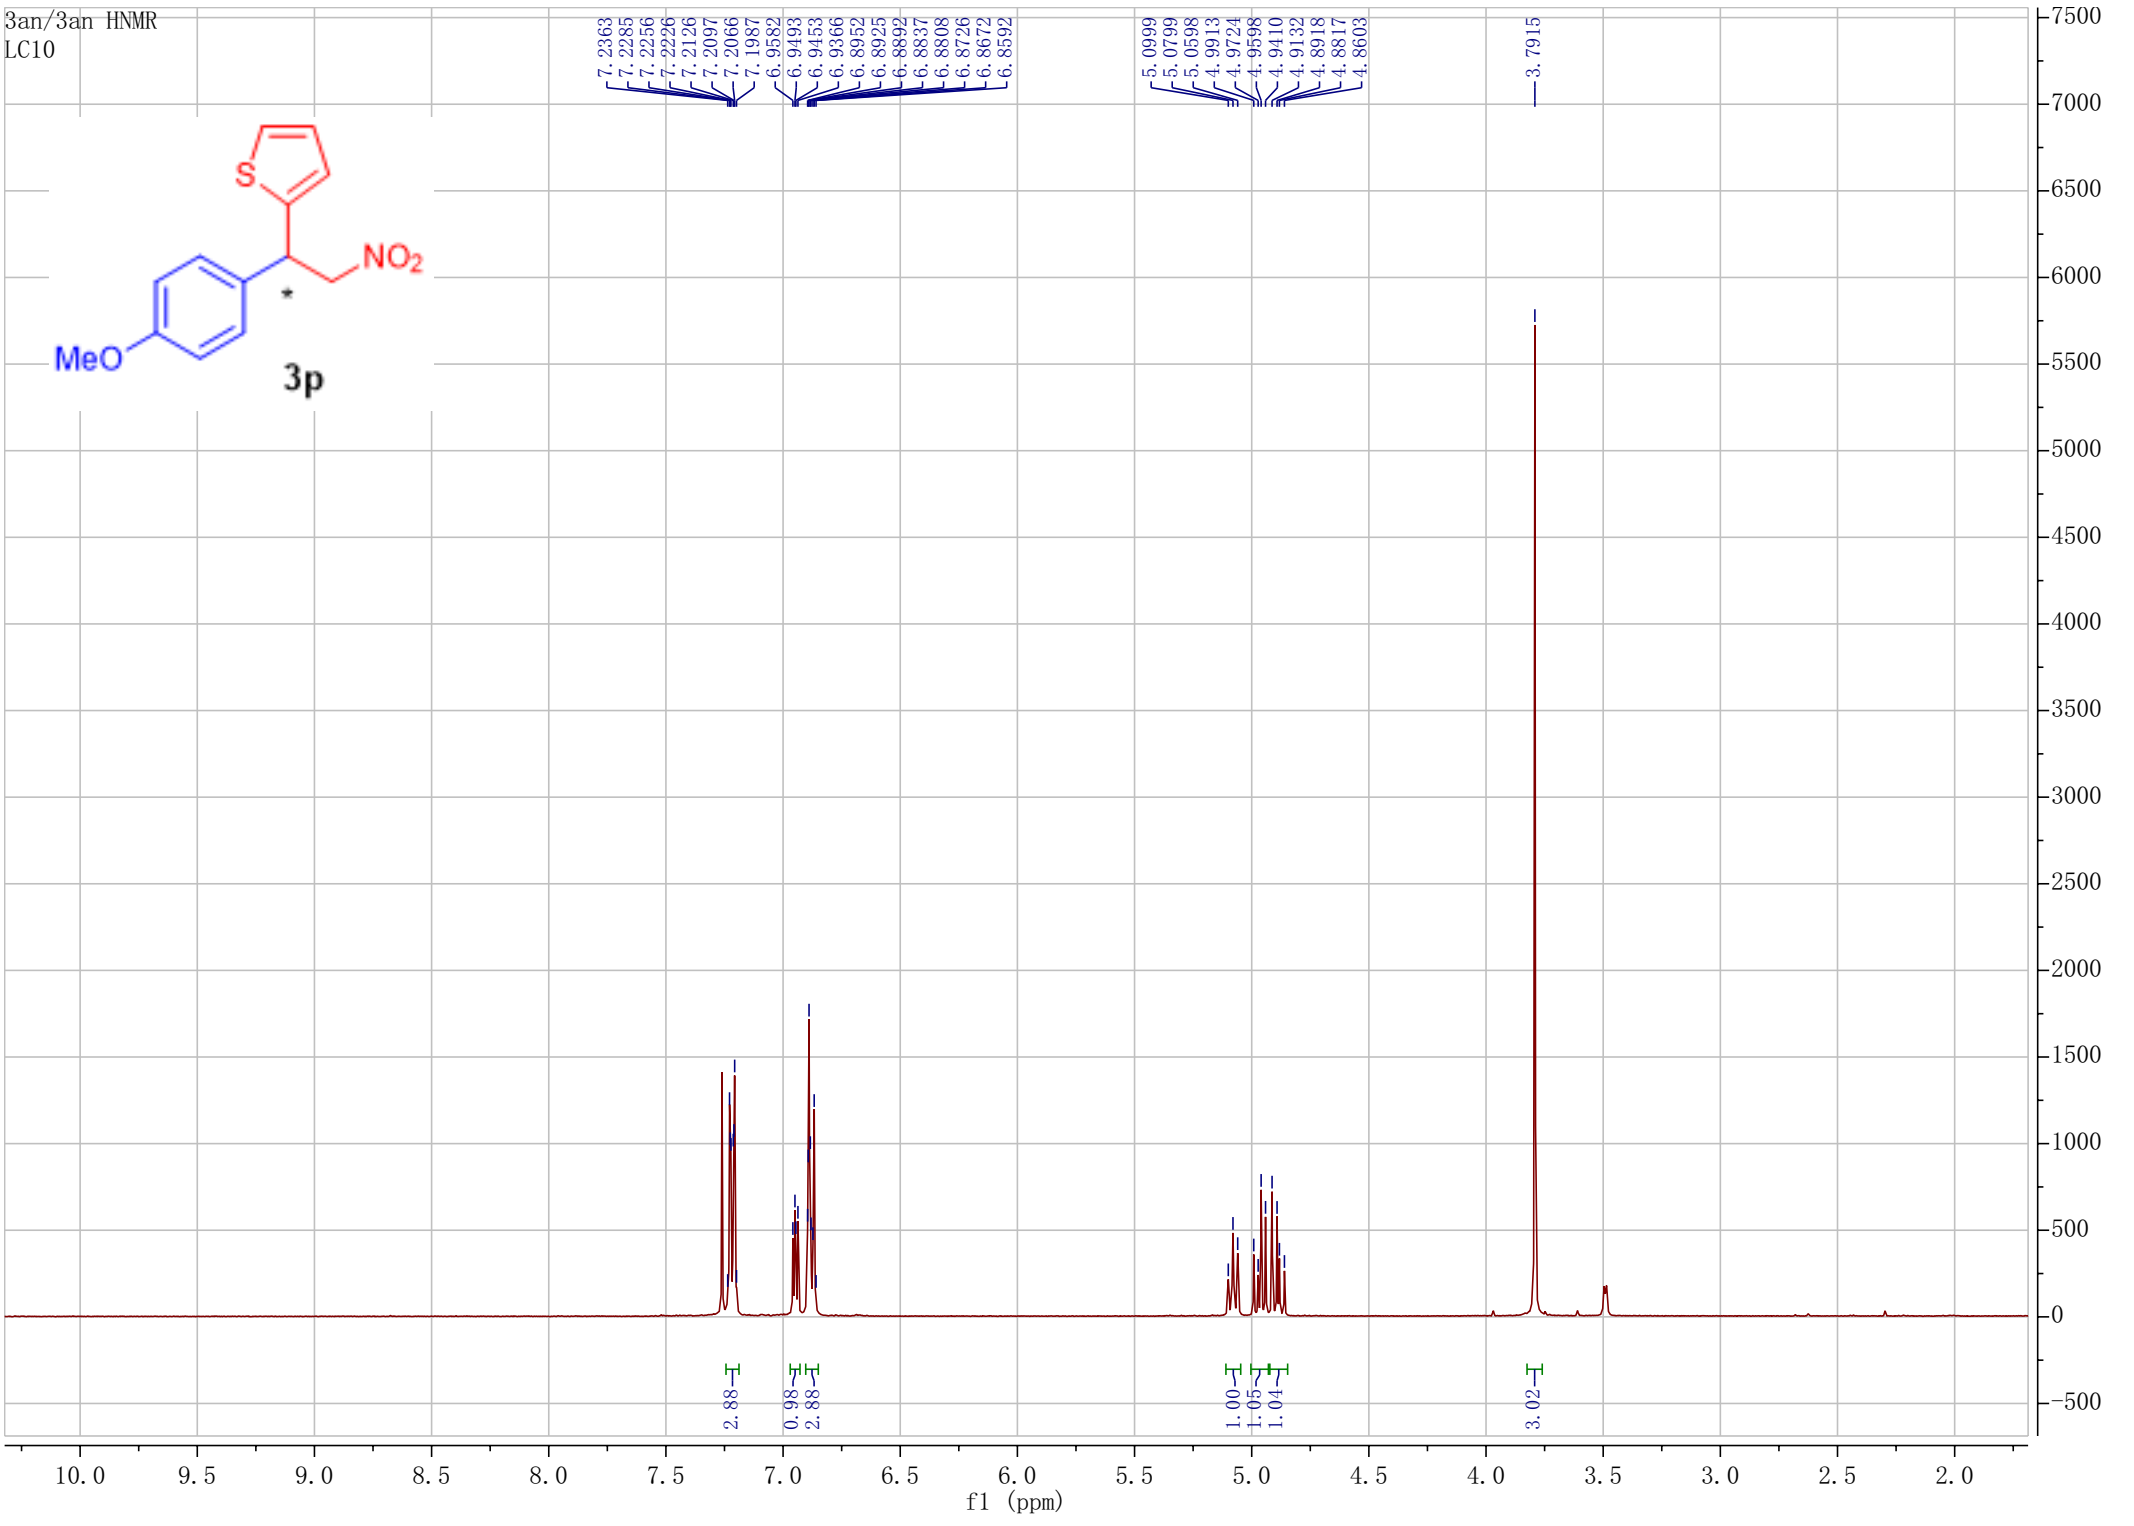

3cf  
K79

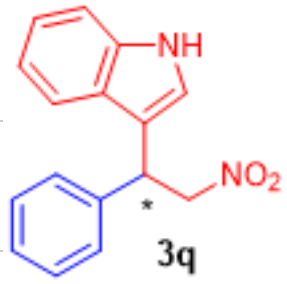

8.0783  
7.4484  
7.4284  
7.3510  
7.3393  
7.3251  
7.3191  
7.3100  
7.2949  
7.2897  
7.2689  
7.2628  
7.2557  
7.2472  
7.2404  
7.2104  
7.2084  
7.1905  
7.1724  
7.0897  
7.0878  
7.0699  
7.0520  
7.0504  
7.0093  
7.0033  
5.2032  
5.1831  
5.1632  
5.0804  
5.0612  
5.0492  
5.0300  
4.9568  
4.9359  
4.9257  
4.9047

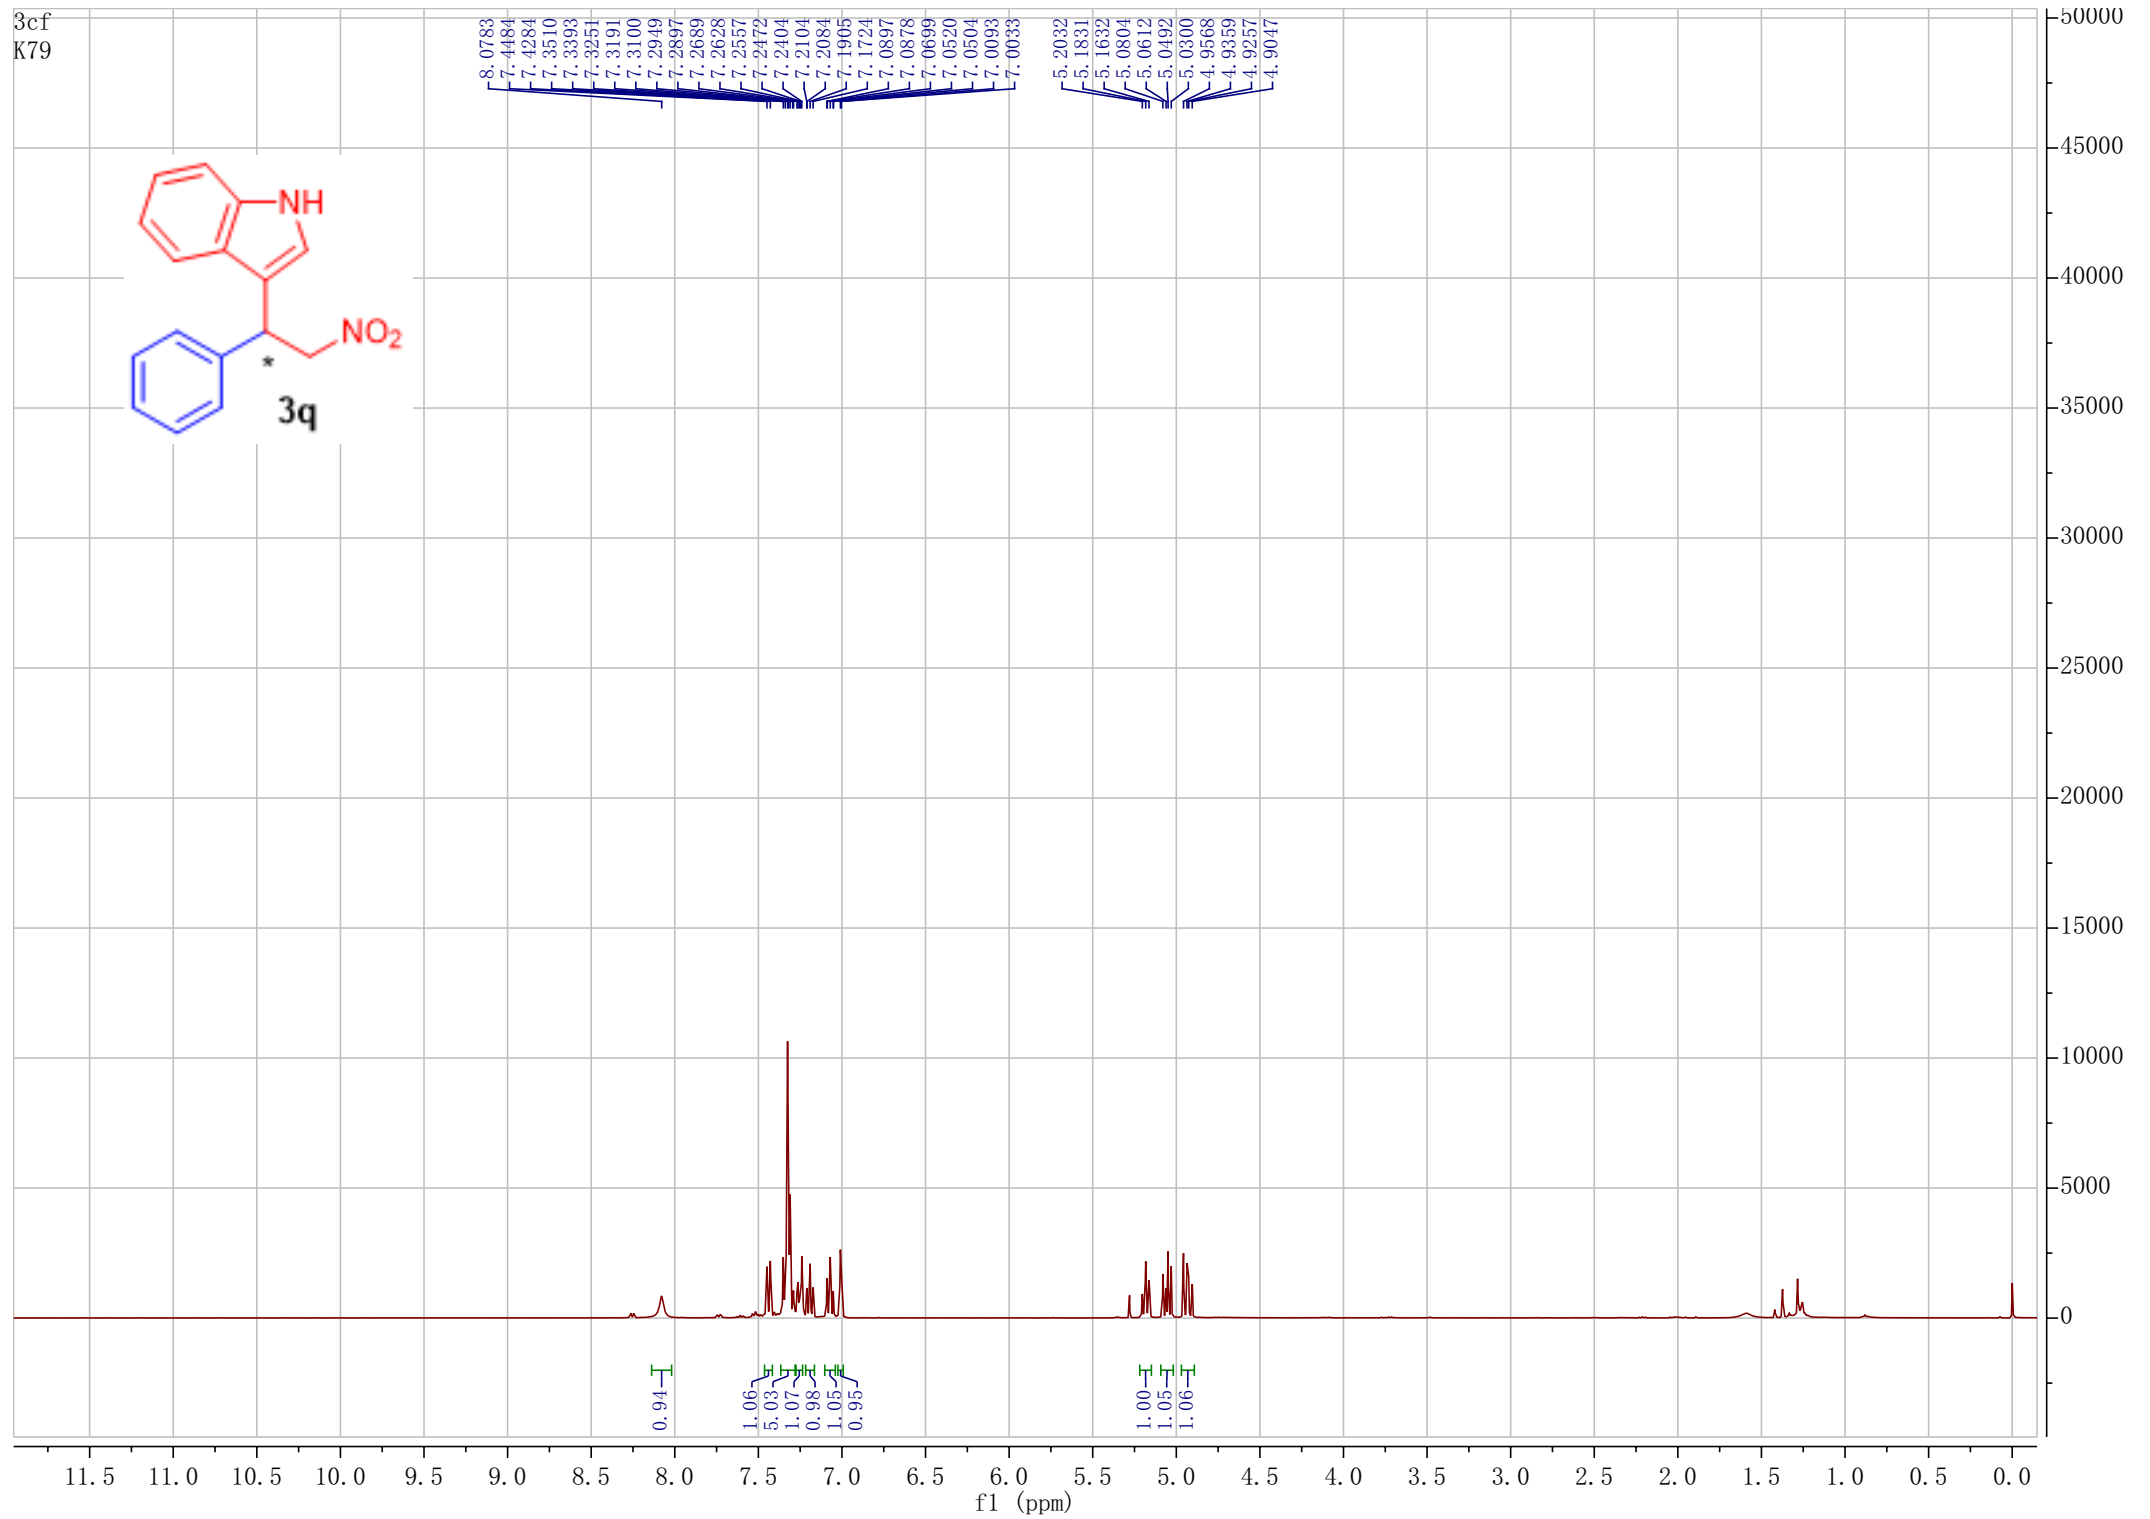



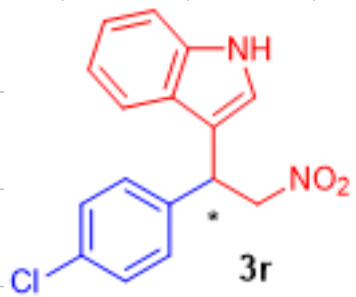

8.0775  
7.3672  
7.3515  
7.3230  
7.3069  
7.2514  
7.1801  
7.1656  
7.1506  
7.0549  
7.0404  
7.0259  
6.9618  
6.9433

5.1437  
5.1284  
5.1126  
5.0265  
5.0021  
4.9871  
4.8749  
4.8543  
4.8330

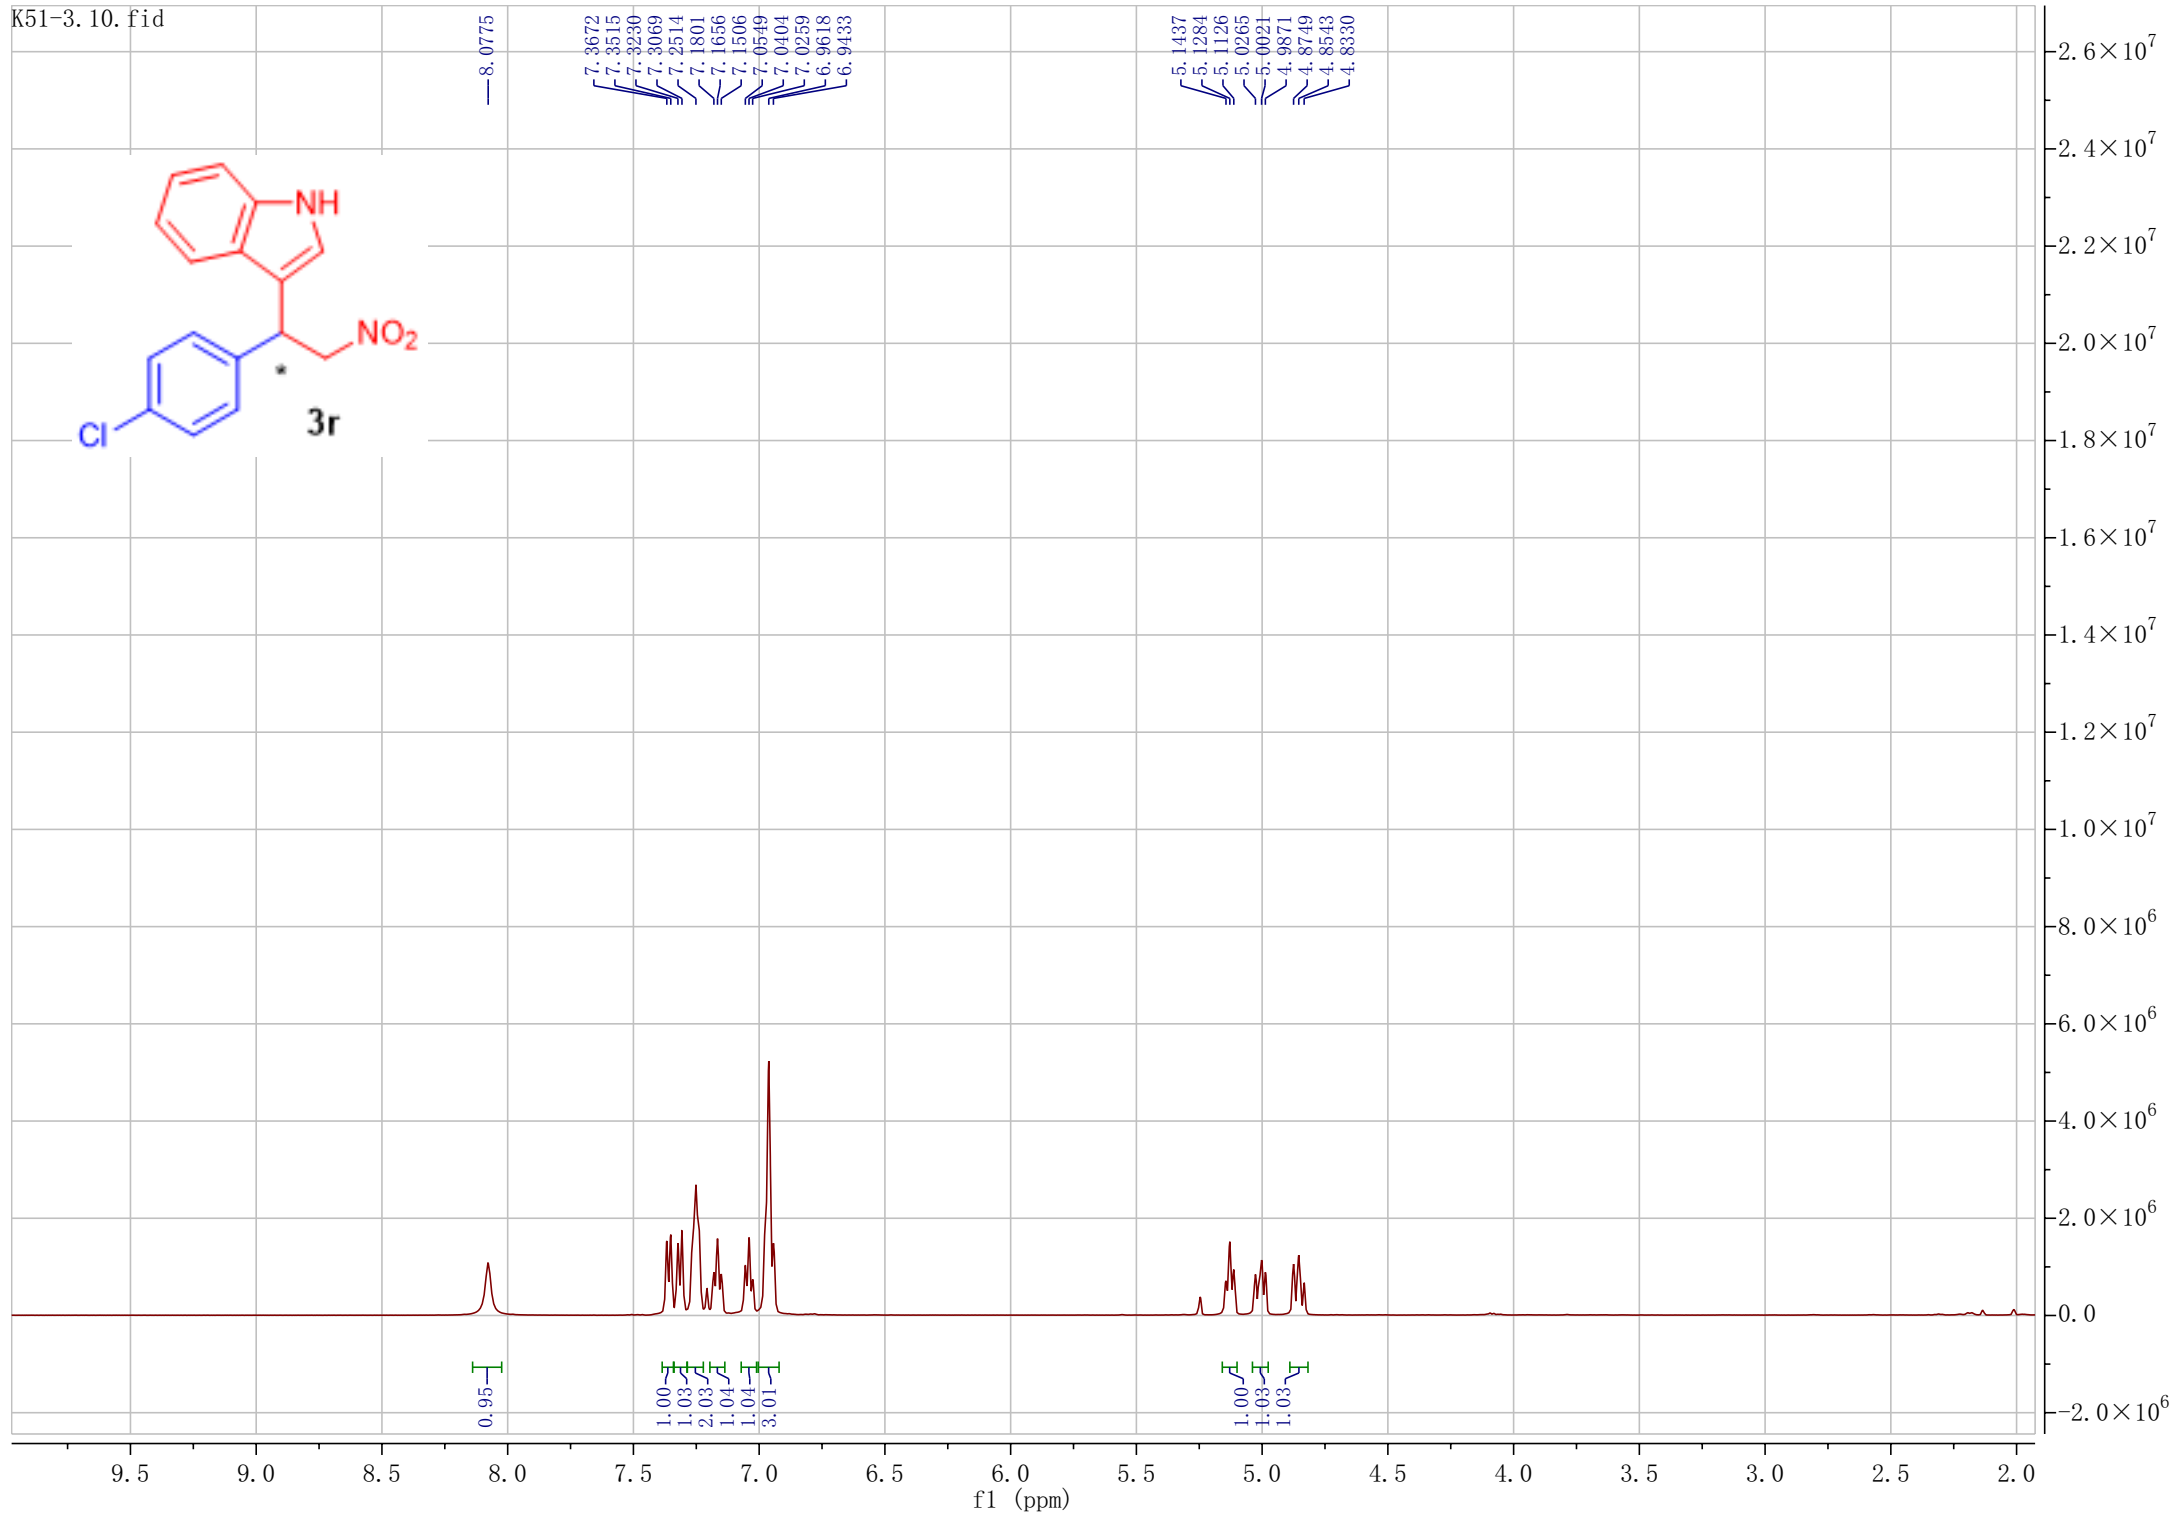

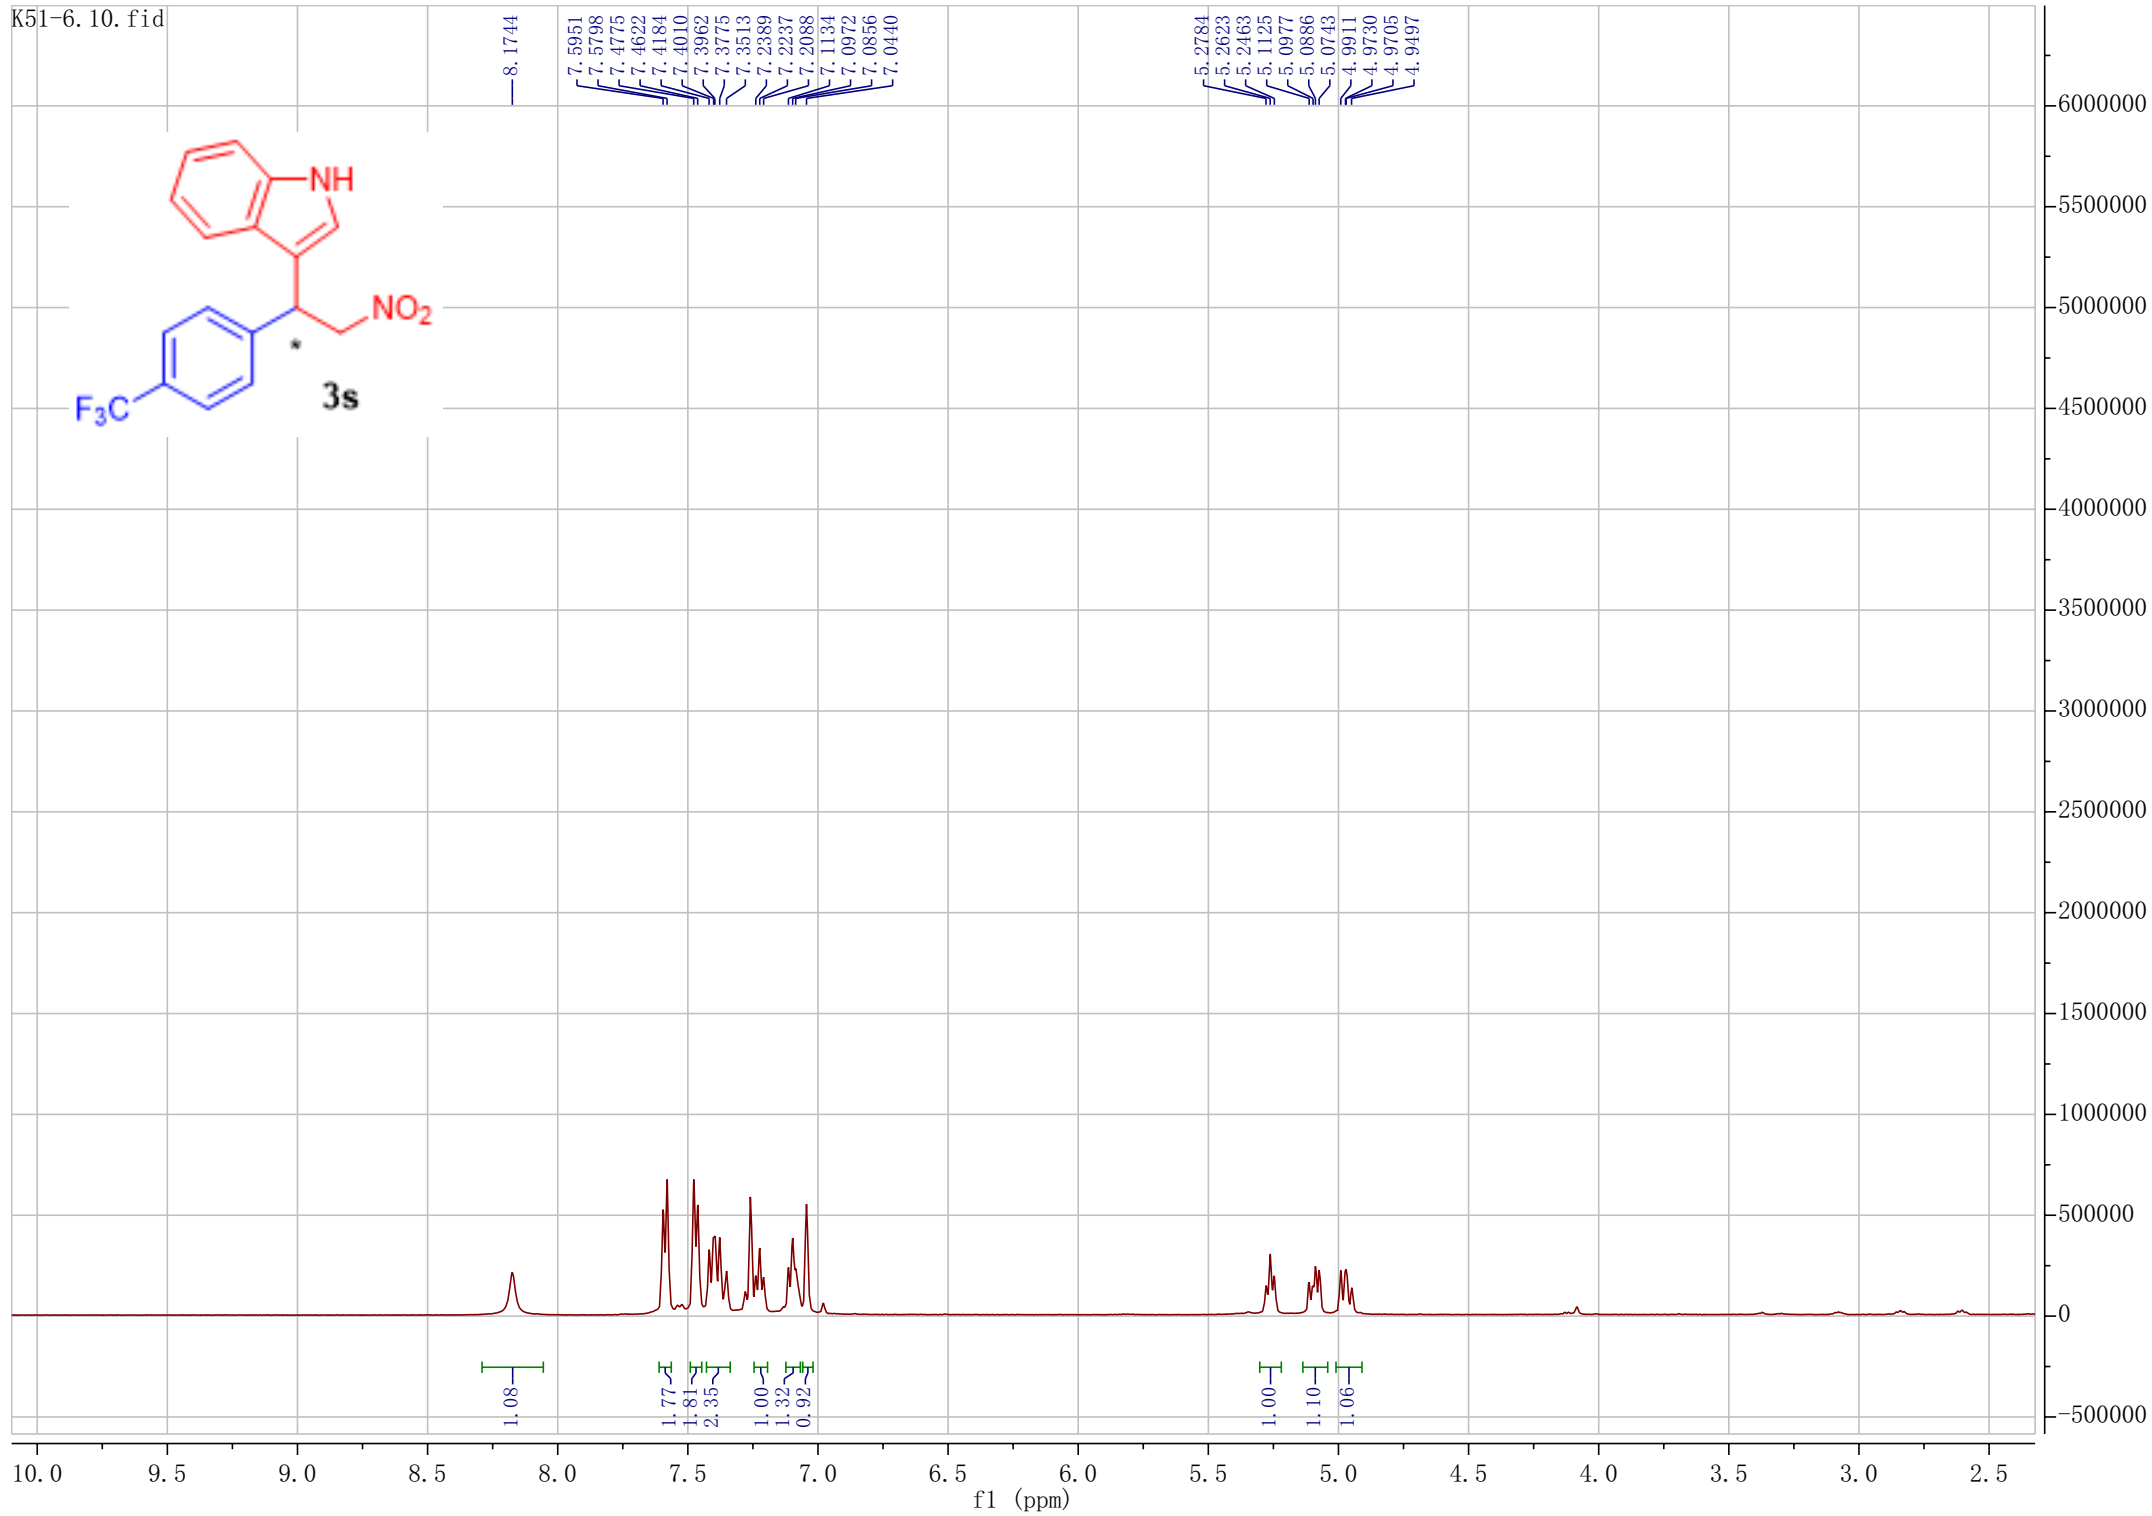

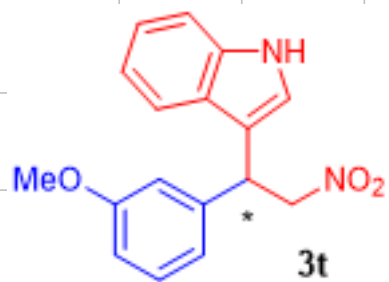

8.1036  
7.4765  
7.4607  
7.3609  
7.3450  
7.2420  
7.2260  
7.2106  
7.1960  
7.1808  
7.0958  
7.0810  
7.0663  
7.0362  
6.9415  
6.9266  
6.8677  
6.7996  
6.7833

5.1776  
5.1621  
5.1464  
5.0688  
5.0448  
5.0286  
4.9517  
4.9328  
4.9101

3.7593

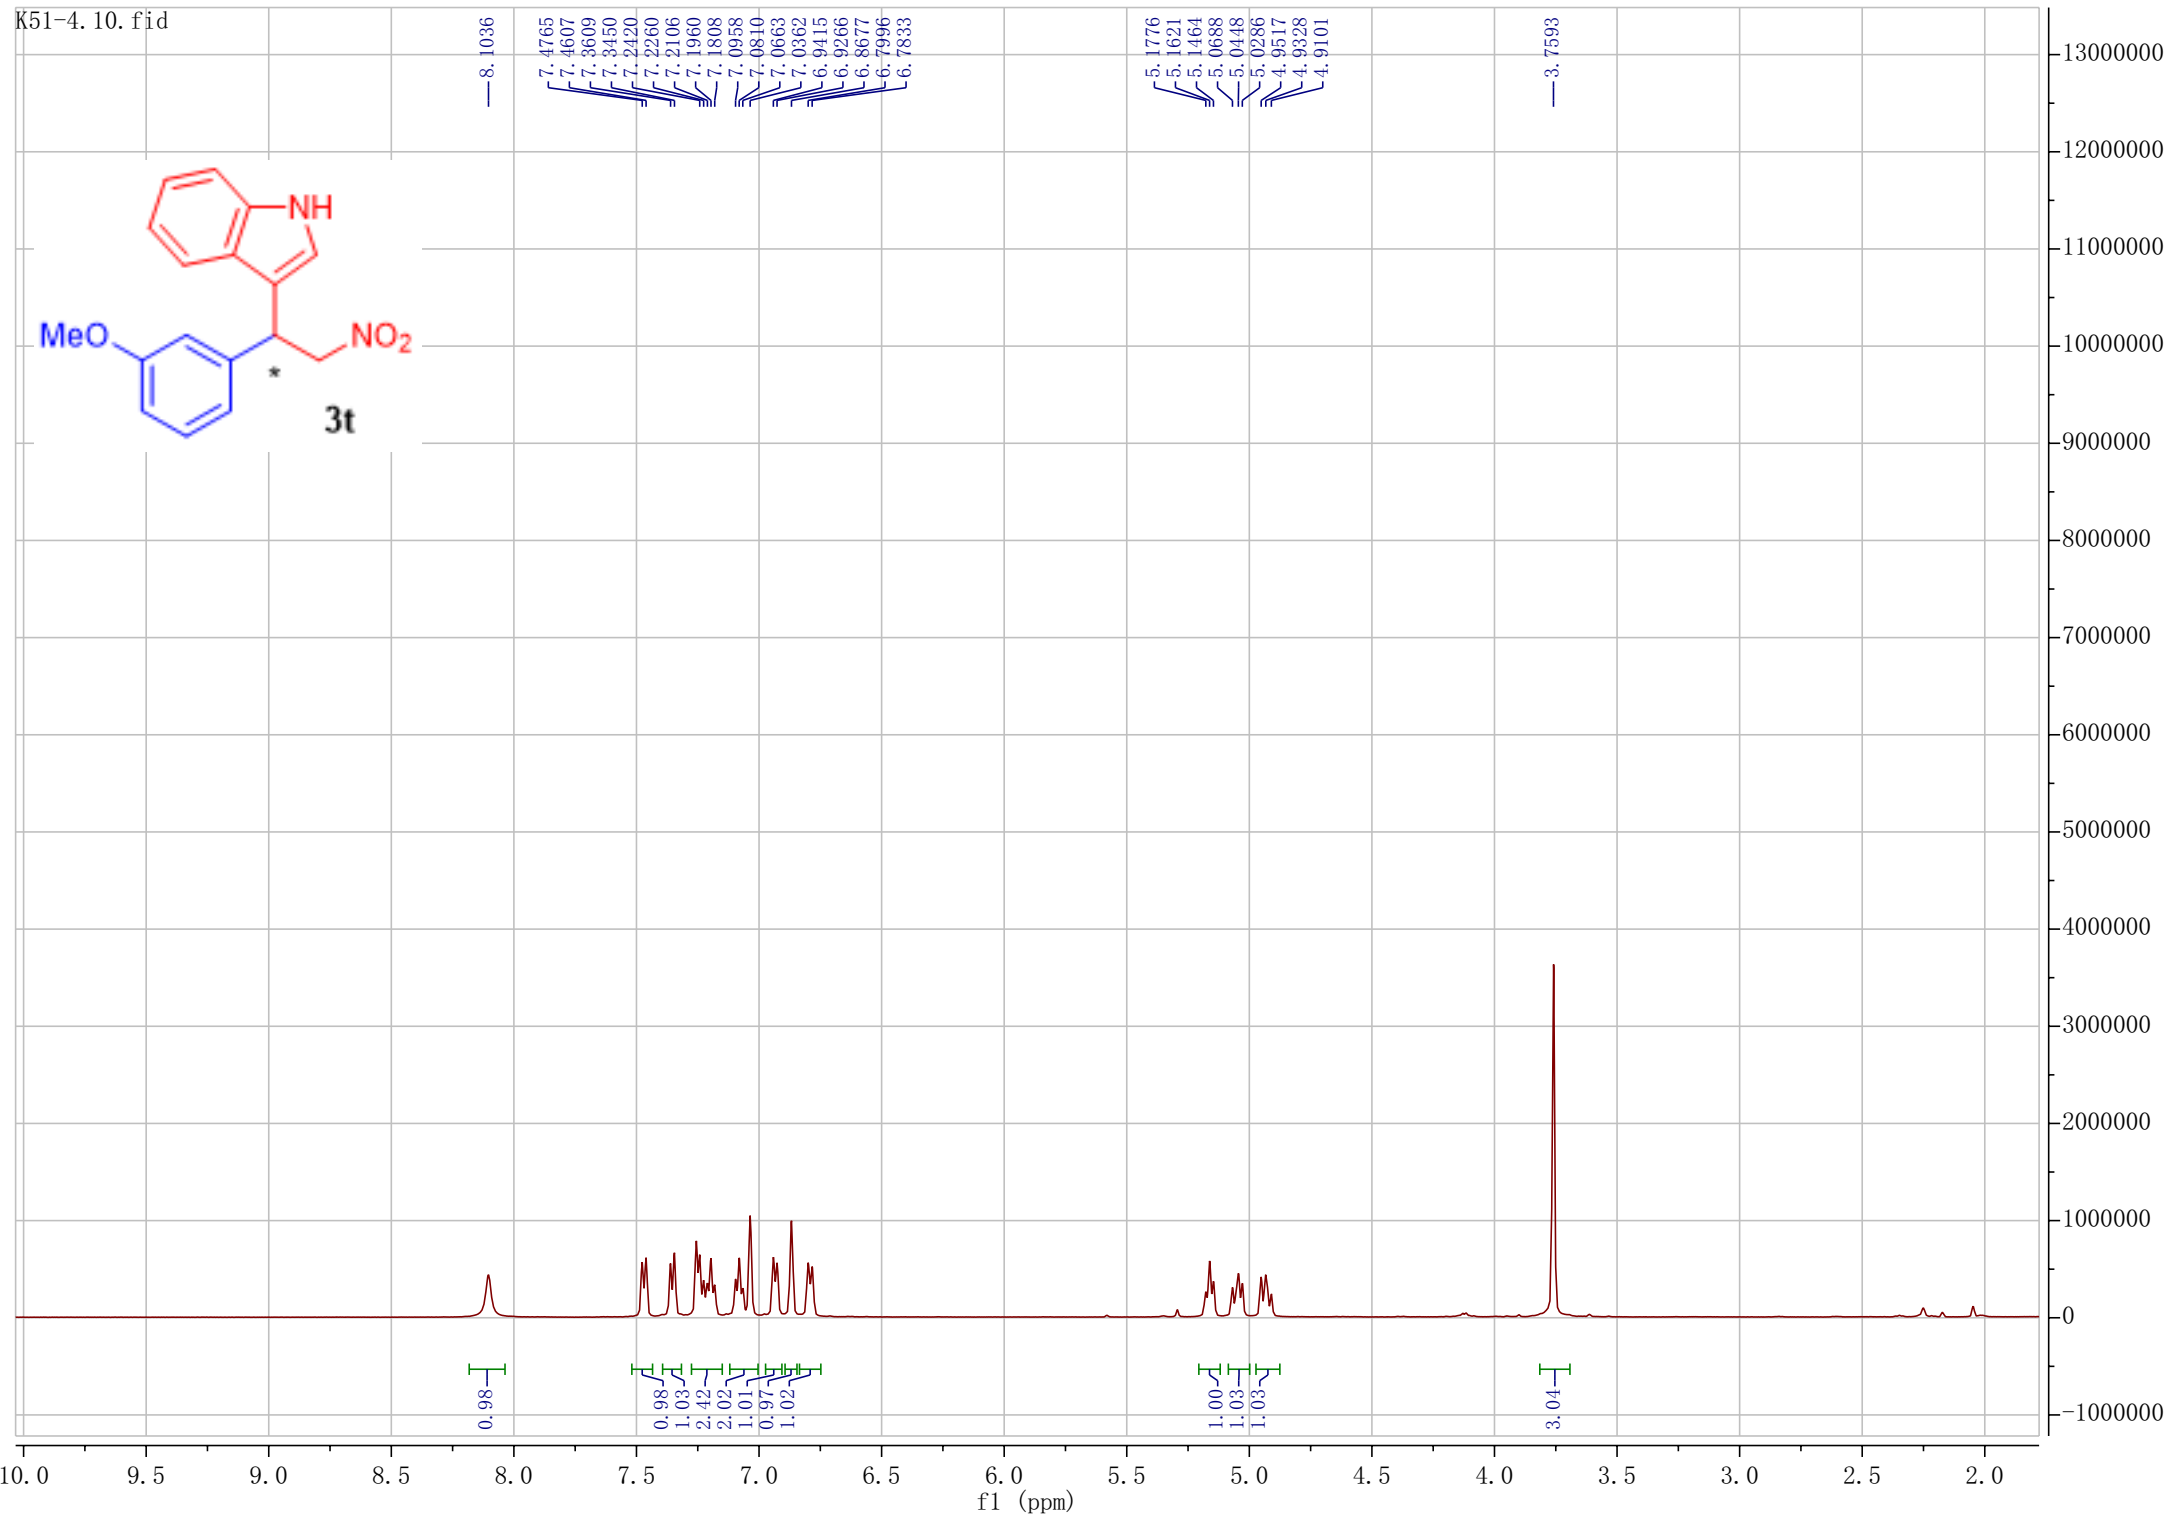

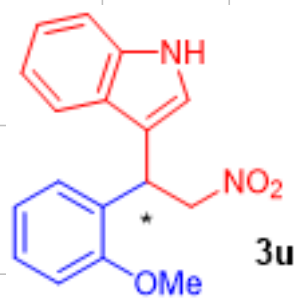

8.0271  
 7.4552  
 7.4397  
 7.2928  
 7.2767  
 7.2136  
 7.2008  
 7.1853  
 7.1643  
 7.1501  
 7.1351  
 7.0728  
 7.0516  
 7.0439  
 7.0263  
 6.8974  
 6.8812  
 6.8169  
 6.8027  
 6.7883  
 5.5945  
 5.5795  
 5.5645  
 5.0255  
 5.0102  
 5.0008  
 4.9877  
 4.9627  
 4.9418  
 4.9196  
 3.8729

1.00  
 1.00  
 0.99  
 1.08  
 0.97  
 2.95  
 1.03  
 1.00  
 1.00  
 2.06  
 3.05

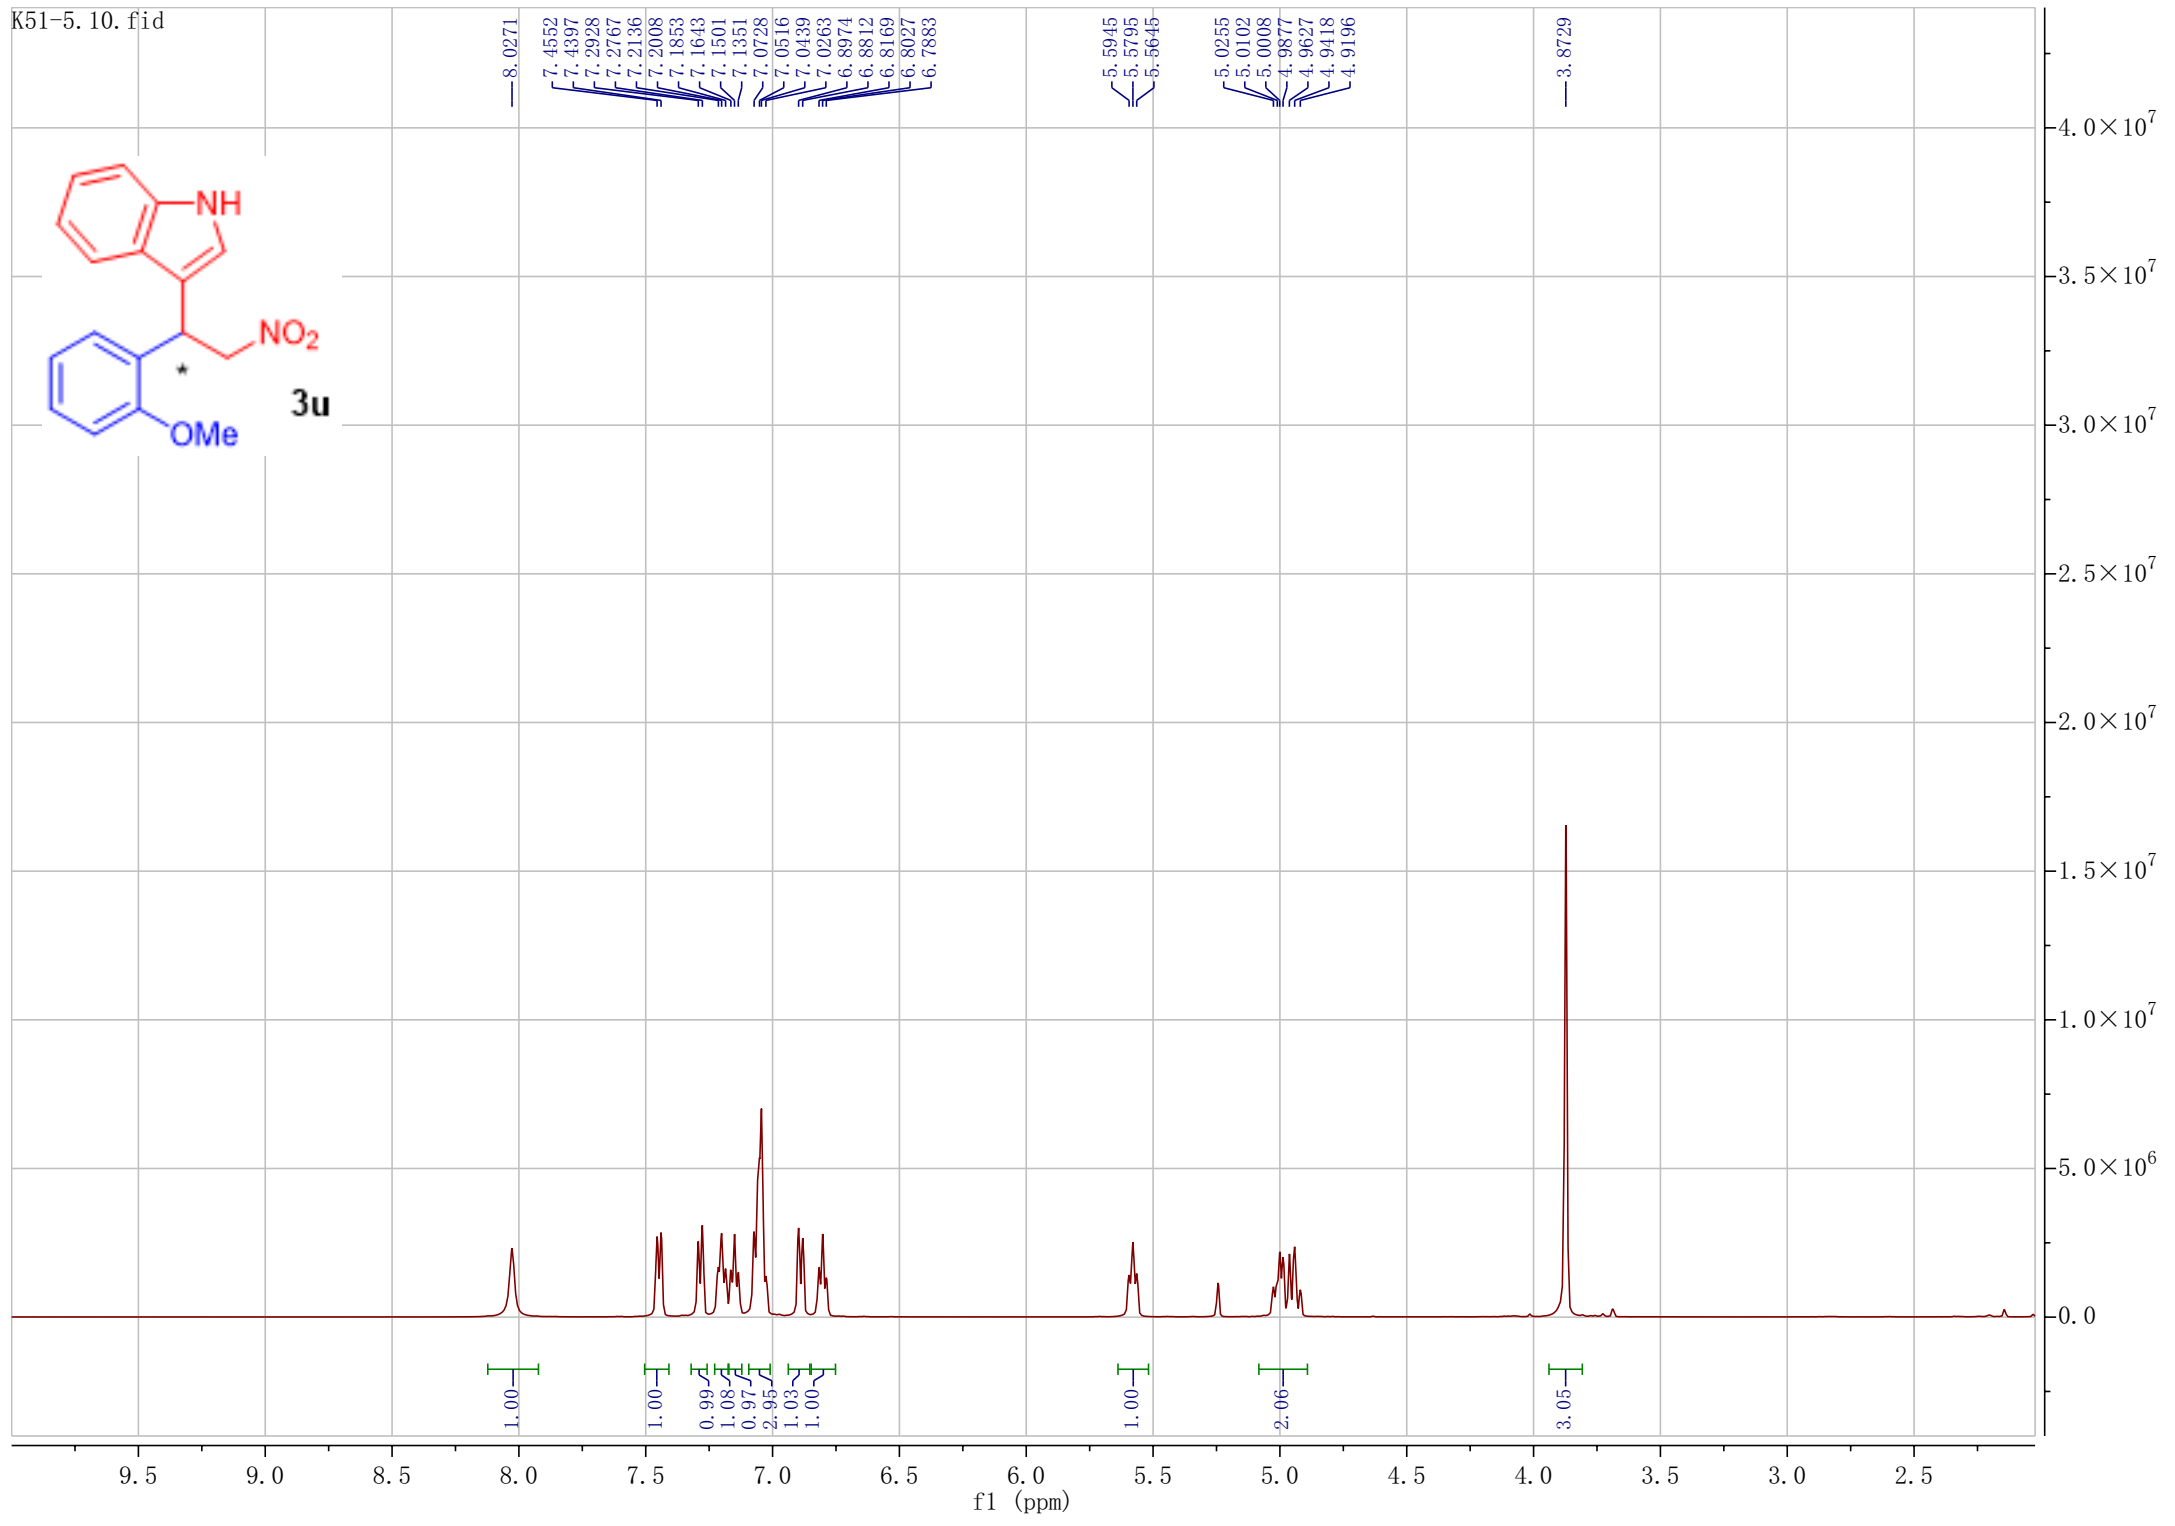

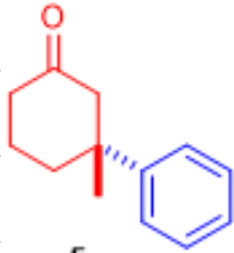

5a

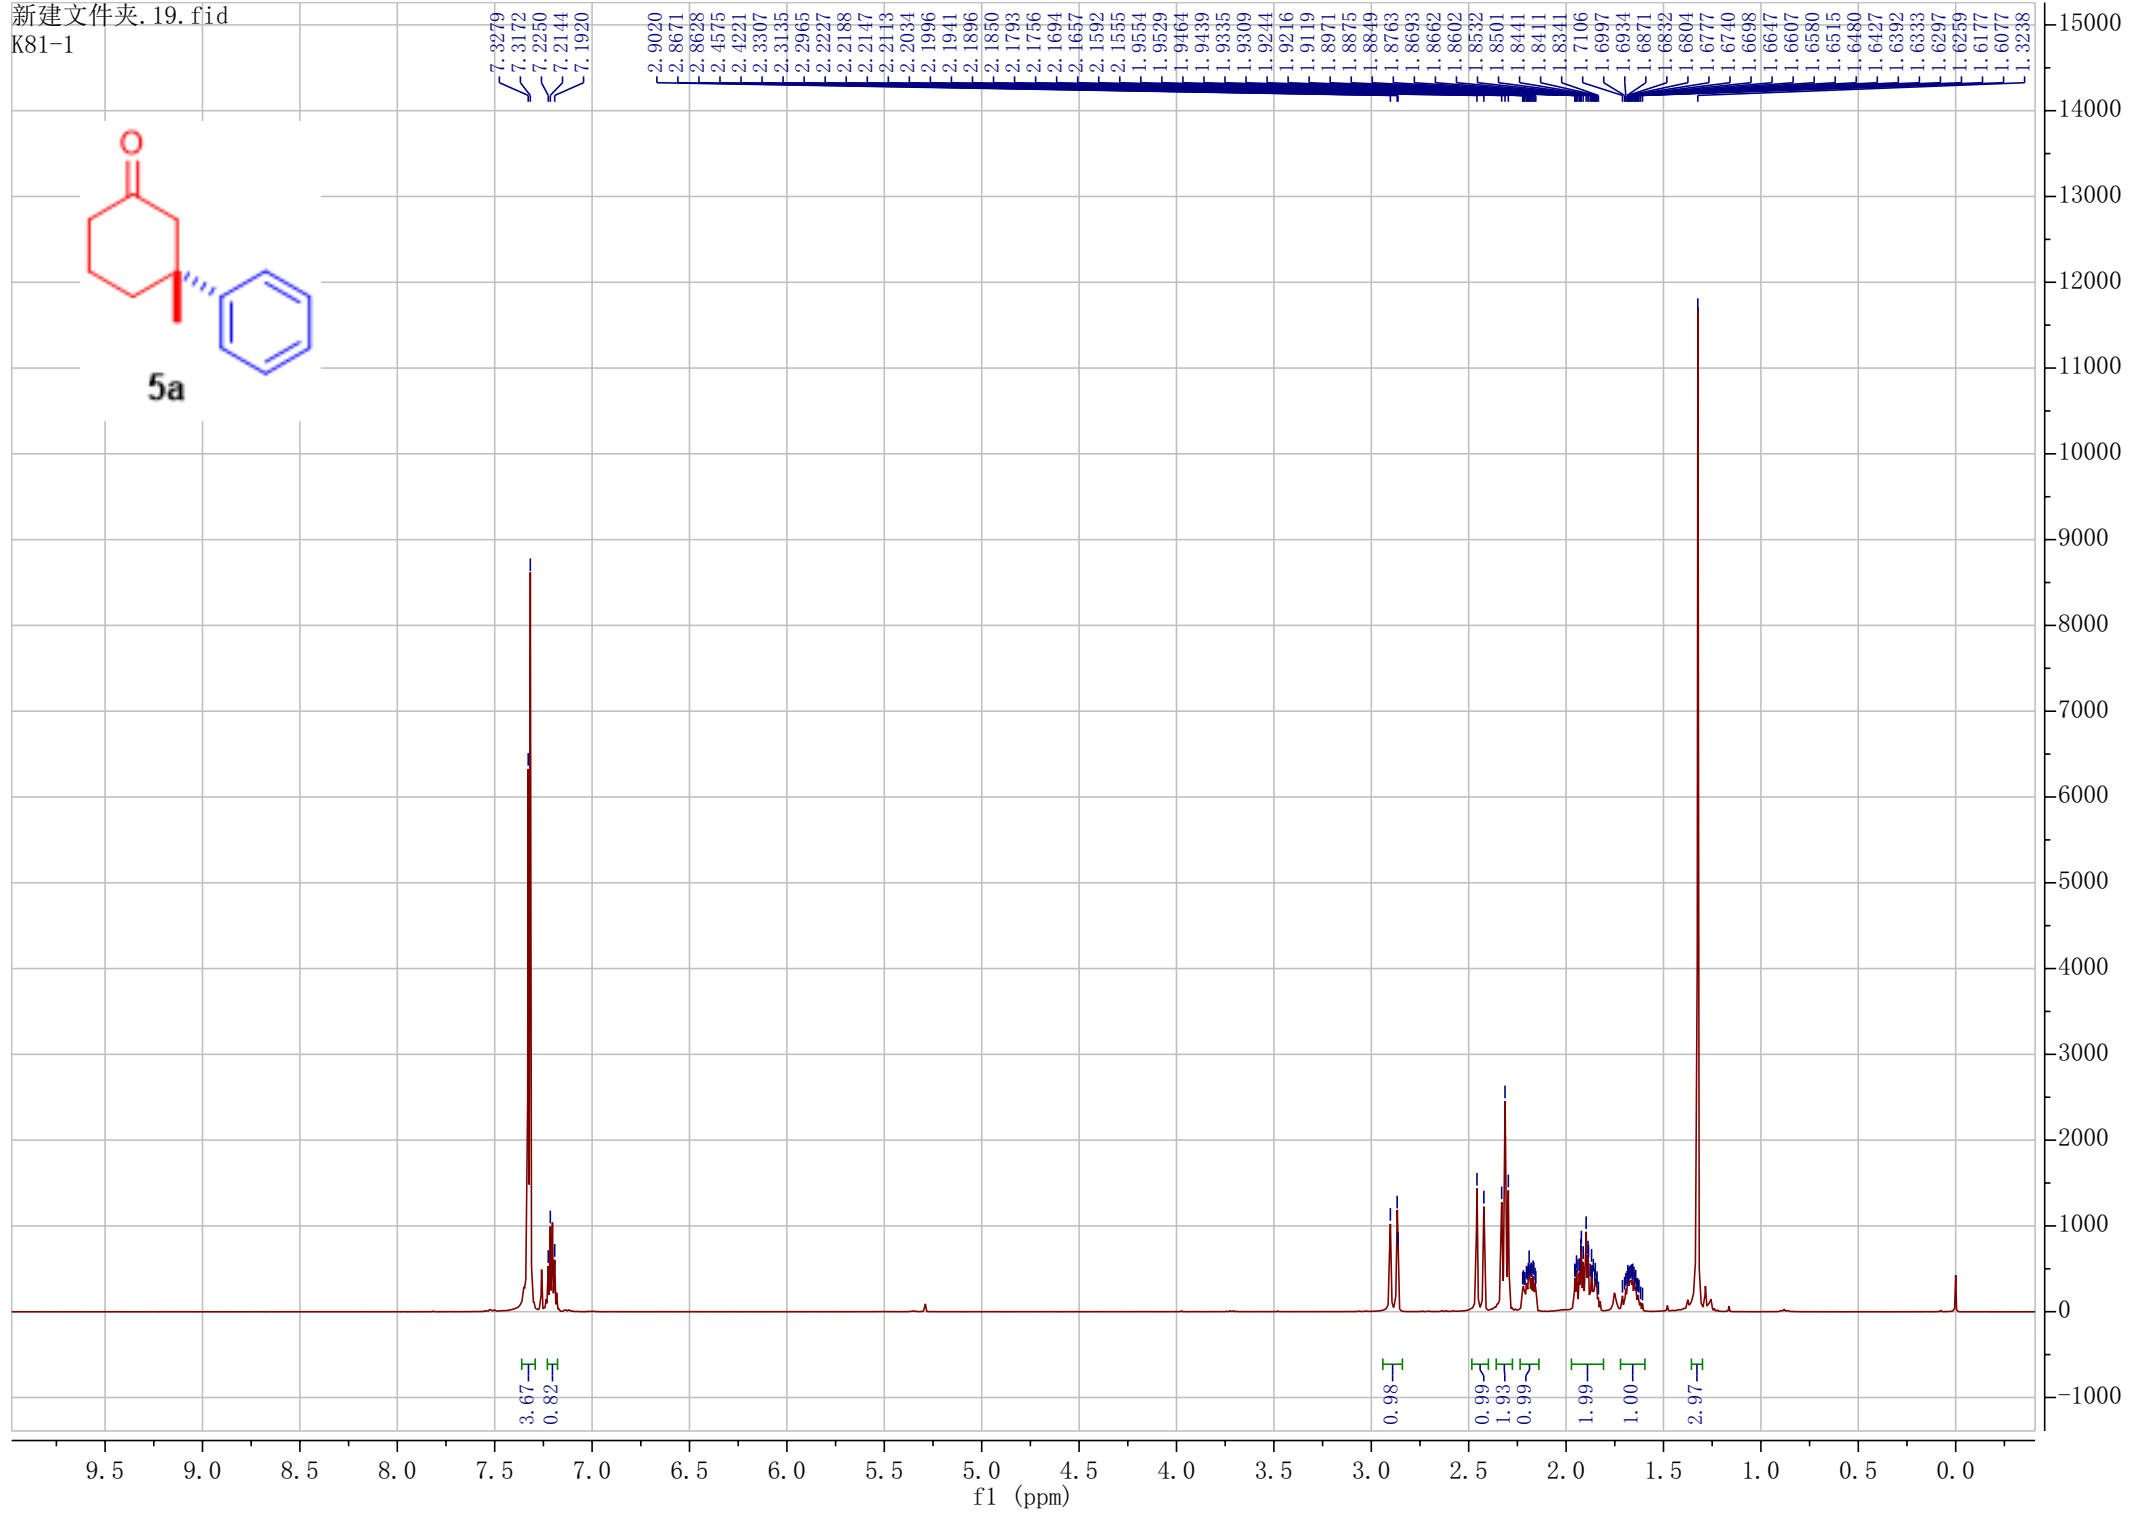

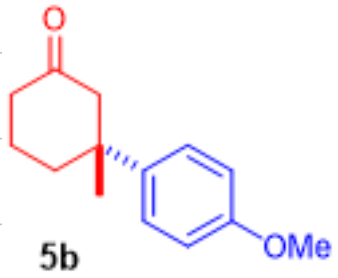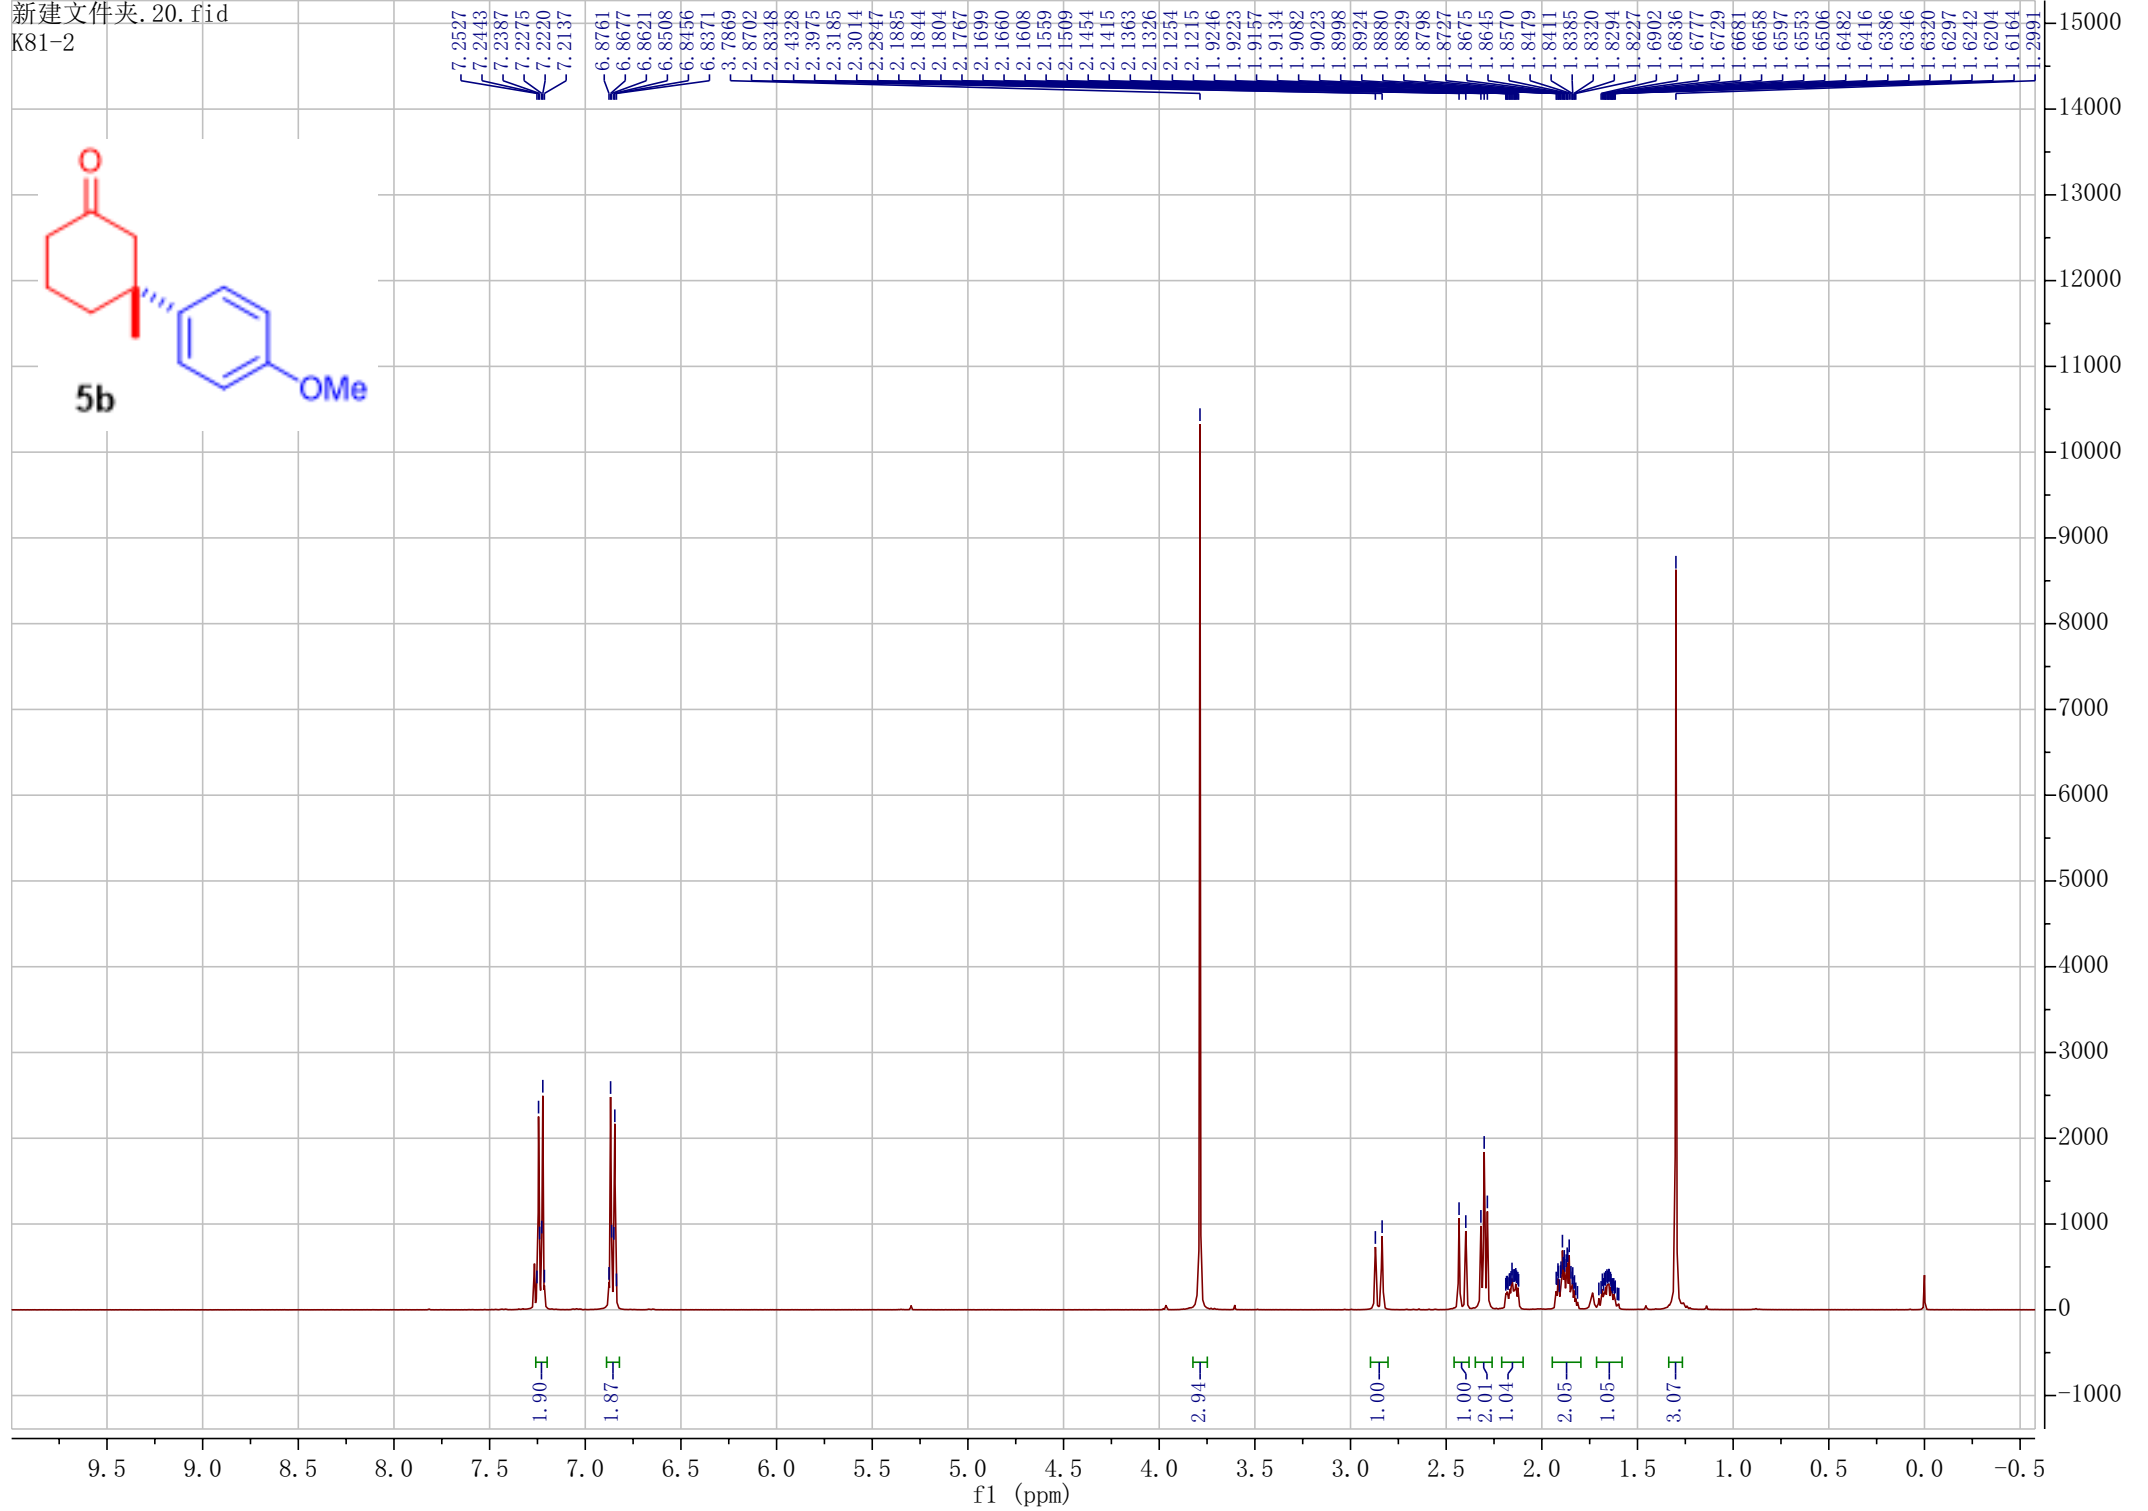

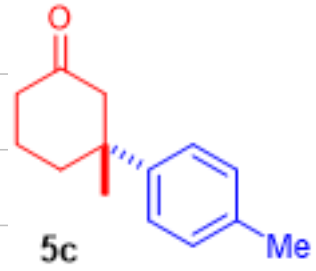

7.2185  
7.2138  
7.2029  
7.1976  
7.1420  
7.1262  
7.1216  
2.8808  
2.8454  
2.4353  
2.4009  
2.3985  
2.3153  
2.3030  
2.2866  
2.1996  
2.1958  
2.1917  
2.1879  
2.1806  
2.1767  
2.1712  
2.1666  
2.1620  
2.1564  
2.1528  
2.1468  
2.1430  
2.1362  
2.1323  
1.9320  
1.9294  
1.9229  
1.9203  
1.9103  
1.9076  
1.9014  
1.8983  
1.8953  
1.8898  
1.8866  
1.8751  
1.8720  
1.8658  
1.8595  
1.8568  
1.8505  
1.8436  
1.8406  
1.8345  
1.8316  
1.8245  
1.8157  
1.7132  
1.7020  
1.6952  
1.6897  
1.6854  
1.6831  
1.6801  
1.6776  
1.6720  
1.6673  
1.6629  
1.6601  
1.6539  
1.6503  
1.6450  
1.6414  
1.6364  
1.6322  
1.6282  
1.6102  
1.3035

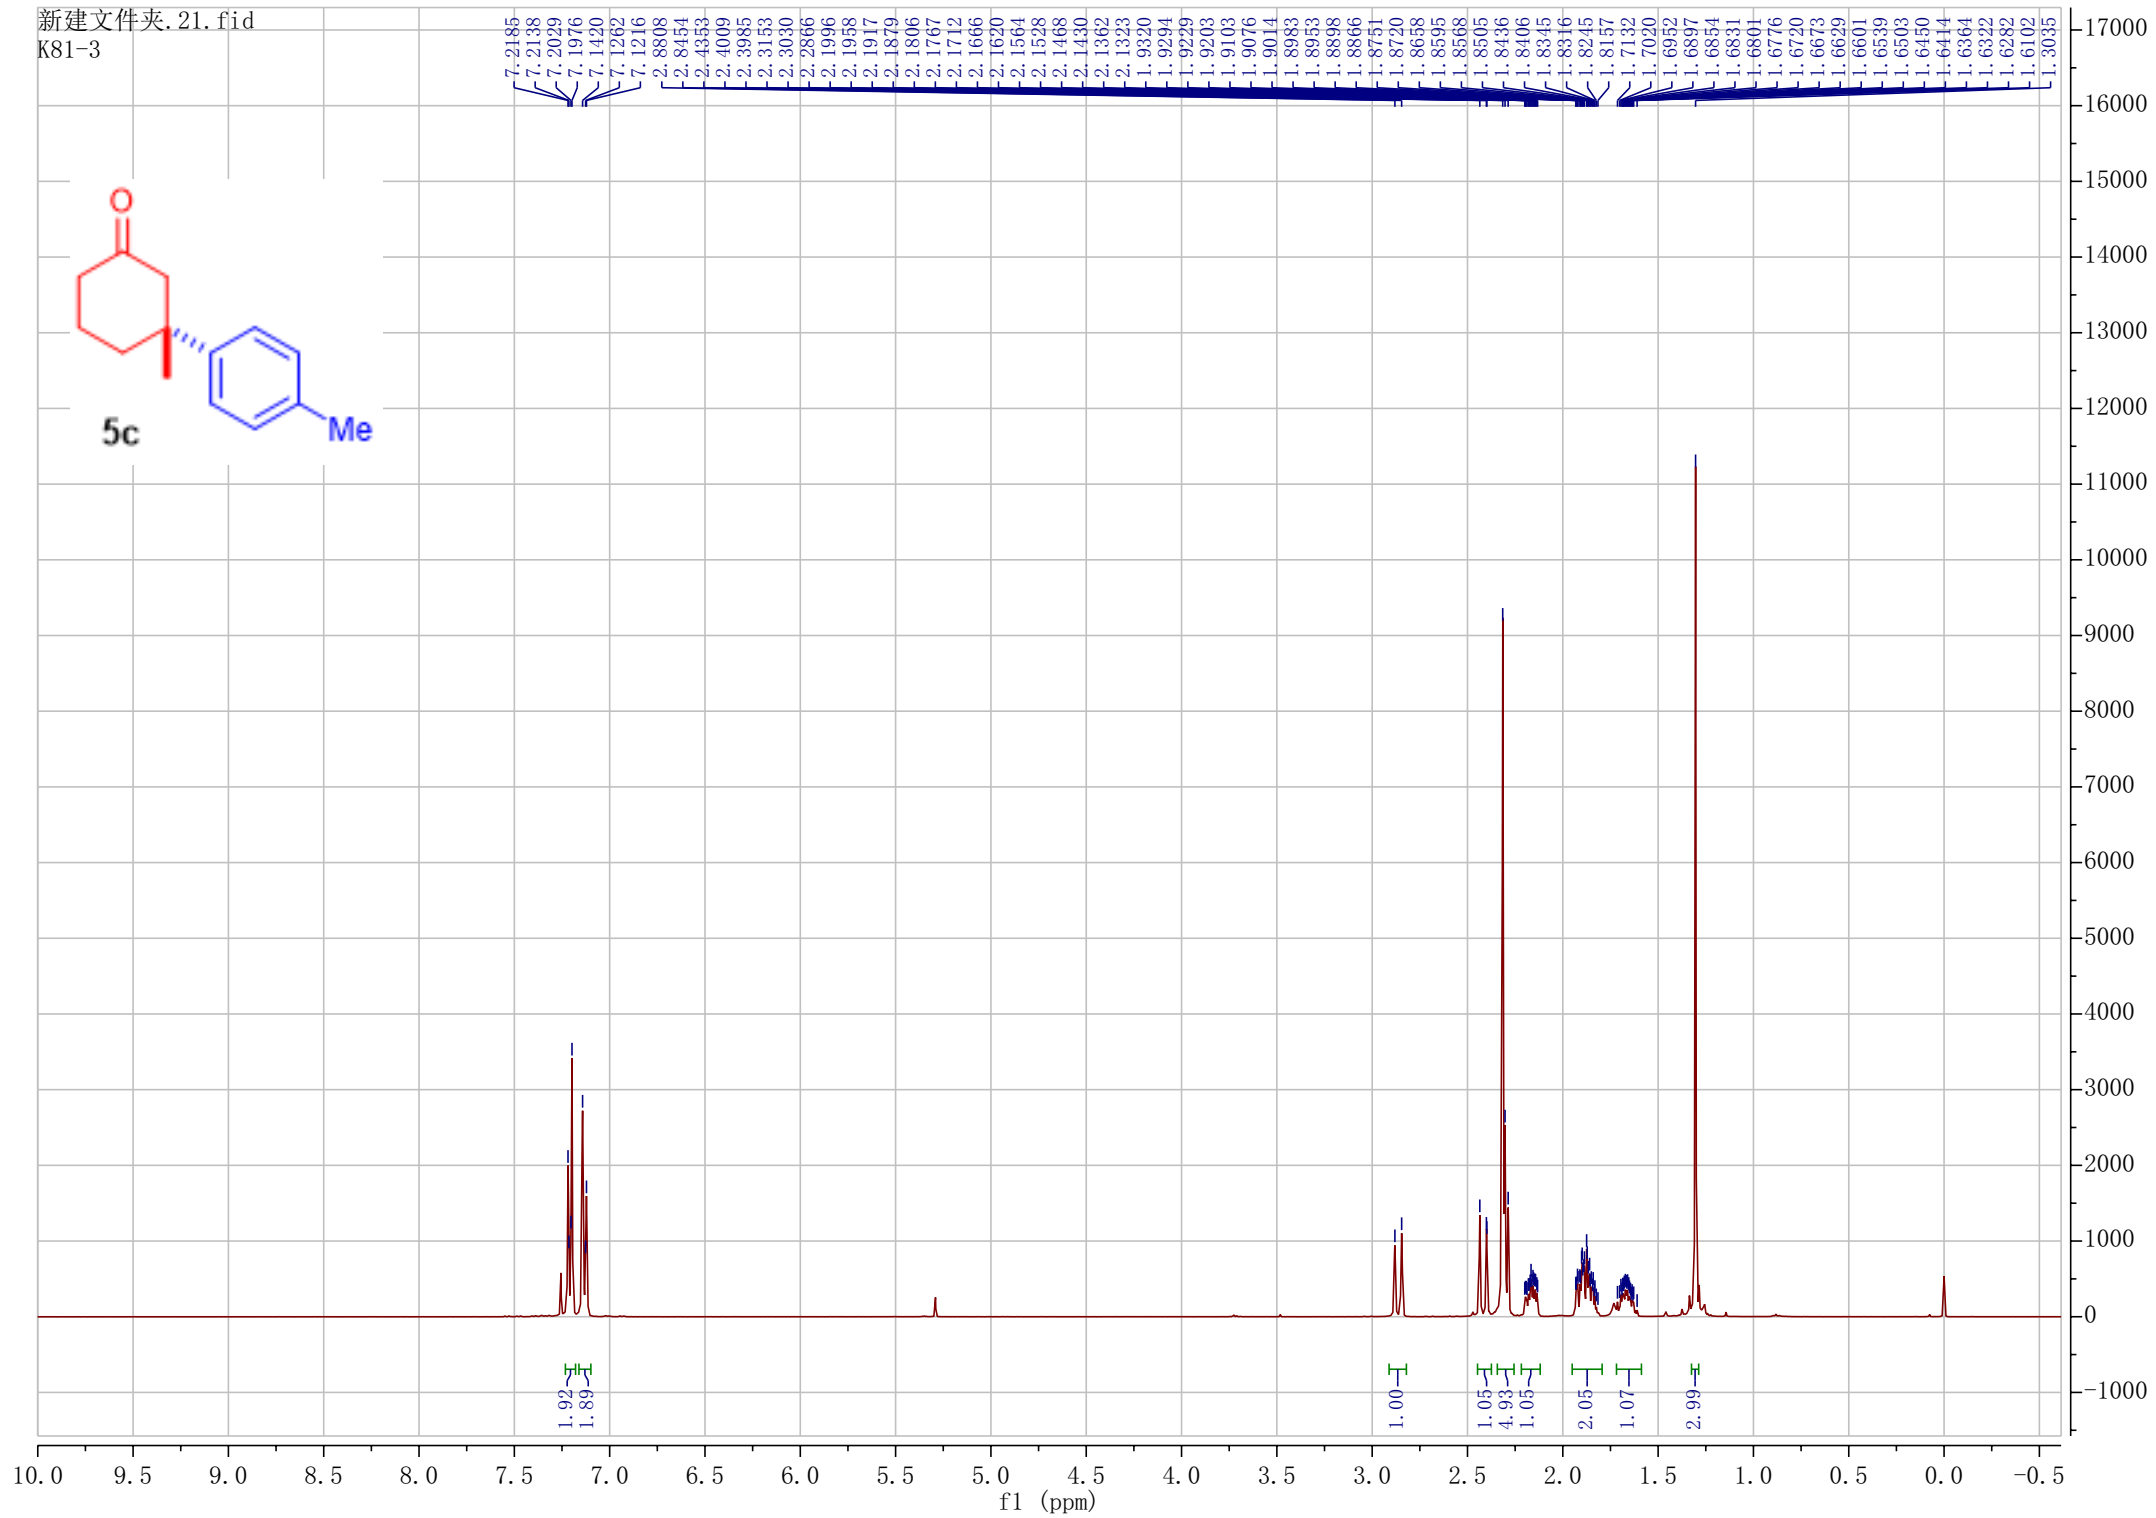

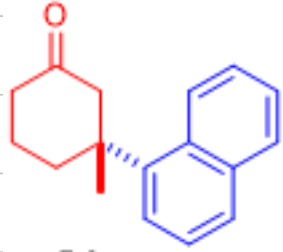

5d

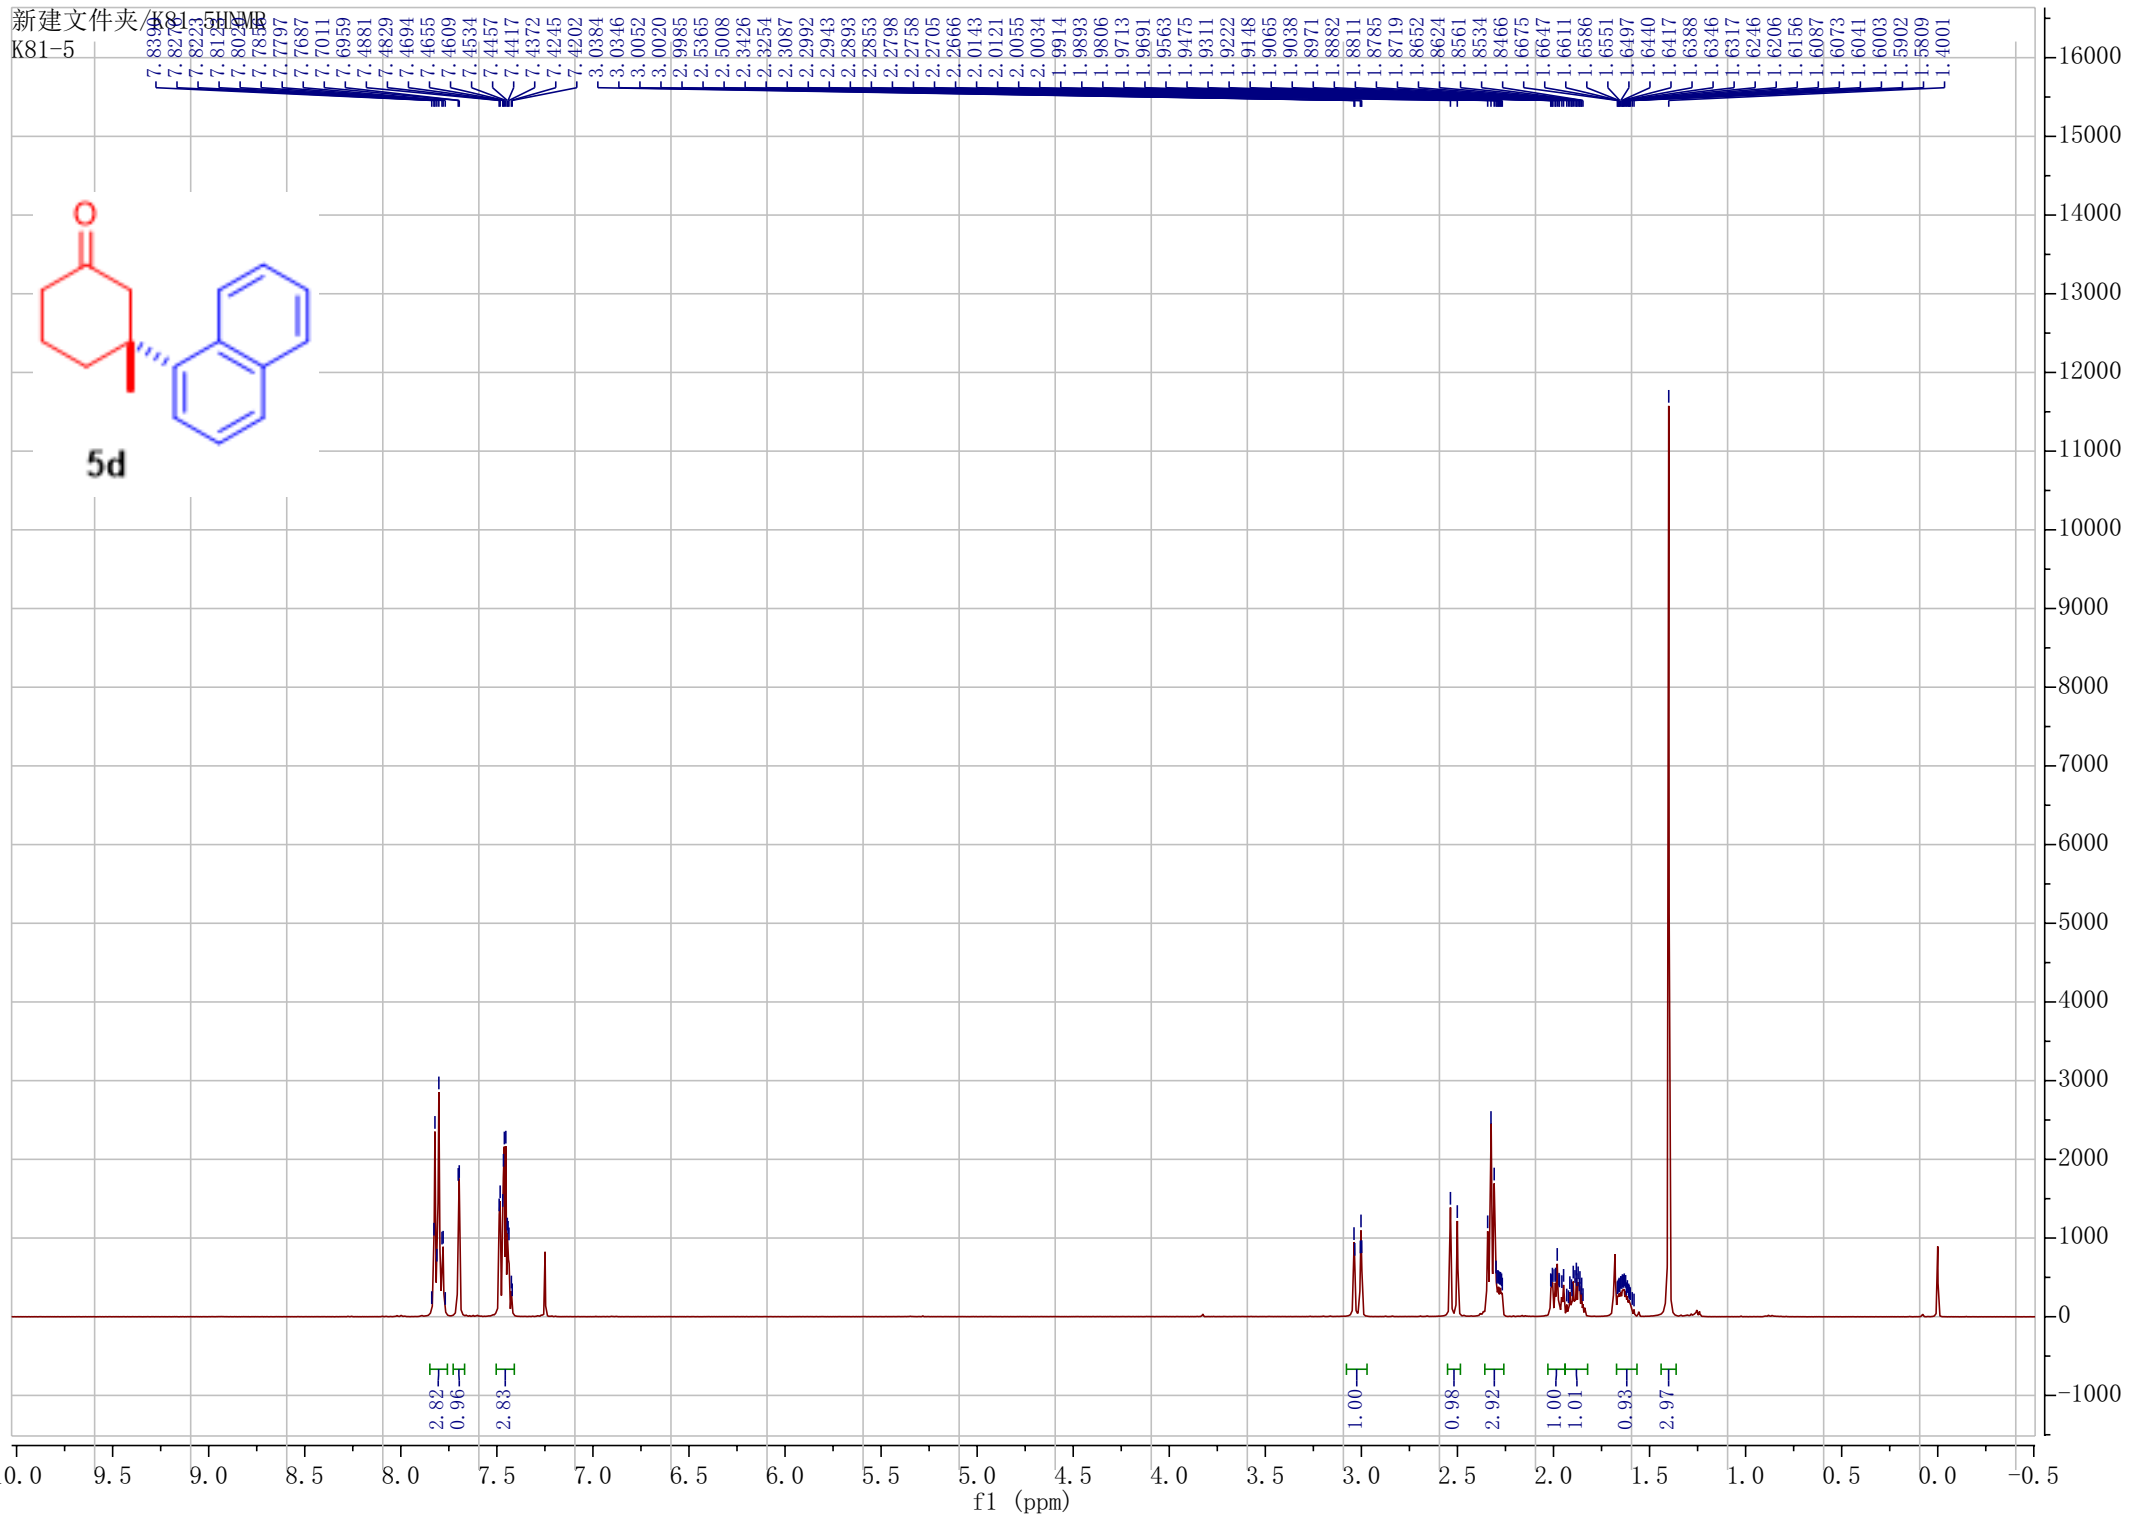



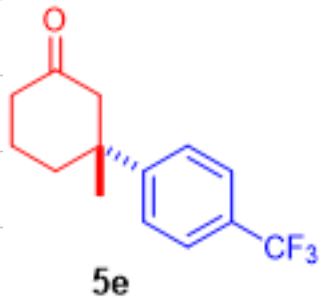

7.5893  
7.5737  
7.4495  
7.4338

2.9002  
2.8719  
2.4925  
2.4642  
2.3807  
2.3640  
2.3332  
2.3020  
2.2105  
2.1954  
2.1760  
1.9842  
1.9641  
1.9380  
1.9128  
1.9048  
1.8994  
1.8924  
1.6168  
1.3431

1.90  
1.98

1.00

1.02  
2.01  
1.31

2.11

2.21

3.20

f1 (ppm)

8.5 8.0 7.5 7.0 6.5 6.0 5.5 5.0 4.5 4.0 3.5 3.0 2.5 2.0 1.5 1.0 0.5 0.0

17000000  
16000000  
15000000  
14000000  
13000000  
12000000  
11000000  
10000000  
9000000  
8000000  
7000000  
6000000  
5000000  
4000000  
3000000  
2000000  
1000000  
0  
-1000000

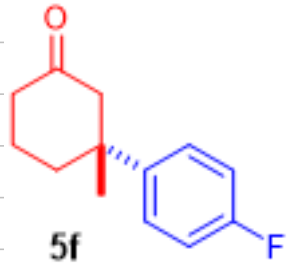

7.3085  
7.3024  
7.2922  
7.2862  
7.2679  
7.2618  
7.2514  
7.2456

2.8676  
2.8321  
2.4590  
2.4236  
2.3399  
2.3223  
2.3063  
2.1979  
2.1834  
2.1740  
2.1645  
2.1587  
2.1494  
2.1355  
1.9559  
1.9472  
1.9337  
1.9231  
1.9117  
1.8996  
1.8756  
1.8662  
1.8573  
1.8503  
1.8413  
1.6959  
1.6788  
1.6688  
1.6603  
1.6510  
1.6430  
1.6188  
1.6145  
1.5992  
1.3152

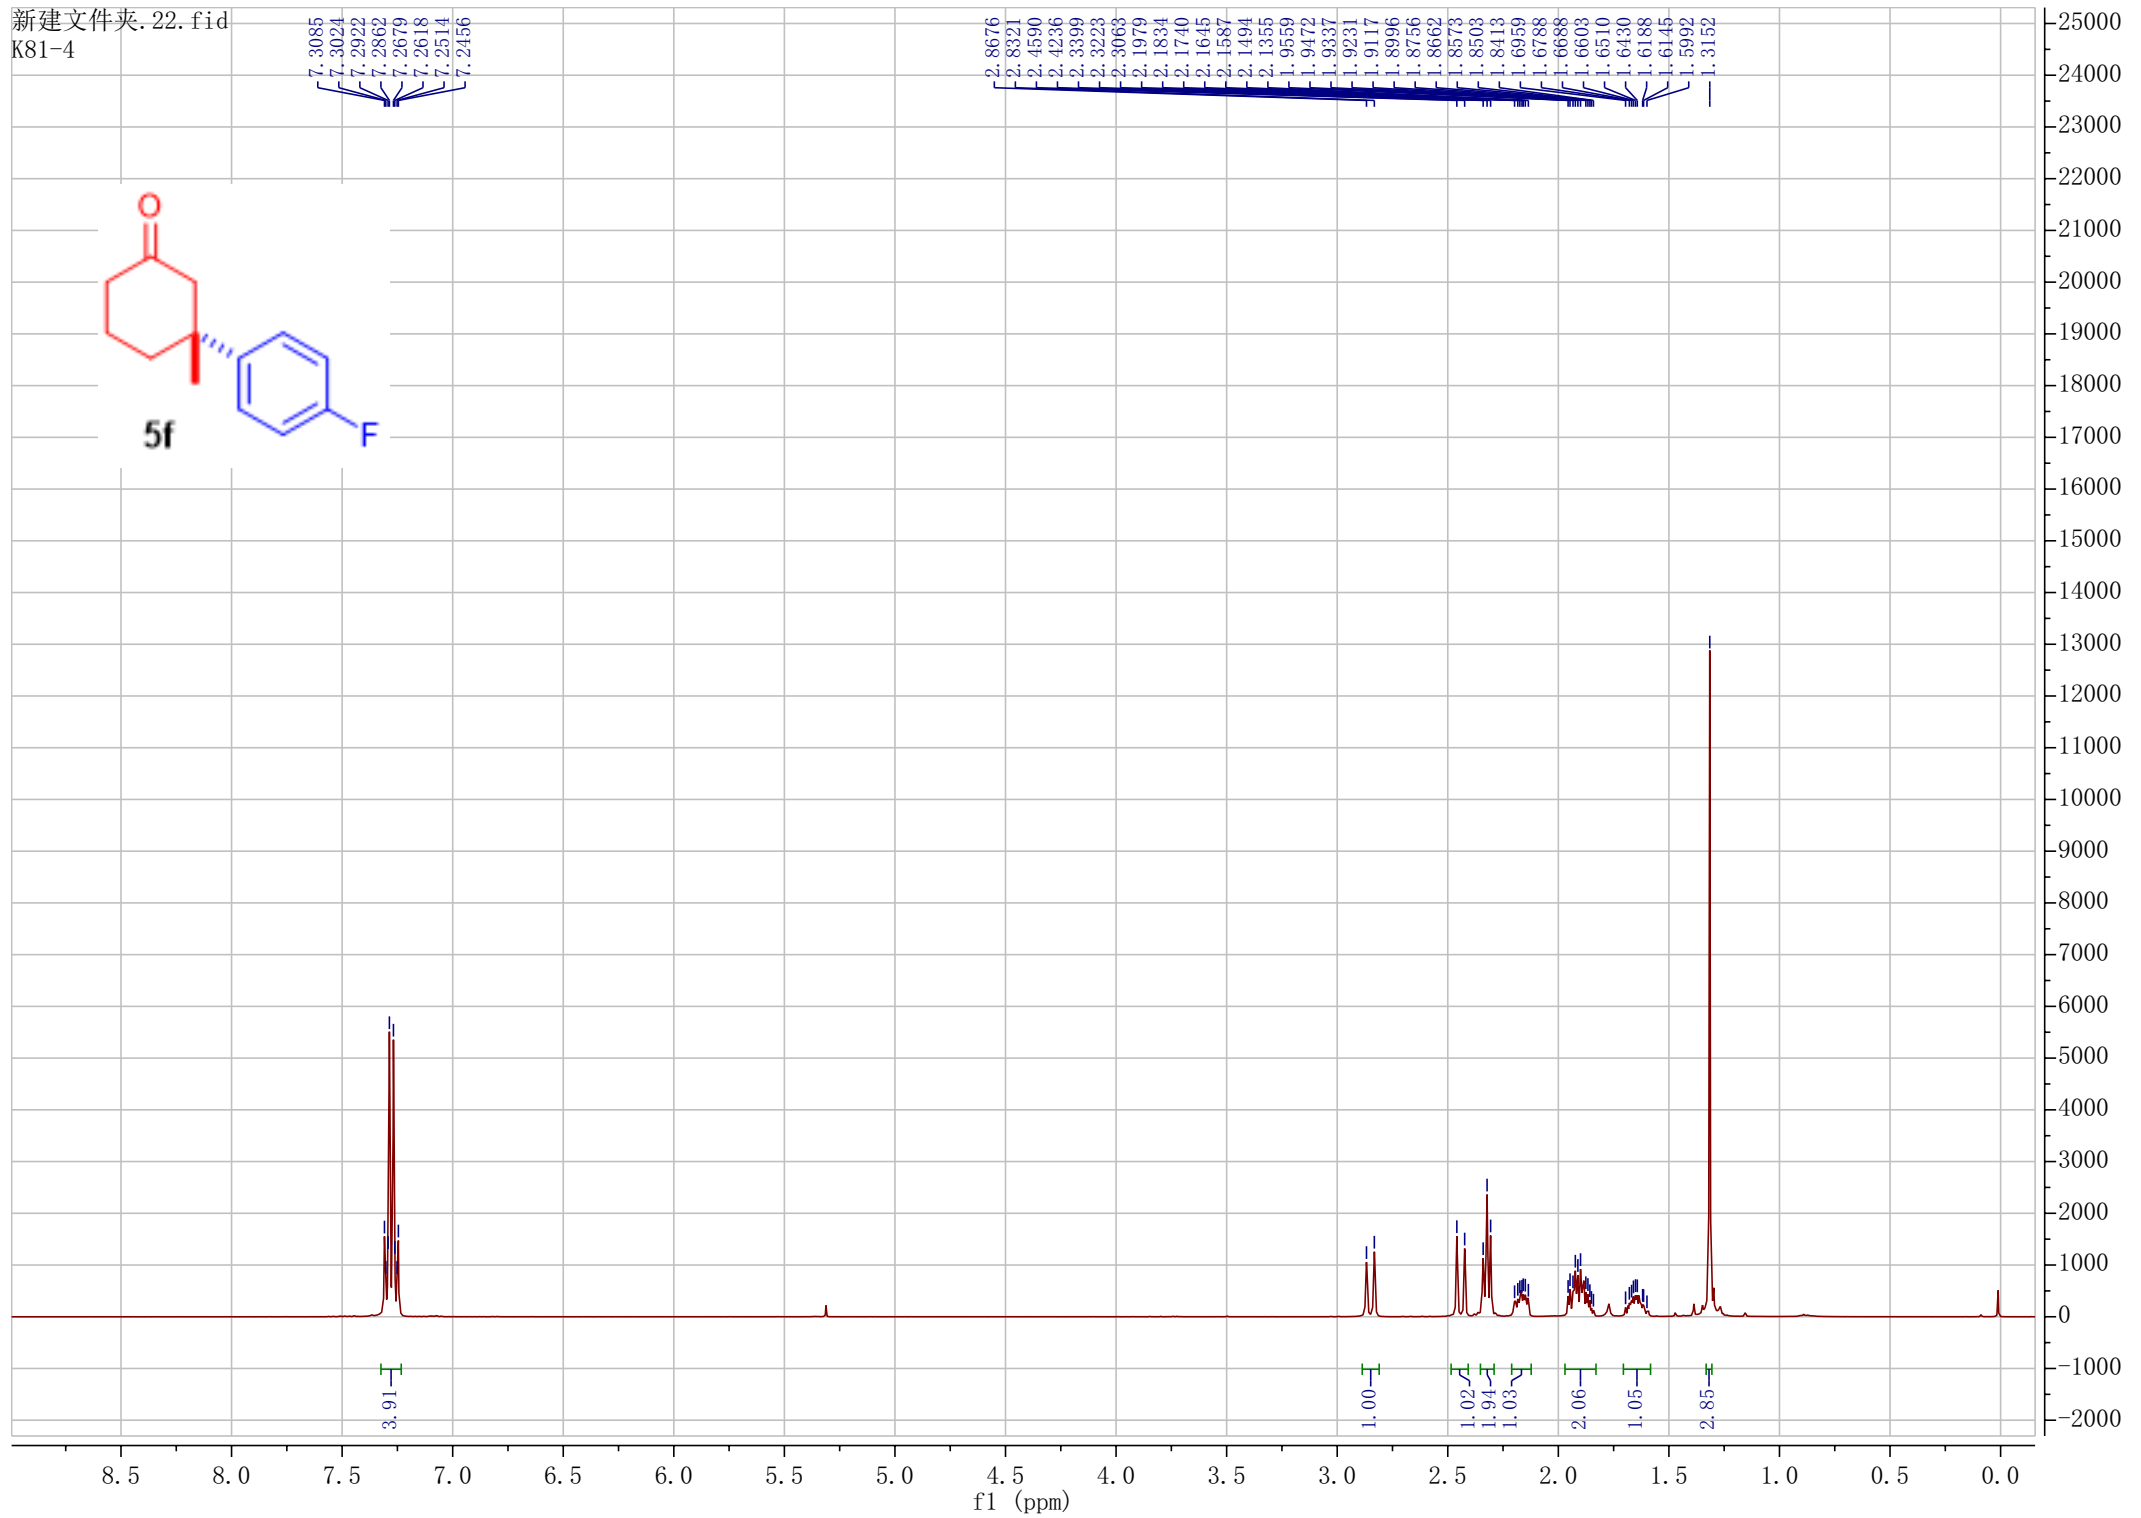

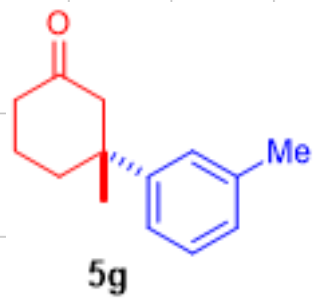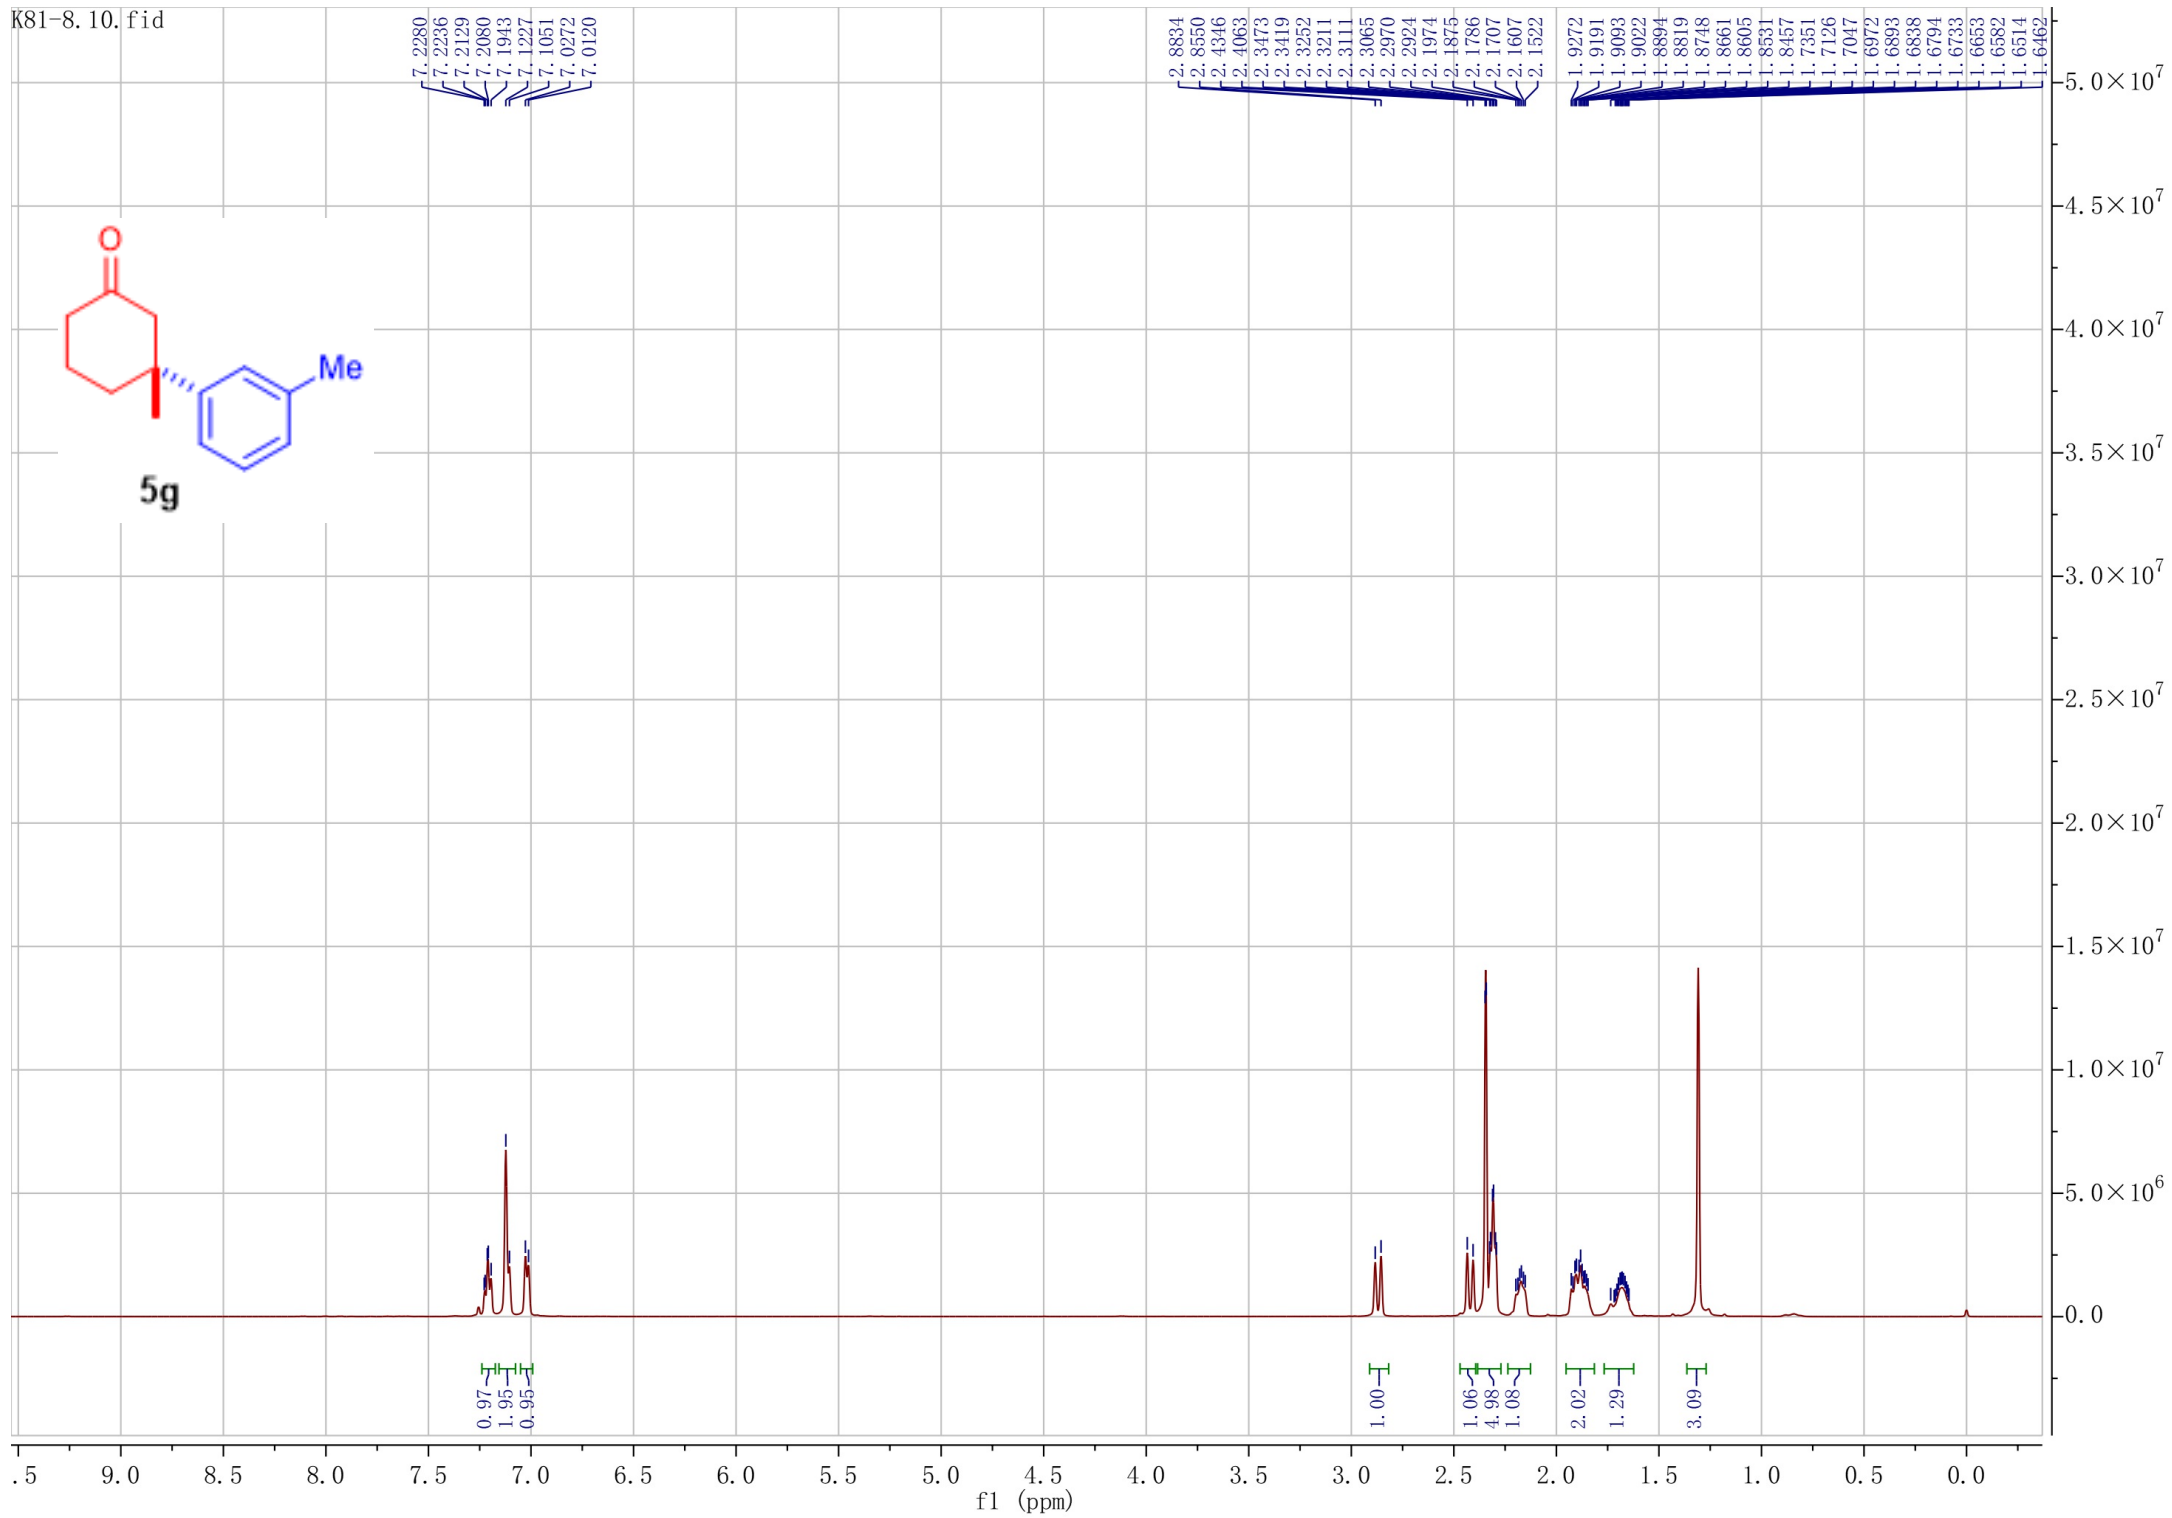

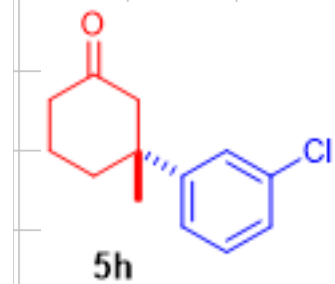

7.3029  
7.2552  
7.2508  
7.2400  
7.2038  
7.1932  
7.1794

2.8455  
2.8172  
2.4499  
2.4216  
2.3375  
2.3231  
2.3090  
2.1796  
2.1571  
2.1420  
2.1338  
1.9415  
1.9250  
1.9193  
1.9123  
1.8981  
1.8834  
1.8753  
1.8686  
1.7087  
1.6963  
1.6840  
1.6783  
1.6694  
1.6555  
1.3079

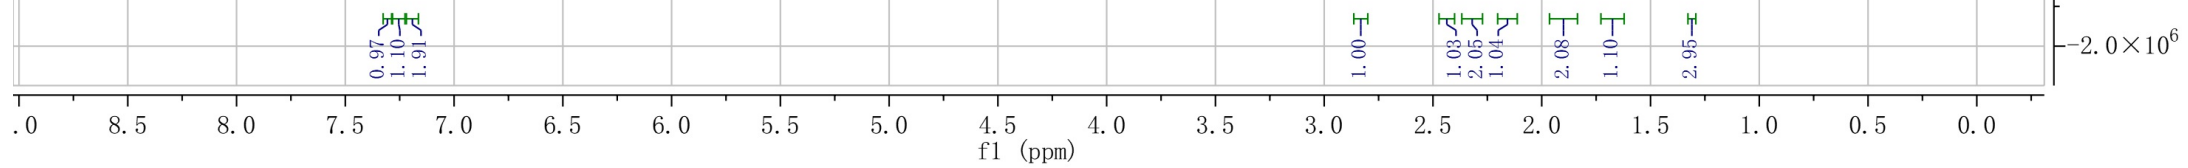

Supplement: d0qo00519c1.pdf [file d0qo00519c1.pdf]
